# Supplementary material for: QTL controlling grain filling under terminal drought stress in a set of wild barley introgression lines
Source: PLoS One. 2017 Oct 20;12(10):e0185983. doi: 10.1371/journal.pone.0185983 (PMC5650137; doi:10.1371/journal.pone.0185983)
Supplement: S1 Table — (XLSX) [file pone.0185983.s001.xlsx]

## Sheet: Tab. S1) 83 S42IL iSelect map
S1 Table: SNP map with 3,059 markers for 83 S42ILs based on the Illumina iSelect chip and SNP positions by Comadran et al. 2012 and additional mapping information by Muñoz-Amatriaín et al. 2014. K: Hv allele, W: Hsp allele, H: heterozygous, N: missing value
Position main introgression		Chromosome			1H	1H	1H	1H	1H	1H	1H	1H	1H	1H	1H	2H	2H	2H	2H	2H	2H	2H	2H	3H	3H	3H	3H	3H	3H	3H	1H	3H	3H	3H	6H	3H	3H	3H	3H	4H	4H	4H	4H	4H	4H	4H	4H	4H	4H
		Begin intr cM			0.2	0.2	0.2	32.2	43.2	46.3	48.1	58.4	82.6	100.8	122.1	8.9	12.5	12.5	33.9	33.9	60.7	89.5	118	23.9	39.6	43.1	59	59	59	69.9	48.6	75.9	86.2	88.2	0.3	120.7	120.7	120.9	139.6	1.1	17.8	35.9	35.9	35.9	35.9	40	43.3	45.7	51.9
		End intr cM			12.5	62.3	46.6	53.7	58.4	48.8	57.3	80.2	112.3	130.8	132.7	17.6	41.2	59.1	62.7	50.1	68.6	97.8	149.5	62.7	83.1	55.2	83.1	90.9	86.4	90.9	57.3	144.9	148.2	109.2	11.3	155	142.2	137.9	154.9	40	49.9	54.6	57.5	81.2	69.3	51	49.9	81.2	81.2
	Comadran et al. 2012		Muñoz-Amatriaín et al. 2014
SNP name	Chromosome	Position cM	Chromosome	Position cM	S42IL-101	S42IL-102	S42IL-178	S42IL-103	S42IL-157	S42IL-104	S42IL-105	S42IL-141	S42IL-143	S42IL-182	S42IL-142	S42IL-106	S42IL-107	S42IL-108	S42IL-109	S42IL-144	S42IL-153	S42IL-110	S42IL-175	S42IL-177	S42IL-154	S42IL-111	S42IL-155	S42IL-112	S42IL-179	S42IL-181	S42IL-158	S42IL-114	S42IL-140	S42IL-159	S42IL-148	S42IL-115	S42IL-113	S42IL-160	S42IL-161	S42IL-116	S42IL-117	S42IL-118	S42IL-120	S42IL-119	S42IL-164	S42IL-184	S42IL-145	S42IL-162	S42IL-121
BOPA1_7174-365	1H	0.212465	1H	1.87	W	H	W	K	K	K	K	K	K	K	K	K	K	K	K	K	K	K	K	W	K	K	K	K	K	K	K	K	K	K	K	K	K	K	K	K	K	K	K	K	K	K	K	K	K
BOPA1_6195-2137	1H	2.33711	1H	2.44	W	M	W	K	K	K	K	K	K	K	K	K	K	K	K	K	K	K	K	W	K	K	K	K	K	K	K	K	K	K	K	K	K	K	K	K	K	K	K	K	K	K	K	K	K
BOPA1_3101-111	1H	4.95751	1H	6.15	W	H	W	K	K	K	K	K	K	K	K	K	K	K	K	K	K	K	K	W	K	K	K	K	K	K	K	K	K	K	K	K	K	K	K	K	K	K	K	K	K	K	K	K	K
BOPA2_12_10636	1H	4.95751	1H	6.15	W	H	W	K	K	K	K	K	K	K	K	K	K	K	K	K	K	K	K	W	K	K	K	K	K	K	K	K	K	K	K	K	K	K	K	K	K	K	K	K	K	K	K	K	K
BOPA2_12_31144	1H	4.95751	1H	4.98	W	H	W	K	K	K	K	K	K	K	K	K	K	K	K	K	K	K	K	W	K	K	K	K	K	K	K	K	K	K	K	K	K	K	K	K	K	K	K	K	K	K	K	K	K
SCRI_RS_66630	1H	4.95751	1H	5.68	W	H	W	K	K	K	K	K	K	K	K	K	K	K	K	K	K	K	K	W	K	K	K	K	K	K	K	K	K	K	K	K	K	K	K	K	K	K	K	K	K	K	K	K	K
SCRI_RS_232577	1H	4.95751	1H	5.68	W	M	W	K	K	K	K	K	K	K	K	K	K	K	K	K	K	K	K	W	K	K	K	K	K	K	K	K	K	K	K	K	K	K	K	K	K	K	K	K	K	K	K	K	K
SCRI_RS_207257	1H	4.95751	-	-	W	H	W	K	K	K	K	K	K	K	K	K	K	K	K	K	K	K	K	W	K	K	K	K	K	K	K	K	K	K	K	K	K	K	K	K	K	K	K	K	K	K	K	K	K
SCRI_RS_149683	1H	4.95751	-	-	W	H	W	K	K	K	K	K	K	K	K	K	K	K	K	K	K	K	K	W	K	K	K	K	K	K	K	K	K	K	K	K	K	K	K	K	K	K	K	K	K	K	K	K	K
BOPA1_7372-1253	1H	8.49858	1H	10.35	W	H	W	K	K	K	K	K	K	K	K	K	K	K	K	K	K	K	K	W	K	K	K	K	K	K	K	K	K	K	K	K	K	K	K	K	K	K	K	K	K	K	K	K	K
SCRI_RS_1929	1H	9.91501	1H	10.7	W	W	W	K	K	K	K	K	K	K	K	K	K	K	K	K	K	K	K	W	K	K	K	K	K	K	K	K	K	K	K	K	K	K	K	K	K	K	K	K	K	K	K	K	K
BOPA2_12_31149	1H	10.9065	1H	11.7	W	W	W	K	K	K	K	K	K	K	K	K	K	K	K	K	K	K	K	W	K	K	K	K	K	K	K	K	K	K	K	K	K	K	K	K	K	K	K	K	K	K	K	K	K
SCRI_RS_165792	1H	11.7564	-	-	W	W	W	K	K	K	K	K	K	K	K	K	K	K	K	K	K	K	K	W	K	K	K	K	K	K	K	K	K	K	K	K	K	K	K	K	K	K	K	K	K	K	K	K	K
SCRI_RS_119312	1H	12.4646	1H	13.3	W	W	W	K	K	K	K	K	K	K	K	K	K	K	K	K	K	K	K	W	K	K	K	K	K	K	K	K	K	K	K	K	K	K	K	K	K	K	K	K	K	K	K	K	K
BOPA2_12_30588	1H	15.085	1H	15.9	K	W	W	K	K	K	K	K	K	K	K	K	K	K	K	K	K	K	K	W	K	K	K	K	K	K	K	K	K	K	K	K	K	K	K	K	K	K	K	K	K	K	K	K	K
SCRI_RS_148733	1H	15.085	1H	15.9	K	W	W	K	K	K	K	K	K	K	K	K	K	K	K	K	K	K	K	W	K	K	K	K	K	K	K	K	K	K	K	K	K	K	K	K	K	K	K	K	K	K	K	K	K
SCRI_RS_130600	1H	16.3598	1H	17.2	K	W	W	K	K	K	K	K	K	K	K	K	K	K	K	K	K	K	K	W	K	K	K	K	K	K	K	K	K	K	K	K	K	K	K	K	K	K	K	K	K	K	K	K	K
SCRI_RS_130592	1H	16.4306	1H	17.2	K	W	W	K	K	K	K	K	K	K	K	K	K	K	K	K	K	K	K	W	K	K	K	K	K	K	K	K	K	K	K	K	K	K	K	K	K	K	K	K	K	K	K	K	K
SCRI_RS_3336	1H	17.7762	1H	18.6	K	W	W	K	K	K	K	K	K	K	K	K	K	K	K	K	K	K	K	W	K	K	K	K	K	K	K	K	K	K	K	K	K	K	K	K	K	K	K	K	K	K	K	K	K
SCRI_RS_205669	1H	17.847	1H	18.6	K	W	W	K	K	K	K	K	K	K	K	K	K	K	K	K	K	K	K	W	K	K	K	K	K	K	K	K	K	K	K	K	K	K	K	K	K	K	K	K	K	K	K	K	K
SCRI_RS_171186	1H	17.847	-	-	K	H	H	K	K	K	K	K	K	K	K	K	K	K	K	K	K	K	K	H	K	K	K	K	K	K	K	K	K	K	K	K	K	K	K	K	K	K	K	K	K	K	K	K	K
SCRI_RS_152464	1H	18.272	1H	19.1	K	W	W	K	K	K	K	K	K	K	K	K	K	K	K	K	K	K	K	W	K	K	K	K	K	K	K	K	K	K	K	K	K	K	K	K	K	K	K	K	K	K	K	K	K
BOPA2_12_30948	1H	18.4844	1H	20.31	K	H	H	K	K	K	K	K	K	K	K	K	K	K	K	K	K	K	K	H	K	K	K	K	K	K	K	K	K	K	K	K	K	K	K	K	K	K	K	K	K	K	K	K	K
BOPA1_10922-503	1H	21.3173	1H	21.99	K	W	W	K	K	K	K	K	K	K	K	K	K	K	K	K	K	K	K	W	K	K	K	K	K	K	K	K	K	K	K	K	K	K	K	K	K	K	K	K	K	K	K	K	K
SCRI_RS_189506	1H	21.3173	1H	21.99	M	M	W	K	K	K	K	K	K	K	K	K	K	K	M	K	K	M	K	W	M	K	M	K	K	M	K	K	M	K	M	K	K	K	M	K	M	M	K	K	K	K	K	M	K
SCRI_RS_124926	1H	27.0538	1H	26.32	K	W	M	K	K	K	K	K	K	K	K	K	K	K	K	K	K	K	K	K	K	K	K	K	K	K	K	K	K	K	K	K	K	K	K	K	K	K	K	K	K	K	K	K	K
BOPA1_5318-436	1H	28.1161	1H	28.78	K	W	M	K	K	K	K	K	K	K	K	K	K	K	K	K	K	K	K	K	K	K	K	K	K	K	K	K	K	K	K	K	K	K	K	K	K	K	K	K	K	K	K	K	K
SCRI_RS_155382	1H	28.3994	1H	28.78	K	W	M	K	M	K	K	K	K	K	K	K	K	K	K	K	M	K	K	K	K	K	K	K	K	K	K	K	M	K	K	K	K	K	K	K	K	K	K	K	K	K	K	K	K
BOPA2_12_31276	1H	32.153	1H	32.09	K	W	W	H	K	K	K	K	K	K	K	K	K	K	K	K	K	K	K	K	K	K	K	K	K	K	K	K	K	K	K	K	K	K	K	K	K	K	K	K	K	K	K	K	K
BOPA2_12_31177	1H	38.0312	1H	37.1	K	W	W	W	K	K	K	K	K	K	K	K	K	K	K	K	K	K	K	K	K	K	K	K	K	K	K	K	K	K	K	K	K	K	K	K	K	K	K	K	K	K	K	K	K
BOPA2_12_30336	1H	40.085	1H	42.17	K	W	W	W	K	K	K	K	K	K	K	K	K	K	K	K	K	K	K	K	K	K	K	K	K	K	K	K	K	K	K	K	K	K	K	K	K	K	K	K	K	K	K	K	K
SCRI_RS_114047	1H	40.085	1H	42.01	K	W	W	W	K	K	K	K	K	K	K	K	K	K	K	K	K	K	K	K	K	K	K	K	K	K	K	K	K	K	K	K	K	K	K	K	K	K	K	K	K	K	K	K	K
BOPA1_5381-1950	1H	41.5014	1H	43.62	K	W	W	W	K	K	K	K	K	K	K	K	K	K	K	K	K	K	K	K	K	K	K	K	K	K	K	K	K	K	K	K	K	K	K	K	K	K	K	K	K	K	K	K	K
SCRI_RS_170878	1H	41.5014	1H	43.41	K	W	W	W	K	K	K	K	K	K	K	K	K	K	K	K	K	K	K	K	K	K	K	K	K	K	K	K	K	K	K	K	K	K	K	K	K	K	K	K	K	K	K	K	K
SCRI_RS_153785	1H	41.5014	1H	43.41	K	W	W	W	K	K	K	K	K	K	K	K	K	K	K	K	K	K	K	K	K	K	K	K	K	K	K	K	K	K	K	K	K	K	K	K	K	K	K	K	K	K	K	K	K
SCRI_RS_170869	1H	41.5014	1H	43.41	K	W	W	W	K	K	K	K	K	K	K	K	K	K	K	K	K	K	K	K	K	K	K	K	K	K	K	K	K	K	K	K	K	K	K	K	K	K	K	K	K	K	K	K	K
SCRI_RS_140837	1H	41.9263	1H	43.81	K	W	W	W	K	K	K	K	K	K	K	K	K	K	K	K	K	K	K	K	K	K	K	K	K	K	K	K	K	K	K	K	K	K	K	K	K	K	K	K	K	K	K	K	K
SCRI_RS_189197	1H	42.2096	-	-	K	W	W	W	K	K	K	K	K	K	K	K	K	K	K	K	K	K	K	K	K	K	K	K	K	K	K	K	K	K	K	K	K	K	K	K	K	K	K	K	K	K	K	K	K
SCRI_RS_205816	1H	42.3513	1H	44.31	K	W	W	W	K	K	K	K	K	K	K	K	K	K	K	K	K	K	K	K	K	K	K	K	K	K	K	K	K	K	K	K	K	K	K	K	K	K	K	K	K	K	K	K	K
SCRI_RS_160545	1H	42.3513	1H	44.31	K	W	W	W	K	K	K	K	K	K	K	K	K	K	K	K	K	K	K	K	K	K	K	K	K	K	K	K	K	K	K	K	K	K	K	K	K	K	K	K	K	K	K	K	K
SCRI_RS_189637	1H	42.3513	-	-	K	W	W	W	K	K	K	K	K	K	K	K	K	K	K	K	K	K	K	K	K	K	K	K	K	K	K	K	K	K	K	K	K	K	K	K	K	K	K	K	K	K	K	K	K
BOPA1_3277-446	1H	43.0595	1H	44.69	K	W	W	W	K	K	K	K	K	K	K	K	K	K	K	K	K	K	K	K	K	K	K	K	K	K	K	K	K	K	K	K	K	K	K	K	K	K	K	K	K	K	K	K	K
SCRI_RS_183171	1H	43.0595	1H	45.01	K	W	W	W	K	K	K	K	K	K	K	K	K	K	K	K	K	K	K	K	K	K	K	K	K	K	K	K	K	K	K	K	K	K	K	K	K	K	K	K	K	K	K	K	K
SCRI_RS_147042	1H	43.0595	1H	45.01	K	W	W	W	K	K	K	K	K	K	K	K	K	K	K	K	K	K	K	K	K	K	K	K	K	K	K	K	K	K	K	K	K	K	K	K	K	K	K	K	K	K	K	K	K
BOPA1_6720-641	1H	43.2011	1H	45.11	K	W	W	W	W	K	K	K	K	K	K	K	K	K	K	K	K	K	K	K	K	K	K	K	K	K	K	K	K	K	K	K	K	K	K	K	K	K	K	K	K	K	K	K	K
SCRI_RS_199179	1H	43.3428	1H	45.21	K	M	M	M	M	K	K	K	K	K	K	K	K	K	K	K	K	K	K	K	K	K	K	K	K	K	K	K	K	K	K	K	K	K	K	K	K	K	K	K	K	K	K	K	K
SCRI_RS_9480	1H	43.3428	1H	45.21	K	W	W	W	W	K	K	K	K	K	K	K	K	K	K	K	K	K	K	K	K	K	K	K	K	K	K	K	K	K	K	K	K	K	K	K	K	K	K	K	K	K	K	K	K
SCRI_RS_132461	1H	43.4844	1H	45.41	K	W	W	W	W	K	K	K	K	K	K	K	K	K	K	K	K	K	K	K	K	K	K	K	K	K	K	K	K	K	K	K	K	K	K	K	K	K	K	K	K	K	K	K	K
BOPA1_2265-363	1H	46.3173	1H	48.12	K	W	W	W	W	W	K	K	K	K	K	K	K	K	K	K	K	K	K	K	K	K	K	K	K	K	K	K	K	K	K	K	K	K	K	K	K	K	K	K	K	K	K	K	K
BOPA1_3710-852	1H	46.4589	1H	48.8	K	M	W	W	W	W	K	K	K	K	K	K	K	K	K	K	K	K	K	K	K	K	K	K	K	K	K	K	K	K	K	K	K	K	K	K	K	K	K	K	K	K	K	K	K
BOPA2_12_31467	1H	46.4589	1H	49.1	K	M	W	W	W	W	K	K	K	K	K	K	K	K	K	K	K	K	K	K	K	K	K	K	K	K	K	K	K	K	K	K	K	K	K	K	K	K	K	K	K	K	K	K	K
BOPA2_12_30683	1H	46.6006	1H	49.1	K	M	W	W	W	W	K	K	K	K	K	K	K	K	K	K	K	K	K	K	K	K	K	K	K	K	K	K	K	K	K	K	K	K	K	K	K	K	K	K	K	K	K	K	K
SCRI_RS_151764	1H	46.6006	1H	49.1	K	M	W	W	W	W	K	K	K	K	K	K	K	K	K	K	K	K	K	K	K	K	K	K	K	K	K	K	K	K	K	K	K	K	K	K	K	K	K	K	K	K	K	K	K
BOPA2_12_30796	1H	47.5212	1H	49.6	K	M	K	W	W	W	K	K	K	K	K	K	K	K	K	K	K	K	K	K	K	K	K	K	K	K	K	K	K	K	K	K	K	K	K	K	K	K	K	K	K	K	K	K	K
BOPA1_3444-1044	1H	47.6629	1H	50	K	M	K	W	W	W	K	K	K	K	K	K	K	K	K	K	K	K	K	K	K	K	K	K	K	K	K	K	K	K	K	K	K	K	K	K	K	K	K	K	K	K	K	K	K
BOPA1_ABC02639-1-4-370	1H	47.6629	1H	49.8	K	M	K	W	W	W	K	K	K	K	K	K	K	K	K	K	K	K	K	K	K	K	K	K	K	K	K	K	K	K	K	K	K	K	K	K	K	K	K	K	K	K	K	K	K
BOPA1_ConsensusGBS0342-1	1H	47.6629	1H	50	K	M	K	W	W	W	K	K	K	K	K	K	K	K	K	K	K	K	K	K	K	K	K	K	K	K	K	K	K	K	K	K	K	K	K	K	K	K	K	K	K	K	K	K	K
SCRI_RS_17924	1H	47.6629	1H	49.8	K	M	K	W	W	W	K	K	K	K	K	K	K	K	K	K	K	K	K	K	K	K	K	K	K	K	K	K	K	K	K	K	K	K	K	K	K	K	K	K	K	K	K	K	K
SCRI_RS_82327	1H	47.6629	1H	49.8	K	W	K	W	W	W	K	K	K	K	K	K	K	K	K	K	K	K	K	K	K	K	K	K	K	K	K	K	K	K	K	K	K	K	K	K	K	K	K	K	K	K	K	K	K
SCRI_RS_85917	1H	47.6629	1H	49.8	K	M	K	W	W	W	K	K	K	K	K	K	K	K	K	K	K	K	K	K	K	K	K	K	K	K	K	K	K	K	K	K	K	K	K	K	K	K	K	K	K	K	K	K	K
SCRI_RS_85918	1H	47.6629	1H	49.8	K	M	K	W	W	W	K	K	K	K	K	K	K	K	K	K	K	K	K	K	K	K	K	K	K	K	K	K	K	K	K	K	K	K	K	K	K	K	K	K	K	K	K	K	K
SCRI_RS_139785	1H	47.6629	1H	49.8	K	W	K	W	W	W	K	K	K	K	K	K	K	K	K	K	K	K	K	K	K	K	K	K	K	K	K	K	K	K	K	K	K	K	K	K	K	K	K	K	K	K	K	K	K
BOPA1_8613-278	1H	47.8045	1H	50	K	M	K	W	W	W	K	K	K	K	K	K	K	K	K	K	K	K	K	K	K	K	K	K	K	K	K	K	K	K	K	K	K	K	K	K	K	K	K	K	K	K	K	K	K
BOPA2_12_10506	1H	47.9462	1H	50	K	W	K	W	W	W	K	K	K	K	K	K	K	K	K	K	K	K	K	K	K	K	K	K	K	K	K	K	K	K	K	K	K	K	K	K	K	K	K	K	K	K	K	K	K
BOPA1_2851-848	1H	48.0878	1H	50	K	M	K	W	W	W	W	K	K	K	K	K	K	K	K	K	K	K	K	K	K	K	K	K	K	K	K	K	K	K	K	K	K	K	K	K	K	K	K	K	K	K	K	K	K
BOPA1_4163-1786	1H	48.0878	1H	50	K	W	K	W	W	W	W	K	K	K	K	K	K	K	K	K	K	K	K	K	K	K	K	K	K	K	K	K	K	K	K	K	K	K	K	K	K	K	K	K	K	K	K	K	K
BOPA1_7090-1260	1H	48.0878	1H	50	H	W	K	W	W	W	W	K	K	K	K	K	K	K	K	K	K	K	K	K	K	W	K	K	K	K	K	K	K	K	K	K	K	K	K	K	K	K	K	K	K	K	K	K	K
BOPA1_ABC11913-1-1-104	1H	48.0878	1H	50	H	M	K	W	W	W	W	K	K	K	K	K	K	K	K	K	K	K	K	K	K	W	K	K	K	K	K	K	K	K	K	K	K	K	K	K	K	K	K	K	K	K	K	K	K
BOPA2_12_10300	1H	48.0878	1H	50	H	M	K	W	W	W	W	K	K	K	K	K	K	K	K	K	K	K	K	K	K	K	K	K	K	K	K	K	K	K	K	K	K	K	K	K	K	K	K	K	K	K	K	K	K
BOPA2_12_30562	1H	48.0878	1H	50	K	W	K	W	W	W	W	K	K	K	K	K	K	K	K	K	K	K	K	K	K	K	K	K	K	K	K	K	K	K	K	K	K	K	K	K	K	K	K	K	K	K	K	K	K
SCRI_RS_141511	1H	48.0878	1H	50	K	M	K	W	W	W	W	K	K	K	K	K	K	K	K	K	K	K	K	K	K	K	K	K	K	K	K	K	K	K	K	K	K	K	K	K	K	K	K	K	K	K	K	K	K
BOPA1_4020-643	1H	48.2295	1H	50	H	W	K	W	W	W	W	K	K	K	K	K	K	K	K	K	K	K	K	K	K	K	K	K	K	K	K	K	K	K	K	K	K	K	K	K	K	K	K	K	K	K	K	K	K
BOPA2_12_31208	1H	48.2295	1H	50	H	W	K	W	W	W	W	K	K	K	K	K	K	K	K	K	K	K	K	K	K	K	K	K	K	K	K	K	K	K	K	K	K	K	K	K	K	K	K	K	K	K	K	K	K
SCRI_RS_189586	1H	48.2295	1H	50	H	W	K	W	W	W	W	K	K	K	K	K	K	K	K	K	K	K	K	K	K	K	K	K	K	K	K	K	K	K	K	K	K	K	K	K	K	K	K	K	K	K	K	K	K
SCRI_RS_143927	1H	48.2295	1H	50	M	M	K	W	W	W	W	K	K	K	K	K	K	K	K	K	K	K	K	K	K	K	K	K	K	K	K	K	K	K	K	K	K	K	K	K	K	K	K	K	K	K	K	K	K
SCRI_RS_186830	1H	48.2295	1H	50	H	W	K	W	W	W	W	K	K	K	K	K	K	K	K	K	K	K	K	K	K	K	K	K	K	K	K	K	K	K	K	K	K	K	K	K	K	K	K	K	K	K	K	K	K
SCRI_RS_213103	1H	48.2295	1H	50	M	M	K	W	W	W	W	K	K	K	K	K	K	K	K	K	K	K	K	K	K	K	K	K	K	K	K	K	K	K	K	K	K	K	K	K	K	K	K	K	K	K	K	K	K
SCRI_RS_124377	1H	48.2295	1H	50	H	W	K	W	W	W	W	K	K	K	K	K	K	K	K	K	K	K	K	K	K	K	K	K	K	K	K	K	K	K	K	K	K	K	K	K	K	K	K	K	K	K	K	K	K
BOPA1_1294-473	1H	48.3711	1H	50	H	W	K	W	W	W	W	K	K	K	K	K	K	K	K	K	K	K	K	K	K	K	K	K	K	K	K	K	K	K	K	K	K	K	K	K	K	K	K	K	K	K	K	K	K
SCRI_RS_132599	1H	48.3711	1H	50	H	W	K	W	W	W	W	K	K	K	K	K	K	K	K	K	K	K	K	K	K	K	K	K	K	K	K	K	K	K	K	K	K	K	K	K	K	K	K	K	K	K	K	K	K
SCRI_RS_132604	1H	48.3711	1H	50	H	M	K	W	W	W	W	K	K	K	K	K	K	K	K	K	K	K	K	K	K	K	K	K	K	K	K	K	K	K	K	K	K	K	K	K	K	K	K	K	K	K	K	K	K
SCRI_RS_189248	1H	48.3711	1H	50	M	M	K	W	W	W	W	K	K	K	K	K	K	K	K	K	K	K	K	K	K	K	K	K	K	K	K	K	K	K	K	K	K	K	K	K	K	K	K	K	K	K	K	K	K
SCRI_RS_7813	1H	48.3711	1H	50	H	M	K	W	W	W	W	K	K	K	K	K	K	K	K	K	K	K	K	K	K	K	K	K	K	K	K	K	K	K	K	K	K	K	K	K	K	K	K	K	K	K	K	K	K
SCRI_RS_130590	1H	48.3711	1H	50	H	M	K	W	W	W	W	K	K	K	K	K	K	K	K	K	K	K	K	K	K	K	K	K	K	K	K	K	K	K	K	K	K	K	K	K	K	K	K	K	K	K	K	K	K
SCRI_RS_7197	1H	48.3711	1H	50	H	M	K	W	W	W	W	K	K	K	K	K	K	K	K	K	K	K	K	K	K	K	K	K	K	K	K	K	K	K	K	K	K	K	K	K	K	K	K	K	K	K	K	K	K
SCRI_RS_155439	1H	48.3711	1H	50	H	M	K	W	W	W	W	K	K	K	K	K	K	K	K	K	K	K	K	K	K	K	K	K	K	K	K	K	K	K	K	K	K	K	K	K	K	K	K	K	K	K	K	K	K
BOPA1_ConsensusGBS0371-2	1H	48.3711	1H	50	M	W	K	W	W	W	W	K	K	K	K	K	K	K	K	K	K	K	K	K	K	K	K	K	K	K	K	K	K	K	K	K	K	K	K	K	K	K	K	K	K	K	K	K	K
BOPA2_12_30592	1H	48.3711	1H	50	H	M	K	W	W	W	W	K	K	K	K	K	K	K	K	K	K	K	K	K	K	K	K	K	K	K	K	K	K	K	K	K	K	K	K	K	K	K	K	K	K	K	K	K	K
BOPA2_12_31272	1H	48.3711	1H	50	M	M	K	W	W	W	W	K	K	K	K	K	K	K	K	M	K	K	K	K	K	K	K	K	K	K	K	K	K	K	K	K	K	K	K	K	K	K	K	K	K	K	M	K	K
SCRI_RS_141598	1H	48.3711	-	-	H	M	K	W	W	W	W	K	K	K	K	K	K	K	K	K	K	K	K	K	K	K	K	K	K	K	K	K	K	K	K	K	K	K	K	K	K	K	K	K	K	K	K	K	K
SCRI_RS_122889	1H	48.5127	1H	50	H	M	K	W	W	W	W	K	K	K	K	K	K	K	K	K	K	K	K	K	K	K	K	K	K	K	K	K	K	K	K	K	K	K	K	K	K	K	K	K	K	K	K	K	K
SCRI_RS_219043	1H	48.5127	1H	50	H	M	K	W	W	W	W	K	K	K	K	K	K	K	K	K	K	K	K	K	K	K	K	K	K	K	K	K	K	K	K	K	K	K	K	K	K	K	K	K	K	K	K	K	K
SCRI_RS_160466	1H	48.5127	1H	50	H	W	K	W	W	W	W	K	K	K	K	K	K	K	K	K	K	K	K	K	K	K	K	K	K	K	K	K	K	K	K	K	K	K	K	K	K	K	K	K	K	K	K	K	K
SCRI_RS_189920	1H	48.5127	1H	50	M	W	K	W	W	W	W	K	K	K	K	K	K	K	K	K	K	K	K	K	K	K	K	K	K	K	K	K	K	K	K	K	K	K	K	K	K	K	K	K	K	K	K	K	K
SCRI_RS_229932	1H	48.5127	1H	50	H	W	K	W	W	W	W	K	K	K	K	K	K	K	K	K	K	K	K	K	K	K	K	K	K	K	K	K	K	K	K	K	K	K	K	K	K	K	K	K	K	K	K	K	K
SCRI_RS_151874	1H	48.5127	-	-	H	W	K	W	W	W	W	K	K	K	K	K	K	K	K	K	K	K	K	K	K	K	K	K	K	K	K	K	K	K	K	K	K	K	K	K	K	K	K	K	K	K	K	K	K
BOPA1_4793-777	1H	48.5836	1H	50	H	W	K	W	W	W	W	K	K	K	K	K	K	K	K	K	K	K	K	K	K	K	K	K	K	K	H	K	K	K	K	K	K	K	K	K	K	K	K	K	K	K	K	K	K
SCRI_RS_125407	1H	48.5836	1H	50	H	W	K	W	W	W	W	K	K	K	K	K	K	K	K	K	K	K	K	K	K	K	K	K	K	K	K	K	K	K	K	K	K	K	K	K	K	K	K	K	K	K	K	K	K
BOPA2_12_30350	1H	48.796	1H	50.1	H	W	K	W	W	W	W	K	K	K	K	K	K	K	K	K	K	K	K	K	K	K	K	K	K	K	H	K	K	K	K	K	K	K	K	K	K	K	K	K	K	K	K	K	K
BOPA2_12_30110	1H	48.9377	1H	50.3	H	W	K	W	W	K	W	K	K	K	K	K	K	K	K	K	K	K	K	K	K	K	K	K	K	K	H	K	K	K	K	K	K	K	K	K	K	K	K	K	K	K	K	K	K
BOPA2_12_30694	1H	48.9377	1H	50.3	H	W	K	W	W	K	W	K	K	K	K	K	K	K	K	K	K	K	K	K	K	K	K	K	K	K	H	K	K	K	K	K	K	K	K	K	K	K	K	K	K	K	K	K	K
BOPA1_3689-1101	1H	49.0793	1H	50.5	H	W	K	W	W	K	W	K	K	K	K	K	K	K	K	K	K	K	K	K	K	K	K	K	K	K	H	K	K	K	K	K	K	K	K	K	K	K	K	K	K	K	K	K	K
BOPA2_12_30406	1H	49.0793	1H	50.5	H	W	K	W	W	K	W	K	K	K	K	K	K	K	K	K	K	K	K	K	K	K	K	K	K	K	H	K	K	K	K	K	K	K	K	K	K	K	K	K	K	K	K	K	K
SCRI_RS_17256	1H	49.0793	1H	50.36	H	M	K	W	W	K	W	K	K	K	K	K	K	K	K	K	K	K	K	K	K	K	K	K	K	K	H	K	K	K	K	K	K	K	K	K	K	K	K	K	K	K	K	K	K
SCRI_RS_118168	1H	49.0793	1H	50.36	H	W	K	W	W	K	W	K	K	K	K	K	K	K	K	K	K	K	K	K	K	K	K	K	K	K	H	K	K	K	K	K	K	K	K	K	K	K	K	K	K	K	K	K	K
SCRI_RS_109060	1H	49.4334	1H	50.66	H	M	K	W	W	K	W	K	K	K	K	K	K	K	K	K	K	K	K	K	K	K	K	K	K	K	H	K	K	K	K	K	K	K	K	K	K	K	K	K	K	K	K	K	K
BOPA1_7284-710	1H	49.5751	1H	50.86	H	M	K	W	W	K	W	K	K	K	K	K	K	K	K	K	K	K	K	K	K	K	K	K	K	K	H	K	K	K	K	K	K	K	K	K	K	K	K	K	K	K	K	K	K
BOPA1_8743-197	1H	50.4249	1H	50.86	H	H	K	W	W	K	W	K	K	K	K	K	K	K	K	K	K	K	K	K	K	K	K	K	K	K	H	K	K	K	K	K	K	K	K	K	K	K	K	K	K	K	K	K	K
BOPA2_12_30672	1H	50.4249	1H	50.99	M	H	K	W	W	K	W	K	K	K	K	K	K	K	K	K	K	K	K	K	K	K	K	K	K	K	H	K	K	K	K	K	K	K	K	K	K	K	K	K	K	K	K	K	K
BOPA2_12_30750	1H	50.4249	1H	50.99	H	H	K	W	W	K	W	K	K	K	K	K	K	K	K	K	K	K	K	K	K	K	K	K	K	K	H	K	K	K	K	K	K	K	K	K	K	K	K	K	K	K	K	K	K
BOPA2_12_30786	1H	50.4249	1H	50.99	H	H	K	W	W	K	W	K	K	K	K	K	K	K	K	K	K	K	K	K	K	K	K	K	K	K	H	K	K	K	K	K	K	K	K	K	K	K	K	K	K	K	K	K	K
SCRI_RS_119743	1H	50.4249	1H	50.99	H	H	K	W	W	K	W	K	K	K	K	K	K	K	K	K	K	K	K	K	K	K	K	K	K	K	H	K	K	K	K	K	K	K	K	K	K	K	K	K	K	K	K	K	K
BOPA2_12_30710	1H	50.8499	1H	51.86	K	H	K	W	W	K	W	K	K	W	K	K	K	K	K	K	K	K	W	K	K	K	K	K	K	K	W	K	K	K	K	K	K	K	K	K	K	K	K	K	K	K	K	K	K
SCRI_RS_167877	1H	50.8499	1H	51.28	K	H	K	W	W	K	W	K	K	K	K	K	K	K	K	K	K	K	K	K	K	K	K	K	K	K	W	K	K	K	K	K	K	K	K	K	K	K	K	K	K	K	K	K	K
SCRI_RS_56976	1H	52.2663	1H	53.1	K	H	W	W	W	K	W	K	K	W	K	K	K	K	K	K	K	K	H	K	K	W	K	K	K	K	W	K	K	K	K	K	K	K	K	K	K	K	K	K	K	K	K	K	K
SCRI_RS_156506	1H	52.5496	1H	53.3	K	H	W	W	W	K	W	K	K	W	K	K	K	K	K	K	K	K	W	K	K	W	K	K	K	K	W	K	K	K	K	K	K	K	K	K	K	K	K	K	K	K	K	K	K
SCRI_RS_1445	1H	52.6912	1H	53.5	K	H	W	W	W	K	W	K	K	W	K	K	K	K	K	K	K	K	W	K	K	W	K	K	K	K	W	K	K	K	K	K	K	K	K	K	K	K	K	K	K	K	K	K	K
SCRI_RS_207335	1H	52.6912	1H	53.5	K	H	W	W	W	K	W	K	K	W	K	K	K	K	K	K	K	K	W	K	K	W	K	K	K	K	W	K	K	K	K	K	K	K	K	K	K	K	K	K	K	K	K	K	K
SCRI_RS_193401	1H	52.6912	1H	53.5	K	H	W	W	W	K	W	K	K	W	K	K	K	K	K	K	K	K	W	K	K	W	K	K	K	K	W	K	K	K	K	K	K	K	K	K	K	K	K	K	K	K	K	K	K
SCRI_RS_100503	1H	53.2578	1H	54.1	K	H	W	W	H	K	W	K	K	W	K	K	K	K	K	K	K	K	W	K	K	W	K	K	K	K	W	K	K	K	K	K	K	K	K	K	K	K	K	K	K	K	K	K	K
SCRI_RS_165072	1H	53.4703	1H	54.3	K	H	W	W	H	K	W	K	K	W	K	K	K	K	K	K	K	K	W	K	K	W	K	K	K	K	W	K	K	K	K	K	K	K	K	K	K	K	K	K	K	K	K	K	K
SCRI_RS_138118	1H	53.4703	1H	54.3	K	H	W	W	M	K	W	K	K	W	K	K	K	K	K	K	K	K	W	K	K	W	K	K	K	K	W	K	K	K	K	K	K	K	K	K	K	K	K	K	K	K	K	K	K
SCRI_RS_201072	1H	53.4703	1H	54.3	K	H	W	W	H	K	W	K	K	W	K	K	K	K	K	K	K	K	W	K	K	W	K	K	K	K	W	K	K	K	K	K	K	K	K	K	K	K	K	K	K	K	K	K	K
SCRI_RS_213455	1H	53.6827	1H	54.5	K	H	W	W	H	K	W	K	K	W	K	K	K	K	K	K	K	K	W	K	K	W	K	K	K	K	W	K	K	K	K	K	K	K	K	K	K	K	K	K	K	K	K	K	K
SCRI_RS_145305	1H	53.6827	1H	54.5	K	H	W	W	H	K	W	K	K	W	K	K	K	K	K	K	K	K	W	K	K	W	K	K	K	K	W	K	K	K	K	K	K	K	K	K	K	K	K	K	K	K	K	K	K
SCRI_RS_225107	1H	53.6827	1H	54.5	K	H	W	W	H	K	W	K	K	W	K	K	K	K	K	K	K	K	W	K	K	W	K	K	K	K	W	K	K	K	K	K	K	K	K	K	K	K	K	K	K	K	K	K	K
SCRI_RS_121978	1H	54.3909	1H	55.2	K	H	W	K	W	K	W	K	K	W	K	K	K	K	K	K	K	K	W	K	K	K	K	K	K	K	W	K	K	K	K	K	K	K	K	K	K	K	K	K	K	K	K	K	K
SCRI_RS_152795	1H	54.8867	1H	55.7	K	H	W	K	W	K	W	K	K	W	K	K	K	K	K	K	K	K	W	K	K	K	K	K	K	K	W	K	K	K	K	K	K	K	K	K	K	K	K	K	K	K	K	K	K
BOPA1_1857-64	1H	54.8867	1H	59.01	K	H	W	K	W	K	W	K	K	W	K	K	K	K	K	K	K	K	K	K	K	K	K	K	K	K	W	K	K	K	K	K	K	K	K	K	K	K	K	K	K	K	K	K	K
SCRI_RS_122216	1H	54.8867	-	-	K	H	W	K	W	K	W	K	K	W	K	K	K	K	K	K	K	K	W	K	K	K	K	K	K	K	W	K	K	K	K	K	K	K	K	K	K	K	K	K	K	K	K	K	K
SCRI_RS_236104	1H	55.5241	1H	56.3	K	M	W	K	W	K	W	K	K	W	K	K	K	K	K	K	K	K	K	K	K	K	K	K	K	K	W	K	K	K	K	K	K	K	K	K	K	K	K	K	K	K	K	K	K
SCRI_RS_130666	1H	55.5241	1H	56.3	K	M	W	K	W	K	W	K	K	W	K	K	K	K	K	K	K	K	K	K	K	K	K	K	K	K	W	K	K	K	K	K	K	K	K	K	K	K	K	K	K	K	K	K	K
SCRI_RS_182431	1H	55.6657	1H	56.5	K	M	W	K	W	K	W	K	K	W	K	K	K	K	K	K	K	K	K	K	K	K	K	K	K	K	W	K	K	K	K	K	K	K	K	K	K	K	K	K	K	K	K	K	K
SCRI_RS_237999	1H	56.0198	1H	57.85	K	H	W	K	W	K	W	K	K	W	K	K	K	K	K	K	K	K	K	K	K	K	K	K	K	K	W	K	K	K	K	K	K	K	K	K	K	K	K	K	K	K	K	K	K
BOPA1_4178-1592	1H	57.2946	1H	59.07	K	W	W	K	W	K	W	K	K	W	K	K	K	K	K	K	K	K	K	K	K	K	K	K	K	K	W	K	K	K	K	K	K	K	K	K	K	K	K	K	K	K	K	K	K
BOPA1_5768-469	1H	57.2946	1H	59.07	K	W	W	K	W	K	W	K	K	W	K	K	K	K	K	K	K	K	K	H	K	K	K	K	K	K	W	K	K	K	K	K	K	K	K	K	K	K	K	K	K	K	K	K	K
BOPA1_ABC01838-2-2-322	1H	57.2946	1H	59.07	K	W	W	K	W	K	W	M	K	W	K	K	K	K	K	K	K	K	K	H	K	K	K	K	K	K	W	K	K	K	K	K	K	K	K	K	K	K	K	K	K	K	K	K	M
BOPA2_12_30304	1H	57.2946	1H	59.07	K	W	W	K	W	K	W	K	K	W	K	K	K	K	K	K	K	K	K	H	K	K	K	K	K	K	W	K	K	K	K	K	K	K	K	K	K	K	K	K	K	K	K	K	K
BOPA2_12_31179	1H	58.3569	1H	61.22	K	W	W	K	W	K	K	W	K	W	K	K	K	K	K	K	K	K	K	H	K	K	K	K	K	K	K	K	K	K	K	K	K	K	K	K	K	K	K	K	K	K	K	K	K
SCRI_RS_145336	1H	58.3569	1H	61.22	K	W	W	K	W	K	K	W	K	W	K	K	K	K	K	K	K	K	K	H	K	K	K	K	K	K	K	K	K	K	K	K	K	K	K	K	K	K	K	K	K	K	K	K	K
BOPA1_2877-867	1H	59.136	1H	62.26	K	W	W	K	K	K	K	W	K	W	K	K	K	K	K	K	K	K	K	W	K	K	K	K	K	K	K	K	K	K	K	K	K	K	K	K	K	K	K	K	K	K	K	K	K
SCRI_RS_194015	1H	59.136	1H	62.26	K	W	W	K	K	K	K	W	K	W	K	K	K	K	K	K	K	K	K	W	K	K	K	K	K	K	K	K	K	K	K	K	K	K	K	K	K	K	K	K	K	K	K	K	K
BOPA1_11603-445	1H	60.8357	1H	64.44	K	W	W	K	K	K	K	W	K	W	K	K	K	K	K	K	K	K	K	W	K	K	K	K	K	K	K	K	K	K	K	K	K	K	K	K	K	K	K	K	K	K	K	K	K
SCRI_RS_180349	1H	60.8357	1H	64.23	K	W	W	K	K	K	K	W	K	W	K	K	K	K	K	K	K	K	K	W	K	K	K	K	K	K	K	K	K	K	K	K	K	K	K	K	K	K	K	K	K	K	K	K	K
SCRI_RS_219685	1H	60.8357	1H	64.23	K	W	W	K	K	K	K	W	K	W	K	K	K	K	K	K	K	K	K	W	K	K	K	K	K	K	K	K	K	K	K	K	K	K	K	K	K	K	K	K	K	K	K	K	K
SCRI_RS_85391	1H	60.8357	1H	64.23	K	W	W	K	K	K	K	W	K	W	K	K	K	K	K	K	K	K	K	W	K	K	K	K	K	K	K	K	K	K	K	K	K	K	K	K	K	K	K	K	K	K	K	K	K
SCRI_RS_151228	1H	60.8357	-	-	K	W	W	K	K	K	K	W	K	W	K	K	K	K	K	K	K	K	K	W	K	K	K	K	K	K	K	K	K	K	K	K	K	K	K	K	K	K	K	K	K	K	K	K	K
SCRI_RS_204611	1H	60.8357	-	-	K	W	W	K	K	K	K	W	K	W	K	K	K	K	K	K	K	K	K	W	K	K	K	K	K	K	K	K	K	K	K	K	K	K	K	K	K	K	K	K	K	K	K	K	K
SCRI_RS_188820	1H	60.8357	-	-	K	W	W	K	K	K	K	W	K	W	K	K	K	K	K	K	K	K	K	W	K	K	K	K	K	K	K	K	K	K	K	K	K	K	K	K	K	K	K	K	K	K	K	K	K
SCRI_RS_160500	1H	60.8357	-	-	K	W	W	K	K	K	K	W	K	W	K	K	K	K	K	K	K	K	K	W	K	K	K	K	K	K	K	K	K	K	K	K	K	K	K	K	K	K	K	K	K	K	K	K	K
SCRI_RS_116661	1H	60.8357	-	-	K	W	W	K	K	K	K	W	K	W	K	K	K	K	K	K	K	K	K	W	K	K	K	K	K	K	K	K	K	K	K	K	K	K	K	K	K	K	K	K	K	K	K	K	K
BOPA1_10070-1435	1H	61.4731	1H	64.93	K	W	W	K	K	K	K	W	K	W	K	K	K	K	K	K	K	K	K	W	K	K	K	K	K	K	K	K	K	K	K	K	K	K	K	K	K	K	K	K	K	K	K	K	K
SCRI_RS_133886	1H	62.3229	1H	65.73	K	W	W	K	K	K	K	W	K	W	K	K	K	K	K	K	K	K	K	W	K	K	K	K	K	K	K	K	K	K	K	K	K	K	K	K	K	K	K	K	K	K	K	K	K
SCRI_RS_157039	1H	62.8187	1H	66.23	K	K	K	K	K	K	K	W	K	W	K	K	K	K	K	K	K	K	K	K	K	K	K	K	K	K	K	K	K	K	K	K	K	K	K	K	K	K	K	K	K	K	K	K	K
SCRI_RS_159201	1H	66.1473	1H	69.73	K	K	K	K	K	K	K	W	K	W	K	K	K	K	K	K	K	K	K	K	W	K	W	K	K	K	K	K	K	K	K	K	K	K	K	K	K	K	K	K	K	K	K	K	K
BOPA1_2036-1027	1H	66.289	1H	69.73	K	K	K	K	K	K	K	W	K	W	K	K	K	K	K	K	K	K	K	K	W	K	W	K	K	K	K	K	K	K	K	K	K	K	K	K	K	K	K	K	K	K	K	K	K
BOPA1_1670-369	1H	67.1388	1H	71.7	K	K	K	K	K	K	K	W	K	W	K	K	K	K	K	K	K	K	K	K	W	K	W	K	K	K	K	K	K	K	K	K	K	K	K	K	K	K	K	K	K	K	K	K	K
BOPA1_4665-882	1H	67.9178	1H	72.86	K	K	K	K	K	K	K	W	K	W	K	K	K	K	K	K	K	K	K	K	W	K	W	K	K	K	K	K	K	K	K	K	K	K	K	K	K	K	K	K	K	K	K	K	K
SCRI_RS_188360	1H	70.255	1H	72.86	K	K	K	K	K	K	K	W	K	W	K	K	K	K	K	K	K	K	K	K	W	K	W	K	K	K	K	K	K	K	K	K	K	K	K	K	K	K	K	K	K	K	K	K	K
BOPA2_12_30147	1H	70.255	-	-	K	K	K	K	K	K	K	W	K	W	K	K	K	K	K	K	K	K	K	K	W	K	W	K	K	K	K	K	K	K	K	K	K	K	K	K	K	K	K	K	K	K	K	K	K
SCRI_RS_151244	1H	70.255	-	-	K	K	K	K	K	K	K	W	K	W	K	K	K	K	K	K	K	K	K	K	W	K	W	K	K	K	K	K	K	K	K	K	K	K	K	K	K	K	K	K	K	K	K	K	K
SCRI_RS_823	1H	70.255	-	-	K	K	K	K	K	K	K	W	K	W	K	K	K	K	K	K	K	K	K	K	W	K	W	K	K	K	K	K	K	K	K	K	K	K	K	K	K	K	K	K	K	K	K	K	K
SCRI_RS_160234	1H	70.5382	1H	72.86	K	K	K	K	K	K	K	W	K	W	K	K	K	K	K	K	K	K	K	K	W	K	W	K	K	K	K	K	K	K	K	K	K	K	K	K	K	K	K	K	K	K	K	K	K
BOPA1_1016-376	1H	71.034	1H	72.86	K	K	K	K	K	K	K	W	K	W	K	K	K	K	K	K	K	K	K	K	W	K	W	K	K	K	K	K	K	K	K	K	K	K	K	K	K	K	K	K	K	K	K	K	K
SCRI_RS_181239	1H	71.1756	1H	73.06	K	K	K	K	K	K	K	W	K	W	K	K	K	K	K	K	K	K	K	K	W	K	W	K	K	K	K	K	K	K	K	K	K	K	K	K	K	K	K	K	K	K	K	K	K
SCRI_RS_196439	1H	71.1756	-	-	K	K	K	K	K	K	K	W	K	W	K	K	K	K	K	K	K	K	K	K	W	K	W	K	K	K	K	K	K	K	K	K	K	K	K	K	K	K	K	K	K	K	K	K	K
SCRI_RS_169123	1H	71.1756	-	-	K	K	K	K	K	K	K	W	K	W	K	K	K	K	K	K	K	K	K	K	W	K	W	K	K	K	K	K	K	K	K	K	K	K	K	K	K	K	K	K	K	K	K	K	K
SCRI_RS_156208	1H	72.3796	1H	73.59	K	K	K	K	K	K	K	W	K	W	K	K	K	K	K	K	K	K	K	K	W	K	W	K	K	K	K	K	K	K	K	K	K	K	K	K	K	K	K	K	K	K	K	K	K
BOPA1_713-972	1H	72.3796	1H	72.86	K	K	K	K	K	K	K	W	K	K	K	K	K	K	K	K	K	K	K	K	W	K	W	K	K	K	K	K	K	K	K	K	K	K	K	K	K	K	K	K	K	K	K	K	K
SCRI_RS_219726	1H	72.3796	-	-	K	K	K	K	K	K	K	W	K	K	K	K	K	K	K	K	K	K	K	K	W	K	W	K	K	K	K	K	K	K	K	K	K	K	K	K	K	K	K	K	K	K	K	K	K
SCRI_RS_181353	1H	76.8414	1H	78.25	K	K	K	K	K	K	K	W	K	K	K	K	K	K	K	K	K	K	K	K	W	K	W	K	K	K	K	K	K	K	K	K	K	K	K	K	K	K	K	K	K	K	K	K	K
SCRI_RS_125339	1H	80.2408	1H	81.65	K	K	K	K	K	K	K	W	K	K	K	K	K	K	K	K	K	K	K	K	K	K	K	K	K	K	K	K	K	K	K	K	K	K	K	K	K	K	K	K	K	K	K	K	K
BOPA1_2881-935	1H	81.728	1H	83.15	K	K	K	K	K	K	K	K	K	K	K	K	K	K	K	K	K	K	K	K	K	K	K	K	K	K	K	K	K	K	K	K	K	K	K	K	K	K	K	K	K	K	K	K	K
BOPA1_6250-1056	1H	82.6487	1H	83.95	K	K	K	K	K	K	K	K	W	K	K	K	K	K	K	K	K	K	K	K	K	K	K	K	K	K	K	K	K	K	K	K	K	K	K	K	K	K	K	K	K	K	K	K	K
SCRI_RS_135092	1H	83.5694	1H	85.05	K	K	K	K	K	K	K	K	W	K	K	K	K	K	K	M	K	K	K	K	K	K	K	K	K	K	K	K	M	K	K	K	K	K	M	K	M	K	K	K	K	K	K	K	K
SCRI_RS_236576	1H	83.711	1H	85.15	K	K	K	K	K	K	K	K	W	K	K	K	K	K	K	K	K	K	K	K	K	K	K	K	K	K	K	K	K	K	K	K	K	K	K	K	K	K	K	K	K	K	K	K	K
SCRI_RS_157246	1H	83.711	1H	85.15	K	K	K	K	K	K	K	K	W	K	K	K	K	K	K	K	K	K	K	K	K	K	K	K	K	K	K	K	K	K	K	K	K	K	K	K	K	K	K	K	K	K	K	K	K
SCRI_RS_181300	1H	83.711	-	-	K	K	K	K	K	K	K	K	W	M	K	K	K	K	K	M	K	K	K	M	K	K	K	M	M	K	K	K	K	M	K	K	K	M	K	K	K	K	K	K	K	K	K	K	K
SCRI_RS_236623	1H	85.9773	1H	88.54	K	K	K	K	K	K	K	K	W	K	K	K	K	K	K	K	K	K	K	K	K	K	K	K	K	K	K	K	K	K	K	K	K	K	K	K	K	K	K	K	K	K	K	K	K
SCRI_RS_182326	1H	86.4731	-	-	K	K	K	K	K	K	K	K	W	K	K	K	K	K	K	K	K	K	K	K	K	K	K	K	K	K	K	K	K	K	K	K	K	K	K	K	K	K	K	K	K	K	K	K	K
BOPA1_9757-582	1H	86.8272	1H	89.34	K	K	K	K	K	K	K	K	W	K	K	K	K	K	K	K	K	K	K	K	K	K	K	K	K	K	K	K	K	K	K	K	K	K	K	K	K	K	K	K	K	K	K	K	K
SCRI_RS_209524	1H	86.8272	1H	89.34	K	K	K	K	K	K	K	K	W	K	K	K	K	K	K	K	K	K	K	K	K	K	K	K	K	K	K	K	K	K	K	K	K	K	K	K	K	K	K	K	K	K	K	K	K
BOPA1_3201-603	1H	86.9688	1H	89.34	K	K	K	K	K	K	K	K	W	K	K	K	K	K	K	K	K	K	K	K	K	K	K	K	K	K	K	K	K	K	K	K	K	K	K	K	K	K	K	K	K	K	K	K	K
SCRI_RS_189168	1H	87.5354	1H	90.04	K	K	K	K	K	K	K	K	W	K	K	K	K	K	K	K	K	K	K	K	K	K	K	K	K	K	K	K	K	K	K	K	K	K	K	K	K	K	K	K	K	K	K	K	K
BOPA1_8867-459	1H	88.2436	1H	90.98	K	K	K	K	K	K	K	K	W	K	K	K	K	K	K	K	K	K	K	K	K	K	K	K	K	K	K	K	K	K	K	K	K	K	K	K	K	K	K	K	K	K	K	K	K
SCRI_RS_197263	1H	88.881	1H	92.5	K	K	K	K	K	K	K	K	W	K	K	K	K	K	K	K	K	K	K	K	K	K	K	K	K	K	K	K	K	K	K	K	K	K	K	K	K	K	K	K	K	K	K	K	K
BOPA2_12_31163	1H	89.0227	1H	92.6	K	K	K	K	K	K	K	K	W	K	K	K	K	K	K	K	K	K	K	K	K	K	K	K	K	K	K	K	K	K	K	K	K	K	K	K	K	K	K	K	K	K	K	K	K
SCRI_RS_188218	1H	89.3059	1H	93.35	M	M	K	K	K	K	K	K	W	K	K	K	M	M	M	K	K	M	K	K	M	K	M	K	K	M	K	K	M	K	M	K	K	K	K	K	M	M	K	K	K	K	K	M	K
SCRI_RS_213675	1H	90.1558	1H	94.25	K	K	K	K	K	K	K	K	W	K	K	K	K	K	K	K	K	K	K	K	K	K	K	K	K	K	K	K	K	K	K	K	K	K	K	K	K	K	K	K	K	K	K	K	K
BOPA1_2935-1634	1H	90.2975	1H	94.48	K	K	K	K	K	K	K	K	W	K	K	K	K	K	K	K	K	K	K	K	K	K	K	K	K	K	K	K	K	K	K	K	K	K	K	K	K	K	K	K	K	K	K	K	K
BOPA2_12_31192	1H	90.4391	1H	94.48	K	K	K	K	K	K	K	K	W	K	K	K	K	K	K	K	K	K	K	K	K	K	K	K	K	K	K	K	K	K	K	K	K	K	K	K	K	K	K	K	K	K	K	K	K
SCRI_RS_194371	1H	92.2096	1H	96.25	K	K	K	K	K	K	K	K	W	K	K	K	K	K	K	K	K	K	K	K	K	K	K	K	K	K	K	K	K	K	K	K	K	K	K	K	K	K	K	K	K	K	K	K	K
BOPA2_12_31319	1H	92.3513	1H	96.25	K	K	K	K	K	K	K	K	W	K	K	K	K	K	K	K	K	K	K	K	K	K	K	K	K	K	K	K	K	K	K	K	K	K	K	K	K	K	K	K	K	K	K	K	K
SCRI_RS_199689	1H	92.4929	1H	96.55	K	K	K	K	K	K	K	K	W	K	K	K	K	K	K	K	K	K	K	K	K	K	K	K	K	K	K	K	K	K	K	K	K	K	K	K	K	K	K	K	K	K	K	K	K
SCRI_RS_130139	1H	93.0595	1H	97.15	K	K	K	K	K	K	K	K	W	K	K	K	K	K	K	K	K	K	K	K	K	K	K	K	K	K	K	K	K	K	K	K	K	K	K	K	K	K	K	K	K	K	K	K	K
SCRI_RS_145026	1H	93.0595	1H	97.15	K	K	K	K	K	K	K	K	W	K	K	K	K	K	K	K	K	K	K	K	K	K	K	K	K	K	K	K	K	K	K	K	K	K	K	K	K	K	K	K	K	K	K	K	K
SCRI_RS_136856	1H	95.6091	1H	99.15	K	K	K	K	K	K	K	K	W	K	K	K	K	K	K	K	K	K	K	K	K	K	K	K	K	K	K	K	K	K	K	K	K	K	K	K	K	K	K	K	K	K	K	K	K
SCRI_RS_213539	1H	95.6091	-	-	K	K	K	K	K	K	K	K	W	K	K	K	K	K	K	K	K	K	K	K	K	K	K	K	K	K	K	K	K	K	K	K	K	K	K	K	K	K	K	K	K	K	K	K	K
SCRI_RS_199972	1H	95.6091	-	-	K	K	K	K	K	K	K	K	W	K	K	K	K	K	K	K	K	K	K	K	K	K	K	K	K	K	K	K	K	K	K	K	K	K	K	K	K	K	K	K	K	K	K	K	K
SCRI_RS_78578	1H	95.6091	-	-	K	K	K	K	K	K	K	K	W	K	K	K	K	K	K	K	K	K	K	K	K	K	K	K	K	K	K	K	K	K	K	K	K	M	K	K	K	K	K	K	K	K	K	K	K
SCRI_RS_154646	1H	95.6091	-	-	K	K	K	K	K	K	K	K	W	K	K	K	K	K	K	K	K	K	K	K	K	K	K	K	K	K	K	K	K	K	K	K	K	K	K	K	K	K	K	K	K	K	K	K	K
BOPA1_2711-234	1H	95.8924	1H	99.45	K	K	K	K	K	K	K	K	W	K	K	K	K	K	K	K	K	K	K	K	K	K	K	K	K	K	K	K	K	K	K	K	K	K	K	K	K	K	K	K	K	K	K	K	K
SCRI_RS_236160	1H	97.7337	-	-	K	K	K	K	K	K	K	K	W	K	K	K	K	K	K	K	K	K	K	K	K	K	K	K	K	K	K	K	K	K	K	K	K	K	K	K	K	K	K	K	K	K	K	K	K
BOPA1_1497-628	1H	97.9462	1H	101.05	K	K	K	K	K	K	K	K	W	K	K	K	K	K	K	K	K	K	K	K	K	K	K	K	K	K	K	K	K	K	K	K	K	K	K	K	K	K	K	K	K	K	K	K	K
BOPA1_1923-265	1H	97.9462	1H	105.52	K	K	K	K	K	K	K	K	W	K	K	K	K	K	K	K	K	K	K	K	K	K	K	K	K	K	K	K	K	K	K	K	K	K	K	K	K	K	K	K	K	K	K	K	K
BOPA1_1625-303	1H	100.779	1H	109.53	K	K	K	H	K	K	K	K	W	W	K	K	K	K	K	K	K	K	K	K	K	K	K	K	K	K	K	K	K	K	K	K	K	K	K	K	K	K	K	K	K	K	K	K	K
SCRI_RS_197337	1H	100.779	1H	109.53	K	K	K	M	K	K	K	K	W	W	K	K	K	K	K	K	K	K	K	K	K	K	K	K	K	K	K	K	K	K	K	K	K	K	K	K	K	K	K	K	K	K	K	K	K
SCRI_RS_161388	1H	100.779	1H	109.53	K	K	K	K	K	K	K	K	W	W	K	K	K	K	K	K	K	K	K	K	K	K	K	K	K	K	K	K	K	K	K	K	K	K	K	K	K	K	K	K	K	K	K	K	K
BOPA1_10360-563	1H	101.062	1H	109.83	K	K	K	H	K	K	K	K	W	W	K	K	K	K	K	K	K	K	K	K	K	K	K	K	K	K	K	K	K	K	K	K	K	K	K	K	K	K	K	K	K	K	K	K	K
BOPA1_5690-1045	1H	103.399	1H	114.98	K	K	K	W	K	K	K	K	W	W	K	K	K	K	K	K	K	K	K	K	K	K	K	K	K	K	K	K	K	K	K	K	K	K	K	K	K	K	K	K	K	K	K	K	K
SCRI_RS_139733	1H	103.824	1H	113.57	K	K	K	W	K	K	K	K	W	W	K	K	K	K	K	K	K	K	K	K	K	K	K	K	K	K	K	K	K	K	K	K	K	K	K	K	K	K	K	K	K	K	K	K	K
SCRI_RS_218473	1H	103.824	1H	113.57	K	K	K	W	K	K	K	K	W	W	K	K	K	K	K	M	K	K	K	K	K	K	K	K	K	K	K	K	K	K	K	K	K	K	K	K	K	K	K	K	K	K	K	K	K
SCRI_RS_91596	1H	103.824	1H	113.57	K	K	K	W	K	K	K	K	W	W	K	K	K	K	K	K	K	K	K	K	K	K	K	K	K	K	K	K	K	K	K	K	K	K	K	K	K	K	K	K	K	K	K	K	K
SCRI_RS_238125	1H	104.249	1H	114.3	K	K	K	W	K	K	K	K	W	W	K	K	K	K	K	K	K	K	K	K	K	K	K	K	K	K	K	K	K	K	K	K	K	K	K	K	K	K	K	K	K	K	K	K	K
SCRI_RS_155997	1H	104.745	1H	114.8	K	K	K	M	K	K	K	K	M	M	K	K	K	K	K	K	K	K	K	K	K	K	K	K	K	K	K	K	K	K	K	K	K	K	K	K	K	K	K	K	K	K	K	K	K
BK_01	1H	104.816	-	-	K	K	K	W	K	K	K	K	W	W	K	K	K	K	K	K	K	K	K	K	K	K	K	H	K	K	K	K	K	K	K	K	K	K	K	K	K	K	K	K	K	K	K	K	K
SCRI_RS_157953	1H	106.161	1H	116.3	K	K	K	W	K	K	K	K	W	W	K	K	K	K	K	K	K	K	K	K	K	K	K	H	K	K	K	K	K	K	K	K	K	K	K	K	K	K	K	K	K	K	K	K	K
SCRI_RS_224392	1H	112.252	1H	122.4	K	K	K	K	K	K	K	K	W	W	K	K	K	K	K	K	K	K	K	K	K	H	K	H	K	K	K	K	K	K	K	K	K	K	K	K	K	K	K	K	K	K	K	K	K
SCRI_RS_127646	1H	116.289	1H	126.4	K	K	K	K	K	K	K	K	K	W	K	K	K	K	K	K	K	K	K	K	K	H	K	H	K	K	K	K	K	K	K	K	K	K	K	K	K	K	K	K	K	K	K	K	K
BOPA1_ConsensusGBS0687-3	1H	116.501	1H	126.6	K	K	K	K	K	K	K	K	K	W	K	K	K	K	K	K	K	K	K	K	K	H	K	H	K	K	K	K	K	K	K	K	K	K	K	K	K	K	K	K	K	K	K	K	K
SCRI_RS_201865	1H	116.785	1H	126.9	K	K	K	K	K	K	K	K	K	W	K	K	K	K	K	K	K	K	K	K	K	H	K	H	K	K	K	K	K	K	K	K	K	K	K	K	K	K	K	K	K	K	K	K	K
SCRI_RS_147611	1H	118.343	1H	128.4	K	K	K	K	K	K	K	K	K	W	K	K	K	K	K	K	K	K	K	K	K	H	K	H	K	K	K	K	K	K	K	K	K	K	K	K	K	K	K	K	K	K	K	K	K
SCRI_RS_155758	1H	118.484	1H	128.45	K	K	K	K	K	K	K	K	K	W	K	K	K	K	K	K	K	K	K	K	K	H	K	H	K	K	K	K	K	K	K	K	K	K	K	K	K	K	K	K	K	K	K	K	K
SCRI_RS_165588	1H	118.98	1H	128.92	K	K	K	K	K	K	K	K	K	W	K	K	K	K	K	K	K	K	K	K	K	H	K	H	K	K	K	K	K	K	K	K	K	K	K	K	K	K	K	K	K	K	K	K	K
SCRI_RS_189967	1H	119.122	1H	129.42	K	K	K	K	K	K	K	K	K	W	K	K	K	K	K	K	K	K	K	K	K	H	K	H	K	K	K	K	K	K	K	K	K	K	K	K	K	K	K	K	K	K	K	K	K
BOPA2_12_10207	1H	119.405	1H	129.14	K	K	K	K	K	K	K	K	K	W	K	K	K	K	K	K	K	K	K	K	K	H	K	H	K	K	K	K	K	K	K	K	K	K	K	K	K	K	K	K	K	K	K	K	K
SCRI_RS_169881	1H	122.096	1H	132.64	K	K	K	K	K	K	K	K	K	W	W	K	K	K	K	K	K	K	K	K	K	H	K	H	K	K	K	K	K	K	K	K	K	K	K	K	K	K	K	K	K	K	K	K	K
SCRI_RS_207416	1H	125.992	1H	136.65	K	K	K	K	K	K	K	K	K	W	W	K	K	K	K	K	K	K	K	K	K	H	K	H	K	K	K	K	K	K	K	K	K	K	K	K	K	K	K	K	K	K	K	K	K
SCRI_RS_138629	1H	125.992	-	-	K	K	K	K	K	K	K	K	K	W	W	K	K	K	K	K	K	K	K	K	K	H	K	H	K	K	K	K	K	K	K	K	K	K	K	K	K	K	K	K	K	K	K	K	K
SCRI_RS_180081	1H	125.992	-	-	K	K	K	K	K	K	K	K	K	W	W	K	K	K	K	K	K	K	K	K	K	H	K	H	K	K	K	K	K	K	K	K	K	K	K	K	K	K	K	K	K	K	K	K	K
SCRI_RS_150563	1H	125.992	-	-	K	K	K	K	K	K	K	K	K	W	W	K	K	K	K	K	K	K	K	K	K	H	K	H	K	K	K	K	K	K	K	K	K	K	K	K	K	K	K	K	K	K	K	K	K
SCRI_RS_165338	1H	125.992	-	-	K	K	K	K	K	K	K	K	K	W	W	K	K	K	K	K	K	K	K	K	K	H	K	H	K	K	K	K	K	K	K	K	K	K	K	K	K	K	K	K	K	K	K	K	K
SCRI_RS_182206	1H	128.045	1H	138.65	K	K	K	K	K	K	K	K	K	W	W	K	K	K	K	K	K	K	K	K	K	H	K	H	K	K	K	K	K	K	K	K	K	K	K	K	K	K	K	K	K	K	K	K	K
SCRI_RS_184058	1H	128.045	1H	138.65	K	K	K	K	K	K	K	K	K	W	W	K	K	K	K	K	K	K	K	K	K	M	K	H	K	K	K	K	K	K	K	K	K	K	K	K	K	K	K	K	K	K	K	K	K
SCRI_RS_150786	1H	128.329	1H	138.95	K	K	K	K	K	K	K	K	K	W	W	K	K	K	K	K	K	K	K	K	K	H	K	H	K	K	K	K	K	K	K	K	K	K	K	K	K	K	K	K	K	K	K	K	K
SCRI_RS_10956	1H	128.329	1H	138.95	K	K	K	K	K	K	K	K	K	W	W	K	K	K	K	K	K	K	K	K	K	H	K	H	K	K	K	K	K	K	K	K	K	K	K	K	K	K	K	K	K	K	K	K	K
SCRI_RS_166469	1H	130.737	-	-	K	K	K	K	K	K	K	K	K	W	W	K	K	K	K	K	K	K	K	K	K	H	K	H	K	K	K	K	K	K	K	K	K	K	K	K	K	K	K	K	K	K	K	K	K
SCRI_RS_155407	1H	130.737	-	-	K	K	K	K	K	K	K	K	K	W	W	K	K	K	K	K	K	K	K	K	K	H	K	H	K	K	K	K	K	K	K	K	K	K	K	K	K	K	K	K	K	K	K	K	K
BOPA1_ABC05061-1-1-159	1H	130.807	1H	142.16	K	K	K	K	K	K	K	K	K	W	W	K	K	K	K	K	K	K	K	K	K	H	K	H	K	K	K	K	K	K	K	K	K	K	K	K	K	K	K	K	K	K	K	K	K
SCRI_RS_141322	1H	130.807	-	-	K	K	K	K	K	K	K	K	K	W	W	K	K	K	K	K	K	K	K	K	K	H	K	H	K	K	K	K	K	K	K	K	K	K	K	K	K	K	K	K	K	K	K	K	K
BOPA1_13095-187	1H	131.941	1H	142.74	K	K	K	K	K	K	K	K	K	K	W	K	K	K	K	K	K	K	K	K	K	K	K	H	K	K	K	K	K	K	K	K	K	K	K	K	K	K	K	K	K	K	K	K	K
SCRI_RS_4928	1H	131.941	1H	142.54	K	K	K	K	K	K	K	K	K	K	W	K	K	K	K	K	K	K	K	K	K	K	K	H	K	K	K	K	K	K	K	K	K	K	K	K	K	K	K	K	K	K	K	K	K
SCRI_RS_176006	1H	132.082	1H	142.74	K	K	K	K	K	K	K	K	K	K	W	K	K	K	K	K	K	K	K	K	K	K	K	H	K	K	K	K	K	K	K	K	K	K	K	K	K	K	K	K	K	K	K	K	K
BOPA2_12_31081	1H	132.365	1H	145.82	K	K	K	K	K	K	K	K	K	K	W	K	K	K	K	K	K	K	K	K	K	K	K	H	K	K	K	K	K	K	K	K	K	K	K	K	K	K	K	K	K	K	K	K	K
BOPA2_12_30231	1H	132.507	1H	142.74	K	K	K	K	K	K	K	K	K	K	W	K	K	K	K	K	K	K	K	K	K	K	K	H	K	K	K	K	K	K	K	K	K	K	K	K	K	K	K	K	K	K	K	K	K
SCRI_RS_117283	1H	132.507	1H	142.74	K	K	K	K	K	K	K	K	K	K	W	K	K	K	K	K	K	K	K	K	K	K	K	H	K	K	K	K	K	K	K	K	K	K	K	K	K	K	K	K	K	K	K	K	K
SCRI_RS_167999	1H	132.507	-	-	K	K	K	K	K	K	K	K	K	K	W	K	K	K	K	K	K	K	K	K	K	K	K	M	K	K	K	K	K	K	K	K	K	K	K	K	K	K	K	K	K	K	K	K	K
SCRI_RS_175218	1H	132.578	1H	142.74	K	K	K	K	K	K	K	K	K	K	W	K	K	K	K	K	K	K	K	K	K	K	K	H	K	K	K	K	K	K	K	K	K	K	K	K	K	K	K	K	K	K	K	K	K
BOPA1_4592-118	1H	132.72	1H	142.74	K	K	K	K	K	K	K	K	K	K	W	K	K	K	K	K	K	K	K	K	K	K	K	H	K	K	K	K	K	K	K	K	K	K	K	K	K	K	K	K	K	K	K	K	K
SCRI_RS_187638	2H	0	2H	5.99	K	K	K	K	W	W	K	K	K	K	K	K	K	K	K	K	K	K	K	K	K	K	K	K	K	K	K	K	K	K	K	K	K	K	K	K	K	K	K	K	K	K	K	K	K
SCRI_RS_146936	2H	0	-	-	K	K	K	K	W	W	K	K	K	K	K	K	K	K	K	K	K	K	K	K	K	K	K	K	K	K	K	K	K	K	K	K	K	K	K	K	K	K	K	K	K	K	K	K	K
SCRI_RS_136200	2H	2.26629	2H	8.29	K	K	K	K	W	W	K	K	K	K	K	K	K	K	K	K	K	K	K	K	K	K	K	K	K	K	K	K	K	K	K	K	K	K	K	K	K	K	K	K	K	K	K	K	K
SCRI_RS_173486	2H	2.26629	2H	8.29	K	K	K	K	W	W	K	K	K	K	K	K	K	K	K	K	K	K	K	K	K	K	K	K	K	K	K	K	K	K	K	K	K	K	K	K	K	K	K	K	K	K	K	K	K
SCRI_RS_128813	2H	2.26629	-	-	K	K	K	K	W	W	K	K	K	K	K	K	K	K	K	K	K	K	K	K	K	K	K	K	K	K	K	K	K	K	K	K	K	K	K	K	K	K	K	K	K	K	K	K	K
SCRI_RS_148734	2H	2.26629	-	-	K	K	K	K	W	W	K	K	K	K	K	K	K	K	K	K	K	K	K	K	K	K	K	K	K	K	K	K	K	K	K	K	K	K	K	K	K	K	K	K	K	K	K	K	K
SCRI_RS_186847	2H	2.26629	-	-	K	K	K	K	W	W	K	K	K	K	K	K	K	K	K	K	K	K	K	K	K	K	K	K	K	K	K	K	K	K	K	K	K	K	K	K	K	K	K	K	K	K	K	K	K
SCRI_RS_10642	2H	3.82436	2H	9.79	K	K	K	K	W	W	K	K	K	K	K	K	K	K	K	K	K	K	K	K	K	K	K	K	K	K	K	K	K	K	K	K	K	K	K	K	K	K	K	K	K	K	K	K	K
BOPA2_12_30132	2H	3.82436	-	-	K	K	K	K	W	W	K	K	K	K	K	K	K	K	K	K	K	K	K	K	K	K	K	K	K	K	K	K	K	K	K	K	K	K	K	K	K	K	K	K	K	K	K	K	K
SCRI_RS_174552	2H	3.82436	-	-	K	K	K	K	W	W	K	K	K	K	K	K	K	K	K	K	K	K	K	K	K	K	K	K	K	K	K	K	K	K	K	K	K	K	K	K	K	K	K	K	K	K	K	K	K
SCRI_RS_167823	2H	3.82436	-	-	K	K	K	K	W	W	K	K	K	K	K	K	K	K	K	K	K	K	K	K	K	K	K	K	K	K	K	K	K	K	K	K	K	K	K	K	K	K	K	K	K	K	K	K	K
SCRI_RS_184899	2H	4.24929	-	-	K	K	K	K	W	W	K	K	K	K	K	K	K	K	K	K	K	K	K	K	K	K	K	K	K	K	K	K	K	K	K	K	K	K	K	K	K	K	K	K	K	K	K	K	K
SCRI_RS_182210	2H	5.38244	-	-	K	K	K	K	W	W	K	K	K	K	K	K	K	K	K	K	K	K	K	K	K	K	K	K	K	K	K	K	K	K	K	K	K	K	K	K	K	K	K	K	K	K	K	K	K
SCRI_RS_190048	2H	5.38244	-	-	K	K	K	K	W	W	K	K	K	K	K	K	K	K	K	K	K	K	K	K	K	K	K	K	K	K	K	K	K	K	K	K	K	K	K	K	K	K	K	K	K	K	K	K	K
SCRI_RS_227507	2H	5.38244	-	-	K	K	K	K	W	W	K	K	K	K	K	K	K	K	K	K	K	K	K	K	K	K	K	K	K	K	K	K	K	K	K	K	K	K	K	K	K	K	K	K	K	K	K	K	K
SCRI_RS_232722	2H	5.38244	-	-	K	K	K	K	W	W	K	K	K	K	K	K	K	K	K	K	K	K	K	K	K	K	K	K	K	K	K	K	K	K	K	K	K	K	K	K	K	K	K	K	K	K	K	K	K
SCRI_RS_146997	2H	5.38244	-	-	K	K	K	K	W	W	K	K	K	K	K	K	K	K	K	K	K	K	K	K	K	K	K	K	K	K	K	K	K	K	K	K	K	K	K	K	K	K	K	K	K	K	K	K	K
SCRI_RS_224245	2H	5.38244	-	-	K	K	K	K	W	W	K	K	K	K	K	K	K	K	K	K	K	K	K	K	K	K	K	K	K	K	K	K	K	K	K	K	K	K	K	K	K	K	K	K	K	K	K	K	K
SCRI_RS_13476	2H	6.30312	2H	12.29	K	K	K	K	W	W	K	K	K	K	K	K	K	K	K	K	K	K	K	K	K	K	K	K	K	K	K	K	K	K	K	K	K	K	K	K	K	K	K	K	K	K	K	K	K
SCRI_RS_88391	2H	6.5864	2H	12.59	K	K	K	K	W	W	K	K	K	K	K	K	K	K	K	K	K	K	K	K	K	K	K	K	K	K	K	K	K	K	K	K	K	K	K	K	K	K	K	K	K	K	K	K	K
BOPA1_8930-370	2H	7.2238	2H	13.19	K	K	K	K	W	W	K	K	K	K	K	K	K	K	K	K	K	K	K	K	K	K	K	K	K	K	K	K	K	K	K	K	K	K	K	K	K	K	K	K	K	K	K	K	K
BOPA2_12_30424	2H	7.2238	-	-	K	K	K	K	W	W	K	K	K	K	K	K	K	K	K	K	K	K	K	K	K	K	K	K	K	K	K	K	K	K	K	K	K	K	K	K	K	K	K	K	K	K	K	K	K
SCRI_RS_164876	2H	7.2238	-	-	K	K	K	K	W	W	K	K	K	K	K	K	K	K	K	K	K	K	K	K	K	K	K	K	K	K	K	K	K	K	K	K	K	K	K	K	K	K	K	K	K	K	K	K	K
SCRI_RS_213799	2H	7.43626	2H	13.39	K	K	K	K	W	W	K	K	K	K	K	K	K	K	K	K	K	K	K	K	K	K	K	K	K	K	K	K	K	K	K	K	K	K	K	K	K	K	K	K	K	K	K	K	K
SCRI_RS_167465	2H	7.79037	2H	13.79	K	K	K	K	W	W	K	K	K	K	K	K	K	K	K	K	K	K	K	K	K	K	K	K	K	K	K	K	K	K	K	K	K	K	K	K	K	K	K	K	K	K	K	K	K
SCRI_RS_162694	2H	7.79037	-	-	K	K	K	K	W	K	K	K	K	K	K	K	K	K	K	K	K	K	K	K	K	K	K	K	K	K	K	K	K	K	K	K	K	K	K	K	K	K	K	K	K	K	K	K	K
SCRI_RS_159503	2H	8.28612	2H	14.29	K	K	K	K	W	K	K	K	K	K	K	K	K	K	K	K	K	K	K	K	K	K	K	K	K	K	K	K	K	K	K	K	K	K	K	K	K	K	K	K	K	K	K	K	K
BOPA2_12_31497	2H	8.56941	2H	15.17	K	K	K	K	W	K	K	K	K	K	K	K	K	K	K	K	K	K	K	K	K	K	K	K	K	K	K	K	K	K	K	K	K	K	K	K	K	K	K	K	K	K	K	K	K
SCRI_RS_192552	2H	8.56941	2H	15.17	K	K	K	K	W	K	K	K	K	K	K	K	K	K	K	K	K	K	K	K	K	K	K	K	K	K	K	K	K	K	K	K	K	K	K	K	K	K	K	K	K	K	K	K	K
SCRI_RS_141771	2H	8.56941	2H	15.17	K	K	K	K	W	K	K	K	K	K	K	K	K	K	K	K	K	K	K	K	K	K	K	K	K	K	K	K	K	K	K	K	K	K	K	K	K	K	K	K	K	K	K	K	K
BOPA1_3453-1974	2H	8.56941	2H	13.39	K	K	K	K	W	K	K	K	K	K	K	K	K	K	K	K	K	K	K	K	K	K	K	K	K	K	K	K	K	K	K	K	K	K	K	K	K	K	K	K	K	K	K	K	K
SCRI_RS_231057	2H	8.85269	2H	15.47	K	K	K	K	W	K	K	K	K	K	K	W	K	K	K	K	K	K	K	K	K	K	K	K	K	K	K	K	K	K	K	K	K	K	K	K	K	K	K	K	K	K	K	K	K
SCRI_RS_204158	2H	9.2068	2H	15.77	K	K	K	K	W	K	K	K	K	K	K	W	K	K	K	K	K	K	K	K	K	K	K	K	K	K	K	K	K	K	K	K	K	K	K	K	K	K	K	K	K	K	K	K	K
BOPA2_12_30155	2H	9.63173	2H	16.17	K	K	K	K	W	K	K	K	K	K	K	W	K	K	K	K	K	K	K	K	K	K	K	K	K	K	K	K	K	K	K	K	K	K	K	K	K	K	K	K	K	K	K	K	K
SCRI_RS_157480	2H	9.63173	2H	16.17	K	K	K	K	W	K	K	K	K	K	K	W	K	K	K	K	K	K	K	K	K	K	K	K	K	K	K	K	K	K	K	K	K	K	K	K	K	K	K	K	K	K	K	K	K
SCRI_RS_605	2H	9.63173	-	-	K	K	K	K	W	K	K	K	K	K	K	W	K	K	K	K	K	K	K	K	K	K	K	K	K	K	K	K	K	K	K	K	K	K	K	K	K	K	K	K	K	K	K	K	K
SCRI_RS_144545	2H	10.4816	2H	21.96	K	K	K	K	W	K	K	K	K	K	K	W	K	K	K	K	K	K	K	K	K	K	K	K	K	K	K	K	K	K	K	K	K	K	K	K	K	K	K	K	K	K	K	K	K
SCRI_RS_188511	2H	11.6147	2H	23.06	K	K	K	K	K	K	K	K	K	K	K	W	K	K	K	K	K	K	K	K	K	K	K	K	K	K	K	K	K	K	K	K	K	K	K	K	K	K	K	K	K	K	K	K	K
SCRI_RS_136287	2H	11.6147	-	-	K	K	K	K	K	K	K	K	K	K	K	W	K	K	K	K	K	K	K	K	K	K	K	K	K	K	K	K	K	K	K	K	K	K	K	K	K	K	K	K	K	K	K	K	K
SCRI_RS_159158	2H	11.6147	-	-	K	K	K	K	K	K	K	K	K	K	K	W	K	K	K	K	K	K	K	K	K	K	K	K	K	K	K	K	K	K	K	K	K	K	K	K	K	K	K	K	K	K	K	K	K
SCRI_RS_141564	2H	12.1105	2H	23.56	K	K	K	K	K	K	K	K	K	K	K	W	K	K	K	K	K	K	K	K	K	K	K	K	K	K	K	K	K	K	K	K	K	K	K	K	K	K	K	K	K	K	K	K	K
SCRI_RS_231806	2H	12.1105	2H	23.56	K	K	K	K	K	K	K	K	K	K	K	W	K	K	K	K	K	K	K	K	K	K	K	K	K	K	K	K	K	K	K	K	K	K	K	K	K	K	K	K	K	K	K	K	K
BOPA2_12_30631	2H	12.1105	2H	19.42	K	K	K	K	K	K	K	K	K	K	K	W	K	K	K	K	K	K	K	K	K	K	K	K	K	K	K	K	K	K	K	K	K	K	K	K	K	K	K	K	K	K	K	K	K
SCRI_RS_226348	2H	12.5354	2H	23.96	K	K	K	K	K	K	K	K	K	K	K	W	W	W	K	K	K	K	K	K	K	K	K	K	K	K	K	K	K	K	K	K	K	K	K	K	K	K	K	K	K	K	K	K	K
SCRI_RS_155957	2H	12.7479	2H	24.16	K	K	K	K	K	K	K	K	K	K	K	W	W	W	K	K	K	K	K	K	K	K	K	K	K	K	K	K	K	K	K	K	K	K	K	K	K	K	K	K	K	K	K	K	K
SCRI_RS_231889	2H	13.3853	2H	24.86	K	K	K	K	K	K	K	K	K	K	K	W	W	W	K	K	K	K	K	K	K	K	K	K	K	K	K	K	K	K	K	K	K	K	K	K	K	K	K	K	K	K	K	K	K
SCRI_RS_154683	2H	14.3768	2H	25.86	K	K	K	K	K	K	K	K	K	K	K	W	W	W	K	K	K	K	K	K	K	K	K	K	K	K	K	K	K	K	K	K	K	K	K	K	K	K	K	K	K	K	K	K	K
SCRI_RS_153226	2H	14.3768	2H	25.86	K	K	K	K	K	K	K	K	K	K	K	W	W	W	K	K	K	K	K	K	K	K	K	K	K	K	K	K	K	K	K	K	K	K	K	K	K	K	K	K	K	K	K	K	K
BOPA1_791-1113	2H	14.3768	2H	25.53	K	K	K	K	K	K	K	K	K	K	K	W	W	W	K	K	K	K	K	K	K	K	K	K	K	K	K	K	K	K	K	K	K	K	K	K	K	K	K	K	K	K	K	K	K
SCRI_RS_198643	2H	15.4391	2H	26.86	K	K	K	K	K	K	K	K	K	K	K	W	W	W	K	K	K	K	K	K	K	K	K	K	K	K	K	K	K	K	K	K	K	K	K	K	K	K	K	K	K	K	K	K	K
SCRI_RS_185319	2H	15.4391	-	-	K	K	K	K	K	K	K	K	K	K	K	W	W	W	K	K	K	K	K	K	K	K	K	K	K	K	K	K	K	K	K	K	K	K	K	K	K	K	K	K	K	K	K	K	K
SCRI_RS_205712	2H	17.5637	-	-	K	K	K	K	K	K	K	K	K	K	K	W	W	W	K	K	K	K	K	K	K	K	K	K	K	K	K	K	K	K	K	K	K	K	K	K	K	K	K	K	K	K	K	K	K
SCRI_RS_192386	2H	18.1303	-	-	K	K	K	K	K	K	K	K	K	K	K	K	W	W	K	K	K	K	K	K	K	K	K	K	K	K	K	K	K	K	K	K	K	K	K	K	K	K	K	K	K	K	K	K	K
SCRI_RS_233272	2H	18.9093	2H	31.74	K	K	K	K	K	K	K	K	K	K	K	K	W	W	K	K	K	K	K	K	K	K	K	K	K	K	K	K	K	K	K	K	K	K	K	K	K	K	K	K	K	K	K	K	K
SCRI_RS_131218	2H	22.1671	2H	35.04	K	K	K	K	K	K	K	K	K	K	K	K	W	W	K	K	K	K	K	K	K	K	K	K	K	K	K	K	K	K	K	K	K	K	K	K	K	K	K	K	K	K	K	K	K
SCRI_RS_188893	2H	22.1671	2H	35.04	K	K	K	K	K	K	K	K	K	K	K	K	W	W	K	K	K	K	K	K	K	K	K	K	K	K	K	K	K	K	K	K	K	K	K	K	K	K	K	K	K	K	K	K	K
SCRI_RS_170337	2H	23.017	2H	35.84	K	K	K	K	K	K	K	K	K	K	K	K	W	W	K	K	K	K	K	K	K	K	K	K	K	K	K	K	K	K	K	K	K	K	K	K	K	K	K	K	K	K	K	K	K
BOPA1_2646-1277	2H	23.1586	2H	39.69	K	K	K	K	K	K	K	K	K	K	K	K	W	W	K	K	K	K	K	K	K	K	K	K	K	K	K	K	K	K	K	K	K	K	K	K	K	K	K	K	K	K	K	K	K
SCRI_RS_186387	2H	23.1586	2H	39.69	K	K	K	K	K	K	K	K	K	K	K	K	W	W	K	K	K	K	K	K	K	K	K	K	K	K	K	K	K	K	K	K	K	K	K	K	K	K	K	K	K	K	K	K	K
SCRI_RS_183655	2H	23.1586	2H	39.69	K	K	K	K	K	K	K	K	K	K	K	K	W	W	K	K	K	K	K	K	K	K	K	K	K	K	K	K	K	K	K	K	K	K	K	K	K	K	K	K	K	K	K	K	K
SCRI_RS_192783	2H	23.1586	2H	39.69	K	K	K	K	K	K	K	K	K	K	K	K	W	W	K	K	K	K	K	K	K	K	K	K	K	K	K	K	K	K	K	K	K	K	K	K	K	K	K	K	K	K	K	K	K
SCRI_RS_239882	2H	23.1586	2H	39.69	K	K	K	K	K	K	K	K	K	K	K	K	W	W	K	K	K	K	K	K	K	K	K	K	K	K	K	K	K	K	K	K	K	K	K	K	K	K	K	K	K	K	K	K	K
SCRI_RS_12516	2H	23.796	2H	40.17	K	K	K	K	K	K	K	K	K	K	K	K	W	W	K	K	K	K	K	K	K	K	K	K	K	K	K	K	K	K	K	K	K	K	K	K	K	K	K	K	K	K	K	K	K
SCRI_RS_153693	2H	24.5042	2H	40.87	K	K	K	K	K	K	K	K	K	K	K	K	W	W	K	K	K	K	K	K	K	K	K	K	K	K	K	K	K	K	K	K	K	K	K	K	K	K	K	K	K	K	K	K	K
BOPA1_2029-1143	2H	24.5042	2H	40.73	K	K	K	K	K	K	K	K	K	K	K	K	W	W	K	K	K	K	K	K	K	K	K	K	K	K	K	K	K	K	K	K	K	K	K	K	K	K	K	K	K	K	K	K	K
SCRI_RS_155612	2H	24.7875	2H	41.17	K	K	K	K	K	K	K	K	K	K	K	K	W	W	K	K	K	K	K	K	K	K	K	K	K	K	K	K	K	K	K	K	K	K	K	K	K	K	K	K	K	K	K	K	K
SCRI_RS_115905	2H	25.2833	2H	41.67	K	K	K	K	K	K	K	K	K	K	K	K	W	W	K	K	K	K	K	K	K	K	K	K	K	K	K	K	K	K	K	K	K	K	K	K	K	K	K	K	K	K	K	K	K
BOPA1_7032-201	2H	26.7705	2H	42.37	K	K	K	K	K	K	K	K	K	K	K	K	W	W	K	K	K	K	K	K	K	K	K	K	K	K	K	K	K	K	K	K	K	K	K	K	K	K	K	K	K	K	K	K	K
SCRI_RS_147371	2H	26.7705	2H	42.37	K	K	K	K	K	K	K	K	K	K	K	K	W	W	K	K	K	K	K	K	K	K	K	K	K	K	K	K	K	K	K	K	K	K	K	K	K	K	K	K	K	K	K	K	K
SCRI_RS_182371	2H	29.3909	2H	44.54	K	K	K	K	K	K	K	K	K	K	K	K	W	W	K	K	K	K	K	K	K	K	K	K	K	K	K	K	K	K	K	K	K	K	K	K	K	K	K	K	K	K	K	K	K
SCRI_RS_207162	2H	29.3909	2H	44.54	K	K	K	K	K	K	K	K	K	K	K	K	W	W	K	K	K	K	K	K	K	K	K	K	K	K	K	K	K	K	K	K	K	K	K	K	K	K	K	K	K	K	K	K	K
BOPA1_5050-1101	2H	29.3909	2H	44.93	K	K	K	K	K	K	K	K	K	K	K	K	W	W	K	K	K	K	K	K	K	K	K	K	K	K	K	K	K	K	K	K	K	K	K	K	K	K	K	K	K	K	K	K	K
BOPA1_864-594	2H	29.3909	2H	44.88	K	K	K	K	K	K	K	K	K	K	K	K	W	W	K	K	K	K	K	K	K	K	K	K	K	K	K	K	K	K	K	K	K	K	K	K	K	K	K	K	K	K	K	K	K
SCRI_RS_10302	2H	29.3909	-	-	K	K	K	K	K	K	K	K	K	K	K	K	W	W	K	K	K	K	K	K	K	K	K	K	K	K	K	K	K	K	K	K	K	K	K	K	K	K	K	K	K	K	K	K	K
SCRI_RS_110647	2H	29.3909	-	-	K	K	K	K	K	K	K	K	K	K	K	K	W	W	K	K	K	K	K	K	K	K	K	K	K	K	K	K	K	K	K	K	K	K	K	K	K	K	K	K	K	K	K	K	K
BOPA1_816-265	2H	33.4986	2H	47.35	K	K	K	K	K	K	K	K	K	K	K	K	W	W	K	K	K	K	K	K	K	K	K	K	K	K	K	K	K	K	K	K	K	K	K	K	K	K	K	K	K	K	K	K	K
SCRI_RS_5552	2H	33.8527	2H	48.06	K	K	K	K	K	K	K	K	K	K	K	K	W	W	K	W	K	K	K	K	K	K	K	K	K	K	K	K	K	K	K	K	K	K	K	K	K	K	K	K	K	K	K	K	K
BOPA2_12_30748	2H	33.8527	-	-	K	K	K	K	K	K	K	K	K	K	K	K	W	W	W	W	K	K	K	K	K	K	K	K	K	K	K	K	K	K	K	K	K	K	K	K	K	K	K	K	K	K	K	K	K
SCRI_RS_174935	2H	37.8187	2H	51.96	K	K	K	K	K	K	K	K	K	K	K	K	W	W	W	W	K	K	K	K	K	K	K	K	K	K	K	K	K	K	K	K	K	K	K	K	K	K	K	K	K	K	K	K	K
BOPA1_1447-464	2H	38.102	2H	52.26	K	K	K	K	K	K	K	K	K	K	K	K	W	W	W	W	K	K	K	K	K	K	K	K	K	K	K	K	K	K	K	K	K	K	K	K	K	K	K	K	K	K	K	K	K
BOPA1_3709-716	2H	38.8102	2H	52.96	K	K	K	K	K	K	K	K	K	K	K	K	W	W	W	W	K	K	K	K	K	K	K	K	K	K	K	K	K	K	K	K	K	K	K	K	K	K	K	K	K	K	K	K	K
SCRI_RS_206586	2H	38.8102	2H	52.36	K	K	K	K	K	K	K	K	K	K	K	K	W	W	W	W	K	K	K	K	K	K	K	K	K	K	K	K	K	K	K	K	K	K	K	K	K	K	K	K	K	K	K	K	K
BOPA2_12_30420	2H	38.8102	2H	53.26	K	K	K	K	K	K	K	K	K	K	K	K	W	W	W	W	K	K	K	K	K	K	K	K	K	K	K	K	K	K	K	K	K	K	K	K	K	K	K	K	K	K	K	K	K
BOPA1_ABC03253-1-2-279	2H	39.3768	2H	52.96	K	K	K	K	K	K	K	K	K	K	K	K	W	W	W	W	K	K	K	K	K	K	K	K	K	K	K	K	K	K	K	K	K	K	K	K	K	K	K	K	K	K	K	K	K
SCRI_RS_89851	2H	39.3768	2H	52.96	K	K	K	K	K	K	K	K	K	K	K	K	W	W	W	W	K	K	K	K	K	K	K	K	K	K	K	K	K	K	K	K	K	K	K	K	K	K	K	K	K	K	K	K	K
SCRI_RS_207244	2H	39.3768	2H	52.96	K	K	K	K	K	K	K	K	K	K	K	K	W	W	W	W	K	K	K	K	K	K	K	K	K	K	K	K	K	K	K	K	K	K	K	K	K	K	K	K	K	K	K	K	K
BOPA1_2964-382	2H	39.6601	2H	53.26	K	K	K	K	K	K	K	K	K	K	K	K	W	W	W	W	K	K	K	K	K	K	K	K	K	K	K	K	K	K	K	K	K	K	K	K	K	K	K	K	K	K	K	K	K
SCRI_RS_81287	2H	39.6601	2H	53.26	K	K	K	K	K	K	K	K	K	K	K	K	W	W	W	W	K	K	K	K	K	K	K	K	K	K	K	K	K	K	K	K	K	K	K	K	K	K	K	K	K	K	K	K	K
BOPA1_7623-818	2H	40.085	2H	53.26	K	K	K	K	K	K	K	K	K	K	K	K	W	W	W	W	K	K	K	K	K	K	K	K	K	K	K	K	K	K	K	K	K	K	K	K	K	K	K	K	K	K	K	K	K
BOPA1_1862-765	2H	40.085	2H	52.96	K	K	K	K	K	K	K	K	K	K	K	K	W	W	W	W	K	K	K	K	K	K	K	K	K	K	K	K	K	K	K	K	K	K	K	K	K	K	K	K	K	K	K	K	K
SCRI_RS_134823	2H	40.085	-	-	K	K	K	K	K	K	K	K	K	K	K	K	W	W	W	W	K	K	K	K	K	K	K	K	K	K	K	K	K	K	K	K	K	K	K	K	K	K	K	K	K	K	K	K	K
SCRI_RS_182408	2H	40.085	-	-	K	K	K	K	K	K	K	K	K	K	K	K	W	W	W	W	K	K	K	K	K	K	K	K	K	K	K	K	K	K	K	K	K	K	K	K	K	K	K	K	K	K	K	K	K
SCRI_RS_215080	2H	40.085	-	-	K	K	K	K	K	K	K	K	K	K	K	K	W	W	W	W	K	K	K	K	K	K	K	K	K	K	K	K	K	K	K	K	K	K	K	K	K	K	K	K	K	K	K	K	K
SCRI_RS_215094	2H	40.085	-	-	K	K	K	K	K	K	K	K	K	K	K	K	W	W	W	W	K	K	K	K	K	K	K	K	K	K	K	K	K	K	K	K	K	K	K	K	K	K	K	K	K	K	K	K	K
SCRI_RS_197357	2H	40.085	-	-	K	K	K	K	K	K	K	K	K	K	K	K	W	W	W	W	K	K	K	K	K	K	K	K	K	K	K	K	K	K	K	K	K	K	K	K	K	K	K	K	K	K	K	K	K
SCRI_RS_125793	2H	40.7932	2H	54.31	K	K	K	K	K	K	K	K	K	K	K	K	W	W	W	W	K	K	K	K	K	K	K	K	K	K	K	K	K	K	K	K	K	K	K	K	K	K	K	K	K	K	K	K	K
SCRI_RS_186954	2H	40.7932	-	-	K	K	K	K	K	K	K	K	K	K	K	K	W	W	W	W	K	K	K	K	K	K	K	K	K	K	K	K	K	K	K	K	K	K	K	K	K	K	K	K	K	K	K	K	K
SCRI_RS_154981	2H	41.2181	2H	54.71	K	K	K	K	K	K	K	K	K	K	K	K	W	W	W	W	K	K	K	K	K	K	K	K	K	K	K	K	K	K	K	K	K	K	K	K	K	K	K	K	K	K	K	K	K
BOPA1_2651-1774	2H	41.8555	2H	55.41	K	K	K	K	K	K	K	K	K	K	K	K	K	W	W	W	K	K	K	K	K	K	K	K	K	K	K	K	K	K	K	K	K	K	K	K	K	K	K	K	K	K	K	K	K
SCRI_RS_206245	2H	43.8385	2H	57.31	K	K	K	K	K	K	K	K	K	K	K	K	K	W	W	W	K	K	K	K	K	K	K	K	K	K	K	K	K	K	K	K	K	K	K	W	M	K	K	K	K	K	W	K	K
SCRI_RS_171029	2H	43.8385	2H	57.31	K	K	K	K	K	K	K	K	K	K	K	K	K	W	W	W	K	K	K	K	K	K	K	K	K	K	K	K	K	K	K	K	K	K	K	W	H	K	K	K	K	K	W	K	K
SCRI_RS_152206	2H	46.3881	2H	59.91	K	K	K	K	K	K	K	K	K	K	K	K	K	W	W	W	K	K	K	K	K	K	K	K	K	K	K	K	K	K	K	K	K	K	K	K	M	K	K	K	K	K	W	K	K
SCRI_RS_201800	2H	48.4419	2H	61.91	K	K	K	K	K	K	K	K	K	K	K	K	K	W	W	W	K	K	K	K	K	K	K	K	K	K	K	K	M	K	K	K	K	K	K	K	H	K	K	K	K	K	W	K	K
SCRI_RS_8366	2H	49.4334	2H	62.91	K	K	K	K	K	K	K	K	K	K	K	K	K	W	W	W	K	K	K	K	K	K	K	K	K	K	K	K	K	K	K	K	K	K	K	K	M	K	K	K	K	K	W	K	K
SCRI_RS_221843	2H	49.4334	2H	62.91	K	K	K	K	K	K	K	K	K	K	K	K	K	W	W	W	K	K	K	K	K	K	K	K	K	K	K	K	K	K	K	K	K	K	K	K	M	K	K	K	K	K	W	K	K
BOPA1_1341-841	2H	49.4334	-	-	K	K	K	K	K	K	K	K	K	K	K	K	K	W	W	W	K	K	K	K	K	K	K	K	K	K	K	K	K	K	K	K	K	K	K	K	K	K	K	K	K	K	K	K	K
BOPA2_12_31169	2H	50.0708	2H	63.61	K	K	K	K	K	K	K	K	K	K	K	K	K	W	W	W	K	K	K	K	K	K	K	K	K	K	K	K	K	K	K	K	K	K	K	K	M	K	K	K	K	K	W	K	K
SCRI_RS_198148	2H	50.3541	2H	63.91	K	K	K	K	K	K	K	K	K	K	K	K	K	M	M	M	K	K	K	K	K	K	K	K	K	K	K	K	K	K	K	K	K	K	K	K	K	K	K	K	K	K	W	K	K
SCRI_RS_158928	2H	50.4958	2H	64.01	K	M	K	K	K	K	K	K	K	K	K	K	K	W	W	K	K	K	K	K	K	K	K	K	K	K	K	K	M	K	K	K	K	K	K	K	M	K	K	K	K	K	W	K	K
SCRI_RS_212484	2H	50.4958	2H	64.01	K	K	K	K	K	K	K	K	K	K	K	K	K	W	W	K	K	K	K	K	K	K	K	K	K	K	K	K	K	K	K	K	K	K	K	K	H	K	K	K	K	K	W	K	K
BOPA1_2128-874	2H	50.9207	2H	64.7	K	K	K	K	K	K	K	K	K	K	K	K	K	W	W	K	W	K	K	K	K	K	K	K	K	K	K	K	K	K	K	K	K	K	K	K	K	K	K	K	K	K	W	K	K
BOPA1_2417-924	2H	50.9207	2H	64.7	K	K	K	K	K	K	K	K	K	K	K	K	K	W	W	K	K	K	K	K	K	K	K	K	K	K	K	K	K	K	K	K	K	K	K	K	K	K	K	K	K	K	W	K	K
BOPA1_5823-1073	2H	50.9207	2H	64.7	K	K	K	K	K	K	K	K	K	K	K	K	K	W	W	K	W	K	K	K	K	K	K	K	K	K	K	K	K	K	K	K	K	K	K	K	K	K	K	K	K	K	W	K	K
SCRI_RS_151576	2H	50.9207	2H	64.31	K	K	K	K	K	K	K	K	K	K	K	K	K	W	W	K	K	K	K	K	K	K	K	K	K	K	K	K	K	K	K	K	K	K	K	K	K	K	K	K	K	K	W	K	K
BOPA2_12_30691	2H	51.4873	2H	64.7	K	K	K	K	K	K	K	K	K	K	K	K	K	W	W	K	W	K	K	K	K	K	K	K	K	K	K	K	K	K	K	K	K	K	K	K	K	K	K	K	K	K	W	K	K
SCRI_RS_182050	2H	51.9122	2H	65.1	K	K	K	K	K	K	K	K	K	K	K	K	K	W	W	K	W	K	K	K	K	K	K	K	K	K	K	K	K	K	K	K	K	K	K	K	K	K	K	K	K	K	W	K	K
BOPA1_6384-866	2H	52.1955	2H	65.4	K	K	K	K	K	K	K	K	K	K	K	K	K	W	W	K	W	K	K	K	K	K	K	K	K	K	K	K	K	K	K	K	K	K	K	K	K	K	K	K	K	K	W	K	K
SCRI_RS_224846	2H	52.1955	2H	65.4	K	K	K	K	K	K	K	K	K	K	K	K	K	W	W	K	W	K	K	K	K	K	K	K	K	K	K	K	K	K	K	K	K	K	K	K	K	K	K	K	K	K	W	K	K
SCRI_RS_147210	2H	52.4788	2H	65.41	K	K	K	K	K	K	K	K	K	K	K	K	K	W	W	K	W	K	K	K	K	K	K	K	K	K	K	K	K	K	K	K	K	K	K	K	K	K	K	K	K	K	W	K	K
SCRI_RS_151535	2H	52.762	2H	65.71	K	K	K	K	K	K	K	K	K	K	K	K	K	W	W	K	W	K	K	K	K	K	K	K	K	K	K	K	K	K	K	K	K	K	K	K	K	K	K	K	K	K	W	K	K
SCRI_RS_175065	2H	52.9037	2H	65.81	K	K	K	K	K	K	K	K	K	K	K	K	K	W	W	K	W	K	K	K	K	K	K	K	K	K	K	K	K	K	K	K	K	K	K	K	K	K	K	K	K	K	W	K	K
BOPA1_5113-624	2H	53.187	2H	66.11	K	K	K	K	K	K	K	K	K	K	K	K	K	W	W	K	W	K	K	K	K	K	K	K	K	K	K	K	K	K	K	K	K	K	K	K	K	K	K	K	K	K	W	K	K
BOPA1_2580-1456	2H	53.2578	2H	66.11	K	K	K	K	K	K	K	K	K	K	K	K	K	W	W	K	W	K	K	K	K	K	K	K	K	K	K	K	K	K	K	K	K	K	K	K	K	K	K	K	K	K	W	K	K
BOPA1_9060-471	2H	53.2578	2H	66.11	K	K	K	K	K	K	K	K	K	K	K	K	K	W	W	K	W	K	K	K	K	K	K	K	K	K	K	K	K	K	K	K	K	K	K	K	K	K	K	K	K	K	W	K	K
SCRI_RS_199897	2H	53.2578	2H	66.11	K	K	K	K	K	K	K	K	K	K	K	K	K	W	W	K	W	K	K	K	K	K	K	K	K	K	K	K	K	K	K	K	K	K	K	K	K	K	K	K	K	K	W	K	K
SCRI_RS_199898	2H	53.2578	2H	66.11	K	K	K	K	K	K	K	K	K	K	K	K	K	W	W	K	W	K	K	K	K	K	K	K	K	K	K	K	K	K	K	K	K	K	K	K	K	K	K	K	K	K	W	K	K
SCRI_RS_218303	2H	53.2578	2H	66.11	K	K	K	K	K	K	K	K	K	M	K	M	K	W	W	K	W	K	K	M	K	K	K	K	K	K	K	K	K	K	K	K	K	M	K	K	K	K	K	M	M	K	W	K	M
SCRI_RS_154617	2H	53.2578	2H	66.11	K	K	K	K	K	K	K	K	K	K	K	K	K	W	W	K	W	K	K	K	K	K	K	K	K	K	K	K	K	K	K	K	K	K	K	K	K	K	K	K	K	K	W	K	K
SCRI_RS_41905	2H	53.2578	-	-	K	W	K	K	K	K	K	K	K	K	K	K	K	W	W	K	W	K	K	K	K	K	K	K	K	K	K	K	K	K	K	K	K	K	K	K	K	K	K	K	K	K	K	K	K
SCRI_RS_30973	2H	53.2578	-	-	K	W	K	K	K	K	K	K	K	K	K	K	K	W	W	K	W	K	K	K	K	K	K	K	K	K	K	K	K	K	K	K	K	K	K	K	K	K	K	K	K	K	K	K	K
SCRI_RS_155546	2H	53.6827	2H	66.51	K	W	K	K	K	K	K	K	K	K	K	K	K	W	W	K	W	K	K	K	K	K	K	K	K	K	K	K	K	K	K	K	K	K	K	W	K	K	K	K	K	K	M	K	K
BOPA1_946-2500	2H	54.2493	2H	66.82	K	W	K	K	K	K	K	K	K	K	K	K	K	W	W	K	W	K	K	K	K	K	K	K	K	K	K	K	K	K	K	K	K	K	K	W	K	K	K	K	K	K	K	K	K
SCRI_RS_144592	2H	54.2493	2H	67.01	K	W	K	K	K	K	K	K	K	K	K	K	K	W	W	K	W	K	K	K	K	K	K	K	K	K	K	K	K	K	K	K	K	K	K	W	K	K	K	K	K	K	M	K	K
BOPA1_2601-171	2H	54.2493	2H	66.11	K	W	K	K	K	K	K	K	K	K	K	K	K	W	W	K	W	K	K	K	K	K	K	K	K	K	K	K	K	K	K	K	K	K	K	K	K	K	K	K	K	K	K	K	K
SCRI_RS_169913	2H	54.2493	-	-	K	W	K	K	K	K	K	K	K	K	K	K	K	W	W	K	W	K	K	K	K	K	K	K	K	K	K	K	K	K	K	K	K	K	K	K	K	K	K	K	K	K	K	K	K
SCRI_RS_195938	2H	54.2493	-	-	K	W	K	K	K	K	K	K	K	K	K	K	K	W	W	K	W	K	K	K	K	K	K	K	K	K	K	K	K	K	K	K	K	K	K	K	K	K	K	K	K	K	K	K	K
SCRI_RS_106444	2H	55.3824	2H	68.7	K	W	K	K	K	K	K	K	K	K	K	K	K	W	W	K	W	K	K	K	K	K	K	K	K	K	K	K	K	K	K	K	K	K	K	K	K	K	K	K	K	K	K	K	K
BOPA1_8889-842	2H	55.3824	2H	68.14	K	W	K	K	K	K	K	K	K	K	K	K	K	W	W	K	W	K	K	K	K	K	K	K	K	K	K	K	K	K	K	K	K	K	K	K	K	K	K	K	K	K	K	K	K
BOPA2_12_31408	2H	55.3824	-	-	K	W	K	K	K	K	K	K	K	K	K	K	K	W	W	K	W	K	K	K	K	K	K	K	K	K	K	K	K	K	K	K	K	K	K	K	K	K	K	K	K	K	K	K	K
SCRI_RS_186664	2H	55.3824	-	-	K	W	K	K	K	K	K	K	K	K	K	K	K	W	W	K	W	K	K	K	K	K	K	K	K	K	K	K	K	K	K	K	K	K	K	K	K	K	K	K	K	K	K	K	K
SCRI_RS_222933	2H	55.3824	-	-	K	W	K	K	K	K	K	K	K	K	K	K	K	W	W	K	W	K	K	K	K	K	K	K	K	K	K	K	K	K	K	K	K	K	K	K	K	K	K	K	K	K	K	K	K
BOPA1_411-495	2H	55.5241	2H	68.8	K	W	K	K	K	K	K	K	K	K	K	K	K	W	W	W	W	K	K	K	K	K	K	K	K	K	K	K	K	K	K	K	K	K	K	K	K	K	K	K	K	K	K	K	K
BOPA1_5254-1845	2H	55.5241	2H	68.7	K	W	K	K	K	K	K	K	K	K	K	K	K	W	W	W	W	K	K	K	K	K	K	K	K	K	K	K	K	K	K	K	K	K	K	K	K	K	K	K	K	K	K	K	K
BOPA1_5759-478	2H	55.5241	2H	68.8	K	W	K	K	K	K	K	K	K	K	K	K	K	W	W	W	W	K	K	K	K	K	K	K	K	K	K	K	K	K	K	K	K	K	K	K	K	K	K	K	K	K	K	K	K
BOPA1_ABC01644-1-3-379	2H	55.5241	2H	68.8	K	W	K	K	K	K	K	K	K	K	K	K	K	W	W	W	W	K	K	K	K	K	K	K	K	K	K	K	K	K	K	K	K	K	K	K	K	K	K	K	K	K	K	K	K
SCRI_RS_141874	2H	55.5241	2H	68.7	K	W	K	K	K	K	K	K	K	K	K	K	K	W	W	W	W	K	K	K	K	K	K	K	K	K	K	K	K	K	K	K	K	K	K	K	K	K	K	K	K	K	K	K	K
SCRI_RS_196323	2H	55.5241	2H	68.7	K	W	K	K	K	K	K	K	K	K	K	K	K	W	W	W	W	K	K	K	K	K	K	K	K	K	K	K	K	K	K	K	K	K	K	K	K	K	K	K	K	K	K	K	K
SCRI_RS_151430	2H	55.5241	2H	68.7	K	W	K	K	K	K	K	K	K	K	K	K	K	W	W	W	W	K	K	K	K	K	K	K	K	K	K	K	K	K	K	K	K	K	K	K	K	K	K	K	K	K	K	K	K
SCRI_RS_164343	2H	55.5241	2H	68.7	K	M	K	K	K	K	K	K	K	K	K	K	K	W	W	W	W	K	K	K	K	K	K	K	K	K	K	K	K	K	K	K	K	K	K	K	K	K	K	K	K	K	K	K	K
SCRI_RS_219675	2H	55.5241	2H	68.7	K	W	K	K	K	K	K	K	K	K	K	K	K	W	W	W	W	K	K	K	K	K	K	K	K	K	K	K	K	K	K	K	K	K	K	K	K	K	K	K	K	K	K	K	K
SCRI_RS_136233	2H	55.5241	2H	68.7	K	W	K	K	K	K	K	K	K	K	K	K	K	W	W	W	W	K	K	K	K	K	K	K	K	K	K	K	K	K	K	K	K	K	K	K	K	K	K	K	K	K	K	K	K
SCRI_RS_103572	2H	55.5241	-	-	K	W	K	K	K	K	K	K	K	K	K	K	K	W	W	K	W	K	K	K	K	K	K	K	K	K	K	K	K	K	K	K	K	K	K	K	K	K	K	K	K	K	K	K	K
SCRI_RS_153174	2H	55.5241	-	-	K	W	K	K	K	K	K	K	K	K	K	K	K	W	W	K	W	K	K	K	K	K	K	K	K	K	K	K	K	K	K	K	K	K	K	K	K	K	K	K	K	K	K	K	K
BOPA1_1275-734	2H	55.5949	2H	68.8	K	W	K	K	K	K	K	K	K	K	K	K	K	W	W	W	W	K	K	K	K	K	K	K	K	K	K	K	K	K	K	K	K	K	K	K	K	K	K	K	K	K	K	K	K
BOPA1_ABC06091-1-1-187	2H	55.6657	2H	68.8	K	W	K	K	K	K	K	K	K	K	K	K	K	W	W	W	W	K	K	K	K	K	K	K	K	K	K	K	K	K	K	K	K	K	K	K	K	K	K	K	K	K	K	K	K
SCRI_RS_109192	2H	55.6657	2H	68.8	K	W	K	K	K	K	K	K	K	K	K	K	K	W	W	W	W	K	K	K	K	K	K	K	K	K	K	K	K	K	K	K	K	K	K	K	K	K	K	K	K	K	K	K	K
SCRI_RS_167882	2H	55.6657	2H	68.8	K	W	K	K	K	K	K	K	K	K	K	K	K	W	W	W	W	K	K	K	K	K	K	K	K	K	K	K	K	K	K	K	K	K	K	K	K	K	K	K	K	K	K	K	K
SCRI_RS_146010	2H	55.6657	2H	68.8	K	W	K	K	K	K	K	K	K	K	K	K	K	W	W	W	W	K	K	K	K	K	K	K	K	K	K	K	K	K	K	K	K	K	K	K	K	K	K	K	K	K	K	K	K
SCRI_RS_192676	2H	55.6657	2H	68.8	K	W	K	K	K	K	K	K	K	K	K	K	K	W	W	W	W	K	K	K	K	K	K	K	K	K	K	K	K	K	K	K	K	K	K	K	K	K	K	K	K	K	K	K	K
SCRI_RS_122871	2H	55.6657	2H	68.8	K	W	K	K	K	K	K	K	K	K	K	K	K	W	W	W	W	K	K	K	K	K	K	K	K	K	K	K	K	K	K	K	K	K	K	K	K	K	K	K	K	K	K	K	K
SCRI_RS_131325	2H	55.6657	2H	68.8	K	W	K	K	K	K	K	K	K	K	K	K	K	W	W	K	W	K	K	K	K	K	K	K	K	K	K	K	K	K	K	K	K	K	K	K	K	K	K	K	K	K	K	K	K
BOPA2_12_30251	2H	55.6657	2H	67.89	K	W	K	K	K	K	K	K	K	K	K	K	K	W	W	K	W	K	K	K	K	K	K	K	K	K	K	K	K	K	K	K	K	K	K	K	K	K	K	K	K	K	K	K	K
SCRI_RS_162700	2H	55.6657	-	-	K	W	K	K	K	K	K	K	K	K	K	K	K	W	W	K	W	K	K	K	K	K	K	K	K	K	K	K	K	K	K	K	K	K	K	K	K	K	K	K	K	K	K	K	K
SCRI_RS_238404	2H	55.6657	-	-	K	W	K	K	K	K	K	K	K	K	K	K	K	W	W	K	W	K	K	K	K	K	K	K	K	K	K	K	K	K	K	K	K	K	K	K	K	K	K	K	K	K	K	K	K
BOPA1_1040-279	2H	55.949	2H	68.8	K	W	K	K	K	K	K	K	K	K	K	K	K	W	W	W	W	K	K	K	K	K	K	K	K	K	K	K	K	K	K	K	K	K	K	K	K	K	K	K	K	K	K	K	K
BOPA1_4233-63	2H	55.949	2H	68.8	K	W	K	K	K	K	K	K	K	K	K	K	K	W	W	W	W	K	K	K	K	K	K	K	K	K	K	K	K	K	K	K	K	K	K	K	K	K	K	K	K	K	K	K	K
SCRI_RS_198865	2H	55.949	2H	68.8	K	W	K	K	K	K	K	K	K	K	K	K	K	W	W	W	W	K	K	K	K	K	K	K	K	K	K	K	K	K	K	K	K	K	K	K	K	K	K	K	K	K	K	K	K
SCRI_RS_173145	2H	56.2323	2H	69	K	W	K	K	K	K	K	K	K	K	K	K	K	W	W	K	W	K	K	K	K	K	K	K	K	K	K	K	K	K	K	K	K	K	K	K	K	K	K	K	K	K	K	K	K
SCRI_RS_240011	2H	56.2323	2H	69	K	W	K	K	K	K	K	K	K	K	K	K	K	W	W	K	W	K	K	K	K	K	K	K	K	K	K	K	K	K	K	K	K	K	K	K	K	K	K	K	K	K	K	K	K
SCRI_RS_170235	2H	56.2323	2H	69	K	W	K	M	M	K	K	M	M	M	M	K	M	W	W	M	W	K	M	M	K	M	K	M	M	K	K	K	M	K	K	K	K	M	K	M	K	K	M	M	M	M	K	K	M
BOPA1_13926-531	2H	56.3739	2H	69	K	W	K	K	K	K	K	K	K	K	K	K	K	W	W	K	K	K	K	K	K	K	K	K	K	K	K	K	K	K	K	K	K	K	K	K	K	K	K	K	K	K	K	K	K
BOPA2_12_30042	2H	56.3739	2H	69	K	W	K	K	K	K	K	K	K	K	K	K	K	W	W	K	K	K	K	K	K	K	K	K	K	K	K	K	K	K	K	K	K	K	K	K	K	K	K	K	K	K	K	K	K
BOPA2_12_30582	2H	56.3739	2H	69	K	W	K	K	K	K	K	K	K	K	K	K	K	W	W	K	K	K	K	K	K	K	K	K	K	K	K	K	K	K	K	K	K	K	K	K	K	K	K	K	K	K	K	K	K
SCRI_RS_160277	2H	56.3739	2H	69	K	W	K	K	K	K	K	K	K	K	K	K	K	W	W	K	K	K	K	K	K	K	K	K	K	K	K	K	K	K	K	K	K	K	K	K	K	K	K	K	K	K	K	K	K
SCRI_RS_235694	2H	56.3739	2H	69	K	W	K	K	K	K	K	K	K	K	K	K	K	W	W	K	K	K	K	K	K	K	K	K	K	K	K	K	K	K	K	K	K	K	K	K	K	K	K	K	K	K	K	K	K
SCRI_RS_219740	2H	56.3739	2H	69	K	W	K	K	K	K	K	K	K	K	K	K	K	W	W	K	K	K	K	K	K	K	K	K	K	K	K	K	K	K	K	K	K	K	K	K	K	K	K	K	K	K	K	K	K
SCRI_RS_185513	2H	56.3739	2H	69	K	W	K	K	K	K	K	K	K	K	K	K	K	W	W	K	K	K	K	K	K	K	K	K	K	K	K	K	K	K	K	K	K	K	K	K	K	K	K	K	K	K	K	K	K
SCRI_RS_182959	2H	56.3739	2H	69	K	W	K	K	K	K	K	K	K	K	K	K	K	W	W	K	W	K	K	K	K	K	K	K	K	K	K	K	K	K	K	K	K	K	K	K	K	K	K	K	K	K	K	K	K
SCRI_RS_137018	2H	56.3739	2H	69	K	W	K	K	K	K	K	K	K	K	K	K	K	W	W	K	W	K	K	K	K	K	K	K	K	K	K	K	K	K	K	K	K	K	K	K	K	K	K	K	K	K	K	K	K
BOPA1_3662-381	2H	56.3739	2H	67.21	K	W	K	K	K	K	K	K	K	K	K	K	K	W	W	K	W	K	K	K	K	K	K	K	K	K	K	K	K	K	K	K	K	K	K	K	K	K	K	K	K	K	K	K	K
SCRI_RS_6099	2H	56.3739	-	-	K	W	K	K	K	K	K	K	K	K	K	K	K	W	W	K	W	K	K	K	K	K	K	K	K	K	K	K	K	K	K	K	K	K	K	K	K	K	K	K	K	K	K	K	K
BOPA1_2528-2111	2H	56.5156	2H	69	K	W	K	K	K	K	K	K	K	K	K	K	K	W	W	K	K	K	K	K	K	K	K	K	K	K	K	K	K	K	K	K	K	K	K	K	K	K	K	K	K	K	K	K	K
BOPA1_4049-233	2H	56.5156	2H	69.2	K	W	K	K	K	K	K	K	K	K	K	K	K	W	W	K	K	K	K	K	K	K	K	K	K	K	K	K	K	K	K	K	K	K	K	K	K	K	K	K	K	K	K	K	K
BOPA1_ABC07566-2-1-82	2H	56.5156	2H	69	K	W	K	K	K	K	K	K	K	K	K	K	K	W	W	K	K	K	K	K	K	K	K	K	K	K	K	K	K	K	K	K	K	K	K	K	K	K	K	K	K	K	K	K	K
BOPA2_12_30561	2H	56.5156	2H	69	K	W	K	K	K	K	K	K	K	K	K	K	K	W	W	K	K	K	K	K	K	K	K	K	K	K	K	K	K	K	K	K	K	K	K	K	K	K	K	K	K	K	K	K	K
BOPA2_12_31175	2H	56.5156	2H	69	K	W	K	K	K	K	K	K	K	K	K	K	K	W	W	K	K	K	K	K	K	K	K	K	K	K	K	K	K	K	K	K	K	K	K	K	K	K	K	K	K	K	K	K	K
SCRI_RS_175300	2H	56.5156	2H	69	K	W	K	K	K	K	K	K	K	K	K	K	K	W	W	K	K	K	K	K	K	K	K	K	K	K	K	K	K	K	K	K	K	K	K	K	K	K	K	K	K	K	K	K	K
SCRI_RS_117951	2H	56.5156	2H	69	K	W	K	K	K	K	K	K	K	K	K	K	K	W	W	K	K	K	K	K	K	K	K	K	K	K	K	K	K	K	K	K	K	K	K	K	K	K	K	K	K	K	K	K	K
SCRI_RS_232669	2H	56.5156	2H	69	K	W	K	K	K	K	K	K	K	K	K	K	K	W	W	K	K	K	K	K	K	K	K	K	K	K	K	K	K	K	K	K	K	K	K	K	K	K	K	K	K	K	K	K	K
SCRI_RS_135468	2H	56.5156	2H	69	K	W	K	K	K	K	K	K	K	K	K	K	K	W	W	K	K	K	K	K	K	K	K	K	K	K	K	K	K	K	K	K	K	K	K	K	K	K	K	K	K	K	K	K	K
SCRI_RS_155067	2H	56.5156	2H	69	K	W	K	K	K	K	K	K	K	K	K	K	K	W	W	K	K	K	K	K	K	K	K	K	K	K	K	K	K	K	K	K	K	K	K	K	K	K	K	K	K	K	K	K	K
SCRI_RS_12448	2H	56.5156	2H	69	K	W	K	K	K	K	K	K	K	K	K	K	K	W	W	K	K	K	K	K	K	K	K	K	K	K	K	K	K	K	K	K	K	K	K	K	K	K	K	K	K	K	K	K	K
SCRI_RS_157207	2H	56.5156	2H	69	K	W	K	K	K	K	K	K	K	K	K	K	K	W	W	K	K	K	K	K	K	K	K	K	K	K	K	K	K	K	K	K	K	K	K	K	K	K	K	K	K	K	K	K	K
SCRI_RS_194640	2H	56.5156	2H	69	K	W	K	K	K	K	K	K	K	K	K	K	K	W	W	K	K	K	K	K	K	K	K	K	K	K	K	K	K	K	K	K	K	K	K	K	K	K	K	K	K	K	K	K	K
BOPA1_2634-2228	2H	57.0113	2H	69.55	K	K	K	K	K	K	K	K	K	K	K	K	K	W	W	K	K	W	K	K	K	K	K	K	K	K	K	K	K	K	K	K	K	K	K	K	K	K	K	K	K	K	K	K	K
BOPA1_5160-268	2H	57.0113	2H	69.55	K	K	K	K	K	K	K	K	K	K	K	K	K	W	W	K	K	W	K	K	K	K	K	K	K	K	K	K	K	K	K	K	K	K	K	K	K	K	K	K	K	K	K	K	K
SCRI_RS_4969	2H	57.0113	2H	69.55	K	K	K	K	K	K	K	K	K	K	K	K	K	W	W	K	K	W	K	K	K	K	K	K	K	K	K	K	K	K	K	K	K	K	K	K	K	K	K	K	K	K	K	K	K
SCRI_RS_100054	2H	57.0113	2H	69.55	K	K	K	K	K	K	K	K	K	K	K	K	K	W	W	K	K	W	K	K	K	K	K	K	K	K	K	K	K	K	K	K	K	K	K	K	K	K	K	K	K	K	K	K	K
SCRI_RS_177375	2H	57.0113	2H	69.55	K	K	K	K	K	K	K	K	K	K	K	K	K	W	W	K	K	W	K	K	K	K	K	K	K	K	K	K	K	K	K	K	K	K	K	K	K	K	K	K	K	K	K	K	K
SCRI_RS_134925	2H	57.0113	2H	69.55	K	K	K	K	K	K	K	K	K	K	K	K	K	W	W	K	K	W	K	K	K	K	K	K	K	K	K	K	K	K	K	K	K	K	K	K	K	K	K	K	K	K	K	K	K
SCRI_RS_237688	2H	57.0822	2H	69.55	K	K	K	K	K	K	K	K	K	K	K	K	K	W	W	K	K	W	K	K	K	K	K	K	K	K	K	K	K	K	K	K	K	K	K	K	K	K	K	K	K	K	K	K	K
SCRI_RS_222769	2H	57.153	2H	69.55	K	K	K	K	K	K	K	K	K	K	K	K	K	W	W	K	K	W	K	K	K	K	K	K	K	K	K	K	K	K	K	K	K	K	K	K	K	K	K	K	K	K	K	K	K
BOPA1_1917-848	2H	57.4363	2H	69.55	K	K	K	K	K	K	K	K	K	K	K	K	K	W	W	K	K	W	K	K	K	K	K	K	K	K	K	K	K	K	K	K	K	K	K	K	K	K	K	K	K	K	K	K	K
BOPA2_12_30265	2H	57.4363	2H	69.55	K	K	K	K	K	K	K	K	K	K	K	K	K	W	W	K	K	W	K	K	K	K	K	K	K	K	K	K	K	K	K	K	K	K	K	K	K	K	K	K	K	K	K	K	K
SCRI_RS_167594	2H	57.4363	2H	69.55	K	K	K	K	K	K	K	K	K	K	K	K	K	W	W	K	K	W	K	K	K	K	K	K	K	K	K	K	K	K	K	K	K	K	K	K	K	K	K	K	K	K	K	K	K
SCRI_RS_208320	2H	57.4363	2H	69.55	K	K	K	K	K	K	K	K	K	K	K	K	K	W	W	K	K	W	K	K	K	K	K	K	K	K	K	K	K	K	K	K	K	K	K	K	K	K	K	K	K	K	K	K	K
SCRI_RS_235063	2H	57.4363	2H	69.55	K	K	K	K	K	K	K	K	K	K	K	K	K	W	W	K	K	W	K	K	K	K	K	K	K	K	K	K	K	K	K	K	K	K	K	K	K	K	K	K	K	K	K	K	K
SCRI_RS_196026	2H	57.4363	2H	69.55	K	K	K	K	K	K	K	K	K	K	K	K	K	W	W	K	K	W	K	K	K	K	K	K	K	K	K	K	K	K	K	K	K	K	K	K	K	K	K	K	K	K	K	K	K
BOPA1_2895-1064	2H	57.8612	2H	69.55	K	K	K	K	K	K	K	K	K	K	K	K	K	W	W	K	K	W	K	K	K	K	K	K	K	K	K	K	K	K	K	K	K	K	K	K	K	K	K	K	K	K	K	K	K
SCRI_RS_133246	2H	58.0028	2H	69.55	K	K	K	K	K	K	K	K	K	K	K	K	K	M	W	K	K	W	K	K	K	K	K	K	K	K	K	K	K	K	K	K	K	K	K	K	K	K	K	K	K	K	K	K	K
SCRI_RS_185710	2H	58.0737	2H	69.55	K	K	K	K	K	K	K	K	K	K	K	K	K	W	W	K	K	W	K	K	K	K	K	K	K	K	K	K	K	K	K	K	K	K	K	K	K	K	K	K	K	K	K	K	K
SCRI_RS_168400	2H	58.0737	2H	69.55	K	K	K	K	K	K	K	K	K	K	K	K	K	W	W	K	K	W	K	K	K	K	K	K	K	K	K	K	K	K	K	K	K	K	K	K	K	K	K	K	K	K	K	K	K
BOPA1_2517-487	2H	58.7819	2H	69.55	K	K	K	K	K	K	K	K	K	K	K	K	K	W	W	K	K	W	K	K	K	K	K	K	K	K	K	K	K	K	K	K	K	K	K	K	K	K	K	K	K	K	K	K	K
BOPA1_4717-386	2H	58.7819	2H	69.55	K	K	K	K	K	K	K	K	K	K	K	K	K	W	W	K	K	W	K	K	K	K	K	K	K	K	K	K	K	K	K	K	K	K	K	K	K	K	K	K	K	K	K	K	K
BOPA1_7489-442	2H	58.7819	2H	69.55	K	K	K	K	K	K	K	K	K	K	K	K	K	W	W	K	K	W	K	K	K	K	K	K	K	K	K	K	K	K	K	K	K	K	K	K	K	K	K	K	K	K	K	K	K
BOPA1_2910-1085	2H	59.0652	2H	69.55	K	K	K	K	K	K	K	K	K	H	K	K	K	W	W	K	K	W	K	K	K	K	K	K	K	K	K	K	K	K	K	K	K	K	K	K	K	K	K	K	K	K	K	K	K
BOPA2_12_30275	2H	59.0652	2H	69.55	K	K	K	K	K	K	K	K	K	K	K	K	K	W	W	K	K	W	K	K	K	K	K	K	K	K	K	K	K	K	K	K	K	K	K	K	K	K	K	K	K	K	K	K	K
SCRI_RS_12492	2H	59.0652	2H	69.55	K	K	K	K	K	K	K	K	K	K	K	K	K	W	W	K	K	W	K	K	K	K	K	K	K	K	K	K	K	K	K	K	K	K	K	K	K	K	K	K	K	K	K	K	K
BOPA2_12_30724	2H	59.4901	2H	69.55	K	K	K	K	K	K	K	K	K	H	K	K	K	K	W	K	K	K	K	K	K	K	K	K	K	K	K	K	K	K	K	K	K	K	K	K	K	K	K	K	K	K	K	K	K
SCRI_RS_137710	2H	59.4901	2H	69.55	K	K	K	K	K	K	K	K	K	H	K	K	K	K	W	K	K	K	K	K	K	K	K	K	K	K	K	K	K	K	K	K	K	K	K	K	K	K	K	K	K	K	K	K	K
SCRI_RS_144776	2H	59.4901	2H	69.55	K	K	K	K	K	K	K	K	K	H	K	K	K	K	W	K	K	K	K	K	K	K	K	K	K	K	K	K	K	K	K	K	K	K	K	K	K	K	K	K	K	K	K	K	K
SCRI_RS_213826	2H	59.4901	2H	69.55	K	K	K	K	K	K	K	K	K	H	K	K	K	K	W	K	K	K	K	K	K	K	K	K	K	K	K	K	K	K	K	K	K	K	K	K	K	K	K	K	K	K	K	K	K
SCRI_RS_172109	2H	59.4901	2H	69.55	K	K	K	K	K	K	K	K	K	H	K	K	K	K	W	K	K	K	K	K	K	K	K	K	K	K	K	K	K	K	K	K	K	K	K	K	K	K	K	K	K	K	K	K	K
SCRI_RS_200879	2H	59.4901	2H	69.55	K	K	K	K	K	K	K	K	K	H	K	K	K	K	W	K	K	K	K	K	K	K	K	K	K	K	K	K	K	K	K	K	K	K	K	K	K	K	K	K	K	K	K	K	K
SCRI_RS_171203	2H	59.4901	2H	69.55	K	K	K	K	K	K	K	K	K	H	K	K	K	K	W	K	K	K	K	K	K	K	K	K	K	K	K	K	K	K	K	K	K	K	K	K	K	K	K	K	K	K	K	K	K
SCRI_RS_154657	2H	59.4901	2H	69.55	K	K	K	K	K	K	K	K	K	H	K	K	K	K	W	K	K	K	K	K	K	K	K	K	K	K	K	K	K	K	K	K	K	K	K	K	K	K	K	K	K	K	K	K	K
SCRI_RS_195208	2H	59.5609	2H	69.55	M	M	K	K	K	K	K	K	K	H	K	K	K	K	M	K	K	M	K	K	M	K	M	K	K	M	K	K	M	K	M	K	K	K	M	K	M	M	K	K	K	K	K	M	K
BOPA2_12_11278	2H	59.7025	2H	69.55	K	K	K	K	K	K	K	K	K	H	K	K	K	K	W	K	K	K	K	K	K	K	K	K	K	K	K	K	K	K	K	K	K	K	K	K	K	K	K	K	K	K	K	K	K
SCRI_RS_165574	2H	59.915	2H	69.55	K	K	K	K	K	K	K	K	K	H	K	K	K	K	W	K	K	K	K	K	K	K	K	K	K	K	K	K	K	K	K	K	K	K	K	K	K	K	K	K	K	K	K	K	K
BOPA1_6911-866	2H	60.6941	2H	69.88	K	K	K	K	K	K	K	K	K	H	K	K	K	K	W	K	W	K	K	K	K	K	K	K	K	K	K	K	K	K	K	K	K	K	K	K	K	K	K	K	K	K	K	K	K
BOPA1_6510-1430	2H	60.8357	2H	69.88	K	K	K	K	K	K	K	K	K	H	K	K	K	K	W	K	W	K	K	K	K	K	K	K	K	K	K	K	K	K	K	K	K	K	K	K	K	K	K	K	K	K	K	K	K
SCRI_RS_4802	2H	60.8357	2H	69.98	K	K	K	K	K	K	K	K	K	H	K	K	K	K	W	K	W	K	K	K	K	K	K	K	K	K	K	K	K	K	K	K	K	K	K	K	K	K	K	K	K	K	K	K	K
SCRI_RS_162413	2H	62.4646	2H	72.44	K	K	K	K	K	K	K	K	K	K	K	K	K	K	W	K	W	K	K	K	K	K	K	K	K	K	K	K	K	K	K	K	K	K	K	K	K	K	K	K	K	K	K	K	K
SCRI_RS_153531	2H	62.7479	2H	72.64	K	K	K	K	K	K	K	K	K	K	K	K	K	K	W	K	W	K	K	K	K	K	K	K	K	K	K	K	K	K	K	K	K	K	K	K	K	K	K	K	K	K	K	K	K
SCRI_RS_163975	2H	64.4476	2H	74.34	K	K	K	K	K	K	K	K	K	K	K	K	K	K	K	K	W	K	K	K	K	K	K	K	K	K	K	K	K	K	K	K	K	K	K	K	K	K	K	K	K	K	K	K	K
SCRI_RS_59851	2H	64.4476	2H	74.34	K	K	K	K	K	K	K	K	K	K	K	K	K	K	K	K	W	K	K	K	K	K	K	K	K	K	K	K	K	K	K	K	K	K	K	K	K	K	K	K	K	K	K	K	K
SCRI_RS_198848	2H	64.5892	2H	76	K	K	K	K	K	K	K	K	K	K	K	K	K	K	K	K	W	K	K	K	K	K	K	K	K	K	K	K	K	K	K	K	K	K	K	K	K	K	K	K	K	K	K	K	K
BOPA1_7660-476	2H	64.8725	2H	76.3	K	K	K	K	K	K	K	K	K	K	K	K	K	K	K	K	W	K	K	K	K	K	K	K	K	K	K	K	K	K	K	K	K	K	K	K	K	K	K	K	K	K	K	K	K
BOPA1_4037-916	2H	66.289	2H	77.34	K	K	K	K	K	K	K	K	K	K	K	K	K	K	K	K	W	K	K	K	K	K	K	K	K	K	K	K	K	K	K	K	K	K	K	K	K	K	K	K	K	K	K	K	K
BOPA1_5499-1430	2H	67.4929	2H	77.34	K	K	K	K	K	K	K	K	K	K	K	K	K	K	K	K	W	K	K	K	K	K	K	K	K	K	K	K	K	K	K	K	K	K	K	K	K	K	K	K	K	K	K	K	K
BOPA1_6280-1098	2H	67.9178	2H	77.34	K	K	K	K	K	K	K	K	K	K	K	K	K	K	K	K	W	K	K	K	K	K	K	K	K	K	K	K	K	K	K	K	K	K	K	K	K	K	K	K	K	K	K	K	K
SCRI_RS_156871	2H	67.9178	2H	77.34	K	K	K	K	K	K	K	K	K	K	K	K	K	K	K	K	W	K	K	K	K	K	K	K	K	K	K	K	K	K	K	K	K	K	K	K	K	K	K	K	K	K	K	K	K
SCRI_RS_206677	2H	67.9178	2H	77.34	K	K	K	K	K	K	K	K	K	K	K	K	K	K	K	K	W	K	K	K	K	K	K	K	K	K	K	K	K	K	K	K	K	K	K	K	K	K	K	K	K	K	K	K	K
SCRI_RS_221992	2H	67.9178	2H	77.34	K	K	K	K	K	K	K	K	K	K	K	K	K	K	K	K	W	K	K	K	K	K	K	K	K	K	K	K	K	K	K	K	K	K	K	K	K	K	K	K	K	K	K	K	K
SCRI_RS_207224	2H	67.9178	2H	77.34	K	K	K	K	K	K	K	K	K	K	K	K	K	K	K	K	W	K	K	K	K	K	K	K	K	K	K	K	K	K	K	K	K	K	K	K	K	K	K	K	K	K	K	K	K
SCRI_RS_73	2H	67.9178	2H	77.34	K	K	K	K	K	K	K	K	K	K	K	K	K	K	K	K	W	K	K	K	K	K	K	K	K	K	K	K	K	K	K	K	K	K	K	K	K	K	K	K	K	K	K	K	K
BOPA1_2809-271	2H	67.9178	2H	77.68	K	K	K	K	K	K	K	K	K	K	K	K	K	K	K	K	W	K	K	K	K	K	K	K	K	K	K	K	K	K	K	K	K	K	K	K	K	K	K	K	K	K	K	K	K
SCRI_RS_9469	2H	68.0595	2H	77.54	K	K	K	K	K	K	K	K	K	K	K	K	K	K	K	K	W	K	K	K	K	K	K	K	K	K	K	K	K	K	K	K	K	K	K	K	K	K	K	K	K	K	K	K	K
BOPA1_5573-1170	2H	68.5552	2H	78.02	K	K	K	K	K	K	K	K	K	K	K	K	K	K	K	K	W	K	K	K	K	K	K	K	K	K	K	K	K	K	K	K	K	K	K	K	K	K	K	K	K	K	K	K	K
BOPA2_12_31394	2H	68.5552	2H	78.02	K	K	K	K	K	K	K	K	K	K	K	K	K	K	K	K	W	K	K	K	K	K	K	K	K	K	K	K	K	K	K	K	K	K	K	K	K	K	K	K	K	K	K	K	K
SCRI_RS_150	2H	68.5552	2H	78.02	K	K	K	K	K	K	K	K	K	K	K	K	K	K	K	K	W	K	K	K	K	K	K	K	K	K	K	K	K	K	K	K	K	K	K	K	K	K	K	K	K	K	K	K	K
BOPA1_8065-1203	2H	69.2635	2H	79.75	K	K	K	K	K	K	K	K	K	K	K	K	K	K	K	K	K	K	K	K	K	K	K	K	K	K	K	K	K	K	K	K	K	K	K	K	K	K	K	K	K	K	K	K	K
BOPA2_12_30696	2H	70.8215	2H	81.26	K	K	K	M	K	K	K	K	K	K	K	K	K	K	K	K	K	K	K	K	K	K	K	K	K	K	K	K	K	K	K	K	K	K	K	K	K	K	K	K	K	K	K	K	K
BOPA1_ConsensusGBS0033-1	2H	70.8215	2H	81.26	K	K	K	H	K	K	K	K	K	K	K	K	K	K	K	K	K	K	K	K	K	K	K	K	K	K	K	K	K	K	K	K	K	K	K	K	K	K	K	K	K	K	K	K	K
BOPA2_12_31398	2H	70.8215	2H	79.75	K	K	K	H	K	K	K	K	K	K	K	K	K	K	K	K	K	K	K	K	K	K	K	K	K	K	K	K	K	K	K	K	K	K	K	K	K	K	K	K	K	K	K	K	K
SCRI_RS_50957	2H	70.8215	-	-	K	K	K	M	K	K	K	K	K	K	K	K	K	K	K	K	K	K	K	K	K	K	K	K	K	K	K	K	K	K	K	K	K	K	K	K	K	K	K	K	K	K	K	K	K
SCRI_RS_219568	2H	70.9632	2H	81.46	K	K	K	H	K	K	K	K	K	K	K	K	K	K	K	K	K	K	K	K	K	K	K	K	K	K	K	K	K	K	K	K	K	K	K	K	K	K	K	K	K	K	K	K	K
SCRI_RS_172667	2H	70.9632	-	-	K	K	K	H	K	K	K	K	K	K	K	K	K	K	K	K	K	K	K	K	K	K	K	K	K	K	K	K	K	K	K	K	K	K	K	K	K	K	K	K	K	K	K	K	K
SCRI_RS_207237	2H	70.9632	-	-	K	K	K	H	K	K	K	K	K	K	K	K	K	K	K	K	K	K	K	K	K	K	K	K	K	K	K	K	K	K	K	K	K	K	K	K	K	K	K	K	K	K	K	K	K
SCRI_RS_17898	2H	73.5127	2H	84.49	K	K	K	M	K	K	K	K	K	K	K	K	K	K	K	K	K	K	K	K	K	K	K	K	K	K	K	K	K	K	K	K	K	K	K	K	K	K	K	K	K	K	K	K	K
BOPA2_12_31293	2H	73.7252	2H	84.69	K	K	K	M	K	K	K	K	K	K	K	K	K	K	K	K	K	K	K	K	K	K	K	K	K	K	K	K	K	K	K	K	K	K	K	K	K	K	K	K	K	K	K	K	K
SCRI_RS_235874	2H	74.0793	2H	85.09	K	K	K	M	K	K	K	K	K	K	K	K	K	K	K	K	K	K	K	K	K	K	K	K	K	K	K	K	K	K	K	K	K	K	K	K	K	K	K	K	K	K	K	K	K
SCRI_RS_7517	2H	74.0793	-	-	K	K	K	M	K	K	K	K	K	K	K	K	K	K	K	K	K	K	K	K	K	K	K	K	K	K	K	K	K	K	K	K	K	K	K	K	K	K	K	K	K	K	K	K	K
SCRI_RS_133539	2H	74.1501	2H	85.19	K	K	K	W	K	K	K	K	K	K	K	K	K	K	K	K	K	K	K	K	K	K	K	K	K	K	K	K	K	K	K	K	K	K	K	K	K	K	K	K	K	K	K	K	K
SCRI_RS_156323	2H	74.4334	2H	85.39	K	K	K	W	K	K	K	K	K	K	K	K	K	K	K	K	K	K	K	K	K	K	K	K	K	K	K	K	K	K	K	K	K	K	K	K	K	K	K	K	K	K	K	K	K
BOPA1_7549-782	2H	75.2125	2H	86.84	K	K	W	W	K	K	K	K	K	K	K	K	K	K	K	K	K	K	K	W	K	W	K	K	K	K	K	K	K	K	K	K	K	K	K	K	K	K	K	K	K	K	K	K	K
SCRI_RS_222844	2H	75.2125	2H	86.44	K	K	W	W	M	K	K	K	M	K	K	K	K	K	K	K	K	K	M	W	K	W	K	K	M	K	K	K	K	K	K	K	K	M	K	K	K	K	M	K	M	K	K	K	K
SCRI_RS_239742	2H	75.2125	2H	86.44	K	K	W	W	K	K	K	K	K	K	K	K	K	K	K	K	K	K	K	W	K	W	K	K	K	K	K	K	K	K	K	K	K	K	K	K	K	K	K	K	K	K	K	K	K
SCRI_RS_221795	2H	75.2125	2H	86.44	K	K	W	M	K	K	K	K	K	K	K	K	K	K	K	K	K	K	K	W	K	W	K	K	K	K	K	K	K	K	K	K	K	K	K	K	K	K	K	K	K	K	K	K	K
SCRI_RS_129857	2H	75.2125	2H	86.44	K	K	W	M	K	K	K	K	K	K	K	K	K	K	K	K	K	K	K	W	K	W	K	K	K	K	K	K	K	K	K	K	K	K	K	K	K	K	K	K	K	K	K	K	K
SCRI_RS_200291	2H	76.0623	2H	87.34	K	K	W	M	K	K	K	K	K	K	K	K	K	K	K	K	K	K	K	W	K	W	K	K	K	K	K	K	K	K	K	K	K	K	K	K	K	K	K	K	K	K	K	K	K
SCRI_RS_154398	2H	76.204	2H	87.44	K	K	W	W	K	K	K	K	K	K	K	K	K	K	K	K	K	K	K	W	K	W	K	K	K	K	K	K	K	K	K	K	K	K	K	K	K	K	K	K	K	K	K	K	K
SCRI_RS_157347	2H	76.204	2H	87.44	K	K	W	H	K	K	K	K	K	K	K	K	K	K	K	K	K	K	K	W	K	W	K	K	K	K	K	K	K	K	K	K	K	K	K	K	K	K	K	K	K	K	K	K	K
BOPA1_6117-1507	2H	76.7705	2H	88.04	K	K	W	M	K	K	K	K	K	K	K	K	K	K	K	K	K	K	K	W	K	W	K	K	K	K	K	K	K	K	K	K	K	K	K	K	K	K	K	K	K	K	K	K	K
BOPA1_ABC09163-1-3-313	2H	76.7705	2H	88.04	K	K	W	W	K	K	K	K	K	K	K	K	K	K	K	K	K	K	K	W	K	W	K	K	K	K	K	K	K	K	K	K	K	K	K	K	K	K	K	K	K	K	K	K	K
SCRI_RS_171032	2H	79.3909	2H	90.64	K	K	W	M	K	K	K	K	K	K	K	K	K	K	K	K	K	K	K	W	K	W	K	K	K	K	K	K	K	K	K	K	K	K	K	K	K	K	K	K	K	K	K	K	K
BOPA1_2371-950	2H	79.8867	2H	90.99	K	K	W	W	K	K	K	K	K	K	K	K	K	K	K	K	K	K	K	W	K	W	K	K	K	K	K	K	K	K	K	K	K	K	K	K	K	K	K	K	K	K	K	K	K
SCRI_RS_91810	2H	79.8867	2H	90.99	K	K	W	W	K	K	K	K	K	K	K	K	K	K	K	K	K	K	K	W	K	W	K	K	K	K	K	K	K	K	K	K	K	K	K	K	K	K	K	K	K	K	K	K	K
BOPA2_12_30897	2H	80.0283	2H	91.09	K	K	K	M	K	K	K	K	K	K	K	K	K	K	K	K	K	K	K	K	K	W	K	K	K	K	K	K	K	K	K	K	K	K	K	K	K	K	K	K	K	K	K	K	K
SCRI_RS_88704	2H	80.0283	2H	91.09	K	K	K	M	K	K	K	K	K	K	K	K	K	K	K	K	K	K	K	K	K	W	K	K	K	K	K	K	K	K	K	K	K	K	K	K	K	K	K	K	K	K	K	K	K
SCRI_RS_196853	2H	80.0283	2H	91.09	K	K	K	M	K	K	K	K	K	K	K	K	K	K	K	K	K	K	K	K	K	W	K	K	K	K	K	K	K	K	K	K	K	K	K	K	K	K	K	K	K	K	K	K	K
SCRI_RS_165473	2H	80.0283	-	-	K	K	K	W	K	K	K	K	K	K	K	K	K	K	K	K	K	K	K	K	K	W	K	K	K	K	K	K	K	K	K	K	K	K	K	K	K	K	K	K	K	K	K	K	K
SCRI_RS_3376	2H	80.949	2H	92.07	K	K	K	M	K	K	K	K	K	K	K	K	K	K	K	K	K	K	K	K	K	W	K	K	K	K	K	K	K	K	K	K	K	K	K	K	K	K	K	K	K	K	K	K	K
SCRI_RS_221886	2H	80.949	2H	92.07	K	K	K	M	K	K	K	K	K	K	K	K	K	K	K	K	K	K	K	K	K	W	K	K	K	K	K	K	K	K	K	K	K	K	K	K	K	K	K	K	K	K	K	K	K
SCRI_RS_180028	2H	81.2323	2H	92.37	K	K	K	M	K	K	K	K	K	K	K	K	K	K	K	K	K	K	K	K	K	W	K	K	K	K	K	K	K	K	K	K	K	K	K	K	K	K	K	K	K	K	K	K	K
BOPA1_3469-1152	2H	81.5156	2H	92.8	K	K	K	W	K	K	K	K	K	K	K	K	K	K	K	K	K	K	K	K	K	W	K	K	K	K	K	K	K	K	K	K	K	K	K	K	K	K	K	K	K	K	K	K	K
SCRI_RS_156090	2H	81.5156	2H	92.8	K	K	K	M	K	K	K	K	K	K	K	K	K	K	K	K	K	K	K	K	K	W	K	K	K	K	K	K	K	K	K	K	K	K	K	K	K	K	K	K	K	K	K	K	K
SCRI_RS_160616	2H	81.5156	2H	92.8	K	K	K	M	K	K	K	K	K	K	K	K	K	K	K	K	K	K	K	K	K	W	K	K	K	K	K	K	K	K	K	K	K	K	K	K	K	K	K	K	K	K	K	K	K
SCRI_RS_198603	2H	81.5156	2H	92.8	K	K	K	W	K	K	K	K	K	K	K	K	K	K	K	K	K	K	K	K	K	W	K	K	K	K	K	K	K	K	K	K	K	K	K	K	K	K	K	K	K	K	K	K	K
SCRI_RS_160833	2H	81.5156	2H	92.8	K	K	K	M	K	K	K	K	K	K	K	K	K	K	K	K	K	K	K	K	K	W	K	K	K	K	K	K	K	K	K	K	K	K	K	K	K	K	K	K	K	K	K	K	K
SCRI_RS_188339	2H	81.7989	2H	93.1	K	K	K	M	K	K	K	K	K	K	K	K	K	K	K	K	K	K	K	K	K	W	K	K	K	K	K	K	K	K	K	K	K	K	K	K	K	K	K	K	K	K	K	K	K
SCRI_RS_208760	2H	81.7989	2H	93.1	K	K	K	W	K	K	K	K	K	K	K	K	K	K	K	K	K	K	K	K	K	W	K	K	K	K	K	K	K	K	K	K	K	K	K	K	K	K	K	K	K	K	K	K	K
SCRI_RS_237481	2H	82.5071	2H	93.83	K	K	K	W	K	K	K	K	K	K	K	K	K	K	K	K	K	K	K	K	K	W	K	K	K	K	K	K	K	K	K	K	K	K	K	K	K	K	K	K	K	K	K	K	K
SCRI_RS_174800	2H	82.5071	2H	93.83	K	K	K	M	K	K	K	K	K	K	K	K	K	K	K	K	K	K	K	K	K	W	K	K	K	K	K	K	K	K	K	K	K	K	K	K	K	K	K	K	K	K	K	K	K
SCRI_RS_182039	2H	82.5071	2H	93.83	K	K	K	M	K	K	K	K	K	K	K	K	K	K	K	K	K	K	K	K	K	W	K	K	K	K	K	K	K	K	K	K	K	K	K	K	K	K	K	K	K	K	K	K	K
SCRI_RS_155456	2H	82.5071	2H	93.83	K	K	K	W	K	K	K	K	K	K	K	K	K	K	K	K	K	K	K	K	K	W	K	K	K	K	K	K	K	K	K	K	K	K	K	K	K	K	K	K	K	K	K	K	K
SCRI_RS_119261	2H	82.5071	2H	93.83	K	K	K	M	K	K	K	K	K	K	K	K	K	K	K	K	K	K	K	K	K	W	K	K	K	K	K	K	K	K	K	K	K	K	K	K	K	K	K	K	K	K	K	K	K
SCRI_RS_176114	2H	82.5071	2H	93.83	K	K	K	M	K	K	K	K	K	K	K	K	K	K	K	K	K	K	K	K	K	W	K	K	K	K	K	K	K	K	K	K	K	K	K	K	K	K	K	K	K	K	K	K	K
SCRI_RS_211894	2H	82.5071	2H	93.83	K	K	K	W	K	K	K	K	K	K	K	K	K	K	K	K	K	K	K	K	K	W	K	K	K	K	K	K	K	K	K	K	K	K	K	K	K	K	K	K	K	K	K	K	K
BOPA1_6024-1095	2H	82.7904	2H	93.93	K	K	K	M	K	K	K	K	K	K	K	K	K	K	K	K	K	K	K	K	K	W	K	K	K	K	K	K	K	K	K	K	K	K	K	K	K	K	K	K	K	K	K	K	K
SCRI_RS_219074	2H	82.7904	2H	95.24	K	K	K	W	K	K	K	K	K	K	K	K	K	K	K	K	K	K	M	K	K	W	K	K	K	K	K	K	K	K	K	K	K	K	K	K	K	K	K	K	K	M	K	K	K
SCRI_RS_2911	2H	86.6147	2H	99.04	K	K	K	K	K	K	K	K	K	K	K	K	K	K	K	K	K	K	K	K	K	K	K	K	K	K	K	K	K	K	K	K	K	K	K	K	K	K	K	K	K	K	K	K	K
SCRI_RS_203799	2H	86.7564	-	-	K	K	K	K	K	K	K	K	K	K	K	K	K	K	K	K	K	K	K	K	K	K	K	K	K	K	K	K	K	K	K	K	K	K	K	K	K	K	K	K	K	K	K	K	K
SCRI_RS_155722	2H	88.5269	-	-	K	K	K	K	K	K	K	K	K	K	K	K	K	K	M	K	K	K	K	K	K	K	K	K	K	K	K	K	K	K	K	K	K	K	K	K	K	K	K	K	K	K	K	K	K
SCRI_RS_165509	2H	88.5269	-	-	K	K	K	K	K	K	K	K	K	K	K	K	K	K	K	K	K	K	K	K	K	K	K	K	K	K	K	K	K	K	K	K	K	K	K	K	K	K	K	K	K	K	K	K	K
SCRI_RS_160618	2H	89.5184	-	-	K	K	K	K	K	K	K	K	K	K	K	K	K	K	K	K	K	W	K	K	K	K	K	K	K	K	K	K	K	K	K	K	K	K	K	K	K	K	K	K	K	K	K	K	K
BOPA1_1635-691	2H	89.8017	2H	101.98	K	K	K	K	K	K	K	K	K	K	K	K	K	K	K	K	K	W	K	K	K	K	K	K	K	K	K	K	K	K	K	K	K	K	K	K	K	K	K	K	K	K	K	K	K
BOPA1_ABC12856-1-1-77	2H	91.0057	2H	102.28	K	K	K	K	K	K	K	K	K	K	K	K	K	K	K	K	K	W	K	K	K	K	K	K	K	K	K	K	K	K	K	K	K	K	K	K	K	K	K	K	K	K	K	K	K
BOPA1_11660-365	2H	92.2096	2H	103.48	K	K	K	K	K	K	K	K	K	K	K	K	W	K	K	K	K	W	K	K	K	K	K	K	K	K	K	K	K	K	K	K	K	K	K	K	K	K	K	K	K	K	K	K	K
SCRI_RS_239916	2H	92.2096	-	-	K	K	W	K	K	K	K	K	K	K	K	K	W	K	K	K	K	W	K	W	K	K	K	K	K	K	K	K	K	K	K	K	K	K	K	K	K	K	K	K	K	K	K	K	K
SCRI_RS_154713	2H	92.2096	-	-	K	K	K	K	K	K	K	K	K	K	K	K	W	K	K	K	K	W	K	K	K	K	K	K	K	K	K	K	K	K	K	K	K	K	K	K	K	K	K	K	K	K	K	K	K
SCRI_RS_196862	2H	92.7762	-	-	K	K	K	K	K	K	K	K	K	K	K	K	W	K	K	K	K	W	K	K	K	K	K	K	K	K	K	K	K	K	K	K	K	K	K	K	K	K	K	K	K	K	K	K	K
BOPA1_ABC10472-1-2-247	2H	93.9802	2H	105.28	K	K	K	K	K	K	K	K	K	K	K	K	W	K	K	K	K	W	K	K	K	K	K	K	K	K	K	K	K	K	K	K	K	K	K	K	K	K	K	K	K	K	K	K	K
BOPA1_682-767	2H	94.2635	2H	105.28	K	K	K	K	K	K	K	K	K	K	K	K	W	K	K	K	K	W	K	K	K	K	K	K	K	K	K	K	K	K	K	K	K	K	K	K	K	K	K	K	K	K	K	K	K
SCRI_RS_4931	2H	94.2635	-	-	K	K	W	K	K	K	K	K	K	K	K	K	W	K	K	K	K	W	K	W	K	K	K	K	K	K	K	K	K	K	K	K	K	K	K	K	K	K	K	K	K	K	K	K	K
SCRI_RS_196270	2H	94.4051	2H	106.4	K	K	K	K	K	K	K	K	K	K	K	K	W	K	K	K	K	W	K	K	K	K	K	K	K	K	K	K	K	K	K	K	K	K	K	K	K	K	K	K	K	K	K	K	K
SCRI_RS_159484	2H	94.5467	2H	106.5	K	K	W	K	K	K	K	K	K	K	K	K	W	K	K	K	K	W	K	W	K	K	K	K	K	K	K	K	K	K	K	K	K	K	K	K	K	K	K	K	K	K	K	K	K
SCRI_RS_173374	2H	94.5467	2H	106.5	K	K	W	K	K	K	K	K	K	K	K	K	W	K	K	K	K	W	K	W	K	K	K	K	K	K	K	K	K	K	K	K	K	K	K	K	K	K	K	K	K	K	K	K	K
SCRI_RS_150494	2H	94.6884	2H	106.7	K	K	W	K	K	K	K	K	K	K	K	K	W	K	K	K	K	W	K	W	K	K	K	K	K	K	K	K	K	K	K	K	K	K	K	K	K	K	K	K	K	K	K	K	K
SCRI_RS_142188	2H	94.83	2H	106.8	K	K	W	K	K	K	K	K	K	K	K	K	W	K	K	K	K	W	K	W	K	K	K	K	K	K	K	K	K	K	K	K	K	K	K	K	K	K	K	K	K	K	K	K	K
SCRI_RS_221763	2H	94.9008	2H	106.9	K	K	W	K	K	K	K	K	K	K	K	K	W	K	K	K	K	W	K	W	K	K	K	K	K	K	K	K	K	K	K	K	K	K	K	K	K	K	K	K	K	K	K	K	K
SCRI_RS_196842	2H	94.9008	2H	106.9	K	K	W	K	K	K	K	K	K	K	K	K	W	K	K	K	K	W	K	W	K	K	K	K	K	K	K	K	K	K	K	K	K	K	K	K	K	K	K	K	K	K	K	K	K
SCRI_RS_170162	2H	94.9008	-	-	K	K	K	K	K	K	K	K	K	K	K	K	W	K	K	K	K	W	K	K	K	K	K	K	K	K	K	K	K	K	K	K	K	K	K	K	K	K	K	K	K	K	K	K	K
SCRI_RS_209622	2H	94.9008	-	-	K	K	W	K	K	K	K	K	K	K	K	K	W	K	K	K	K	W	K	W	K	K	K	K	K	K	K	K	K	K	K	K	K	K	K	K	K	K	K	K	K	K	K	K	K
SCRI_RS_140972	2H	94.9008	-	-	K	K	K	K	K	K	K	K	K	K	K	K	W	K	K	K	K	W	K	K	K	K	K	K	K	K	K	K	K	K	K	K	K	K	K	K	K	K	K	K	K	K	K	K	K
SCRI_RS_153793	2H	97.8045	2H	109.8	K	K	K	K	K	K	K	K	K	K	K	K	W	K	K	K	K	W	K	K	K	K	K	K	K	K	K	K	K	K	K	K	K	K	K	K	K	K	K	K	K	K	K	K	K
BOPA1_3180-1771	2H	106.445	2H	126.63	K	K	K	K	K	K	K	K	K	K	K	K	K	K	K	K	K	K	K	K	K	K	K	K	K	K	K	K	K	K	K	K	K	K	K	K	K	K	K	K	K	K	K	K	K
SCRI_RS_223885	2H	106.445	2H	126.23	K	K	K	K	K	K	K	K	K	K	K	K	K	K	K	K	K	K	K	K	K	K	K	K	K	K	K	K	K	K	K	K	K	K	K	K	K	K	K	K	K	K	K	K	K
BOPA1_7487-390	2H	106.445	2H	125.56	K	K	K	K	K	K	K	K	K	K	K	K	K	K	K	K	K	K	K	K	K	K	K	K	K	K	K	K	K	K	K	K	K	K	K	K	K	K	K	K	K	K	K	K	K
SCRI_RS_918	2H	106.799	2H	126.63	K	K	K	K	K	K	K	K	K	K	K	K	K	K	K	K	K	K	K	K	K	K	K	K	K	K	K	K	K	K	K	K	K	K	K	K	K	K	K	K	K	K	K	K	K
BOPA1_ABC09941-1-1-100	2H	107.011	2H	125.76	K	K	K	K	K	K	K	K	K	K	K	K	K	K	K	K	K	K	K	K	K	K	K	K	K	K	K	K	K	K	K	K	K	K	K	K	K	K	K	K	K	K	K	K	K
SCRI_RS_224624	2H	107.153	2H	125.76	K	K	K	K	K	K	K	K	K	K	K	K	K	K	K	K	K	K	K	K	K	K	K	K	K	K	K	K	K	K	K	K	K	K	K	K	K	K	K	K	K	K	K	K	K
BOPA1_ABC05640-1-1-248	2H	107.153	2H	125.76	K	K	K	K	K	K	K	K	K	K	K	K	K	K	K	K	K	K	K	K	K	K	K	K	K	K	K	K	K	K	K	K	K	K	K	K	K	K	K	K	K	K	K	K	K
BOPA1_866-442	2H	107.365	2H	125.76	K	K	K	K	K	K	K	K	K	K	K	K	K	K	K	K	K	K	K	K	K	K	K	K	K	K	K	K	K	K	K	K	K	K	K	K	K	K	K	K	K	K	K	K	K
SCRI_RS_158091	2H	107.932	2H	126.46	K	K	K	K	K	K	K	K	K	K	K	K	K	K	K	K	K	K	K	K	K	K	K	K	K	K	K	K	K	K	K	K	K	K	K	K	K	K	K	K	K	K	K	K	K
SCRI_RS_229405	2H	108.215	-	-	K	K	K	K	K	K	K	K	K	K	K	K	K	K	K	K	K	K	K	K	K	K	K	K	K	K	K	K	K	K	K	K	K	K	K	K	K	K	K	K	K	K	K	K	K
SCRI_RS_238606	2H	109.278	2H	129.47	K	K	K	K	K	K	K	K	K	K	K	K	K	K	K	K	K	K	K	K	K	K	K	K	K	K	K	K	K	K	K	K	K	K	K	K	K	K	K	K	K	K	K	K	K
BOPA1_3763-595	2H	109.419	2H	131.66	K	K	K	K	K	K	K	K	K	K	K	K	K	K	K	K	K	K	K	K	K	K	K	K	K	K	K	K	K	K	K	K	K	K	K	K	K	K	K	K	K	K	K	K	K
SCRI_RS_151349	2H	109.419	2H	131.66	K	K	K	K	K	K	K	K	K	K	K	K	K	K	K	K	K	K	K	K	K	K	K	K	K	K	K	K	K	K	K	K	K	K	K	K	K	K	K	K	K	K	K	K	K
BOPA1_7576-818	2H	110.482	2H	133.86	K	K	K	K	K	K	K	K	K	K	K	K	K	K	K	K	K	K	K	K	K	K	K	K	K	K	K	K	K	K	K	K	K	K	K	K	K	K	K	K	K	K	K	K	K
SCRI_RS_164608	2H	111.119	2H	134.46	K	K	K	K	K	K	K	K	K	K	K	K	K	K	K	K	K	K	K	K	K	K	K	K	K	K	K	K	K	K	K	K	K	K	K	K	K	K	K	K	K	K	K	K	K
SCRI_RS_144379	2H	111.261	2H	134.66	K	K	K	K	K	K	K	K	K	K	K	K	K	K	K	K	K	K	K	K	K	K	K	K	K	K	K	K	K	K	K	K	K	K	K	K	K	K	K	K	K	K	K	K	K
SCRI_RS_183064	2H	112.323	2H	135.66	K	K	K	K	K	K	K	K	K	K	K	K	K	K	K	K	K	K	K	K	K	K	K	K	K	K	K	K	K	K	K	K	K	K	K	K	K	K	K	K	K	K	K	K	K
SCRI_RS_142593	2H	112.323	2H	135.66	K	K	K	K	K	K	K	K	K	K	K	K	K	K	K	K	K	K	K	K	K	K	K	K	K	K	K	K	K	K	K	K	K	K	K	K	K	K	K	K	K	K	K	K	K
BOPA1_7302-240	2H	113.314	2H	136.66	K	K	K	K	K	K	K	K	K	K	K	K	K	K	K	K	K	K	K	K	K	K	K	K	K	K	K	K	K	K	K	K	K	K	K	K	K	K	K	K	K	K	K	K	K
BOPA1_1381-547	2H	113.527	2H	137.44	K	K	K	K	K	K	K	K	K	K	K	K	K	K	K	K	K	K	K	K	K	K	K	K	K	K	K	K	K	K	K	K	K	K	K	K	K	K	K	K	K	K	K	K	K
BOPA1_3256-1196	2H	113.527	2H	137.44	K	K	K	K	K	K	K	K	K	K	K	K	K	K	K	K	K	K	K	K	K	K	K	K	K	K	K	K	K	K	K	K	K	K	K	K	K	K	K	K	K	K	K	K	K
SCRI_RS_174214	2H	113.527	2H	137.44	K	K	K	K	K	K	K	K	K	K	K	K	K	K	K	K	K	K	K	K	K	K	K	K	K	K	K	K	K	K	K	K	K	K	K	K	K	K	K	K	K	K	K	K	K
SCRI_RS_155161	2H	113.527	2H	137.44	K	K	K	K	K	K	K	K	K	K	K	K	K	K	K	K	K	K	K	K	K	K	K	K	K	K	K	K	K	K	K	K	K	K	K	K	K	K	K	K	K	K	K	K	K
BOPA1_ABC16258-1-1-77	2H	113.527	2H	138.54	K	K	K	K	K	K	K	K	K	K	K	K	K	K	K	K	K	K	K	K	K	K	K	K	K	K	K	K	K	K	K	K	K	K	K	K	K	K	K	K	K	K	K	K	K
SCRI_RS_200033	2H	113.881	2H	137.93	K	K	K	K	K	K	K	K	K	K	K	K	K	K	K	K	K	K	K	K	K	K	K	K	K	K	K	K	K	K	K	K	K	K	K	K	K	K	K	K	K	K	K	K	K
SCRI_RS_173490	2H	113.881	-	-	K	K	K	K	K	K	K	K	K	K	K	K	K	K	K	K	K	K	K	K	K	K	K	K	K	K	K	K	K	K	K	K	K	K	K	K	K	K	K	K	K	K	K	K	K
BOPA2_12_30636	2H	113.952	2H	138.03	K	K	K	K	K	K	K	K	K	K	K	K	K	K	K	K	K	K	K	K	K	K	K	K	K	K	K	K	K	K	K	K	K	K	K	K	K	K	K	K	K	K	K	K	K
SCRI_RS_130279	2H	114.093	2H	138.13	K	K	K	K	K	K	K	K	K	K	K	K	K	K	K	K	K	K	K	K	K	K	K	K	K	K	K	K	K	K	K	K	K	K	K	K	K	K	K	K	K	K	K	K	K
SCRI_RS_130285	2H	114.093	2H	138.13	K	K	K	K	K	K	K	K	K	K	K	K	K	K	K	K	K	K	K	K	K	K	K	K	K	K	K	K	K	K	K	K	K	K	K	K	K	K	K	K	K	K	K	K	K
SCRI_RS_209218	2H	114.235	2H	138.23	K	K	K	K	K	K	K	K	K	K	K	K	K	K	K	K	K	K	K	K	K	K	K	K	K	K	K	K	K	K	K	K	K	K	K	K	K	K	K	K	K	K	K	K	K
SCRI_RS_224454	2H	114.235	2H	138.23	K	K	K	K	K	K	K	K	K	K	K	K	K	K	K	K	K	K	K	K	K	K	K	K	K	K	K	K	K	K	K	K	K	K	K	K	K	K	K	K	K	K	K	K	K
SCRI_RS_116193	2H	114.66	2H	138.73	K	K	K	K	M	K	K	M	K	K	K	K	K	K	K	K	K	K	M	M	K	K	K	K	K	K	K	M	K	K	K	K	K	K	K	K	K	K	K	M	M	K	K	K	M
SCRI_RS_7392	2H	115.368	-	-	K	K	K	K	K	K	K	K	K	K	K	K	K	K	K	K	K	K	K	K	K	K	K	K	K	K	K	K	K	K	K	K	K	K	K	K	K	K	K	K	K	K	K	K	K
BOPA1_9701-925	2H	117.989	2H	142.03	K	K	K	K	K	K	K	K	K	K	K	K	K	K	K	K	K	K	W	K	K	K	K	K	K	K	K	K	K	K	K	K	K	K	K	K	K	K	K	K	K	K	K	K	K
SCRI_RS_211291	2H	117.989	2H	142.03	K	K	K	K	K	K	K	K	K	K	K	K	K	K	K	K	K	K	W	K	K	K	K	K	K	K	K	K	K	K	K	K	K	K	K	K	K	K	K	K	K	K	K	K	K
BOPA2_12_20183	2H	118.697	2H	143.1	K	K	K	K	K	K	K	K	K	K	K	K	K	K	K	K	K	K	W	K	K	K	K	K	K	K	K	K	K	K	K	K	K	K	K	K	K	K	K	K	K	K	K	K	K
BOPA1_8817-798	2H	118.697	2H	143.07	K	K	K	K	K	K	K	K	K	K	K	K	K	K	K	K	K	K	W	K	K	K	K	K	K	K	K	K	K	K	K	K	K	K	K	K	K	K	K	K	K	K	K	K	K
BOPA1_2464-1228	2H	119.759	2H	144.2	K	K	K	K	K	K	K	K	K	K	K	K	K	K	K	K	K	K	W	K	K	K	K	K	K	K	K	K	K	K	K	K	K	K	K	K	K	K	K	K	K	K	K	K	K
BOPA2_12_30690	2H	119.759	2H	144.2	K	K	K	K	K	K	K	K	K	K	K	K	K	K	K	K	K	K	W	K	K	K	K	K	K	K	K	K	K	K	K	K	K	K	K	K	K	K	K	K	K	K	K	K	K
SCRI_RS_139840	2H	119.759	2H	144.2	K	K	K	K	K	K	K	K	K	K	K	K	K	K	K	K	K	K	W	K	K	K	K	K	K	K	K	K	K	K	K	K	K	K	K	K	K	K	K	K	K	K	K	K	K
SCRI_RS_2552	2H	120.042	2H	144.4	K	K	K	K	K	K	K	K	K	K	K	K	K	K	K	K	K	K	W	K	K	K	K	K	K	K	K	K	K	K	K	K	K	K	K	K	K	K	K	K	K	K	K	K	K
SCRI_RS_209551	2H	120.68	2H	145.1	K	K	K	K	K	K	K	K	K	K	K	K	K	K	K	K	K	K	W	K	K	K	K	K	K	K	K	K	K	K	K	K	K	K	K	K	K	K	K	K	K	K	K	K	K
BOPA1_6652-209	2H	120.751	2H	145.2	K	K	K	K	K	K	K	K	K	K	K	K	K	K	K	K	K	K	W	K	K	K	K	K	K	K	K	K	K	K	K	K	K	K	K	K	K	K	K	K	K	K	K	K	K
SCRI_RS_124541	2H	120.751	2H	145.2	K	K	K	K	K	K	K	K	K	K	K	K	K	K	K	K	K	K	W	K	K	K	K	K	K	K	K	K	K	K	K	K	K	K	K	K	K	K	K	K	K	K	K	K	K
SCRI_RS_175783	2H	120.751	2H	145.2	K	K	K	K	K	K	K	K	K	K	K	K	K	K	K	K	K	K	W	K	K	K	K	K	K	K	K	K	K	K	K	K	K	K	K	K	K	K	K	K	K	K	K	K	K
BOPA2_12_30678	2H	120.963	2H	145.4	K	K	K	K	K	K	K	K	K	K	K	K	K	K	K	K	K	K	W	K	K	K	K	K	K	K	K	K	K	K	K	K	K	K	K	K	K	K	K	K	K	M	K	K	K
SCRI_RS_231021	2H	120.963	2H	145.4	K	K	K	K	K	K	K	K	K	K	K	K	K	K	K	K	K	K	W	K	K	K	K	K	K	K	K	K	K	K	K	K	K	K	K	K	K	K	K	K	K	M	K	K	K
SCRI_RS_6458	2H	123.654	2H	148.1	K	K	K	K	K	K	K	K	K	K	K	K	K	K	K	K	K	K	W	K	K	K	K	K	K	K	K	K	K	K	K	K	K	K	K	K	K	K	K	K	K	K	K	K	K
BOPA1_4241-445	2H	123.654	2H	152.83	K	K	K	K	K	K	K	K	K	K	K	K	K	K	K	K	K	K	W	K	K	K	K	K	K	K	K	K	K	K	K	K	K	K	K	K	K	K	K	K	K	M	K	K	K
SCRI_RS_221939	2H	123.654	-	-	K	K	K	K	K	K	K	K	K	K	K	K	K	K	K	K	K	K	M	K	K	K	K	K	K	K	K	K	K	K	K	K	K	K	K	K	K	K	K	K	K	M	K	K	K
SCRI_RS_138045	2H	123.654	-	-	K	K	K	K	K	K	K	K	K	K	K	K	K	K	K	K	K	K	W	K	K	K	K	K	K	K	K	K	K	K	K	K	K	K	K	K	K	K	K	K	K	K	K	K	K
SCRI_RS_238605	2H	123.938	2H	148.3	K	K	K	K	K	K	K	K	K	K	K	K	K	K	K	K	K	K	W	K	K	K	K	K	K	K	K	K	K	K	K	K	K	K	K	K	K	K	K	K	K	K	K	K	K
BOPA1_2822-739	2H	124.292	2H	148.7	K	K	K	K	K	K	K	K	K	K	K	K	K	K	K	K	K	K	W	K	K	K	K	K	K	K	K	K	K	K	K	K	K	K	K	K	K	K	K	K	K	K	K	K	K
SCRI_RS_181112	2H	124.646	2H	149	K	K	K	K	K	K	K	K	K	K	K	K	K	K	K	K	K	K	W	K	K	K	K	K	K	K	K	K	K	K	K	K	K	K	K	K	K	K	K	K	K	K	K	K	K
SCRI_RS_182627	2H	124.646	2H	149	K	K	K	K	K	K	K	K	K	K	K	K	K	K	K	K	K	K	W	K	K	K	K	K	K	K	K	K	K	K	K	K	K	K	K	K	K	K	K	K	K	K	K	K	K
SCRI_RS_202469	2H	124.646	2H	149	K	K	K	K	K	K	K	K	K	K	K	K	K	K	K	K	K	K	W	K	K	K	K	K	K	K	K	K	K	K	K	K	K	K	K	K	K	K	K	K	K	K	K	K	K
SCRI_RS_134241	2H	125.354	2H	149.8	K	K	K	K	K	K	K	K	K	K	K	K	K	K	K	K	K	K	W	K	K	K	K	K	K	K	K	K	K	K	K	K	K	K	K	K	K	K	K	K	K	M	K	K	K
SCRI_RS_204022	2H	125.85	2H	150.2	K	K	K	K	K	K	K	K	K	K	K	K	K	K	K	K	K	K	W	K	K	K	K	K	K	K	K	K	K	K	K	K	K	K	K	K	K	K	K	K	K	K	K	K	K
SCRI_RS_11645	2H	127.054	2H	151.5	K	K	K	K	K	K	K	K	K	K	K	K	K	K	K	K	K	K	W	K	K	K	K	K	K	K	K	K	K	K	K	K	K	K	K	K	K	K	K	K	K	K	K	K	K
SCRI_RS_136379	2H	127.195	2H	151.6	K	K	K	K	K	K	K	K	K	K	K	K	K	K	K	K	K	K	W	K	K	K	K	K	K	K	K	K	K	K	K	K	K	K	K	K	K	K	K	K	K	M	K	K	K
SCRI_RS_133224	2H	127.195	-	-	K	K	K	K	K	K	K	K	K	K	K	K	K	K	K	K	K	K	W	K	K	K	K	K	K	K	K	K	K	K	K	K	K	K	K	H	K	K	K	K	K	K	K	K	K
SCRI_RS_193100	2H	127.266	2H	151.7	K	K	K	K	K	K	K	K	K	K	K	K	K	K	K	K	K	K	W	K	K	K	K	K	K	K	K	K	K	K	K	K	K	K	K	K	K	K	K	K	K	K	K	K	K
BOPA1_7826-869	2H	129.32	2H	155.26	K	K	K	K	K	K	K	K	K	K	K	K	K	K	K	K	K	K	W	K	K	K	K	K	K	K	K	K	K	K	K	K	K	K	K	K	K	K	K	K	K	K	K	K	K
BOPA1_3608-2133	2H	129.745	2H	155.66	K	K	K	K	K	K	K	K	K	K	K	K	K	K	K	K	K	K	W	K	K	K	K	K	K	K	K	K	K	K	K	K	K	K	K	K	K	K	K	K	K	K	K	K	K
BOPA1_6990-661	2H	129.816	2H	155.66	K	K	K	K	K	K	K	K	K	K	K	K	K	K	K	K	K	K	W	K	K	K	K	K	K	K	K	K	K	K	K	K	K	K	K	K	K	K	K	K	K	K	K	K	K
SCRI_RS_158072	2H	131.02	2H	156.52	K	K	K	K	K	K	K	K	K	K	K	K	K	K	K	K	K	K	W	K	K	K	K	K	K	K	K	K	K	K	K	K	K	K	K	K	K	K	K	K	K	K	K	K	K
SCRI_RS_179544	2H	131.02	2H	156.52	K	K	K	K	K	K	K	K	K	K	K	K	K	K	K	K	K	K	W	K	K	K	K	K	K	K	K	K	K	K	K	K	K	K	K	K	K	K	K	K	K	K	K	K	K
BOPA2_12_20027	2H	132.153	2H	157.42	K	K	K	K	K	K	K	K	K	K	K	K	K	K	K	K	K	K	W	K	K	K	K	K	K	K	K	K	K	K	K	K	K	K	K	K	K	K	K	K	K	K	K	K	K
BOPA1_4240-749	2H	132.578	2H	157.42	K	K	K	K	K	K	K	K	K	K	K	K	K	K	K	K	K	K	W	K	K	K	K	K	K	K	K	K	K	K	K	K	K	K	K	K	K	K	K	K	K	K	K	K	K
SCRI_RS_740	2H	132.578	2H	157.42	K	K	K	K	K	K	K	K	K	K	K	K	K	K	K	K	K	K	W	K	K	K	K	K	K	K	K	K	K	K	K	K	K	K	K	K	K	K	K	K	K	K	K	K	K
SCRI_RS_230951	2H	132.578	2H	157.42	K	K	K	K	K	K	K	K	K	K	K	K	K	K	K	K	K	K	W	K	K	K	K	K	K	K	K	K	K	K	K	K	K	K	K	K	K	K	K	K	K	K	K	K	K
BOPA1_3179-497	2H	132.578	2H	157.42	K	K	K	K	K	K	K	K	K	K	K	K	K	K	K	K	K	K	W	K	K	K	K	K	K	K	K	K	K	K	K	K	K	K	K	K	K	K	K	K	K	K	K	K	K
BOPA1_6157-1233	2H	132.578	2H	157.42	K	K	K	K	K	K	K	K	K	K	K	K	K	K	K	K	K	K	W	K	K	K	K	K	K	K	K	K	K	K	K	K	K	K	K	K	K	K	K	K	K	K	K	K	K
BOPA2_12_30914	2H	132.578	2H	157.42	K	K	K	K	K	K	K	K	K	K	K	K	K	K	K	K	K	K	W	K	K	K	K	K	K	K	K	K	K	K	K	K	K	K	K	K	K	K	K	K	K	K	K	K	K
BOPA2_12_31209	2H	132.578	2H	157.42	K	K	K	K	K	K	K	K	K	K	K	K	K	K	K	K	K	K	W	K	K	K	K	K	K	K	K	K	K	K	K	K	K	K	K	K	K	K	K	K	K	K	K	K	K
SCRI_RS_13322	2H	132.578	-	-	K	K	K	K	K	K	K	K	K	K	K	K	K	K	K	K	K	K	W	K	K	K	K	K	K	K	K	K	K	K	K	K	K	K	K	K	K	K	K	K	K	K	K	K	K
SCRI_RS_208720	2H	132.578	-	-	K	M	K	K	K	K	K	K	K	K	K	K	K	K	M	K	K	M	W	K	M	K	M	K	K	M	K	K	M	K	M	M	K	K	M	K	H	M	K	K	K	K	K	M	K
SCRI_RS_232698	2H	132.578	-	-	K	K	K	K	K	K	K	K	K	K	K	K	K	K	K	K	K	K	W	K	K	K	K	K	K	K	K	K	K	K	K	K	K	K	K	K	K	K	K	K	K	K	K	K	K
BOPA1_3910-1648	2H	133.286	2H	158.11	K	K	K	K	K	K	K	K	K	K	K	K	K	K	K	K	K	K	W	K	K	K	K	K	K	K	K	K	K	K	K	K	K	K	K	K	K	K	K	K	K	K	K	K	K
BOPA1_3840-348	2H	133.286	2H	157.76	K	K	K	K	K	K	K	K	K	K	K	K	K	K	K	K	K	K	W	K	K	K	K	K	K	K	K	K	K	K	K	K	K	K	K	K	K	K	K	K	K	K	K	K	K
SCRI_RS_168471	2H	133.286	-	-	K	K	K	K	K	K	K	K	K	K	K	K	K	K	K	K	K	K	W	K	K	K	K	K	K	K	K	K	K	K	K	K	K	K	K	K	K	K	K	K	K	K	K	K	K
BOPA2_12_10487	2H	135.623	2H	160.69	K	K	K	K	K	K	K	K	K	K	K	K	K	K	K	K	K	K	W	K	K	K	K	K	K	K	K	K	K	K	K	K	K	K	K	K	K	K	K	K	K	K	K	K	K
SCRI_RS_156155	2H	135.623	2H	160.69	K	K	K	K	K	K	K	K	K	K	K	K	K	K	K	K	K	K	W	K	K	K	K	K	K	K	K	K	K	K	K	K	K	K	K	K	K	K	K	K	K	K	K	K	K
SCRI_RS_233261	2H	135.623	2H	160.69	K	K	K	K	K	K	K	K	K	K	K	K	K	K	K	K	K	K	W	K	K	K	K	K	K	K	K	K	K	K	K	K	K	K	K	K	K	K	K	K	K	K	K	K	K
SCRI_RS_138320	2H	135.765	2H	161.86	K	K	K	K	K	K	K	K	K	K	K	K	K	K	K	K	K	K	W	K	K	K	K	K	K	K	K	K	K	K	K	K	K	K	K	K	K	K	K	K	K	K	K	K	K
SCRI_RS_222342	2H	136.048	2H	162.06	K	K	K	K	K	K	K	K	K	K	K	K	K	K	K	K	K	K	W	K	K	K	K	K	K	K	K	K	K	K	K	K	K	K	K	K	K	K	K	K	K	K	K	K	K
SCRI_RS_175216	2H	136.048	2H	162.06	K	K	K	K	K	K	K	K	K	K	K	K	K	K	K	K	K	K	W	K	K	K	K	K	K	K	K	K	K	K	K	K	K	K	K	K	K	K	K	K	K	K	K	K	K
BOPA1_ABC17314-1-1-226	2H	136.048	2H	161.26	K	K	K	K	K	K	K	K	K	K	K	K	K	K	K	K	K	K	W	K	K	K	K	K	K	K	K	K	K	K	K	K	K	K	K	K	K	K	K	K	K	K	K	K	K
SCRI_RS_186925	2H	136.048	-	-	K	K	K	K	K	K	K	K	K	K	K	K	K	K	K	K	K	K	W	K	K	K	K	K	K	K	K	K	K	K	K	K	K	K	K	K	K	K	K	K	K	K	K	K	K
BOPA1_8586-1221	2H	138.031	2H	163.46	K	K	K	K	K	K	K	K	K	K	K	K	K	K	K	K	K	K	W	K	K	K	K	K	K	K	K	K	K	K	K	K	K	K	K	K	K	K	K	K	K	K	K	K	K
SCRI_RS_194653	2H	138.598	2H	164.36	K	K	K	K	K	K	K	K	K	K	K	K	K	K	K	K	K	K	W	K	K	K	K	K	K	K	K	K	K	K	K	K	K	K	K	K	K	K	K	K	K	K	K	K	K
SCRI_RS_156819	2H	138.598	2H	164.36	K	K	K	K	K	K	K	K	K	K	K	K	K	K	K	K	K	K	W	K	K	K	K	K	K	K	K	K	K	K	K	K	K	K	K	K	K	K	K	K	K	K	K	K	K
SCRI_RS_174037	2H	138.598	-	-	K	K	K	K	K	K	K	K	K	K	K	K	K	K	K	K	K	K	W	K	K	K	K	K	K	K	K	K	K	K	K	K	K	K	K	K	K	K	K	K	K	K	K	K	K
SCRI_RS_139073	2H	138.598	-	-	K	K	K	K	K	K	K	K	K	K	K	K	K	K	K	K	K	K	W	K	K	K	K	K	K	K	K	K	K	K	K	K	K	K	K	K	K	K	K	K	K	K	K	K	K
SCRI_RS_134343	2H	140.51	2H	168.73	K	K	K	K	K	K	K	K	K	K	K	K	K	K	K	K	K	K	W	K	K	K	K	K	K	K	K	K	K	K	K	K	K	K	K	K	K	K	K	K	K	K	K	K	K
BOPA2_12_30823	2H	140.652	2H	168.93	K	K	K	K	K	K	K	K	K	K	K	K	K	K	K	K	K	K	H	K	K	K	K	K	K	K	K	K	K	K	K	K	K	K	K	K	K	K	K	K	K	K	K	K	K
SCRI_RS_116590	2H	140.793	2H	169.03	K	K	K	K	K	K	K	K	K	K	K	K	K	K	K	K	K	K	W	K	K	K	K	K	K	K	K	K	K	K	K	K	K	K	K	K	K	K	K	K	K	K	K	K	K
BOPA2_12_30822	2H	140.793	-	-	K	K	K	K	K	K	K	K	K	K	K	K	K	K	K	K	K	K	H	K	K	K	K	K	K	K	K	K	K	K	K	K	K	K	K	K	K	K	K	K	K	K	K	K	K
BOPA1_570-1376	2H	141.076	2H	169.59	K	K	K	K	K	K	K	K	K	K	K	K	K	K	K	K	K	K	W	K	K	K	K	K	K	K	K	K	K	K	K	K	K	K	K	K	K	K	K	K	K	K	K	K	K
SCRI_RS_200267	2H	141.076	2H	169.59	K	K	K	K	K	K	K	K	K	K	K	K	K	K	K	K	K	K	W	K	K	K	K	K	K	K	K	K	K	K	K	K	K	K	K	K	K	K	K	K	K	K	K	K	K
SCRI_RS_141500	2H	141.076	-	-	K	K	K	K	K	K	K	K	K	K	K	K	K	K	K	K	K	K	W	K	K	K	K	K	K	K	K	K	K	K	K	K	K	K	K	K	K	K	K	K	K	K	K	K	K
SCRI_RS_15119	2H	141.501	2H	169.99	K	K	K	K	K	K	K	K	K	K	K	K	K	K	K	K	K	K	W	K	K	K	K	K	K	K	K	K	K	K	K	K	K	K	K	K	K	K	K	K	K	K	K	K	K
SCRI_RS_225633	2H	142.21	2H	172.15	K	K	K	K	K	K	K	K	K	K	K	K	K	K	K	K	K	K	W	K	K	K	K	K	K	K	K	K	K	K	K	K	K	K	K	K	K	K	K	K	K	K	K	K	K
BOPA2_12_31506	2H	142.351	2H	173.33	K	K	K	K	K	K	K	K	K	K	K	K	K	K	K	K	K	K	W	K	K	K	K	K	K	K	K	K	K	K	K	K	K	K	K	K	K	K	K	K	K	K	K	K	K
SCRI_RS_73620	2H	142.635	2H	173.53	K	K	K	K	K	K	K	K	K	K	K	K	K	K	K	K	K	K	W	K	K	K	K	K	K	K	K	K	K	K	K	K	K	K	K	K	K	K	K	K	K	K	K	K	K
SCRI_RS_172136	2H	142.635	2H	173.53	K	K	K	K	K	K	K	K	K	K	K	K	K	K	K	K	K	K	W	K	K	K	K	K	K	K	K	K	K	K	K	K	K	K	K	K	K	K	K	K	K	K	K	K	K
SCRI_RS_119718	2H	143.13	2H	174.03	K	K	K	K	K	K	K	K	K	K	K	K	K	K	K	K	K	K	W	K	K	K	K	K	K	K	K	K	K	K	K	K	K	K	K	K	K	K	K	K	K	K	K	K	K
BOPA1_9910-427	2H	144.122	2H	175.48	K	K	K	K	K	K	K	K	K	K	K	K	K	K	K	K	K	K	W	K	K	K	K	K	K	K	K	K	K	K	K	K	K	K	K	K	K	K	K	K	K	K	K	K	K
SCRI_RS_227482	2H	144.122	2H	175.28	K	K	K	K	K	K	K	K	K	K	K	K	K	K	K	K	K	K	W	K	K	K	K	K	K	K	K	K	K	K	K	K	K	K	K	K	K	K	K	K	K	K	K	K	K
BOPA1_2592-1237	2H	144.263	2H	175.48	K	K	K	K	K	K	K	K	K	K	K	K	K	K	K	K	K	K	W	K	K	K	K	K	K	K	K	K	K	K	K	K	K	K	K	K	K	K	K	K	K	K	K	K	K
SCRI_RS_176159	2H	144.263	2H	175.48	K	K	K	K	K	K	K	K	K	K	K	K	K	K	K	K	K	K	W	K	K	K	K	K	K	K	K	K	K	K	K	K	K	K	K	K	K	K	K	K	K	K	K	K	K
SCRI_RS_170209	2H	144.405	2H	175.58	K	K	K	K	K	K	K	K	K	K	K	K	K	K	K	K	K	K	W	K	K	K	K	K	K	K	K	K	K	K	K	K	K	K	K	K	K	K	K	K	K	K	K	K	K
BOPA1_3450-692	2H	144.405	2H	175.48	K	K	K	K	K	K	K	K	K	K	K	K	K	K	K	K	K	K	W	K	K	K	K	K	K	K	K	K	K	K	K	K	K	K	K	K	K	K	K	K	K	K	K	K	K
SCRI_RS_161281	2H	145.609	2H	176.78	K	K	K	K	K	K	K	K	K	K	K	K	K	K	K	K	K	K	W	K	K	K	K	K	K	K	K	K	K	K	K	K	K	K	K	K	K	K	K	K	K	K	K	K	K
SCRI_RS_228319	2H	146.105	2H	177.28	K	K	K	K	K	K	K	K	K	K	K	K	K	K	K	K	K	K	W	K	K	K	K	K	K	K	K	K	K	K	K	K	K	K	K	K	K	K	K	K	K	K	K	K	K
SCRI_RS_161224	2H	146.246	2H	177.28	K	K	K	K	K	K	K	K	K	K	K	K	K	K	K	K	K	K	W	K	K	K	K	K	K	K	K	K	K	K	K	K	K	K	K	K	K	K	K	K	K	K	K	K	K
SCRI_RS_142982	2H	146.388	2H	177.38	K	K	K	K	K	K	K	K	K	K	K	K	K	K	K	K	K	K	W	K	K	K	K	K	K	K	K	K	K	K	K	K	K	K	K	K	K	K	K	K	K	K	K	K	K
SCRI_RS_139106	2H	146.388	2H	177.38	K	K	K	K	K	K	K	K	K	K	K	K	K	K	K	K	K	K	W	K	K	K	K	K	K	K	K	K	K	K	K	K	K	K	K	K	K	K	K	K	K	K	K	K	K
SCRI_RS_139115	2H	146.388	2H	177.38	K	K	K	K	K	K	K	K	K	K	K	K	K	K	K	K	K	K	W	K	K	K	K	K	K	K	K	K	K	K	K	K	K	K	K	K	K	K	K	K	K	K	K	K	K
SCRI_RS_236521	2H	146.53	2H	177.38	K	K	K	K	K	K	K	K	K	K	K	K	K	K	K	K	K	K	W	K	K	K	K	K	K	K	K	K	K	K	K	K	K	K	K	K	K	K	K	K	K	K	K	K	K
SCRI_RS_140931	2H	146.53	-	-	K	K	K	K	K	K	K	K	K	K	K	K	K	K	K	K	K	K	W	K	K	K	K	K	K	K	K	K	K	K	K	K	K	K	K	K	K	K	K	K	K	K	K	K	K
SCRI_RS_158043	2H	147.309	-	-	K	K	K	K	K	K	K	K	K	K	K	K	K	K	K	K	K	K	W	K	K	K	K	K	K	K	K	K	K	K	K	K	K	K	K	K	K	K	K	K	K	K	K	K	K
SCRI_RS_223897	2H	147.45	2H	177.38	K	K	K	K	K	K	K	K	K	K	K	K	K	K	K	K	K	W	W	K	K	K	K	K	K	K	K	K	K	K	K	K	K	K	K	K	K	K	K	K	K	K	K	K	K
SCRI_RS_134252	2H	147.734	2H	177.58	K	K	K	K	K	K	K	K	K	K	K	K	K	K	K	K	K	W	W	K	K	K	K	K	K	K	K	K	K	K	K	K	K	K	K	K	K	K	K	K	K	K	K	K	K
SCRI_RS_139737	2H	148.159	2H	178.08	K	K	K	K	K	K	K	K	K	K	K	K	K	K	K	K	K	W	W	K	K	K	K	K	K	K	K	K	K	K	K	K	K	K	K	K	K	K	K	K	K	K	K	K	K
SCRI_RS_151056	2H	149.15	2H	179.08	K	K	K	K	K	K	K	K	K	K	K	K	K	K	K	K	K	W	W	K	K	K	K	K	K	K	K	K	K	K	K	K	K	K	K	K	K	K	K	K	K	K	K	K	K
SCRI_RS_163112	2H	149.15	2H	179.08	K	K	K	K	K	K	K	K	K	K	K	K	K	K	K	K	K	W	W	K	K	K	K	K	K	K	K	K	K	K	K	K	K	K	K	K	K	K	K	K	K	K	K	K	K
SCRI_RS_156075	2H	149.15	2H	179.08	K	K	K	K	K	K	K	K	K	K	K	K	K	K	K	K	K	W	W	K	K	K	K	K	K	K	K	K	K	K	K	K	K	K	K	K	K	K	K	K	K	K	K	K	K
SCRI_RS_13386	2H	149.363	2H	179.28	K	K	K	K	K	K	K	K	K	K	K	K	K	K	K	K	K	W	W	K	K	K	K	K	K	K	K	K	K	K	K	K	K	K	K	K	K	K	K	K	K	K	K	K	K
SCRI_RS_150519	2H	149.363	-	-	K	M	K	K	K	K	K	K	K	K	K	K	K	K	M	K	K	M	W	K	K	K	K	K	K	M	K	K	M	K	K	K	K	K	M	K	K	K	K	K	K	K	K	K	K
SCRI_RS_196748	2H	149.363	-	-	K	K	K	K	K	K	K	K	K	K	K	K	K	K	K	K	K	W	W	K	K	K	K	K	K	K	K	K	K	K	K	K	K	K	K	K	K	K	K	K	K	K	K	K	K
SCRI_RS_154153	2H	149.363	-	-	K	K	K	K	K	K	K	K	K	K	K	K	K	K	K	K	K	W	W	K	K	K	K	K	K	K	K	K	K	K	K	K	K	K	K	K	K	K	K	K	K	K	K	K	K
SCRI_RS_206020	2H	149.504	2H	179.38	K	K	K	K	K	K	K	K	K	K	K	K	K	K	K	K	K	W	W	K	K	K	K	K	K	K	K	K	K	K	K	K	K	K	K	K	K	K	K	K	K	K	K	K	K
SCRI_RS_174383	3H	0	3H	3.79	M	K	K	K	K	K	K	K	K	K	K	K	K	K	K	K	K	K	K	K	K	K	K	K	K	K	K	K	K	K	K	K	K	K	K	K	K	K	K	K	K	K	K	K	K
SCRI_RS_1804	3H	0.0708215	3H	3.89	H	K	K	K	K	K	K	K	K	K	K	K	K	K	K	K	K	K	K	K	K	K	K	K	K	K	K	K	K	K	K	K	K	K	K	K	K	K	K	K	K	K	K	K	K
SCRI_RS_173491	3H	1.91218	3H	5.69	H	K	K	K	K	K	K	K	K	K	K	K	K	K	K	K	K	K	K	K	K	K	K	K	K	K	K	K	K	K	K	K	K	K	K	K	K	K	K	K	K	K	K	K	K
BOPA2_12_31230	3H	3.25779	-	-	M	K	K	K	K	K	K	K	K	K	K	K	K	K	K	K	K	K	K	K	K	K	K	K	K	K	K	K	K	K	K	K	K	K	K	K	K	K	K	K	K	K	K	K	K
BOPA1_7044-705	3H	8.28612	3H	13.53	K	K	K	K	K	K	K	K	K	K	K	K	K	K	K	K	K	K	K	K	K	K	K	K	K	K	K	K	K	K	K	K	K	K	K	K	K	K	K	K	K	K	K	K	K
SCRI_RS_127822	3H	8.28612	3H	13.68	K	K	K	K	K	K	K	K	K	K	K	K	K	K	K	K	K	K	K	K	K	K	K	K	K	K	K	K	K	K	K	K	K	K	K	K	K	K	K	K	K	K	K	K	K
SCRI_RS_127903	3H	8.28612	3H	13.68	K	K	K	K	K	K	K	K	K	K	K	K	K	K	K	K	K	K	K	K	K	K	K	K	K	K	K	K	K	K	K	K	K	K	K	K	K	K	K	K	K	K	K	K	K
BOPA1_3646-1984	3H	8.92351	3H	15.52	K	K	K	K	K	K	K	K	K	K	K	K	K	K	K	K	K	K	K	K	K	K	K	K	K	K	K	K	K	K	K	K	K	K	K	K	K	K	K	K	K	K	K	K	K
SCRI_RS_154700	3H	12.1105	-	-	K	K	K	K	K	K	K	K	K	K	K	K	K	K	K	K	K	K	K	K	K	K	K	K	K	K	K	K	K	K	K	K	K	K	K	K	K	K	K	K	K	K	K	K	K
SCRI_RS_210101	3H	12.1105	-	-	K	K	K	K	K	K	K	K	K	K	K	K	K	K	K	K	K	K	K	K	K	K	K	K	K	K	K	K	K	K	K	K	K	K	K	K	K	K	K	K	K	K	K	K	K
BOPA1_3906-558	3H	15.2975	3H	25.27	K	K	K	K	K	K	K	K	K	K	K	K	K	K	K	K	K	K	K	K	K	K	K	K	K	K	K	K	K	K	K	K	K	K	K	K	K	K	K	K	K	K	K	K	K
SCRI_RS_153718	3H	17.3513	3H	26.18	K	K	K	K	K	K	K	K	K	K	K	K	K	K	K	K	K	K	K	K	K	K	K	K	K	K	K	K	K	K	K	K	K	K	K	K	K	K	K	K	K	K	K	K	K
SCRI_RS_192352	3H	17.847	3H	26.58	K	K	K	K	K	K	K	K	K	K	K	K	K	K	K	K	K	K	K	K	K	K	K	K	K	K	K	K	K	K	K	K	K	K	K	K	K	K	K	K	K	K	K	K	K
SCRI_RS_229894	3H	20.3966	3H	28.78	K	K	K	K	K	K	K	K	K	K	K	K	K	K	K	K	K	K	K	K	K	K	K	K	K	K	K	K	K	K	K	K	K	K	K	K	K	K	K	K	K	K	K	K	K
BOPA2_12_30920	3H	20.7507	3H	28.78	K	K	K	K	K	K	K	K	K	K	K	K	K	K	K	K	K	M	K	K	K	K	K	K	K	K	K	K	K	K	K	K	K	K	K	K	K	K	K	K	K	K	K	K	K
SCRI_RS_167842	3H	23.0878	-	-	K	K	K	K	K	K	K	K	K	K	K	K	K	K	K	K	K	K	K	K	K	K	K	K	K	K	K	K	K	K	K	K	K	K	K	K	K	K	K	K	K	K	K	K	K
SCRI_RS_189757	3H	23.9377	3H	31.88	K	K	W	K	K	K	K	K	K	K	K	K	K	K	K	K	K	K	K	W	K	K	K	K	K	K	K	K	K	K	K	K	K	K	K	K	K	K	K	K	K	K	K	K	K
SCRI_RS_222975	3H	25.4958	3H	33.48	K	K	W	K	K	K	K	K	K	K	K	K	K	K	K	K	K	K	K	W	K	K	K	K	K	K	K	K	K	K	K	K	K	K	K	K	K	K	K	K	K	K	K	K	K
BOPA2_12_30192	3H	25.4958	3H	28.78	K	K	K	K	K	K	K	K	K	K	K	K	K	K	K	K	K	K	K	K	K	K	K	K	K	K	K	K	K	K	K	K	K	K	K	K	K	K	K	K	K	K	K	K	K
SCRI_RS_103614	3H	35.1275	-	-	K	K	W	K	K	K	K	K	K	K	K	K	K	K	K	K	K	K	K	W	K	K	K	K	K	K	K	K	K	K	K	K	K	K	K	K	K	K	K	K	K	K	K	K	K
SCRI_RS_4528	3H	36.4731	3H	43.82	K	K	W	M	K	K	K	K	K	K	K	K	K	K	K	K	K	K	K	W	K	K	K	K	K	K	K	K	K	K	K	K	K	K	K	K	K	K	K	K	K	K	K	K	K
SCRI_RS_180821	3H	36.7564	-	-	K	K	W	H	K	K	K	K	K	K	K	K	K	K	K	K	K	K	K	W	K	K	K	K	K	K	K	K	K	K	K	K	K	K	K	K	K	K	K	K	K	K	K	K	K
SCRI_RS_194531	3H	36.898	3H	44.22	K	K	W	H	K	K	K	K	K	K	K	K	K	K	K	K	K	K	K	W	K	K	K	K	K	K	K	K	K	K	K	K	K	K	K	K	K	K	K	K	K	K	K	K	K
SCRI_RS_6922	3H	37.3938	3H	44.72	K	K	W	M	K	K	K	K	K	K	K	K	K	K	K	K	K	K	K	W	K	K	K	K	K	K	K	K	K	K	K	K	K	K	K	K	K	K	K	K	K	K	K	K	K
SCRI_RS_198852	3H	37.6062	-	-	K	K	W	H	K	K	K	K	K	K	K	K	K	K	K	K	K	K	K	W	K	K	K	K	K	K	K	K	K	K	K	K	K	K	K	K	K	K	K	K	K	K	K	K	K
SCRI_RS_175314	3H	37.8895	3H	45.22	K	K	W	H	K	K	K	K	K	K	K	K	K	K	K	K	K	K	K	W	K	K	K	K	K	K	K	K	K	K	K	K	K	K	K	K	K	K	K	K	K	K	K	K	K
SCRI_RS_9439	3H	37.8895	3H	45.22	K	K	W	H	K	K	K	K	K	K	K	K	K	K	K	K	K	K	K	W	K	K	K	K	K	K	K	K	K	K	K	K	K	K	K	K	K	K	K	K	K	K	K	K	K
BOPA1_6156-1399	3H	38.0312	3H	45.39	K	K	H	H	K	K	K	K	K	K	K	K	K	K	K	K	K	K	K	H	K	K	K	K	K	K	K	K	K	K	K	K	K	K	K	K	K	K	K	K	K	K	K	K	K
BOPA2_12_30953	3H	38.0312	3H	45.91	K	K	W	H	K	K	K	K	K	K	K	K	K	K	K	K	K	K	K	W	K	K	K	K	K	K	K	K	K	K	K	K	K	K	K	K	K	K	K	K	K	K	K	K	K
SCRI_RS_174984	3H	38.0312	3H	45.91	K	K	W	H	K	K	K	K	K	K	K	K	K	K	K	K	K	K	K	W	K	K	K	K	K	K	K	K	K	K	K	K	K	K	K	K	K	K	K	K	K	K	K	K	K
SCRI_RS_135333	3H	38.0312	3H	45.91	K	K	W	H	K	K	K	K	K	K	K	K	K	K	K	K	K	K	K	W	K	K	K	K	K	K	K	K	K	K	K	K	K	K	K	K	K	K	K	K	K	K	K	K	K
SCRI_RS_227903	3H	39.5892	-	-	K	K	W	K	K	K	K	K	K	K	K	K	K	K	K	K	K	K	K	W	W	K	W	K	K	K	K	K	K	K	K	K	K	K	K	K	K	K	K	K	K	K	K	K	K
SCRI_RS_199987	3H	40.6516	3H	49.55	K	K	W	K	K	K	K	K	K	K	K	K	K	K	K	K	K	K	K	W	W	K	W	K	K	K	K	K	K	K	K	K	K	K	K	K	K	K	K	K	K	K	K	K	K
SCRI_RS_146425	3H	43.0595	3H	51.95	K	K	W	K	K	K	K	K	K	K	K	K	K	K	K	K	K	K	K	W	W	W	W	K	K	K	K	K	K	K	K	K	K	K	K	K	K	K	K	K	K	K	K	K	K
BOPA1_9018-522	3H	43.1303	3H	51.95	K	K	W	K	K	K	K	K	K	K	K	K	K	K	K	K	K	K	K	W	W	W	W	K	K	K	K	K	K	K	K	K	K	K	K	K	K	K	K	K	K	K	K	K	K
SCRI_RS_238649	3H	44.83	-	-	K	K	W	K	K	K	K	K	K	K	K	K	K	K	K	K	K	K	K	W	W	W	W	K	K	K	K	K	K	K	K	K	K	K	K	K	K	K	K	K	K	K	K	K	K
SCRI_RS_9584	3H	44.83	-	-	K	K	W	K	K	K	K	K	K	K	K	K	K	K	K	K	K	K	K	W	W	W	W	K	K	K	K	K	K	K	K	K	K	K	K	K	K	K	K	K	K	K	K	K	K
SCRI_RS_227793	3H	45.3966	3H	54.52	K	K	W	K	K	K	K	K	K	K	K	K	K	K	K	K	K	K	K	W	W	W	W	K	K	K	K	K	K	K	K	K	K	K	K	K	K	K	K	K	K	K	K	K	K
BOPA1_4105-1417	3H	45.8215	3H	54.92	K	K	W	K	K	K	K	K	K	K	K	K	K	K	K	K	K	K	K	W	W	W	W	K	K	K	K	K	K	K	K	K	K	K	K	K	K	K	K	K	K	K	K	K	K
BOPA1_7045-950	3H	46.034	3H	55.57	K	K	W	K	K	K	K	K	K	K	K	K	K	K	K	K	K	K	K	W	W	W	W	K	K	K	K	K	K	K	K	K	K	K	K	K	K	K	K	K	K	K	K	K	K
BOPA2_12_30737	3H	46.034	3H	55.57	K	K	W	K	K	K	K	K	K	K	K	K	K	K	K	K	K	K	K	W	W	W	W	K	K	K	K	K	K	K	K	K	K	K	K	K	K	K	K	K	K	K	K	K	K
BK_08	3H	46.1756	-	-	K	K	W	K	K	K	K	K	K	K	K	K	K	K	K	K	K	K	K	W	W	W	W	K	K	K	K	K	K	K	K	K	K	K	K	K	K	K	K	K	K	K	K	K	K
SCRI_RS_13433	3H	46.1756	3H	55.57	K	K	W	K	K	K	K	K	K	K	K	K	K	K	K	K	K	K	K	W	W	W	W	K	K	K	K	K	K	K	K	K	K	K	K	K	K	K	K	K	K	K	K	K	K
SCRI_RS_182479	3H	46.1756	3H	55.57	K	K	W	K	K	K	K	K	K	K	K	K	K	K	K	K	K	K	K	W	W	W	W	K	K	K	K	K	K	K	K	K	K	K	K	K	K	K	K	K	K	K	K	K	K
SCRI_RS_886	3H	46.1756	3H	55.57	K	K	W	K	K	K	K	K	K	K	K	K	K	K	K	K	K	K	K	W	W	W	W	K	K	K	K	K	K	K	K	K	K	K	K	K	K	K	K	K	K	K	K	K	K
SCRI_RS_110693	3H	46.1756	3H	55.57	K	K	W	K	K	K	K	K	K	K	K	K	K	K	K	K	K	K	K	W	W	W	W	K	K	K	K	K	K	K	K	K	K	K	K	K	K	K	K	K	K	K	K	K	K
BOPA1_6354-1193	3H	46.1756	3H	55.36	K	K	W	K	K	K	K	K	K	K	K	K	K	K	K	K	K	K	K	W	W	W	W	K	K	K	K	K	K	K	K	K	K	K	K	K	K	K	K	K	K	K	K	K	K
SCRI_RS_153735	3H	46.1756	-	-	K	K	W	K	K	K	K	K	K	K	K	K	K	K	K	K	K	K	K	W	W	W	W	K	K	K	K	K	K	K	K	K	K	K	K	K	K	K	K	K	K	K	K	K	K
SCRI_RS_239787	3H	46.1756	-	-	K	K	W	K	K	K	K	K	K	K	K	K	K	K	K	K	K	K	K	W	W	W	W	K	K	K	K	K	K	K	K	K	K	K	K	K	K	K	K	K	K	K	K	K	K
SCRI_RS_126627	3H	46.1756	-	-	K	K	W	K	K	K	K	K	K	K	K	K	K	K	K	K	K	K	K	W	W	W	W	K	K	K	K	K	K	K	K	K	K	K	K	K	K	K	K	K	K	K	K	K	K
SCRI_RS_205711	3H	46.3173	3H	55.67	K	K	W	K	K	K	K	K	K	K	K	K	K	K	K	K	K	K	K	W	W	W	W	K	K	K	K	K	K	K	K	K	K	K	K	K	K	K	K	K	K	K	K	K	K
BOPA1_2838-663	3H	49.2918	3H	57.36	K	K	W	K	K	K	K	K	K	K	K	K	K	K	K	K	K	K	K	W	H	W	H	K	K	K	K	K	K	K	K	K	K	K	K	K	K	K	K	K	K	K	K	K	K
SCRI_RS_204057	3H	49.2918	3H	58.01	K	K	W	K	K	K	K	K	K	K	K	K	K	K	K	K	K	K	K	W	H	W	M	K	K	K	K	K	K	K	K	K	K	K	K	K	K	K	K	K	K	K	K	K	K
BOPA1_6491-295	3H	49.6459	3H	58.31	K	K	W	K	K	K	K	K	K	K	K	K	K	K	K	K	K	K	K	W	H	W	H	K	K	K	K	K	K	K	K	K	K	K	K	K	K	K	K	K	K	K	K	K	K
BOPA1_5058-404	3H	50.4958	3H	58.31	K	K	W	K	K	K	K	K	K	K	K	K	K	K	K	K	K	K	K	W	H	W	K	K	K	K	K	K	K	K	K	K	K	K	K	K	K	K	K	K	K	K	K	K	K
BOPA1_ABC10667-1-1-288	3H	50.9207	3H	58.31	K	K	W	K	K	K	K	K	K	K	K	K	K	K	K	K	K	K	K	W	W	W	K	K	K	K	K	K	K	K	K	K	K	K	K	K	K	K	K	K	K	K	K	K	K
BOPA2_12_30618	3H	51.204	3H	58.31	K	K	W	K	K	K	K	K	K	K	K	K	K	K	K	K	K	K	K	W	W	W	K	K	K	K	K	K	K	K	K	K	K	K	K	K	K	K	K	K	K	K	K	K	K
SCRI_RS_142442	3H	51.204	3H	58.31	K	K	W	K	K	K	K	K	K	K	K	K	K	K	K	K	K	K	K	W	W	W	K	K	K	K	K	K	K	K	K	K	K	K	K	K	K	K	K	K	K	K	K	K	K
SCRI_RS_186341	3H	51.204	3H	58.31	K	K	W	K	K	K	K	K	K	K	K	K	K	K	K	K	K	K	K	W	W	W	K	K	K	K	K	K	K	K	K	K	K	K	K	K	K	K	K	K	K	K	K	K	K
SCRI_RS_11126	3H	51.204	3H	58.31	K	K	W	K	K	K	K	K	K	K	K	K	K	K	K	K	K	K	K	W	W	W	K	K	K	K	K	K	K	K	K	K	K	K	K	K	K	K	K	K	K	K	K	K	K
SCRI_RS_169606	3H	51.204	3H	58.31	K	K	W	K	K	K	K	K	K	K	K	K	K	K	K	K	K	K	K	W	W	W	K	K	K	K	K	K	K	K	K	K	K	K	K	K	K	K	K	K	K	K	K	K	K
BOPA1_10353-119	3H	51.204	3H	58.31	K	K	W	K	K	M	K	K	K	K	K	M	M	K	K	M	M	K	K	W	W	W	M	K	K	K	K	M	K	K	K	M	K	K	K	K	K	K	K	K	K	K	M	M	K
BOPA2_12_30130	3H	51.204	3H	58.31	K	K	W	K	K	K	K	K	K	K	K	K	K	K	K	K	K	K	K	W	W	W	K	K	K	K	K	K	K	K	K	K	K	K	K	K	K	K	K	K	K	K	K	K	K
BOPA2_12_30622	3H	51.204	-	-	K	K	W	K	K	K	K	K	K	K	K	K	K	K	K	K	K	K	K	W	W	W	K	K	K	K	K	K	K	K	K	K	K	K	K	K	K	K	K	K	K	K	K	K	K
BOPA2_12_31017	3H	51.204	3H	58.31	K	K	W	K	K	K	K	K	K	K	K	K	K	K	K	K	K	K	K	W	W	W	K	K	K	K	K	K	K	K	K	K	K	K	K	K	K	K	K	K	K	K	K	K	K
SCRI_RS_190876	3H	51.204	-	-	K	K	W	K	K	K	K	K	K	K	K	K	K	K	K	K	K	K	K	W	W	W	K	K	K	K	K	K	K	K	K	K	K	K	K	K	K	K	K	K	K	K	K	K	K
SCRI_RS_215085	3H	51.3456	3H	58.31	K	K	W	K	K	K	K	K	K	K	K	K	K	K	K	K	K	K	K	W	W	W	K	K	K	K	K	K	K	K	K	K	K	K	K	K	K	K	K	K	K	K	K	K	K
SCRI_RS_65878	3H	51.3456	3H	58.31	K	K	W	K	K	K	K	K	K	K	K	K	K	K	K	K	K	K	K	W	W	W	K	K	K	K	K	K	K	K	K	K	K	K	K	K	K	K	K	K	K	K	K	K	K
SCRI_RS_165264	3H	51.3456	3H	58.31	K	K	W	K	K	K	K	K	K	K	K	K	K	K	K	K	K	K	K	W	W	W	K	K	K	K	K	K	K	K	K	K	K	K	K	K	K	K	K	K	K	K	K	K	K
SCRI_RS_178900	3H	51.3456	3H	58.31	K	K	W	K	K	K	K	K	K	K	K	K	K	K	K	K	K	K	K	W	W	W	K	K	K	K	K	K	K	K	K	K	K	K	K	K	K	K	K	K	K	K	K	K	K
BOPA1_10248-954	3H	51.3456	3H	58.31	K	K	W	K	K	K	K	K	K	K	K	K	K	K	K	K	K	K	K	W	W	W	K	K	K	K	K	K	K	K	K	K	K	K	K	K	K	K	K	K	K	K	K	K	K
BOPA1_2861-1941	3H	51.3456	3H	58.31	K	K	W	K	K	K	K	K	K	K	K	K	K	K	K	K	K	K	K	W	W	W	K	K	K	K	K	K	K	K	K	K	K	K	K	K	K	K	K	K	K	K	K	K	K
BOPA1_2897-208	3H	51.3456	3H	58.31	K	K	W	K	K	K	K	K	K	K	K	K	K	K	K	K	K	K	K	W	W	W	K	K	K	K	K	K	K	K	K	K	K	K	K	K	K	K	K	K	K	K	K	K	K
BOPA1_4707-421	3H	51.3456	3H	58.31	K	K	W	K	K	K	K	K	K	K	K	K	K	K	K	K	K	K	K	W	W	W	K	K	K	K	K	K	K	K	K	K	K	K	K	K	K	K	K	K	K	K	K	K	K
BOPA1_6171-956	3H	51.3456	3H	58.31	K	K	W	K	K	K	K	K	K	K	K	K	K	K	K	K	K	K	K	W	W	W	K	K	K	K	K	K	K	K	K	K	K	K	K	K	K	K	K	K	K	K	K	K	K
BOPA1_6818-411	3H	51.3456	3H	58.31	K	K	M	K	K	K	K	K	K	K	K	K	K	K	K	K	K	K	K	M	M	M	K	K	K	K	K	K	K	K	K	K	K	K	K	K	K	K	K	K	K	K	K	K	K
BOPA1_ABC05852-1-2-658	3H	51.3456	3H	58.31	K	K	W	K	K	K	K	K	K	K	K	K	K	K	K	K	K	K	K	W	W	W	K	K	K	K	K	K	K	K	K	K	K	K	K	K	K	K	K	K	K	K	K	K	K
BOPA1_ABC14167-1-2-250	3H	51.3456	3H	58.31	K	K	W	K	K	K	K	K	K	K	K	K	K	K	K	K	K	K	K	W	W	W	K	K	K	K	K	K	K	K	K	K	K	K	K	K	K	K	K	K	K	K	K	K	K
BOPA2_12_30039	3H	51.3456	3H	58.31	K	K	W	K	K	K	K	K	K	K	K	K	K	K	K	K	K	K	K	W	W	W	K	K	K	K	K	K	K	K	K	K	K	K	K	K	K	K	K	K	K	K	K	K	K
BOPA2_12_31502	3H	51.3456	3H	58.31	K	K	W	K	K	K	K	K	K	K	K	K	K	K	K	K	K	K	K	W	W	W	K	K	K	K	K	K	K	K	K	K	K	K	K	K	K	K	K	K	K	K	K	K	K
SCRI_RS_128491	3H	51.3456	-	-	K	K	W	K	K	K	K	K	K	K	K	K	K	K	K	K	K	K	K	W	W	W	K	K	K	K	K	K	K	K	K	K	K	K	K	K	K	K	K	K	K	K	K	K	K
SCRI_RS_129291	3H	51.3456	-	-	K	K	W	K	K	K	K	K	K	K	K	K	K	K	K	K	K	K	K	W	W	W	K	K	K	K	K	K	K	K	K	K	K	K	K	K	K	K	K	K	K	K	K	K	K
SCRI_RS_152198	3H	51.3456	-	-	K	K	W	K	K	K	K	K	K	K	K	K	K	K	K	K	K	K	K	W	W	W	K	K	K	K	K	K	K	K	K	K	K	K	K	K	K	K	K	K	K	K	K	K	K
SCRI_RS_153723	3H	51.3456	-	-	K	K	W	K	K	K	K	K	K	K	K	K	K	K	K	K	K	K	K	W	W	W	K	K	K	K	K	K	K	K	K	K	K	K	K	K	K	K	K	K	K	K	K	K	K
SCRI_RS_158967	3H	51.3456	-	-	K	K	W	K	K	K	K	K	K	K	K	K	K	K	K	K	K	K	K	W	W	W	K	K	K	K	K	K	K	K	K	K	K	K	K	K	K	K	K	K	K	K	K	K	K
SCRI_RS_174254	3H	51.3456	-	-	K	K	W	K	K	K	K	K	K	K	K	K	K	K	K	K	K	K	K	W	W	W	K	K	K	K	K	K	K	K	K	K	K	K	K	K	K	K	K	K	K	K	K	K	K
SCRI_RS_176264	3H	51.3456	-	-	K	K	W	K	K	K	K	K	K	K	K	K	K	K	K	K	K	K	K	W	W	W	K	K	K	K	K	K	K	K	K	K	K	K	K	K	K	K	K	K	K	K	K	K	K
SCRI_RS_181347	3H	51.3456	-	-	K	K	W	K	K	K	K	K	K	K	K	K	K	K	K	K	K	K	K	W	W	W	K	K	K	K	K	K	K	K	K	K	K	K	K	K	K	K	K	K	K	K	K	K	K
SCRI_RS_182609	3H	51.3456	-	-	K	K	W	K	K	K	K	K	K	K	K	K	K	K	K	K	K	K	K	W	W	W	K	K	K	K	K	K	K	K	K	K	K	K	K	K	K	K	K	K	K	K	K	K	K
SCRI_RS_204628	3H	51.3456	-	-	K	K	W	K	K	K	K	K	K	K	K	K	K	K	K	K	K	K	K	W	W	W	K	K	K	K	K	K	K	K	K	K	K	K	K	K	K	K	K	K	K	K	K	K	K
SCRI_RS_224702	3H	51.3456	-	-	K	K	W	K	K	K	K	K	K	K	K	K	K	K	K	K	K	K	K	W	W	W	K	K	K	K	K	K	K	K	K	K	K	K	K	K	K	K	K	K	K	K	K	K	K
SCRI_RS_120315	3H	51.3456	-	-	K	K	W	K	K	K	K	K	K	K	K	K	K	K	K	K	K	K	K	W	W	W	K	K	K	K	K	K	K	K	K	K	K	K	K	K	K	K	K	K	K	K	K	K	K
SCRI_RS_149481	3H	51.3456	-	-	K	K	W	K	K	K	K	K	K	K	K	K	K	K	K	K	K	K	K	W	W	W	K	K	K	K	K	K	K	K	K	K	K	K	K	K	K	K	K	K	K	K	K	K	K
SCRI_RS_9327	3H	51.3456	-	-	K	K	W	K	K	K	K	K	K	K	K	K	K	K	K	K	K	K	K	W	W	W	K	K	K	K	K	K	K	K	K	K	K	K	K	K	K	K	K	K	K	K	K	K	K
SCRI_RS_170765	3H	51.3456	-	-	K	K	W	K	K	K	K	K	K	K	K	K	K	K	K	K	K	K	K	W	W	W	K	K	K	K	K	K	K	K	K	K	K	K	K	K	K	K	K	K	K	K	K	K	K
SCRI_RS_111312	3H	51.3456	-	-	K	K	W	K	K	K	K	K	K	K	K	K	K	K	K	K	K	K	K	M	W	W	K	K	K	K	K	K	K	K	K	K	K	K	K	K	K	K	K	K	K	K	K	K	K
SCRI_RS_150800	3H	51.3456	-	-	K	K	W	K	K	K	K	K	K	K	K	K	K	K	K	K	K	K	K	W	W	W	K	K	K	K	K	K	K	K	K	K	K	K	K	K	K	K	K	K	K	K	K	K	K
SCRI_RS_188912	3H	51.3456	-	-	K	K	W	K	K	K	K	K	K	K	K	K	K	K	K	K	K	K	K	W	W	W	K	K	K	K	K	K	K	K	K	K	K	K	K	K	K	K	K	K	K	K	K	K	K
SCRI_RS_84470	3H	51.3456	-	-	K	K	W	K	K	K	K	K	K	K	K	K	K	K	K	K	K	K	K	W	W	W	K	K	K	K	K	K	K	K	K	K	K	K	K	K	K	K	K	K	K	K	K	K	K
SCRI_RS_107178	3H	51.3456	-	-	K	K	W	K	K	K	K	K	K	K	K	K	K	K	K	K	K	K	K	W	W	W	K	K	K	K	K	K	K	K	K	K	K	K	K	K	K	K	K	K	K	K	K	K	K
SCRI_RS_150370	3H	51.3456	-	-	K	K	W	K	K	K	K	K	K	K	K	K	K	K	K	K	K	K	K	W	W	W	K	K	K	K	K	K	K	K	K	K	K	K	K	K	K	K	K	K	K	K	K	K	K
SCRI_RS_187032	3H	51.3456	-	-	K	K	W	K	K	K	K	K	K	K	K	K	K	K	K	K	K	K	K	W	W	W	K	K	K	K	K	K	K	K	K	K	K	K	K	K	K	K	K	K	K	K	K	K	K
SCRI_RS_151545	3H	51.3456	-	-	K	K	W	K	K	K	K	K	K	K	K	K	K	K	K	K	K	K	K	W	W	W	K	K	K	K	K	K	K	K	K	K	K	K	K	K	K	K	K	K	K	K	K	K	K
SCRI_RS_194233	3H	51.3456	-	-	K	K	W	K	K	K	K	K	K	K	K	K	K	K	K	K	K	K	K	W	W	W	K	K	K	K	K	K	K	K	K	K	K	K	K	K	K	K	K	K	K	K	K	K	K
SCRI_RS_214796	3H	51.3456	-	-	K	K	W	K	K	K	K	K	K	K	K	K	K	K	K	K	K	K	K	W	W	W	K	K	K	K	K	K	K	K	K	K	K	K	K	K	K	K	K	K	K	K	K	K	K
SCRI_RS_214259	3H	51.3456	-	-	K	K	W	K	K	K	K	K	K	K	K	K	K	K	K	K	K	K	K	W	W	W	K	K	K	K	K	K	K	K	K	K	K	K	K	K	K	K	K	K	K	K	K	K	K
SCRI_RS_171453	3H	51.3456	-	-	K	K	W	K	K	K	K	K	K	K	K	K	K	K	K	K	K	K	K	W	W	W	K	K	K	K	K	K	K	K	K	K	K	K	K	K	K	K	K	K	K	K	K	K	K
SCRI_RS_229167	3H	51.3456	-	-	K	K	W	K	K	K	K	K	K	K	K	K	K	K	K	K	K	K	K	W	W	W	K	K	K	K	K	K	K	K	K	K	K	K	K	K	K	K	K	K	K	K	K	K	K
SCRI_RS_17525	3H	51.3456	-	-	K	K	W	K	K	K	K	K	K	K	K	K	K	K	K	K	K	K	K	W	W	W	K	K	K	K	K	K	K	K	K	K	K	K	K	K	K	K	K	K	K	K	K	K	K
SCRI_RS_220070	3H	51.3456	-	-	K	K	W	K	K	K	K	K	K	K	K	K	K	K	K	K	K	K	K	W	W	W	K	K	K	K	K	K	K	K	K	K	K	K	K	K	K	K	K	K	K	K	K	K	K
SCRI_RS_156525	3H	51.3456	-	-	K	K	W	K	K	K	K	K	K	K	K	K	K	K	K	K	K	K	K	W	W	W	K	K	K	K	K	K	K	K	K	K	K	K	K	K	K	K	K	K	K	K	K	K	K
SCRI_RS_167084	3H	51.3456	-	-	K	K	W	K	K	K	K	K	K	K	K	K	K	K	K	K	K	K	K	W	W	W	K	K	K	K	K	K	K	K	K	K	K	K	K	K	K	K	K	K	K	K	K	K	K
SCRI_RS_191131	3H	51.3456	-	-	K	K	W	K	K	K	K	K	K	K	K	K	K	K	K	K	K	K	K	W	W	W	K	K	K	K	K	K	K	K	K	K	K	K	K	K	K	K	K	K	K	K	K	K	K
SCRI_RS_121826	3H	51.3456	-	-	K	K	W	K	K	K	K	K	K	K	K	K	K	K	K	K	K	K	K	W	W	W	K	K	K	K	K	K	K	K	K	K	K	K	K	K	K	K	K	K	K	K	K	K	K
SCRI_RS_137787	3H	51.3456	-	-	K	K	W	K	K	K	K	K	K	K	K	K	K	K	K	K	K	K	K	W	W	W	K	K	K	K	K	K	K	K	K	K	K	K	K	K	K	K	K	K	K	K	K	K	K
SCRI_RS_157048	3H	51.3456	-	-	K	K	W	K	K	K	K	K	K	K	K	K	K	K	K	K	K	K	K	W	W	W	K	K	K	K	K	K	K	K	K	K	K	K	K	K	K	K	K	K	K	K	K	K	K
BOPA1_3143-1276	3H	51.6289	3H	58.31	K	K	W	K	K	K	K	K	K	K	K	K	K	K	K	K	K	K	K	W	W	W	K	K	K	K	K	K	K	K	K	K	K	K	K	K	K	K	K	K	K	K	K	K	K
BOPA1_3567-112	3H	51.6289	3H	58.31	K	K	W	K	K	K	K	K	K	K	K	K	K	K	K	K	K	K	K	W	W	W	K	K	K	K	K	K	K	K	K	K	K	K	K	K	K	K	K	K	K	K	K	K	K
BOPA1_4728-1735	3H	51.6289	3H	58.31	K	K	W	K	K	K	K	K	K	K	K	K	K	K	K	K	K	K	K	W	W	W	K	K	K	K	K	K	K	K	K	K	K	K	K	K	K	K	K	K	K	K	K	K	K
BOPA1_7716-721	3H	51.6289	3H	58.31	K	K	W	K	K	K	K	K	K	K	K	K	K	K	K	K	K	K	K	W	W	W	K	K	K	K	K	K	K	K	K	K	K	K	K	K	K	K	K	K	K	K	K	K	K
BOPA1_9658-234	3H	51.6289	3H	58.31	K	K	W	K	K	K	K	K	K	K	K	K	K	K	K	K	K	K	K	W	W	W	K	K	K	K	K	K	K	K	K	K	K	K	K	K	K	K	K	K	K	K	K	K	K
BOPA1_ABC04375-1-1-173	3H	51.6289	3H	58.31	K	K	W	K	K	K	K	K	K	K	K	K	K	K	K	K	K	K	K	W	W	W	K	K	K	K	K	K	K	K	K	K	K	K	K	K	K	K	K	K	K	K	K	K	K
BOPA1_ABC05866-1-1-311	3H	51.6289	3H	58.31	K	K	W	K	K	K	K	K	K	K	K	K	K	K	K	K	K	K	K	W	W	W	K	K	K	K	K	K	K	K	K	K	K	K	K	K	K	K	K	K	K	K	K	K	K
BOPA1_ABC11783-1-1-99	3H	51.6289	3H	58.31	K	K	W	K	K	K	K	K	K	K	K	K	K	K	K	K	K	K	K	W	W	W	K	K	K	K	K	K	K	K	K	K	K	K	K	K	K	K	K	K	K	K	K	K	K
SCRI_RS_213411	3H	51.6289	3H	58.31	K	K	W	K	K	K	K	K	K	K	K	K	K	K	K	K	K	K	K	W	W	W	K	K	K	K	K	K	K	K	K	K	K	K	K	K	K	K	K	K	K	K	K	K	K
SCRI_RS_225537	3H	51.6289	3H	58.31	K	K	W	K	K	K	K	K	K	K	K	K	K	K	K	K	K	K	K	W	W	W	K	K	K	K	K	K	K	K	K	K	K	K	K	K	K	K	K	K	K	K	K	K	K
SCRI_RS_239964	3H	51.6289	3H	58.31	K	K	W	K	K	K	K	K	K	K	K	K	K	K	K	K	K	K	K	W	W	W	K	K	K	K	K	K	K	K	K	K	K	K	K	K	K	K	K	K	K	K	K	K	K
SCRI_RS_189167	3H	51.6289	3H	58.31	K	K	W	K	K	K	K	K	K	K	K	K	K	K	K	K	K	K	K	W	W	W	K	K	K	K	K	K	K	K	K	K	K	K	K	K	K	K	K	K	K	K	K	K	K
SCRI_RS_173348	3H	51.6289	3H	58.31	K	K	W	K	K	K	K	K	K	K	K	K	K	K	K	K	K	K	K	W	W	W	K	K	K	K	K	K	K	K	K	K	K	K	K	K	K	K	K	K	K	K	K	K	K
SCRI_RS_181847	3H	51.6289	3H	58.31	K	K	W	K	K	K	K	K	K	K	K	K	K	K	K	K	K	K	K	W	W	W	K	K	K	K	K	K	K	K	K	K	K	K	K	K	K	K	K	K	K	K	K	K	K
SCRI_RS_138918	3H	51.6289	-	-	K	K	W	K	K	K	K	K	K	K	K	K	K	K	K	K	K	K	K	W	W	W	K	K	K	K	K	K	K	K	K	K	K	K	K	K	K	K	K	K	K	K	K	K	K
BOPA1_2066-1133	3H	51.7705	3H	58.31	K	K	W	K	K	K	K	K	K	K	K	K	K	K	K	K	K	K	K	W	W	W	K	K	K	K	K	K	K	K	K	K	K	K	K	K	K	K	K	K	K	K	K	K	K
SCRI_RS_238114	3H	51.7705	3H	58.51	K	K	M	K	K	K	K	K	K	K	K	K	K	K	K	K	K	K	K	M	M	M	K	K	K	K	K	K	K	K	K	K	K	K	K	K	K	K	K	K	K	K	K	K	K
SCRI_RS_8664	3H	51.7705	3H	58.51	K	K	W	K	K	K	K	K	K	K	K	K	K	K	K	K	K	K	K	W	W	W	K	K	K	K	K	K	K	K	K	K	K	K	K	K	K	K	K	K	K	K	K	K	K
BOPA1_4453-422	3H	52.6204	3H	59.38	K	K	W	K	K	K	K	K	K	K	K	K	K	K	K	K	K	K	K	W	H	W	K	K	K	K	K	K	K	K	K	K	K	K	K	K	K	K	K	K	K	K	K	K	K
BOPA1_10126-999	3H	53.2578	3H	59.86	K	K	W	K	K	K	K	K	K	K	K	K	K	K	K	K	K	K	K	W	H	W	K	K	K	K	K	K	K	K	K	K	K	K	K	K	K	K	K	K	K	K	K	K	K
BOPA1_1746-1527	3H	53.2578	3H	61.82	K	K	W	K	K	K	K	K	K	K	K	K	K	K	K	K	K	K	K	W	H	W	K	K	K	K	K	W	K	K	K	K	K	K	K	K	K	K	K	K	K	K	K	K	K
BOPA1_2804-1832	3H	53.2578	3H	61.94	K	K	W	K	K	K	K	K	K	K	K	K	K	K	K	K	K	K	K	W	H	W	K	K	K	K	K	W	K	K	K	K	K	K	K	K	K	K	K	K	K	K	K	K	K
SCRI_RS_186102	3H	54.5326	3H	61.29	K	K	W	K	K	K	K	K	K	K	K	K	K	K	K	K	K	K	K	W	H	W	K	K	K	K	K	W	K	K	K	K	K	K	K	K	K	K	K	K	K	K	K	K	K
SCRI_RS_222102	3H	54.8159	3H	61.59	K	K	W	K	K	K	K	K	K	K	K	K	K	K	K	K	K	K	K	W	H	W	K	K	K	K	K	W	K	K	K	K	K	K	K	K	K	K	K	K	K	K	K	K	K
SCRI_RS_173186	3H	55.0992	3H	61.89	K	K	W	K	K	K	K	K	K	K	K	K	K	K	K	K	K	K	K	W	H	W	K	K	K	K	K	K	K	K	K	K	K	K	K	K	K	K	K	K	K	K	K	K	K
BOPA1_2338-1572	3H	55.17	3H	62.97	K	K	W	K	K	K	K	K	K	K	K	K	K	K	K	K	K	K	K	W	H	W	K	K	K	K	K	K	K	K	K	K	K	K	K	K	K	K	K	K	K	K	K	K	K
SCRI_RS_174324	3H	55.17	-	-	K	K	W	K	K	K	K	K	K	K	K	K	K	K	K	K	K	K	K	W	H	K	K	K	K	K	K	K	K	K	K	K	K	K	K	K	K	K	K	K	K	K	K	K	K
BOPA1_4184-393	3H	57.0822	3H	64.07	K	K	W	K	K	K	K	K	K	K	K	K	K	K	K	K	K	K	K	W	H	K	K	K	K	K	K	K	K	K	K	K	K	K	K	K	K	K	K	K	K	K	K	K	K
SCRI_RS_152371	3H	57.2238	3H	64.17	K	K	W	K	K	K	K	K	K	K	K	K	K	K	K	K	K	K	K	W	H	K	K	K	K	K	K	K	K	K	K	K	K	K	K	K	K	K	K	K	K	K	K	K	K
SCRI_RS_143331	3H	57.3654	3H	64.37	K	K	W	K	K	K	K	K	K	K	K	K	K	K	K	K	K	K	K	W	H	K	K	K	K	K	K	K	K	K	K	K	K	K	K	K	K	K	K	K	K	K	K	K	K
SCRI_RS_1799	3H	57.3654	3H	64.37	K	K	W	K	K	K	K	K	K	K	K	K	K	K	K	K	K	K	K	W	H	K	K	K	K	K	K	K	K	K	K	K	K	K	K	K	K	K	K	K	K	K	K	K	K
SCRI_RS_135581	3H	57.6487	3H	64.57	K	K	W	K	K	K	K	K	K	K	K	K	K	K	K	K	K	K	K	W	H	K	K	K	K	K	K	K	K	K	K	K	K	K	K	K	K	K	K	K	K	K	K	K	K
SCRI_RS_137934	3H	58.9943	3H	65.16	K	K	W	K	K	K	K	K	K	K	K	K	K	K	K	K	K	K	K	W	W	K	W	H	W	K	K	K	K	K	K	K	K	K	K	K	K	K	K	K	K	K	K	K	K
SCRI_RS_107261	3H	59.136	3H	65.16	K	K	W	K	K	K	K	K	K	K	K	K	K	K	K	K	K	K	K	W	W	K	W	H	W	K	K	K	K	K	K	K	K	K	K	K	K	K	K	K	K	K	K	K	K
SCRI_RS_130616	3H	59.136	3H	65.16	K	K	W	K	K	K	K	K	K	K	K	K	K	K	K	K	K	K	K	W	W	K	W	H	W	K	K	K	K	K	K	K	K	K	K	K	K	K	K	K	K	K	K	K	K
BOPA2_12_30594	3H	59.136	-	-	K	K	W	K	K	K	K	K	K	K	K	K	K	K	K	K	K	K	K	W	W	K	W	H	W	K	K	K	K	K	K	K	K	K	K	K	K	K	K	K	K	K	K	K	K
SCRI_RS_211224	3H	59.2776	3H	65.36	K	K	W	K	K	K	K	K	K	K	K	K	K	K	K	K	K	K	K	W	W	K	W	M	W	K	K	K	K	K	K	K	K	K	K	K	K	K	K	K	K	K	K	K	K
BOPA1_5385-722	3H	59.4193	3H	65.44	K	K	W	K	K	K	K	K	K	K	K	K	K	K	K	K	K	K	K	W	W	K	W	H	W	K	K	K	K	K	K	K	K	K	K	K	K	K	K	K	K	K	K	K	K
SCRI_RS_157150	3H	59.4193	3H	65.44	K	K	W	K	K	K	K	K	K	K	K	K	K	K	K	K	K	K	K	W	W	K	W	H	W	K	K	K	K	K	K	K	K	K	K	K	K	K	K	K	K	K	K	K	K
SCRI_RS_171837	3H	59.4193	3H	65.44	K	K	W	K	K	K	K	K	K	K	K	K	K	K	K	K	K	K	K	W	W	K	W	H	W	K	K	K	K	K	K	K	K	K	K	K	K	K	K	K	K	K	K	K	K
BOPA2_12_30616	3H	59.6317	3H	65.44	K	K	W	K	K	K	K	K	K	K	K	K	K	K	K	K	K	K	K	W	W	K	W	H	W	K	K	K	K	K	K	K	K	K	K	K	K	K	K	K	K	K	K	K	K
BOPA2_12_30788	3H	59.6317	3H	65.44	K	K	W	K	K	K	K	K	K	K	K	K	K	K	K	K	K	K	K	W	W	K	W	H	W	K	K	K	K	K	K	K	K	K	K	K	K	K	K	K	K	K	M	K	K
SCRI_RS_178907	3H	59.6317	3H	65.44	K	K	W	K	K	K	K	K	K	K	K	K	K	K	K	K	K	K	K	W	W	K	W	H	W	K	K	K	K	K	K	K	K	K	K	K	K	K	K	K	K	K	K	K	K
SCRI_RS_231031	3H	59.6317	3H	65.44	K	K	W	K	K	K	K	K	K	K	K	K	K	K	K	K	K	K	K	W	W	K	W	H	W	K	K	K	K	K	K	K	K	K	K	K	K	K	K	K	K	K	K	K	K
SCRI_RS_220115	3H	59.6317	-	-	K	K	W	K	K	K	K	K	K	K	K	K	K	K	K	K	K	K	K	W	W	K	W	M	W	K	K	K	K	K	K	K	K	K	K	K	K	K	K	K	K	K	K	K	K
SCRI_RS_220129	3H	59.6317	-	-	K	K	W	K	K	K	K	K	K	K	K	K	K	K	K	K	K	K	K	W	W	K	W	H	W	K	K	K	K	K	K	K	K	K	K	K	K	K	K	K	K	K	K	K	K
SCRI_RS_224335	3H	59.6317	-	-	K	K	W	K	K	K	K	K	K	K	K	K	K	K	K	K	K	K	K	W	W	K	W	H	W	K	K	K	K	K	K	K	K	K	K	K	K	K	K	K	K	K	K	K	K
SCRI_RS_69605	3H	59.6317	-	-	K	K	W	K	K	K	K	K	K	K	K	K	K	K	K	K	K	K	K	W	W	K	W	H	W	K	K	K	K	K	K	K	K	K	K	K	K	K	K	K	K	K	K	K	K
SCRI_RS_161744	3H	60.8357	3H	65.74	K	K	W	K	K	K	K	K	K	K	K	K	K	K	K	K	K	K	K	W	W	K	W	H	W	K	K	K	K	K	K	K	K	K	K	K	K	K	K	K	K	K	K	K	K
SCRI_RS_10288	3H	61.7564	3H	66.74	K	K	W	K	K	K	K	K	K	K	K	K	K	K	K	K	K	K	K	W	W	K	W	H	W	K	K	K	K	K	K	K	K	K	K	K	K	K	K	K	K	K	K	K	K
SCRI_RS_4575	3H	61.898	3H	66.74	K	K	W	K	K	K	K	K	K	K	K	K	K	K	K	K	K	K	K	W	W	K	W	M	W	K	K	K	K	K	K	K	K	K	K	K	K	K	K	K	K	K	K	K	K
SCRI_RS_157904	3H	62.3938	3H	66.84	K	K	W	K	K	K	K	K	K	K	K	K	K	K	K	K	K	K	K	W	W	K	W	M	W	K	K	K	K	K	K	K	K	K	K	K	K	K	K	K	K	K	K	K	K
SCRI_RS_138291	3H	62.5354	3H	66.89	K	K	W	K	K	K	K	K	K	K	K	K	K	K	K	K	K	K	K	W	W	K	W	H	W	K	K	K	K	K	K	K	K	K	K	K	K	K	K	K	K	K	K	K	K
BOPA2_12_31356	3H	62.6771	3H	67.09	K	K	W	K	K	K	K	K	K	K	K	K	K	K	K	K	K	K	K	W	W	K	W	M	W	K	K	K	K	K	K	K	K	K	K	K	K	K	K	K	K	K	K	K	K
SCRI_RS_139294	3H	62.6771	3H	67.09	K	K	W	K	K	K	K	K	K	K	K	K	K	K	K	K	K	K	K	W	W	K	W	H	W	K	K	K	K	K	K	K	K	K	K	K	K	K	K	K	K	K	K	K	K
SCRI_RS_237939	3H	62.9603	3H	67.39	K	K	K	K	K	K	K	K	K	K	K	K	K	K	K	K	K	K	K	K	W	K	W	H	W	K	K	K	K	K	K	K	K	K	K	K	K	K	K	K	K	K	K	K	K
SCRI_RS_162931	3H	62.9603	3H	67.39	K	K	K	K	K	K	K	K	K	K	K	K	K	K	K	K	K	K	K	K	W	K	W	H	W	K	K	K	K	K	K	K	K	K	K	K	K	K	K	K	K	K	K	K	K
BOPA1_2315-702	3H	62.9603	3H	67.31	K	K	K	K	K	K	K	K	K	K	K	K	K	K	K	K	K	K	K	K	W	K	W	H	W	K	K	K	K	K	K	K	K	K	K	K	K	K	K	K	K	K	K	K	K
BOPA1_3650-311	3H	62.9603	3H	69.28	K	M	K	K	K	K	K	K	K	K	K	K	K	K	M	K	K	M	K	K	W	K	W	W	W	M	K	K	M	K	M	K	K	K	M	K	M	M	K	K	K	K	K	M	K
BOPA1_5960-1302	3H	62.9603	3H	66.15	K	K	W	K	K	K	K	K	K	K	K	K	K	K	K	K	K	K	K	W	W	K	W	H	W	K	K	K	K	K	K	K	K	K	K	K	K	K	K	K	K	K	K	K	K
SCRI_RS_175710	3H	62.9603	-	-	K	K	K	K	K	K	K	K	K	K	K	K	K	K	K	K	K	K	K	K	W	K	W	H	W	K	K	K	K	K	K	K	K	K	K	K	K	K	K	K	K	K	K	K	K
SCRI_RS_234006	3H	62.9603	-	-	K	K	W	K	K	K	K	K	K	K	K	K	K	K	K	K	K	K	K	W	W	K	W	H	W	K	K	K	K	K	K	K	K	K	K	K	K	K	K	K	K	K	K	K	K
BOPA1_2447-546	3H	63.7394	3H	69.28	K	K	K	K	K	K	K	K	K	K	K	K	K	K	K	K	K	K	K	K	W	K	W	W	W	K	K	K	K	K	K	K	K	K	K	K	K	K	K	K	K	K	K	K	K
BOPA1_ABC13107-1-3-299	3H	63.7394	3H	66.15	K	K	W	K	K	K	K	K	K	K	K	K	K	K	K	K	K	K	K	W	W	K	W	M	W	K	K	K	K	K	K	K	K	K	K	K	K	K	K	K	K	K	K	K	K
SCRI_RS_137201	3H	63.7394	-	-	K	K	W	K	K	K	K	K	K	K	K	K	K	K	K	K	K	K	K	W	W	K	W	H	W	K	K	K	K	K	K	K	K	K	K	K	K	K	K	K	K	K	K	K	K
BOPA1_4618-1559	3H	63.881	3H	68.29	K	K	K	K	K	K	K	K	K	K	K	K	K	K	K	K	K	K	K	K	W	K	W	H	W	K	K	K	K	K	K	K	K	K	K	K	K	K	K	K	K	K	K	K	K
BOPA2_12_30743	3H	63.881	3H	68.29	K	K	K	K	K	K	K	K	K	K	K	K	K	K	K	K	K	K	K	K	W	K	W	H	W	K	K	K	K	K	K	K	K	K	K	K	K	K	K	K	K	K	K	K	K
SCRI_RS_194602	3H	63.881	3H	68.09	K	K	K	K	K	K	K	K	K	K	K	K	K	K	K	K	K	K	K	K	W	K	W	H	W	K	K	K	K	K	K	K	K	K	K	K	K	K	K	K	K	K	K	K	K
BOPA2_12_31529	3H	63.881	3H	67.31	K	K	W	K	K	K	K	K	K	K	K	K	K	K	K	K	K	K	K	W	W	K	W	H	W	K	K	K	K	K	K	K	K	K	K	K	K	K	K	K	K	K	K	K	K
SCRI_RS_76971	3H	63.881	-	-	K	K	W	K	K	K	K	K	K	K	K	K	K	K	K	K	K	K	K	W	W	K	W	H	W	K	K	K	K	K	K	K	K	K	K	K	K	K	K	K	K	K	K	K	K
SCRI_RS_201987	3H	63.881	-	-	K	K	W	K	K	K	K	K	K	K	K	K	K	K	K	K	K	K	K	W	W	K	W	H	W	K	K	K	K	K	K	K	K	K	K	K	K	K	K	K	K	K	K	K	K
SCRI_RS_226190	3H	64.1643	-	-	K	K	W	K	K	K	K	K	K	K	K	K	K	K	K	K	K	K	K	W	W	K	W	H	W	K	K	K	K	K	K	K	K	K	K	K	K	K	K	K	K	K	K	K	K
SCRI_RS_104564	3H	64.3059	3H	68.39	K	K	K	K	K	K	K	K	K	K	K	K	K	K	K	K	K	K	K	K	W	K	W	H	W	K	K	K	K	K	K	K	K	K	K	K	K	K	K	K	K	K	K	K	K
SCRI_RS_221981	3H	64.3059	3H	68.39	K	K	K	K	K	K	K	K	K	K	K	K	K	K	K	K	K	K	K	K	W	K	W	W	W	K	K	K	K	K	K	K	K	K	K	K	K	K	K	K	K	K	K	K	K
SCRI_RS_152472	3H	64.3059	-	-	K	K	W	K	K	K	K	K	K	K	K	K	K	K	K	K	K	K	K	W	W	K	W	H	W	K	K	K	K	K	K	K	K	K	K	K	K	K	K	K	K	K	K	K	K
SCRI_RS_210118	3H	64.3059	-	-	K	K	W	K	K	K	K	K	K	K	K	K	K	K	K	K	K	K	K	W	W	K	W	H	W	K	K	K	K	K	K	K	K	K	K	K	K	K	K	K	K	K	K	K	K
SCRI_RS_160216	3H	64.8725	3H	68.84	K	K	K	K	K	K	K	K	K	K	K	K	K	K	K	K	K	K	K	K	W	K	W	W	W	K	K	K	K	K	K	K	K	K	K	K	K	K	K	K	K	K	K	K	K
BOPA1_1639-613	3H	64.8725	3H	70.87	K	K	K	K	K	K	K	K	K	K	K	K	K	K	K	K	K	K	K	K	W	K	W	W	W	K	K	K	K	K	K	K	K	K	K	K	K	K	K	K	K	K	K	K	K
BOPA1_ABC11278-1-1-76	3H	64.8725	-	-	K	K	K	K	K	K	K	K	K	K	K	K	K	K	K	K	K	K	K	K	W	K	W	W	W	K	K	K	K	K	K	K	K	K	K	K	K	K	K	K	K	K	K	K	K
SCRI_RS_161186	3H	64.8725	-	-	K	K	K	K	K	K	K	K	K	K	K	K	K	K	K	K	K	K	K	K	W	K	W	W	W	K	K	K	K	K	K	K	K	K	K	K	K	K	K	K	K	K	K	K	K
SCRI_RS_219322	3H	64.8725	-	-	K	K	K	K	K	K	K	K	K	K	K	K	K	K	K	K	K	K	K	K	W	K	W	W	W	K	K	K	K	K	K	K	K	K	K	K	K	K	K	K	K	K	K	K	K
SCRI_RS_235869	3H	64.8725	-	-	K	K	K	K	K	K	K	K	K	K	K	K	K	K	K	K	K	K	K	K	W	K	W	W	W	K	K	K	K	K	K	K	K	K	K	K	K	K	K	K	K	K	K	K	K
SCRI_RS_108543	3H	64.8725	-	-	K	K	K	K	K	K	K	K	K	K	K	K	K	K	K	K	K	K	K	K	W	K	W	W	W	K	K	K	K	K	K	K	K	K	K	K	K	K	K	K	K	K	K	K	K
SCRI_RS_149160	3H	64.8725	-	-	K	K	K	K	K	K	K	K	K	K	K	K	K	K	K	K	K	K	K	K	W	K	W	W	W	K	K	K	K	K	K	K	K	K	K	K	K	K	K	K	K	K	K	K	K
SCRI_RS_122796	3H	64.8725	-	-	K	K	K	K	K	K	K	K	K	K	K	K	K	K	K	K	K	K	K	K	W	K	W	W	W	K	K	K	K	K	K	K	K	K	K	K	K	K	K	K	K	K	K	K	K
SCRI_RS_117006	3H	64.8725	-	-	K	K	K	K	K	K	K	K	K	K	K	K	K	K	K	K	K	K	K	K	W	K	W	W	W	K	K	K	K	K	K	K	K	K	K	K	K	K	K	K	K	K	K	K	K
SCRI_RS_200011	3H	64.8725	-	-	K	K	K	K	K	K	K	K	K	K	K	K	K	K	K	K	K	K	K	K	W	K	W	W	W	K	K	K	K	K	K	K	K	K	K	K	K	K	K	K	K	K	K	K	K
SCRI_RS_189039	3H	67.4929	3H	71.44	K	K	K	K	K	K	K	K	K	K	K	K	K	K	K	K	K	K	K	K	W	K	W	W	W	K	K	K	K	K	K	K	K	K	K	K	K	K	K	K	K	K	K	K	K
SCRI_RS_207408	3H	67.6346	3H	71.54	K	K	K	K	K	K	K	K	K	K	K	K	K	K	K	K	K	K	K	K	W	K	W	W	W	K	K	K	K	K	K	K	K	K	K	K	K	K	K	K	K	K	K	K	K
SCRI_RS_171415	3H	67.9178	3H	71.84	K	K	K	K	K	K	K	K	K	K	K	K	K	K	K	K	K	K	K	K	W	K	W	W	W	K	K	K	K	K	K	K	K	K	K	K	K	K	K	K	K	K	K	K	K
SCRI_RS_208373	3H	67.9178	3H	71.84	K	K	K	K	K	K	K	K	K	K	K	K	K	K	K	K	K	K	K	K	W	K	W	W	W	K	K	K	K	K	K	K	K	K	K	K	K	K	K	K	K	K	K	K	K
BOPA1_6883-203	3H	68.0595	3H	71.84	K	K	K	K	K	K	K	K	K	K	K	K	K	K	K	K	K	K	K	K	W	K	W	W	W	K	K	K	K	K	K	K	K	K	K	K	K	K	K	K	K	K	K	K	K
SCRI_RS_27417	3H	68.0595	3H	72.71	K	K	K	K	K	K	K	K	K	K	K	K	K	K	K	K	K	K	K	K	W	K	W	W	W	K	K	K	K	K	K	K	K	K	K	K	K	K	K	K	K	K	K	K	K
SCRI_RS_27538	3H	68.0595	3H	72.71	K	K	K	K	K	K	K	K	K	K	K	K	K	K	K	K	K	K	K	K	W	K	W	W	W	K	K	K	K	K	K	K	K	K	K	K	K	K	K	K	K	K	K	K	K
BOPA2_12_30677	3H	68.2011	3H	72.91	K	K	K	K	K	K	K	K	K	K	K	K	K	K	K	K	K	K	K	K	W	K	W	W	W	K	K	K	K	K	K	K	K	K	K	K	K	K	K	K	K	K	K	K	K
SCRI_RS_140190	3H	68.2011	3H	72.81	K	K	K	K	K	K	K	K	K	K	K	K	K	K	K	K	K	K	K	K	W	K	W	W	W	K	K	K	K	K	K	K	K	K	K	K	K	K	K	K	K	K	K	K	K
BOPA1_8722-512	3H	68.272	3H	73.21	K	K	K	K	K	K	K	K	K	K	K	K	K	K	K	K	K	K	K	K	W	K	W	W	W	K	K	K	K	K	K	K	K	K	K	K	K	K	K	K	K	K	K	K	K
SCRI_RS_223611	3H	68.272	3H	72.91	K	K	K	K	K	K	K	K	K	K	K	K	K	K	K	K	K	K	K	K	W	K	W	W	W	K	K	K	K	K	K	K	K	K	K	K	K	K	K	K	K	K	K	K	K
SCRI_RS_148020	3H	68.272	3H	72.91	K	K	K	K	K	K	K	K	K	K	K	K	K	K	K	K	K	K	K	K	W	K	W	W	W	K	K	K	K	K	K	K	K	K	K	K	K	K	K	K	K	K	K	K	K
BOPA1_11832-415	3H	68.9802	3H	73.21	K	K	K	K	K	K	K	K	K	K	K	K	K	K	K	K	K	K	K	K	W	K	W	W	W	K	K	K	K	K	K	K	K	K	K	K	K	K	K	K	K	K	K	K	K
SCRI_RS_159249	3H	68.9802	3H	73.21	K	K	K	K	K	K	K	K	K	K	K	K	K	K	K	K	K	K	K	K	W	K	W	W	W	K	K	K	K	K	K	K	K	K	K	K	K	K	K	K	K	K	K	K	K
SCRI_RS_190676	3H	68.9802	3H	73.21	K	K	K	K	K	K	K	K	K	K	K	K	K	K	K	K	K	K	K	K	W	K	W	W	W	K	K	K	K	K	K	K	K	K	K	K	K	K	K	K	K	K	K	K	K
SCRI_RS_223097	3H	69.9008	3H	74.11	K	K	K	K	K	K	K	K	K	K	K	K	K	K	K	K	K	K	K	K	W	K	W	W	W	W	K	K	K	K	K	K	K	K	K	K	K	K	K	K	K	K	K	K	K
SCRI_RS_202772	3H	70.1841	3H	74.41	K	K	K	K	K	K	K	K	K	K	K	K	K	K	K	K	K	K	K	K	W	K	W	W	W	W	K	K	K	K	K	K	K	K	K	K	K	K	K	K	K	K	K	K	K
BOPA1_11116-257	3H	73.017	3H	76.17	K	K	K	K	K	K	K	K	K	K	K	K	K	K	K	K	K	K	K	K	W	K	W	W	W	W	K	K	K	K	K	K	K	K	K	K	K	K	K	K	K	K	K	K	K
SCRI_RS_208662	3H	73.017	3H	77.21	K	K	K	K	K	K	K	K	K	K	K	K	K	K	K	K	K	K	K	K	W	K	W	W	W	W	K	K	K	K	K	K	K	K	K	K	K	K	K	K	K	K	K	K	K
SCRI_RS_178618	3H	73.1586	3H	77.41	K	K	K	K	K	K	K	K	K	K	K	K	K	K	K	K	K	K	K	K	W	K	W	W	W	W	K	K	K	K	K	K	K	K	K	K	K	K	K	K	K	K	K	K	K
SCRI_RS_155763	3H	74.7875	3H	79.01	K	K	K	K	K	K	K	K	K	K	K	K	K	K	K	K	K	K	K	K	W	K	W	W	W	W	K	K	K	K	K	K	K	K	K	K	K	K	K	K	K	K	K	K	K
BOPA2_12_30278	3H	74.7875	3H	73.91	K	K	K	K	K	K	K	K	K	K	K	K	K	K	K	K	K	K	K	K	W	K	W	W	W	W	K	K	K	K	K	K	K	K	K	K	K	K	K	K	K	K	K	K	K
SCRI_RS_233246	3H	74.7875	-	-	K	K	K	K	K	K	K	K	K	K	K	K	K	K	K	K	K	K	K	K	W	K	W	W	W	W	K	K	K	K	K	K	K	K	K	K	K	K	K	K	K	K	K	K	K
SCRI_RS_14456	3H	74.7875	-	-	K	K	K	K	K	K	K	K	K	K	K	K	K	K	K	K	K	K	K	K	W	K	W	W	W	W	K	K	K	K	K	K	K	K	K	K	K	K	K	K	K	K	K	K	K
SCRI_RS_146347	3H	75.2125	3H	79.41	K	K	K	K	K	K	K	K	K	K	K	K	K	K	K	K	K	K	K	K	W	K	W	W	W	W	K	K	K	K	K	K	K	K	K	K	K	K	K	K	K	K	K	K	K
SCRI_RS_206471	3H	75.2125	3H	79.41	K	K	K	K	K	K	K	K	K	K	K	K	K	K	K	K	K	K	K	K	W	K	W	W	W	W	K	K	K	K	K	K	K	K	K	K	K	K	K	K	K	K	K	K	K
SCRI_RS_95272	3H	75.7082	3H	80.71	K	K	K	K	K	K	K	K	K	K	K	K	K	K	K	K	K	K	K	K	W	K	W	W	W	W	K	K	K	K	K	K	K	K	K	K	K	K	K	K	K	K	K	K	K
SCRI_RS_199922	3H	75.7082	3H	80.71	K	K	K	K	K	K	K	K	K	K	K	K	K	K	K	K	K	K	K	K	W	K	W	W	W	W	K	K	K	K	K	K	K	K	K	K	K	K	K	K	K	K	K	K	K
SCRI_RS_191130	3H	75.7082	-	-	K	K	K	K	K	K	K	K	K	K	K	K	K	K	K	K	K	K	K	K	W	K	W	W	W	K	K	K	K	K	K	K	K	K	K	K	K	K	K	K	K	K	K	K	K
SCRI_RS_159006	3H	75.9207	3H	81.11	K	K	K	K	K	K	K	K	K	K	K	K	K	K	K	K	K	K	K	K	W	K	W	W	W	W	K	H	K	K	K	K	K	K	K	K	K	K	K	K	K	K	K	K	K
BOPA1_8020-87	3H	76.204	3H	81.11	K	K	K	K	K	K	K	K	K	K	K	K	K	K	K	K	K	K	H	K	W	K	W	W	W	W	K	H	K	K	K	K	K	K	K	K	K	K	K	K	K	K	K	K	K
SCRI_RS_182014	3H	76.3456	3H	81.21	K	K	K	K	K	K	K	K	K	K	K	K	K	K	K	K	K	K	H	K	W	K	W	W	W	H	K	H	K	K	K	K	K	K	K	K	K	K	K	K	K	K	K	K	K
SCRI_RS_231362	3H	76.3456	3H	81.21	K	K	K	K	K	K	K	K	K	K	K	K	K	K	K	K	K	K	H	K	W	K	W	W	W	H	K	H	K	K	K	K	K	K	K	K	K	K	K	K	K	K	K	K	K
SCRI_RS_116760	3H	76.3456	3H	81.21	K	K	K	K	K	K	K	K	K	K	K	K	K	K	K	K	K	K	H	K	W	K	W	W	W	H	K	H	K	K	K	K	K	K	K	K	K	K	K	K	K	K	K	K	K
BOPA2_12_30325	3H	77.1246	3H	82.11	K	K	K	K	K	K	K	K	K	K	K	K	K	K	K	K	K	K	M	K	W	K	W	W	W	H	K	H	K	K	K	K	K	K	K	K	K	W	K	W	W	K	K	K	K
SCRI_RS_143933	3H	77.4079	3H	82.19	K	K	K	K	K	K	K	K	K	K	K	K	K	K	K	K	K	K	H	K	W	K	W	W	W	H	K	H	K	K	K	K	K	K	K	K	K	W	K	W	W	K	K	K	K
SCRI_RS_826	3H	77.4079	3H	82.19	K	K	K	K	K	K	K	K	K	K	K	K	K	K	K	K	K	K	M	K	W	K	W	W	W	H	K	H	K	K	K	K	K	K	K	K	K	W	K	W	W	K	K	K	K
BOPA1_963-386	3H	77.6912	3H	82.19	K	M	K	K	K	K	K	K	K	K	K	K	K	K	K	K	K	K	H	K	W	K	W	W	W	H	K	H	K	K	K	K	K	K	K	K	K	W	K	W	W	K	K	K	K
SCRI_RS_219733	3H	77.6912	3H	82.19	K	K	K	K	K	K	K	K	K	K	K	K	K	K	K	K	K	K	M	K	W	K	W	W	W	H	K	M	K	K	K	K	K	K	K	K	K	W	K	W	W	K	K	K	K
BOPA1_5224-1560	3H	77.6912	3H	82.19	K	H	K	K	K	K	K	K	K	K	K	K	K	K	K	K	K	K	H	K	W	K	W	W	W	H	K	H	K	K	K	K	K	K	K	K	K	W	K	W	W	K	K	K	K
SCRI_RS_146429	3H	83.0737	3H	86.87	K	M	K	K	K	K	K	K	K	K	K	K	K	K	K	K	K	K	M	W	W	K	W	W	W	H	K	H	K	K	K	K	K	K	K	K	K	W	K	W	W	K	K	K	K
SCRI_RS_192761	3H	83.7819	3H	87.57	K	H	K	K	K	K	K	K	K	K	K	K	K	K	K	K	K	K	H	W	K	K	K	W	W	M	K	H	K	K	K	K	K	K	K	K	K	W	K	W	W	K	K	K	K
BOPA1_9683-140	3H	86.1898	3H	89.77	K	H	K	K	K	K	K	K	K	K	K	K	K	K	K	K	K	K	H	W	K	K	K	W	W	H	K	H	H	K	K	K	K	K	K	K	K	K	K	K	K	K	K	K	K
SCRI_RS_166119	3H	86.1898	3H	89.77	K	H	K	K	K	K	K	K	K	K	K	K	K	K	K	K	K	K	M	W	K	K	K	W	W	H	K	H	M	K	K	K	K	K	K	K	K	K	K	K	K	K	K	K	K
BOPA1_5797-777	3H	86.3314	3H	89.77	K	H	K	K	K	K	K	K	K	K	K	K	K	K	K	K	K	K	H	W	K	K	K	W	W	H	K	H	H	K	K	K	K	K	K	K	K	K	K	K	K	K	K	K	K
BOPA2_12_10074	3H	86.4023	3H	89.77	K	H	K	K	K	K	K	K	K	K	K	K	K	K	K	K	K	K	H	W	K	K	K	W	W	H	K	H	H	K	K	K	K	K	K	K	K	K	K	K	K	K	K	K	K
SCRI_RS_174067	3H	88.2436	3H	90.78	K	W	K	K	K	K	K	K	K	K	K	K	K	K	K	K	K	K	H	W	K	K	K	W	K	M	K	H	W	W	K	K	K	K	K	K	K	K	K	K	K	K	K	K	K
SCRI_RS_165444	3H	88.2436	-	-	K	W	K	K	K	K	K	K	K	K	K	K	K	K	K	K	K	K	M	W	K	K	K	W	K	W	K	M	W	W	K	K	K	K	K	K	K	K	K	K	K	K	K	K	K
SCRI_RS_159046	3H	88.2436	-	-	K	M	K	K	K	K	K	K	K	K	K	K	K	K	K	K	K	K	M	W	K	K	K	W	K	H	K	M	W	W	K	K	K	K	K	K	K	K	K	K	K	K	K	K	K
BOPA1_6302-250	3H	89.4476	3H	92.18	K	K	K	K	K	K	K	K	K	K	K	K	K	K	K	K	K	K	M	K	K	K	K	W	K	W	K	H	W	W	K	K	K	K	K	K	K	K	K	K	K	K	K	K	K
SCRI_RS_3125	3H	89.8725	3H	92.18	K	K	K	K	K	K	K	K	K	K	K	K	K	K	K	K	K	K	K	K	K	K	K	W	K	W	K	H	W	W	K	K	K	K	K	K	K	K	K	K	K	K	K	K	K
SCRI_RS_229593	3H	90.0142	3H	92.18	K	K	K	K	K	K	K	K	K	K	K	K	K	K	K	K	K	K	K	K	K	K	K	W	K	W	K	M	W	W	K	K	K	K	K	K	K	K	K	K	K	K	K	K	K
SCRI_RS_162929	3H	90.0142	3H	92.18	K	K	K	K	K	K	K	K	K	K	K	K	K	K	K	K	K	K	K	K	K	K	K	W	K	W	K	H	W	W	K	K	K	K	K	K	K	K	K	K	K	K	K	K	K
SCRI_RS_120503	3H	90.2266	3H	92.98	K	K	K	K	K	K	K	K	K	K	K	K	K	K	K	K	K	K	K	K	K	K	K	W	K	W	K	H	W	W	K	K	K	K	K	K	K	K	K	K	K	K	K	K	K
SCRI_RS_228486	3H	90.4391	3H	93.23	K	K	K	K	K	K	K	K	K	K	K	K	K	K	K	K	K	K	K	K	K	K	K	W	K	W	K	H	W	W	K	K	K	K	K	K	K	K	K	K	K	K	K	K	K
SCRI_RS_235238	3H	90.4391	-	-	K	K	K	K	K	K	K	K	K	K	K	K	K	K	K	K	K	K	K	K	K	K	K	W	K	W	K	H	W	W	K	K	K	K	K	K	K	K	K	K	K	K	K	K	K
SCRI_RS_115925	3H	90.5807	3H	93.43	K	K	K	K	K	K	K	K	K	K	K	K	K	K	K	K	K	K	K	K	K	K	K	W	K	W	K	H	W	W	K	K	K	K	K	K	K	K	K	K	K	K	K	K	K
BOPA2_12_10344	3H	90.864	3H	94.03	K	K	K	K	K	K	K	K	K	K	K	K	K	K	K	K	K	K	K	K	K	K	K	W	K	W	K	H	W	W	K	K	K	K	K	K	K	K	K	K	K	K	K	K	K
SCRI_RS_140043	3H	96.3173	-	-	K	K	K	K	K	K	K	K	K	K	K	K	K	K	K	K	K	K	K	K	K	K	K	K	K	K	K	H	W	W	K	K	K	K	K	K	K	K	K	K	K	K	K	K	K
BOPA1_6871-945	3H	96.4589	3H	99.46	K	K	K	K	K	K	K	K	K	K	K	K	K	K	K	K	K	K	K	K	K	K	K	K	K	K	K	M	W	W	K	K	K	K	K	K	K	K	K	K	K	K	K	K	K
BOPA1_7241-553	3H	96.4589	3H	99.46	K	K	K	K	K	K	K	K	K	K	K	K	K	K	K	K	K	K	K	K	K	K	K	K	K	K	K	H	W	W	K	K	K	K	K	K	K	K	K	K	K	K	K	K	K
BOPA1_5253-1318	3H	97.5921	3H	100.56	K	K	K	K	K	K	K	K	K	K	K	K	K	K	K	K	K	K	K	K	K	K	K	K	K	K	K	H	W	W	K	K	K	K	K	K	K	K	K	K	K	K	K	K	K
SCRI_RS_142438	3H	97.5921	-	-	K	K	K	K	K	K	K	K	K	K	K	K	K	K	K	K	K	K	K	K	K	K	K	K	K	K	K	H	W	W	K	K	K	K	K	K	K	K	K	K	K	K	K	K	K
SCRI_RS_114333	3H	98.2295	3H	101.16	K	K	K	K	K	K	K	K	K	K	K	K	K	K	K	K	K	K	K	K	K	K	K	K	K	K	K	H	W	W	K	K	K	K	K	K	K	K	K	K	K	K	K	K	K
SCRI_RS_116542	3H	98.5127	3H	101.46	K	K	K	K	K	K	K	K	K	K	K	K	K	K	K	K	K	K	K	K	K	K	K	K	K	K	K	H	W	W	K	K	K	K	K	K	K	K	K	K	K	K	K	K	K
BOPA1_1435-670	3H	98.6544	3H	101.66	K	K	K	K	K	K	K	K	K	K	K	K	K	K	K	K	K	K	K	K	K	K	K	K	K	K	K	H	W	W	K	K	K	K	K	K	K	K	K	K	K	K	K	K	K
SCRI_RS_138983	3H	98.6544	3H	101.86	K	K	K	K	K	K	K	K	K	K	K	K	K	K	K	K	K	K	K	K	K	K	K	K	K	K	K	H	W	W	K	K	K	K	K	K	K	K	K	K	K	K	K	K	K
BOPA1_2500-1514	3H	100.283	3H	103.86	K	K	K	K	K	K	M	K	K	K	K	K	K	K	K	K	K	K	K	K	K	K	K	K	K	K	W	H	W	W	W	K	K	K	K	K	K	K	K	K	K	K	K	K	W
SCRI_RS_206510	3H	103.754	3H	106.96	K	K	K	K	K	K	H	K	K	K	K	K	K	K	K	K	K	K	K	K	K	K	K	K	K	K	W	H	W	W	W	K	K	K	K	K	K	K	K	K	K	K	K	K	W
SCRI_RS_5194	3H	103.754	3H	106.96	K	K	K	K	K	K	H	K	K	K	K	K	K	K	K	K	K	K	K	K	K	K	K	K	K	K	W	H	W	W	W	K	K	K	K	K	K	K	K	K	K	K	K	K	W
SCRI_RS_151711	3H	104.32	3H	107.46	K	K	K	K	K	K	H	K	K	K	K	K	K	K	K	K	K	K	K	K	K	K	K	K	K	K	W	H	W	W	W	K	K	K	K	K	K	K	K	K	K	K	K	K	W
BOPA2_12_30926	3H	104.462	-	-	K	K	K	K	K	K	H	K	K	K	K	K	K	K	K	K	K	K	K	K	K	K	K	K	K	K	W	H	W	W	W	K	K	K	K	K	K	K	K	K	K	K	K	K	W
BOPA1_ABC13753-1-2-167	3H	105.312	3H	108.04	K	K	K	K	K	K	H	K	K	K	K	K	K	K	K	K	K	K	H	K	H	K	W	K	K	K	W	H	W	W	W	K	K	K	K	K	K	K	K	K	K	K	K	K	W
BOPA2_12_31499	3H	105.949	3H	109.12	K	K	K	K	K	K	M	K	K	K	K	K	K	K	K	K	K	K	M	K	M	K	W	K	K	K	W	H	W	W	W	K	K	K	K	K	K	K	K	K	K	K	K	K	W
BOPA1_5488-1097	3H	106.091	3H	109.12	K	K	K	K	K	K	H	K	K	K	K	K	K	K	K	K	K	K	H	K	H	K	W	K	K	K	W	H	W	W	W	K	K	K	K	K	K	K	K	K	K	K	K	K	W
BOPA2_12_30274	3H	107.79	3H	111.7	K	K	K	K	K	K	H	K	K	K	K	K	K	K	K	K	K	K	H	K	H	K	W	K	K	K	W	H	W	W	W	K	K	K	K	K	K	K	K	K	K	K	K	K	W
SCRI_RS_183638	3H	107.79	3H	111.7	K	K	K	K	K	K	H	K	K	K	K	K	K	K	K	K	K	K	H	K	H	K	W	K	K	K	W	H	W	W	W	K	K	K	K	K	K	K	K	K	K	K	K	K	W
SCRI_RS_203905	3H	107.79	3H	111.7	K	K	K	K	K	K	H	K	K	K	K	K	K	K	K	K	K	K	H	K	H	K	W	K	K	K	W	H	W	W	W	K	K	K	K	K	K	K	K	K	K	K	K	K	W
SCRI_RS_150063	3H	107.79	3H	111.7	K	K	K	K	K	K	H	K	K	K	K	K	K	K	K	K	K	K	M	K	M	K	W	K	K	K	W	H	W	W	W	K	K	K	K	K	K	K	K	K	K	K	K	K	W
SCRI_RS_150944	3H	107.79	-	-	K	K	K	K	K	K	M	K	K	K	K	K	K	K	K	K	K	K	M	K	M	K	W	K	K	K	W	H	W	W	W	K	K	K	K	K	K	K	K	K	K	K	K	K	W
BOPA2_12_31525	3H	108.074	3H	112.34	K	K	K	K	K	K	H	K	K	K	K	K	K	K	K	K	K	K	H	K	H	K	W	K	K	K	W	H	W	W	W	K	K	K	K	K	K	K	K	K	K	K	K	K	W
BOPA1_5260-462	3H	108.569	3H	112.34	K	K	K	K	K	K	H	K	K	K	K	K	K	K	K	K	K	K	M	K	M	K	W	K	K	K	W	H	W	W	W	K	K	K	K	K	K	K	K	K	K	K	K	K	W
SCRI_RS_120973	3H	108.569	3H	112.54	K	K	K	K	K	K	H	K	K	K	K	K	K	K	K	K	K	K	H	K	H	K	W	K	K	K	W	H	W	W	W	K	K	K	K	K	K	K	K	K	K	K	K	K	W
SCRI_RS_181071	3H	108.569	3H	112.54	K	K	K	K	K	K	H	K	K	K	K	K	K	K	K	K	K	K	H	K	H	K	W	K	K	K	W	H	W	W	W	K	K	K	K	K	K	K	K	K	K	K	K	K	W
SCRI_RS_121052	3H	108.853	3H	112.84	K	K	K	K	K	K	M	K	K	K	K	K	K	K	K	K	K	K	H	K	H	K	W	K	K	K	W	H	W	W	W	K	K	K	K	K	K	K	K	K	K	K	K	K	W
SCRI_RS_103215	3H	109.207	3H	113.07	K	K	K	K	K	K	H	K	K	K	K	K	K	K	K	K	K	K	H	K	H	K	W	K	K	K	W	H	W	W	W	K	K	K	K	K	K	K	K	K	K	K	K	K	W
SCRI_RS_165334	3H	109.207	3H	113.07	K	K	K	K	K	K	H	K	K	K	K	K	K	K	K	K	K	K	M	K	M	K	W	K	K	K	W	H	W	W	W	K	K	K	K	K	K	K	K	K	K	K	K	K	W
BOPA1_6069-304	3H	109.207	3H	113.39	K	K	K	K	K	K	H	K	K	K	K	K	K	K	K	K	K	K	H	K	H	K	W	K	K	K	W	H	W	W	W	K	K	K	K	K	K	K	K	K	K	K	K	K	W
BOPA1_3965-353	3H	109.49	3H	113.42	K	K	K	K	K	K	M	K	K	K	K	K	K	K	K	K	K	K	H	K	H	K	W	K	K	K	W	M	H	K	W	K	K	K	K	K	K	K	K	K	K	K	K	K	W
BOPA2_12_31238	3H	109.844	3H	113.42	K	K	K	K	K	K	H	K	K	K	K	K	K	K	K	K	K	K	H	K	H	K	W	K	K	K	W	H	H	K	W	K	K	K	K	K	K	K	K	K	K	K	K	K	W
BOPA2_12_30972	3H	115.935	3H	119.77	K	K	K	K	K	K	K	K	K	K	K	K	K	K	K	K	K	K	H	K	H	K	M	K	K	K	K	M	W	K	W	K	K	K	K	K	K	K	K	K	K	K	K	K	W
SCRI_RS_146012	3H	116.36	3H	119.77	K	K	K	K	K	K	K	K	K	K	K	K	K	K	K	K	K	K	H	K	H	K	H	K	K	K	K	H	W	K	W	K	K	K	K	K	K	K	K	K	K	K	K	K	W
BOPA1_3718-1026	3H	116.997	3H	119.77	H	K	K	K	K	K	K	K	K	K	K	K	K	K	K	K	K	K	H	K	H	K	H	K	K	K	K	H	W	K	W	K	K	K	K	K	K	K	K	K	K	K	K	K	W
SCRI_RS_146197	3H	116.997	3H	120.87	H	K	K	K	K	K	K	K	K	K	K	K	K	K	K	K	K	K	H	K	H	K	H	K	K	K	K	H	W	K	W	K	K	K	K	K	K	K	K	K	K	K	K	K	W
BOPA2_12_30973	3H	117.635	3H	121.02	H	K	K	K	K	K	K	K	K	K	K	K	K	K	K	K	K	K	H	K	M	K	H	K	K	K	K	M	W	K	W	K	K	K	K	K	K	K	K	K	K	K	K	K	W
SCRI_RS_167755	3H	118.201	3H	122.07	M	K	K	K	K	K	K	K	K	K	K	K	K	K	K	K	K	K	M	K	H	K	H	K	K	K	K	K	W	K	W	K	K	K	K	K	K	K	K	K	K	K	K	K	W
SCRI_RS_189161	3H	120.68	3H	124.57	M	K	K	K	K	K	K	K	K	K	K	K	K	K	K	K	K	K	H	K	H	K	H	K	K	K	K	W	W	K	W	W	W	M	K	K	K	K	K	K	K	K	K	K	W
SCRI_RS_13871	3H	120.68	3H	124.57	H	K	K	K	K	K	K	K	K	K	K	K	K	K	K	K	K	K	H	K	H	K	H	K	K	K	K	W	W	K	W	W	W	M	K	K	K	K	K	K	K	K	K	K	W
BOPA2_12_10122	3H	120.892	3H	125.23	H	K	K	K	K	K	K	K	K	K	K	K	K	K	K	K	K	K	H	K	H	K	H	K	K	K	K	W	W	K	W	W	W	H	K	K	K	K	K	K	K	K	K	K	W
BOPA1_2754-1027	3H	122.025	3H	126.26	M	K	K	K	K	K	K	K	K	K	K	K	K	K	K	K	K	K	M	K	M	K	M	K	K	K	K	W	W	K	W	W	W	M	K	K	K	K	K	K	K	K	K	K	W
BOPA1_2847-485	3H	122.025	3H	125.23	H	K	K	K	K	K	K	K	K	K	K	K	K	K	K	K	K	K	H	K	H	K	H	K	K	K	K	W	W	K	W	W	W	M	K	K	K	K	K	K	K	K	K	K	W
BOPA1_9618-372	3H	122.025	3H	126.26	H	K	K	K	K	K	K	K	K	K	K	K	K	K	K	K	K	K	H	K	H	K	H	K	K	K	K	W	W	K	W	W	W	H	K	K	K	K	K	K	K	K	K	K	W
SCRI_RS_202428	3H	122.592	3H	126.41	H	K	K	K	K	K	K	K	K	K	K	K	K	K	K	K	K	K	H	K	H	K	H	K	K	K	K	W	W	K	W	W	W	M	K	K	K	K	K	K	K	K	K	K	W
BOPA2_12_31251	3H	123.371	3H	127.38	H	K	K	K	K	K	K	K	K	K	K	K	K	K	K	K	K	K	H	K	M	K	H	K	K	K	K	W	W	K	W	W	W	M	K	K	K	K	K	K	K	K	K	K	W
BOPA2_12_30367	3H	126.062	3H	128.53	H	K	K	K	K	K	K	K	K	K	K	K	K	K	K	K	K	K	H	K	M	K	H	K	K	K	K	W	W	K	W	W	W	W	K	K	K	K	K	K	K	K	K	K	W
BOPA1_5008-2402	3H	126.7	3H	128.53	H	K	K	K	K	K	K	K	K	K	K	K	K	K	K	K	K	K	H	K	M	K	H	K	K	K	K	W	W	K	W	W	W	W	K	K	K	K	K	K	K	K	K	K	W
SCRI_RS_213950	3H	126.7	3H	128.53	H	K	K	K	K	K	K	K	K	K	K	K	K	K	K	K	K	K	H	K	H	K	H	K	K	K	K	W	W	K	W	W	W	W	K	K	K	K	K	K	K	K	K	K	W
SCRI_RS_10016	3H	126.7	3H	128.53	H	K	K	K	K	K	K	K	K	K	K	K	K	K	K	K	K	K	H	K	H	K	H	K	K	K	K	W	W	K	W	W	W	W	K	K	K	K	K	K	K	K	K	K	W
SCRI_RS_175038	3H	127.266	3H	129.13	K	K	K	K	K	K	K	K	K	K	K	K	K	K	K	K	K	K	H	K	M	K	H	K	K	K	K	W	W	K	W	W	W	W	K	K	K	K	K	K	K	K	K	K	K
BOPA2_12_30137	3H	127.975	3H	129.59	K	K	K	K	K	K	K	K	K	K	K	K	K	K	K	K	K	K	H	K	M	K	H	K	K	K	K	W	W	K	W	W	W	W	K	K	K	K	K	K	K	K	K	K	K
SCRI_RS_113112	3H	128.612	3H	130.43	K	K	K	K	K	K	K	K	K	K	K	K	K	K	K	K	K	K	H	K	M	K	H	K	K	K	K	W	W	K	W	W	W	W	K	K	K	K	K	K	K	K	K	K	K
SCRI_RS_231382	3H	128.754	3H	130.63	K	K	K	K	K	K	K	K	K	K	K	K	K	K	K	K	K	K	H	K	H	K	H	K	K	K	K	W	W	K	W	W	W	W	K	K	K	K	K	K	K	K	K	K	K
BOPA2_12_30482	3H	128.754	-	-	K	K	K	K	K	K	K	K	K	K	K	K	K	K	K	K	K	K	H	K	M	K	H	K	K	K	K	W	W	K	W	W	W	W	K	K	K	K	K	K	K	K	K	K	K
SCRI_RS_183550	3H	131.586	3H	133.78	K	K	K	K	K	K	K	K	K	K	K	K	K	K	K	K	K	K	H	K	H	K	H	K	K	K	K	W	W	K	W	W	W	W	K	K	K	K	K	K	K	K	K	K	K
SCRI_RS_169325	3H	131.657	3H	133.88	K	K	K	K	K	K	K	K	K	K	K	K	K	K	K	K	K	K	H	K	W	K	H	K	K	K	K	W	W	K	K	W	W	W	K	K	K	K	K	K	K	K	K	K	K
SCRI_RS_175220	3H	131.657	3H	133.88	K	K	K	K	K	K	K	K	K	K	K	K	K	K	K	K	K	K	H	K	M	K	H	K	K	K	K	W	W	K	K	W	W	W	K	K	K	K	K	K	K	K	K	K	K
SCRI_RS_167698	3H	132.011	3H	134.18	K	K	K	K	K	K	K	K	K	K	K	K	K	K	K	K	K	K	H	K	H	K	H	K	K	K	K	W	W	K	K	W	W	W	K	K	K	K	K	K	K	K	K	K	K
SCRI_RS_144559	3H	132.932	3H	135.08	K	K	K	K	K	K	K	K	K	K	K	K	K	K	K	K	K	K	H	K	H	K	H	K	K	K	K	W	W	K	K	W	W	W	K	K	K	K	K	K	K	K	K	K	K
SCRI_RS_209285	3H	132.932	-	-	K	K	K	K	K	K	K	K	K	K	K	K	K	K	K	K	K	K	H	K	H	K	H	K	K	K	K	W	W	K	W	W	W	W	K	K	K	K	K	K	K	K	K	K	K
SCRI_RS_1793	3H	133.286	3H	135.48	K	K	K	K	K	K	K	K	K	K	K	K	K	K	K	K	K	K	M	K	K	K	K	K	K	K	K	W	W	K	K	W	W	W	K	K	K	K	K	K	K	K	K	K	K
SCRI_RS_165044	3H	135.482	3H	138.32	K	K	K	K	K	K	K	K	K	K	K	K	K	K	K	K	K	K	K	K	K	K	K	K	K	K	K	M	M	K	K	M	M	M	K	K	K	K	K	K	K	K	K	K	K
SCRI_RS_189186	3H	135.482	3H	138.32	K	K	K	K	K	K	K	K	K	K	K	K	K	K	K	K	K	K	H	K	K	K	K	K	K	K	K	W	W	K	K	W	W	W	K	K	K	K	K	K	K	K	K	K	K
SCRI_RS_144313	3H	135.482	3H	138.32	K	K	K	K	K	K	K	K	K	K	K	K	K	K	K	K	K	K	H	K	K	K	K	K	K	K	K	W	W	K	K	W	W	W	K	K	K	K	K	K	K	K	K	K	K
SCRI_RS_189710	3H	135.623	3H	138.42	K	K	K	K	K	K	K	K	K	K	K	K	K	K	K	K	K	K	M	K	K	K	K	K	K	K	K	W	W	K	K	W	W	W	K	K	K	K	K	K	K	K	K	K	K
SCRI_RS_208722	3H	137.606	3H	140.42	K	K	K	K	K	K	K	K	K	K	K	K	K	K	K	K	K	K	K	K	K	K	K	K	K	K	K	W	W	K	K	W	W	W	K	K	K	K	K	K	K	K	K	K	K
SCRI_RS_10019	3H	137.606	-	-	K	K	K	K	K	K	K	K	K	K	K	K	K	K	K	K	K	K	K	K	K	K	K	K	K	K	K	W	W	K	K	W	W	W	K	K	K	K	K	K	K	K	K	K	K
BOPA2_12_31500	3H	137.89	3H	141.2	K	K	K	K	K	K	K	K	K	K	K	K	K	K	K	K	K	K	K	K	K	K	K	K	K	K	K	W	W	K	K	W	W	W	K	K	K	K	K	K	K	K	K	K	K
SCRI_RS_157113	3H	139.164	3H	145.29	K	K	K	K	K	K	K	K	K	K	K	K	K	K	K	K	K	K	K	K	K	K	K	K	K	K	K	W	W	K	K	W	W	K	K	K	K	K	K	K	K	K	K	K	K
BOPA2_12_30921	3H	139.306	3H	145.65	K	K	K	K	K	K	K	K	K	K	K	K	K	K	K	K	K	K	K	K	K	K	K	K	K	K	K	W	W	K	K	W	W	K	K	K	K	K	K	K	K	K	K	K	K
SCRI_RS_151868	3H	139.306	3H	145.39	M	M	K	K	K	K	K	K	K	K	K	K	K	K	M	K	K	M	K	K	M	K	M	K	K	M	K	W	M	K	M	W	W	K	M	K	M	M	K	K	K	K	K	M	K
BOPA1_ConsensusGBS0038-2	3H	139.589	3H	145.65	K	K	K	K	K	K	K	K	K	K	K	K	K	K	K	K	K	K	K	K	K	K	K	K	K	K	K	W	W	K	K	W	W	K	K	K	K	K	K	K	K	K	K	K	K
SCRI_RS_201075	3H	139.589	3H	145.69	K	K	K	K	K	K	K	K	K	K	K	K	K	K	K	K	K	K	K	K	K	K	K	K	K	K	K	W	W	K	K	W	W	K	K	K	K	K	K	K	K	K	K	K	K
SCRI_RS_154449	3H	139.589	-	-	K	K	K	K	K	K	K	K	K	K	K	K	K	K	K	K	K	K	K	K	K	K	K	K	K	K	K	W	W	K	K	W	W	K	W	K	K	K	K	K	K	K	K	K	K
BOPA1_4403-885	3H	142.139	3H	148.99	K	K	K	K	K	K	K	K	K	K	K	K	K	K	K	K	K	K	K	K	K	K	K	K	K	K	K	W	W	K	K	W	W	K	W	K	K	K	K	K	K	K	K	K	K
SCRI_RS_224468	3H	142.139	3H	148.19	K	K	K	K	K	K	K	K	K	K	K	K	K	K	K	K	K	K	K	K	K	K	K	K	K	K	K	W	W	K	K	W	W	K	W	K	K	K	K	K	K	K	K	K	K
SCRI_RS_164726	3H	142.139	3H	148.19	K	K	K	K	K	K	K	K	K	K	K	K	K	K	K	K	K	K	K	K	K	K	K	K	K	K	K	W	W	K	K	W	W	K	W	K	K	K	K	K	K	K	K	K	K
SCRI_RS_173623	3H	142.21	3H	148.99	K	K	K	K	K	K	K	K	K	K	K	K	K	K	K	K	K	K	K	K	K	K	K	K	K	K	K	W	W	K	K	W	W	K	W	K	K	K	K	K	K	K	K	K	K
SCRI_RS_238412	3H	143.13	-	-	K	K	K	K	K	K	K	K	K	K	K	K	K	K	K	K	K	K	K	K	K	K	K	K	K	K	K	W	W	K	K	W	K	K	W	K	K	K	K	K	K	K	K	K	K
BOPA1_ConsensusGBS0271-2	3H	143.484	3H	149.06	K	K	K	K	K	K	K	K	K	K	K	K	K	K	K	K	K	K	K	K	K	K	K	K	K	K	K	W	W	K	K	W	K	K	W	K	K	K	K	K	K	K	K	K	K
SCRI_RS_176108	3H	143.484	3H	149.59	K	K	K	K	K	K	K	K	K	K	K	K	K	K	K	K	K	K	K	K	K	K	K	K	K	K	K	W	W	K	K	W	K	K	W	K	K	K	K	K	K	K	K	K	K
SCRI_RS_126369	3H	143.98	3H	150.09	K	K	K	K	K	K	K	K	K	K	K	K	K	K	K	K	K	K	K	K	K	K	K	K	K	K	K	W	W	K	K	W	K	K	W	K	K	K	K	K	K	K	K	K	K
SCRI_RS_229623	3H	144.122	3H	150.19	K	K	K	K	K	K	K	K	K	K	K	K	K	K	K	K	K	K	K	K	K	K	K	K	K	K	K	W	W	K	K	W	K	K	W	K	K	K	K	K	K	K	K	K	K
SCRI_RS_216141	3H	144.618	3H	151.99	K	K	K	K	K	K	K	K	K	K	K	K	K	K	K	K	K	K	K	K	K	K	K	K	K	K	K	W	W	K	K	W	K	K	W	K	K	K	K	K	K	K	K	K	K
BOPA1_3682-556	3H	144.901	3H	152.29	K	K	K	K	K	K	K	K	K	K	K	K	K	K	K	K	K	K	K	K	K	K	K	K	K	K	K	W	W	K	K	W	K	K	W	K	K	K	K	K	K	K	K	K	K
SCRI_RS_180847	3H	145.326	3H	152.69	K	K	K	K	K	K	K	K	K	K	K	K	K	K	K	K	K	K	K	K	K	K	K	K	K	K	K	K	W	K	K	W	K	K	W	K	K	K	K	K	K	K	K	K	K
BOPA1_ABC36454-pHv2499-01	3H	145.397	3H	153.39	K	K	K	K	K	K	K	K	K	K	K	K	K	K	K	K	K	K	K	K	K	K	K	K	K	K	K	K	W	K	K	W	K	K	W	K	K	K	K	K	K	K	K	K	K
SCRI_RS_49693	3H	145.538	3H	153.39	K	K	K	K	K	K	K	K	K	K	K	K	K	K	K	K	K	K	K	K	K	K	K	K	K	K	K	K	W	K	K	W	K	K	W	K	K	K	K	K	K	K	K	K	K
BOPA1_ABC38781-pHv2346-01	3H	145.538	3H	151.23	K	K	K	K	K	K	K	K	K	K	K	K	K	K	K	K	K	K	K	K	K	K	K	K	K	K	K	K	W	K	K	W	K	K	W	K	K	K	K	K	K	K	K	K	K
BOPA1_4643-867	3H	145.963	3H	153.39	K	K	K	K	K	K	K	K	K	K	K	K	K	K	K	K	K	K	K	K	K	K	K	K	K	K	K	K	W	K	K	W	K	K	W	K	K	K	K	K	K	K	K	K	K
BOPA1_7169-713	3H	146.105	3H	153.39	K	K	K	K	K	K	K	K	K	K	K	K	K	K	K	K	K	K	K	K	K	K	K	K	K	K	K	K	W	K	K	W	K	K	W	K	K	K	K	K	K	K	K	K	K
SCRI_RS_1435	3H	146.105	3H	153.39	K	K	K	K	K	K	K	K	K	K	K	K	K	K	K	K	K	K	K	K	K	K	K	K	K	K	K	K	W	K	K	W	K	K	W	K	K	K	K	K	K	K	K	K	K
BOPA2_12_30736	3H	148.159	3H	153.39	K	K	K	K	K	K	K	K	K	K	K	K	K	K	K	K	K	K	K	K	K	K	K	K	K	K	K	K	W	K	K	W	K	K	W	K	K	K	K	K	K	K	K	K	K
SCRI_RS_204353	3H	148.159	-	-	K	K	K	K	K	K	K	K	K	K	K	K	K	K	K	K	K	K	K	K	K	K	K	K	K	K	K	K	W	K	K	W	K	K	W	K	K	K	K	K	K	K	K	K	K
SCRI_RS_206475	3H	148.159	-	-	K	K	K	K	K	K	K	K	K	K	K	K	K	K	K	K	K	K	K	K	K	K	K	K	K	K	K	K	W	K	K	W	K	K	W	K	K	K	K	K	K	K	K	K	K
SCRI_RS_237894	3H	148.159	-	-	K	K	K	K	K	K	K	K	K	K	K	K	K	K	K	K	K	K	K	K	K	K	K	K	K	K	K	K	W	K	K	W	K	K	W	K	K	K	K	K	K	K	K	K	K
SCRI_RS_739	3H	148.159	-	-	K	K	K	K	K	K	K	K	K	K	K	K	K	K	K	K	K	K	K	K	K	K	K	K	K	K	K	K	W	K	K	W	K	K	W	K	K	K	K	K	K	K	K	K	K
SCRI_RS_203164	3H	149.575	3H	154.79	K	K	K	K	K	K	K	K	K	K	K	K	K	K	K	K	K	K	K	K	K	K	K	K	K	K	K	K	M	K	K	M	K	K	M	K	K	K	K	K	K	K	K	K	K
SCRI_RS_184261	3H	154.887	3H	160.09	K	K	K	K	K	K	K	K	K	K	K	K	K	K	K	K	K	K	K	K	K	K	K	K	K	K	K	K	K	K	K	W	K	K	W	K	K	K	K	K	K	K	K	K	K
SCRI_RS_178836	3H	154.887	3H	160.09	K	K	K	K	K	K	K	K	K	K	K	K	K	K	K	K	K	K	K	K	K	K	K	K	K	K	K	K	K	K	K	W	K	K	W	K	K	K	K	K	K	K	K	K	K
BOPA1_265-1229	3H	155.028	3H	164.42	K	K	K	K	K	K	K	K	K	K	K	K	K	K	K	K	K	K	K	K	K	K	K	K	K	K	K	K	K	K	K	W	K	K	K	K	K	K	K	K	K	K	K	K	K
BOPA2_12_30135	3H	155.028	3H	164.42	K	K	K	K	K	K	K	K	K	K	K	K	K	K	K	K	K	K	K	K	K	K	K	K	K	K	K	K	K	K	K	W	K	K	K	K	K	K	K	K	K	K	K	K	K
SCRI_RS_13426	3H	155.028	-	-	K	K	K	K	K	K	K	K	K	K	K	K	K	K	K	K	K	K	K	K	K	K	K	K	K	K	K	K	K	K	K	W	K	K	K	K	K	K	K	K	K	K	K	K	K
SCRI_RS_162720	3H	155.028	-	-	K	K	K	K	K	K	K	K	K	K	K	K	K	K	K	K	K	K	K	K	K	K	K	K	K	K	K	K	K	K	K	W	K	K	K	K	K	K	K	K	K	K	K	K	K
SCRI_RS_128375	3H	155.028	-	-	K	K	K	K	K	K	K	K	K	K	K	K	K	K	K	K	K	K	K	K	K	K	K	K	K	K	K	K	K	K	K	W	K	K	K	K	K	K	K	K	K	K	K	K	K
SCRI_RS_139876	3H	155.028	-	-	K	K	K	K	K	K	K	K	K	K	K	K	K	K	K	K	K	K	K	K	K	K	K	K	K	K	K	K	K	K	K	W	K	K	K	K	K	K	K	K	K	K	K	K	K
BOPA2_12_30764	4H	0.283286	4H	0.71	K	K	K	K	K	K	K	K	K	K	K	K	K	K	K	K	K	K	K	K	K	K	K	K	K	K	K	K	K	K	K	K	K	K	K	K	K	K	K	K	K	K	K	K	K
BOPA1_13301-90	4H	0.495751	4H	1.17	K	K	K	K	K	K	K	K	K	K	K	K	K	K	K	K	K	K	K	K	K	K	K	K	K	K	K	K	K	K	K	K	K	K	K	K	K	K	K	K	K	K	K	K	K
BOPA1_7385-763	4H	1.06232	4H	4.74	K	K	K	K	K	K	K	K	K	K	K	K	K	K	K	K	K	K	K	K	K	K	K	K	K	K	K	K	K	K	K	K	K	K	K	W	K	K	K	K	K	K	K	K	K
SCRI_RS_206744	4H	1.06232	-	-	K	K	K	K	K	K	K	K	K	K	K	K	K	K	K	K	K	K	K	K	K	K	K	K	K	K	K	K	K	K	K	K	K	K	K	W	K	K	K	K	K	K	K	K	K
SCRI_RS_222283	4H	1.06232	-	-	K	K	K	K	K	K	K	K	K	K	K	K	K	K	K	K	K	K	K	K	K	K	K	K	K	K	K	K	K	K	K	K	K	K	K	W	K	K	K	K	K	K	K	K	K
SCRI_RS_145228	4H	1.06232	-	-	K	K	K	K	K	K	K	K	K	K	K	K	K	K	K	K	K	K	K	K	K	K	K	K	K	K	K	K	K	K	K	K	K	K	K	W	K	K	K	K	K	K	K	K	K
BOPA1_2533-773	4H	1.13314	4H	9.14	K	K	K	K	K	K	K	K	K	K	K	K	K	K	K	K	K	K	K	K	K	K	K	K	K	K	K	K	K	K	K	K	K	K	K	W	K	K	K	K	K	K	K	K	K
SCRI_RS_175862	4H	1.13314	-	-	K	K	M	K	K	K	K	M	M	K	K	K	K	K	K	K	M	K	M	M	K	M	K	K	M	K	M	M	K	K	K	K	M	M	K	W	K	K	K	M	M	K	K	K	M
SCRI_RS_203148	4H	1.13314	-	-	K	K	K	K	K	K	K	K	K	K	K	K	K	K	K	K	K	K	K	K	K	K	K	K	K	K	K	K	K	K	K	K	K	K	K	W	K	K	K	K	K	K	K	K	K
SCRI_RS_100278	4H	1.13314	-	-	K	K	K	K	K	K	K	K	K	K	K	K	K	K	K	K	K	K	K	K	K	K	K	K	K	K	K	K	K	K	K	K	K	K	K	K	K	K	K	K	K	K	K	K	K
SCRI_RS_126417	4H	1.13314	-	-	K	K	K	K	K	K	K	K	K	K	K	K	K	K	K	K	K	K	K	K	K	K	K	K	K	K	K	K	K	K	K	K	K	K	K	K	K	K	K	K	K	K	K	K	K
SCRI_RS_219136	4H	1.13314	-	-	K	K	K	K	K	K	K	K	K	K	K	K	K	K	K	K	K	K	K	K	K	K	K	K	K	K	K	K	K	K	K	K	K	K	K	W	K	K	K	K	K	K	K	K	K
SCRI_RS_154517	4H	2.90368	4H	3.31	K	K	K	K	K	K	K	K	K	K	K	K	K	K	K	K	K	K	K	K	K	K	K	K	K	K	K	K	K	K	K	K	K	K	K	K	K	K	K	K	K	K	K	K	K
BOPA1_6133-774	4H	3.47025	4H	3.91	K	K	K	K	K	K	K	K	K	K	K	K	K	K	K	K	K	K	K	K	K	K	K	K	K	K	K	K	K	K	K	K	K	K	K	W	K	K	K	K	K	K	K	K	K
SCRI_RS_231066	4H	3.6119	-	-	K	K	K	K	K	K	K	K	K	K	K	K	K	K	K	K	K	K	K	K	K	K	K	K	K	K	K	K	K	K	K	K	K	K	K	W	K	K	K	K	K	K	K	K	K
SCRI_RS_105960	4H	15.0142	4H	20.44	K	K	K	K	K	K	K	K	K	K	K	K	K	K	K	K	K	K	K	K	K	K	K	K	K	K	K	K	K	K	K	K	K	K	K	W	K	K	K	K	K	K	K	K	K
SCRI_RS_119628	4H	17.847	4H	23.24	K	K	K	K	K	K	K	K	K	K	K	K	K	K	K	K	K	K	K	K	K	K	K	K	K	K	K	K	K	K	K	K	K	K	K	W	W	K	K	K	K	K	K	K	K
BOPA1_8724-1282	4H	17.847	4H	21.74	K	K	K	K	K	K	K	K	K	K	K	K	K	K	K	K	K	K	K	K	K	K	K	K	K	K	K	K	K	K	K	K	K	K	K	W	W	K	K	K	K	K	K	K	K
SCRI_RS_154178	4H	18.4844	4H	24.23	K	K	K	K	K	K	K	K	K	K	K	K	K	K	K	K	K	K	K	K	K	K	K	K	K	K	K	K	K	K	K	K	K	K	K	W	W	K	K	K	K	K	K	K	K
SCRI_RS_190426	4H	18.4844	-	-	K	K	K	K	K	K	K	K	K	K	K	K	K	K	K	K	K	K	K	K	K	K	K	K	K	K	K	K	K	K	K	K	K	K	K	W	K	K	K	K	K	K	K	K	K
BOPA1_1593-1597	4H	22.238	4H	27.64	K	K	K	K	K	K	K	K	K	K	K	K	K	K	K	K	K	K	K	K	K	K	K	K	K	K	K	K	K	K	K	K	K	K	K	W	W	K	K	K	K	K	K	K	K
SCRI_RS_58772	4H	22.238	4H	27.64	K	K	K	K	K	K	K	K	K	K	K	K	K	K	K	K	K	K	K	K	K	K	K	K	K	K	K	K	K	K	K	K	K	K	K	W	W	K	K	K	K	K	K	K	K
SCRI_RS_125487	4H	22.238	-	-	K	K	K	K	K	K	K	K	K	K	K	K	K	K	K	K	K	K	K	K	K	K	K	K	K	K	K	K	K	K	K	K	K	K	K	W	W	K	K	K	K	K	K	K	K
BOPA1_3687-271	4H	25.7082	4H	31.14	K	K	K	K	K	K	K	K	K	K	K	K	K	K	K	K	K	K	K	K	K	K	K	K	K	K	K	K	K	K	K	K	K	K	K	W	W	K	K	K	K	K	K	K	K
BOPA1_6208-987	4H	25.8499	4H	31.14	K	K	K	K	K	K	K	K	K	K	K	K	K	K	K	K	K	K	K	K	K	K	K	K	K	K	K	K	K	K	K	K	K	K	K	W	W	K	K	K	K	K	K	K	K
SCRI_RS_207768	4H	26.3456	4H	31.14	K	K	K	K	K	K	K	K	K	K	K	K	K	K	K	K	K	K	K	K	K	K	K	K	K	K	K	K	K	K	K	K	K	K	K	W	W	K	K	K	K	K	K	K	K
BOPA1_8901-1446	4H	26.3456	4H	32.68	K	K	K	K	K	K	K	K	K	K	K	K	K	K	K	K	K	K	K	K	K	K	K	K	K	K	K	K	K	K	K	K	K	K	K	W	W	K	K	K	K	K	K	K	K
SCRI_RS_202425	4H	26.5581	-	-	K	K	K	K	K	K	K	K	K	K	K	K	K	K	K	K	K	K	K	K	K	K	K	K	K	K	K	K	K	K	K	K	K	K	K	W	W	K	K	K	K	K	K	K	K
BOPA1_1001-1187	4H	27.4788	4H	31.64	K	K	K	K	K	K	K	K	K	K	K	K	K	K	K	K	K	K	K	K	K	K	K	K	K	K	K	K	K	K	K	K	K	K	K	W	W	K	K	K	K	K	K	K	K
SCRI_RS_238822	4H	27.4788	4H	31.64	K	K	K	K	K	K	K	K	K	K	K	K	K	K	K	K	K	K	K	K	K	K	K	K	K	K	K	K	K	K	K	K	K	K	K	W	W	K	K	K	K	K	K	K	K
SCRI_RS_228232	4H	29.8159	4H	33.94	K	K	K	K	K	K	K	K	K	K	K	K	K	K	K	K	K	K	K	K	K	K	K	K	K	K	K	K	K	K	K	K	K	K	K	W	W	K	K	K	K	K	K	K	K
SCRI_RS_157832	4H	30.0283	4H	34.14	K	K	K	K	K	K	K	K	K	K	K	K	K	K	K	K	K	K	K	K	K	K	K	K	K	K	K	K	K	K	K	K	K	K	K	W	W	K	K	K	K	K	K	K	K
BOPA2_12_30864	4H	34.3484	4H	38.44	K	K	K	K	K	K	K	K	K	K	K	K	K	K	K	K	K	K	K	K	K	K	K	K	K	K	K	K	K	K	K	K	K	K	K	W	W	K	K	K	K	K	K	K	K
BOPA1_917-522	4H	34.5609	4H	38.74	K	K	K	K	K	K	K	K	K	K	K	K	K	K	K	K	K	K	K	K	K	K	K	K	K	K	K	K	K	K	K	K	K	K	K	W	W	K	K	K	K	K	K	K	K
BOPA2_12_30150	4H	34.5609	4H	18.47	K	K	K	K	K	K	K	K	K	K	K	K	K	K	K	K	K	K	K	K	K	K	K	K	K	K	K	K	K	K	K	K	K	K	K	W	K	K	K	K	K	K	K	K	K
SCRI_RS_220110	4H	34.5609	-	-	K	K	K	K	K	K	K	K	K	K	K	K	K	K	K	K	K	K	K	K	K	K	K	K	K	K	K	K	K	K	K	K	K	K	K	W	K	K	K	K	K	K	K	K	K
SCRI_RS_197394	4H	34.5609	-	-	K	K	K	K	K	K	K	K	K	K	K	K	K	K	K	K	K	K	K	K	K	K	K	K	K	K	K	K	K	K	K	K	K	K	K	W	K	K	K	K	K	K	K	K	K
BOPA1_6589-1211	4H	35.9065	4H	38.79	K	K	K	K	K	K	K	K	K	K	K	K	K	K	K	K	K	K	K	K	K	K	K	K	K	K	K	K	K	K	K	K	K	K	K	W	W	W	W	W	W	K	K	K	K
SCRI_RS_209362	4H	35.9065	4H	38.79	K	K	K	K	K	K	K	K	K	K	K	K	K	K	K	K	K	K	K	K	K	K	K	K	K	K	K	K	K	K	K	K	K	K	K	W	W	W	W	W	W	K	K	K	K
SCRI_RS_179489	4H	37.8187	4H	40.69	K	K	K	K	K	K	K	K	K	K	K	K	K	K	K	K	K	K	K	K	K	K	K	K	K	K	K	K	K	K	K	K	K	K	K	W	W	W	W	W	W	K	K	K	K
SCRI_RS_6956	4H	40.0142	4H	42.89	K	K	K	K	K	K	K	K	K	K	K	K	K	K	K	K	K	K	K	K	K	K	K	K	K	K	K	K	K	K	K	K	K	K	K	W	W	W	W	W	W	W	K	K	K
SCRI_RS_145412	4H	40.0142	4H	42.89	K	K	K	K	K	K	K	K	K	K	K	K	K	K	K	K	K	K	K	K	K	K	K	K	K	K	K	K	K	K	K	K	K	K	K	W	W	W	W	W	W	W	K	K	K
SCRI_RS_75805	4H	41.8555	4H	44.79	K	K	K	K	K	K	K	K	K	K	K	K	K	K	K	K	K	K	K	K	K	K	K	K	K	K	K	K	K	K	K	K	K	K	K	K	W	W	W	W	W	W	K	K	K
SCRI_RS_183399	4H	42.068	4H	44.99	K	K	K	K	K	K	K	K	K	K	K	K	K	K	K	K	K	K	K	K	K	K	K	K	K	K	K	K	K	K	K	K	K	K	K	K	W	W	W	W	W	W	K	K	K
SCRI_RS_116338	4H	43.272	4H	46.37	K	K	K	K	K	K	K	K	K	K	K	K	K	K	K	K	K	K	K	K	K	K	K	K	K	K	K	K	K	K	K	K	K	K	K	K	W	W	W	W	W	W	W	K	K
SCRI_RS_220122	4H	43.4844	4H	46.57	K	K	K	K	K	K	K	K	K	K	K	K	K	K	K	K	K	K	K	K	K	K	K	K	K	K	K	K	K	K	K	K	K	K	K	K	W	W	W	W	W	W	W	K	K
BOPA1_1180-70	4H	45.6799	4H	48.26	K	K	K	K	K	K	K	K	K	W	K	K	K	K	K	K	K	K	K	K	K	K	K	K	K	K	K	K	K	K	K	K	K	K	K	K	W	W	W	W	W	W	W	W	K
SCRI_RS_167844	4H	48.6544	4H	51.77	K	K	K	K	K	K	K	K	K	W	K	K	K	K	K	K	K	K	K	K	K	K	K	K	K	K	K	K	K	K	K	K	K	K	K	K	W	W	W	W	W	W	W	W	K
BOPA2_12_30993	4H	48.6544	4H	51.69	K	K	K	K	K	K	K	K	K	W	K	K	K	K	K	K	K	K	K	K	K	K	K	K	K	K	K	K	K	K	K	K	K	K	K	K	W	W	W	W	W	W	W	W	K
SCRI_RS_199711	4H	49.7167	-	-	K	K	K	K	K	K	K	K	K	K	K	K	K	K	K	K	K	K	K	K	K	K	K	K	K	K	K	K	K	K	K	K	K	K	K	K	W	W	W	W	W	W	W	W	K
SCRI_RS_143088	4H	49.7167	-	-	K	K	K	K	K	K	K	K	K	K	K	K	K	K	K	K	K	K	K	K	K	K	K	K	K	K	K	K	K	K	K	K	K	K	K	K	W	W	W	W	W	W	W	W	K
SCRI_RS_133407	4H	49.7167	-	-	K	K	K	K	K	K	K	K	K	K	K	K	K	K	K	K	K	K	K	K	K	K	K	K	K	K	K	K	K	K	K	K	K	K	K	K	W	W	W	W	W	W	W	W	K
BOPA1_ABC24906-1-1-279	4H	49.8584	4H	52.97	K	K	K	K	K	K	K	K	K	K	K	K	K	K	K	K	K	K	K	K	K	K	K	K	K	K	K	K	K	K	K	K	K	K	K	K	W	W	W	W	W	W	W	W	K
SCRI_RS_222133	4H	49.8584	4H	52.97	K	K	K	K	K	K	K	K	K	K	K	K	K	K	K	K	K	K	K	K	K	K	K	K	K	K	K	K	K	K	K	K	K	K	K	K	W	W	W	W	W	W	W	W	K
BOPA1_4544-461	4H	49.8584	4H	52.67	K	K	K	K	K	K	K	K	K	W	K	K	K	K	K	K	K	K	K	K	K	K	K	K	K	K	K	K	K	K	K	K	K	K	K	K	W	W	W	W	W	W	W	W	K
SCRI_RS_130433	4H	49.8584	-	-	K	K	K	K	K	K	K	K	K	K	K	K	K	K	K	K	K	K	K	K	K	K	K	K	K	K	K	K	K	K	K	K	K	K	K	K	W	W	W	W	W	W	W	W	K
SCRI_RS_144322	4H	49.8584	-	-	K	K	K	K	K	K	K	K	K	W	K	K	K	K	K	K	K	K	K	K	K	K	K	K	K	K	K	K	K	K	K	K	K	K	K	K	W	W	W	W	W	W	W	W	K
SCRI_RS_233908	4H	49.8584	-	-	K	K	K	K	K	K	K	K	K	K	K	K	K	K	K	K	K	K	K	K	K	K	K	K	K	K	K	K	K	K	K	K	K	K	K	K	W	W	W	W	W	W	W	W	K
SCRI_RS_62855	4H	49.8584	-	-	K	K	K	K	K	K	K	K	K	K	K	K	K	K	K	K	K	K	K	K	K	K	K	K	K	K	K	K	K	K	K	K	K	M	K	K	W	W	M	M	M	M	W	W	K
SCRI_RS_203147	4H	49.8584	-	-	K	K	K	K	K	K	K	K	K	K	K	K	K	K	K	K	K	K	K	K	K	K	K	K	K	K	K	K	K	K	K	K	K	K	K	K	W	W	W	W	W	W	W	W	K
SCRI_RS_157072	4H	50.7082	4H	53.77	K	K	K	K	K	K	K	K	K	K	K	K	K	K	K	K	K	K	K	K	K	K	K	K	K	K	K	K	K	K	K	K	K	K	K	K	K	W	W	W	W	H	K	W	K
SCRI_RS_177312	4H	50.7082	4H	53.77	K	K	K	K	K	K	K	K	K	K	K	K	K	K	K	K	K	K	K	K	K	K	K	K	K	K	K	K	K	K	K	K	K	K	K	K	K	W	W	W	W	H	K	W	K
BOPA1_3190-644	4H	50.8499	4H	53.87	K	K	K	K	K	K	K	K	K	K	K	K	K	K	K	K	K	K	K	K	K	K	K	K	K	K	K	K	K	K	K	K	K	K	K	K	K	W	W	W	W	H	K	W	K
SCRI_RS_1396	4H	50.8499	4H	53.77	K	K	K	K	K	K	K	K	K	K	K	K	K	K	K	K	K	K	K	K	K	K	K	K	K	K	K	K	K	K	K	K	K	K	K	K	K	W	W	W	W	H	K	W	K
SCRI_RS_217322	4H	50.8499	4H	53.77	K	K	K	K	K	K	K	K	K	K	K	K	K	K	K	K	K	K	K	K	K	K	K	K	K	K	K	K	K	K	K	K	K	K	K	K	K	W	W	W	W	H	K	W	K
SCRI_RS_229704	4H	50.8499	4H	53.77	K	K	K	K	K	K	K	K	M	K	K	K	K	K	K	K	K	K	K	K	K	K	K	K	K	K	K	K	K	K	K	K	K	K	K	K	K	W	W	W	W	H	K	W	K
SCRI_RS_205863	4H	50.8499	4H	53.77	K	K	K	K	K	K	K	K	K	K	K	K	K	K	K	K	K	K	K	K	K	K	K	K	K	K	K	K	K	K	K	K	K	K	K	K	K	W	W	W	W	H	K	W	K
SCRI_RS_219128	4H	50.8499	4H	53.77	K	K	K	K	K	K	K	K	K	K	K	K	K	K	K	K	K	K	K	K	K	K	K	K	K	K	K	K	K	K	K	K	K	K	K	K	K	W	W	W	W	H	K	W	K
BOPA1_4636-1380	4H	50.9915	4H	53.87	K	K	K	K	K	K	K	K	K	K	K	K	K	K	K	K	K	K	K	K	K	K	K	K	K	K	K	K	K	K	K	K	K	K	K	K	K	W	W	W	W	H	K	W	K
BOPA1_6215-539	4H	50.9915	4H	53.87	K	K	K	K	K	K	K	K	K	K	K	K	K	K	K	K	K	K	K	K	K	K	K	K	K	K	K	K	K	K	K	K	K	K	K	K	K	W	W	W	W	H	K	W	K
SCRI_RS_145311	4H	50.9915	4H	53.87	K	K	K	K	K	K	K	K	K	K	K	K	K	K	K	K	K	K	K	K	K	K	K	K	K	K	K	M	K	K	K	K	K	K	K	K	K	K	K	K	K	K	K	K	K
SCRI_RS_148289	4H	50.9915	4H	53.87	K	K	K	K	K	K	K	K	K	K	K	K	K	K	K	K	K	K	K	K	K	K	K	K	K	K	K	K	K	K	K	K	K	K	K	K	K	W	W	W	W	H	K	W	K
SCRI_RS_175365	4H	50.9915	4H	53.87	K	K	K	K	K	K	K	K	K	K	K	K	K	K	K	K	K	K	K	K	K	K	K	K	K	K	K	K	K	K	K	K	K	K	K	K	K	W	W	W	W	H	K	W	K
SCRI_RS_157666	4H	50.9915	4H	53.87	K	K	K	K	K	K	K	K	K	K	K	K	K	K	K	K	K	K	K	K	K	K	K	K	K	K	K	K	K	K	K	K	K	K	K	K	K	W	W	W	W	H	K	W	K
SCRI_RS_226221	4H	50.9915	4H	53.87	K	K	K	K	K	K	K	K	K	K	K	K	K	K	K	K	K	K	K	K	K	K	K	K	K	K	K	K	K	K	K	K	K	K	K	K	K	W	W	W	W	M	K	W	K
SCRI_RS_239818	4H	50.9915	4H	53.87	K	K	K	K	K	K	K	K	K	K	K	K	K	K	K	K	K	K	K	K	K	K	K	K	K	K	K	K	K	K	K	K	K	K	K	K	K	W	W	W	W	H	K	W	K
BOPA1_788-842	4H	50.9915	4H	53.87	K	K	K	K	K	K	K	K	K	K	K	K	K	K	K	K	K	K	K	K	K	K	K	K	K	K	K	K	K	K	K	K	K	K	K	K	K	W	W	W	W	K	K	W	K
BOPA2_12_31310	4H	50.9915	-	-	K	K	K	K	K	K	K	K	K	K	K	K	K	K	K	K	K	K	K	K	K	K	K	K	K	K	K	K	K	K	K	K	K	K	K	K	K	K	K	K	K	K	K	K	K
SCRI_RS_204804	4H	50.9915	-	-	K	K	K	K	K	K	K	K	K	K	K	K	K	K	K	K	K	K	K	K	K	K	K	K	K	K	K	K	K	K	K	K	K	K	K	K	K	K	K	K	K	K	K	K	K
SCRI_RS_197371	4H	50.9915	-	-	K	K	K	K	K	K	K	K	K	K	K	K	K	K	K	K	K	K	K	K	K	K	K	K	K	K	K	K	K	K	K	K	K	K	K	K	K	K	K	K	K	K	K	K	K
SCRI_RS_239781	4H	50.9915	-	-	K	K	K	K	K	K	K	K	K	K	K	K	K	K	K	K	K	K	K	K	K	K	K	K	K	K	K	K	K	K	K	K	K	K	K	K	K	K	K	K	K	K	K	K	K
SCRI_RS_204773	4H	50.9915	-	-	K	K	K	K	K	K	K	K	K	K	K	K	K	K	K	K	K	K	K	K	K	K	K	K	K	K	K	K	K	K	K	K	K	K	K	K	K	K	K	K	K	K	K	K	K
SCRI_RS_101389	4H	51.1331	4H	53.87	K	K	K	K	K	K	K	K	K	K	K	K	K	K	K	K	K	K	K	K	K	K	K	K	K	K	K	K	K	K	K	K	K	K	K	K	K	W	W	W	W	K	K	W	K
SCRI_RS_92128	4H	51.2748	4H	53.87	K	K	K	K	K	K	K	K	K	K	K	K	K	K	K	K	K	K	K	K	K	K	K	K	K	K	K	K	K	K	K	K	K	K	K	K	K	K	K	K	K	K	K	K	K
SCRI_RS_200010	4H	51.2748	4H	53.87	K	K	K	K	K	K	K	K	K	K	K	K	K	K	K	K	K	K	K	K	K	K	K	K	K	K	K	K	K	K	K	K	K	K	K	K	K	W	W	W	W	K	K	W	K
SCRI_RS_10216	4H	51.4164	4H	53.87	K	K	K	K	K	K	K	K	K	K	K	K	K	K	K	K	K	K	K	K	K	K	K	K	K	K	K	K	K	K	K	K	K	K	K	K	K	W	W	W	W	K	K	W	K
SCRI_RS_194316	4H	51.4164	4H	53.87	K	K	K	K	K	K	K	K	K	K	K	K	K	K	K	K	K	K	K	K	K	K	K	K	K	K	K	K	K	K	K	K	K	K	K	K	K	K	K	K	K	K	K	K	K
BOPA2_12_31414	4H	51.4164	-	-	K	K	K	K	K	K	K	K	K	K	K	K	K	K	K	K	K	K	K	K	K	K	K	K	K	K	K	K	K	K	K	K	K	K	K	K	W	W	W	W	W	W	W	W	K
SCRI_RS_207936	4H	51.4164	-	-	K	K	K	K	K	K	K	K	K	W	K	K	K	K	K	K	K	K	K	K	K	K	K	K	K	K	K	K	K	K	K	K	K	K	K	K	W	W	W	W	W	W	W	W	K
SCRI_RS_110052	4H	51.4164	-	-	K	K	K	K	K	K	K	K	K	K	K	K	K	K	K	K	K	K	K	K	K	K	K	K	K	K	K	K	K	K	K	K	K	K	K	K	W	W	W	W	W	W	W	W	K
BOPA2_12_30684	4H	51.9122	4H	53.87	K	K	K	K	K	K	K	K	K	K	K	K	K	K	K	K	K	K	K	K	K	K	K	K	K	K	K	K	K	K	H	K	K	K	K	K	K	W	W	W	W	K	K	W	W
SCRI_RS_171142	4H	51.9122	4H	53.87	K	K	K	K	K	K	K	K	K	K	K	K	K	K	K	K	K	K	K	K	K	K	K	K	K	K	K	K	K	K	K	K	K	K	K	K	K	M	M	M	M	K	K	M	M
SCRI_RS_231739	4H	52.1955	4H	53.87	K	K	K	K	K	K	K	K	K	K	K	K	K	K	K	K	K	K	K	K	K	K	K	K	K	K	K	K	K	K	W	K	K	K	K	K	K	W	W	W	W	K	K	W	W
BOPA1_3193-671	4H	52.1955	4H	53.87	K	K	K	K	K	K	K	K	K	K	K	K	K	K	K	K	K	K	K	K	K	K	K	K	K	K	K	K	K	K	K	K	K	K	K	K	K	K	K	K	K	K	K	K	K
SCRI_RS_150603	4H	52.3371	4H	53.87	K	K	K	K	K	K	K	K	K	K	K	K	K	K	K	K	K	K	K	K	K	K	K	K	K	K	K	K	K	K	W	K	K	K	K	K	K	W	W	W	W	K	K	W	W
SCRI_RS_194649	4H	52.3371	4H	53.87	K	K	K	K	K	K	K	K	K	K	K	K	K	K	K	K	K	K	K	K	K	K	K	K	K	K	K	K	K	K	W	K	K	K	K	K	K	W	W	W	W	K	K	W	W
SCRI_RS_157396	4H	52.3371	4H	53.87	K	K	K	K	K	K	K	K	K	K	K	K	K	K	K	K	K	K	K	K	K	K	K	K	K	K	K	K	K	K	W	K	K	K	K	K	K	W	W	W	W	K	K	W	W
BOPA1_7942-948	4H	52.4788	4H	53.87	K	K	K	K	K	K	K	K	K	K	K	K	K	K	K	K	K	K	K	K	K	K	K	K	K	K	K	K	K	K	W	K	K	K	K	K	K	W	W	W	W	K	K	W	W
SCRI_RS_170494	4H	52.4788	4H	53.87	K	K	K	K	K	K	K	K	K	K	K	K	K	K	K	K	K	K	K	K	K	K	K	K	K	K	K	K	K	K	W	K	K	K	K	K	K	W	W	W	W	K	K	W	W
BOPA2_12_30427	4H	52.6912	4H	54.03	K	K	K	K	K	K	K	K	K	K	K	K	K	K	K	K	K	K	K	K	K	K	K	K	K	K	K	K	K	K	W	K	K	K	K	K	K	W	W	W	W	K	K	W	W
SCRI_RS_128723	4H	54.0368	4H	54.66	K	K	K	K	K	K	K	K	K	K	K	K	K	K	K	K	K	K	K	K	K	K	K	K	K	K	K	K	K	K	K	K	K	K	K	K	K	W	W	W	W	K	K	W	W
SCRI_RS_208828	4H	54.0368	4H	54.66	K	K	K	K	K	K	K	K	K	K	K	K	K	K	K	K	K	K	K	K	K	K	K	K	K	K	K	K	K	K	K	K	K	K	K	K	K	W	W	W	W	K	K	W	W
SCRI_RS_155554	4H	54.0368	4H	54.66	K	K	K	K	K	K	K	K	K	K	K	K	K	K	K	K	K	K	K	K	K	K	K	K	K	K	K	K	K	K	K	K	K	K	K	K	K	W	W	W	W	K	K	W	W
SCRI_RS_221172	4H	54.0368	4H	54.66	K	K	K	K	K	K	K	K	K	K	K	K	K	K	K	K	K	K	K	K	K	K	K	K	K	K	K	K	K	K	K	K	K	K	K	K	K	W	W	W	W	K	K	W	W
BOPA1_1169-944	4H	54.0368	4H	54.56	K	K	K	K	K	K	K	K	K	K	K	K	K	K	K	K	K	K	K	K	K	K	K	K	K	K	K	K	K	K	K	K	K	K	K	K	K	W	W	W	W	K	K	W	W
BOPA1_3917-1365	4H	54.0368	4H	54.95	K	K	K	K	K	K	K	K	K	K	K	K	K	K	K	K	K	K	K	K	K	K	K	K	K	K	K	K	K	K	K	K	K	K	K	K	K	W	W	W	W	K	K	W	W
BOPA1_ABC01247-1-1-92	4H	54.0368	4H	53.87	K	K	K	K	K	K	K	K	K	K	K	K	K	K	K	K	K	K	K	K	K	K	K	K	K	K	K	K	K	K	K	K	K	K	K	K	K	W	W	W	W	K	K	W	K
BOPA1_ABC05369-1-3-231	4H	54.0368	4H	54.56	K	K	K	K	K	K	K	K	K	K	K	K	K	K	K	K	K	K	K	K	K	K	K	K	K	K	K	K	K	K	H	K	K	K	K	K	K	W	W	W	W	K	K	W	W
BOPA1_ABC14026-1-2-168	4H	54.0368	4H	53.87	K	K	K	K	K	K	K	K	K	K	K	K	K	K	K	K	K	K	K	K	K	K	K	K	K	K	K	K	K	K	K	K	K	K	K	K	K	W	W	W	W	K	K	W	K
BOPA2_12_31462	4H	54.3201	4H	54.95	K	K	K	K	K	K	K	K	K	K	K	K	K	K	K	K	K	K	K	K	K	K	K	K	K	K	K	K	K	K	K	K	K	K	K	K	K	W	M	W	W	K	K	W	W
BOPA1_10346-92	4H	54.3201	4H	54.95	K	K	K	K	K	K	K	K	K	K	K	K	K	K	K	K	K	K	K	K	K	K	K	K	K	K	K	K	K	K	K	K	K	K	K	K	K	W	H	W	W	K	K	W	W
BOPA1_2274-1226	4H	54.3201	4H	54.95	K	K	K	K	K	K	K	K	K	K	K	K	K	K	K	K	K	K	K	K	K	K	K	K	K	K	K	K	K	K	K	K	K	K	K	K	K	W	H	W	W	K	K	W	W
BOPA1_2776-637	4H	54.3201	4H	54.95	K	K	K	K	K	K	K	K	K	K	K	K	K	K	K	K	K	K	K	K	K	K	K	K	K	K	K	K	K	K	K	K	K	K	K	K	K	W	M	W	W	K	K	W	W
SCRI_RS_147636	4H	54.3201	-	-	K	K	K	K	K	K	K	K	K	K	K	K	K	K	K	K	K	K	K	K	K	K	K	K	K	K	K	K	K	K	K	K	K	K	K	K	K	W	M	W	W	K	K	W	W
SCRI_RS_208732	4H	54.3201	-	-	K	K	K	K	K	K	K	K	K	K	K	K	K	K	K	K	K	K	K	K	K	K	K	K	K	K	K	K	K	K	K	K	K	K	K	K	K	W	H	W	W	K	K	W	W
BOPA1_3716-910	4H	54.4618	4H	54.95	K	K	K	K	K	K	K	K	K	K	K	K	K	K	K	K	K	K	K	K	K	K	K	K	K	K	K	K	K	K	K	K	K	K	K	K	K	W	H	W	W	K	K	W	W
SCRI_RS_228477	4H	54.6034	4H	54.95	K	K	K	K	K	K	K	K	K	K	K	K	K	K	K	K	K	K	K	K	K	K	K	K	K	K	K	K	K	K	K	K	K	K	K	K	K	W	M	W	W	K	K	W	W
SCRI_RS_168496	4H	54.6034	4H	54.95	K	K	K	K	K	K	K	K	K	K	K	K	K	K	K	K	K	K	K	K	K	K	K	K	K	K	K	K	K	K	K	K	K	K	K	K	K	W	H	W	W	K	K	W	W
SCRI_RS_195935	4H	55.7365	4H	55.59	K	K	K	K	K	K	K	K	K	K	K	K	K	K	K	K	K	K	K	K	K	K	K	K	K	K	K	K	K	K	K	K	K	K	K	K	K	K	H	W	H	K	K	W	H
SCRI_RS_150615	4H	56.1615	4H	55.59	K	K	K	K	K	K	K	K	K	K	K	K	K	K	K	K	K	K	K	K	K	K	K	K	K	K	K	K	K	K	K	K	K	K	K	K	K	K	H	W	H	K	K	W	M
SCRI_RS_224629	4H	56.1615	4H	55.59	K	K	K	K	K	K	K	K	K	K	K	K	K	K	K	K	K	K	K	K	K	K	K	K	K	K	K	K	K	K	K	K	K	K	K	K	K	K	H	W	H	K	K	W	H
SCRI_RS_168603	4H	56.1615	4H	55.59	K	K	K	K	K	K	K	K	K	K	K	K	K	K	K	K	K	K	K	K	K	K	K	K	K	K	K	K	K	K	K	K	K	K	K	K	K	K	H	W	H	K	K	W	M
SCRI_RS_182555	4H	56.2323	4H	55.59	K	K	K	K	K	K	K	K	K	K	K	K	K	K	K	K	K	K	K	K	K	K	K	K	K	K	K	K	K	K	K	K	K	K	K	K	K	K	M	W	M	K	K	W	M
SCRI_RS_13552	4H	56.2323	4H	55.59	K	K	K	K	K	K	K	K	K	K	K	K	K	K	K	K	K	K	K	K	K	K	K	K	K	K	K	K	K	K	K	K	K	K	K	K	K	K	M	W	H	K	K	W	M
SCRI_RS_164698	4H	56.2323	4H	55.59	K	K	K	K	K	K	K	K	K	K	K	K	K	K	K	K	K	K	K	K	K	K	K	K	K	K	K	K	K	K	K	K	K	K	K	K	K	K	M	W	M	K	K	W	W
BOPA1_482-1423	4H	57.2946	4H	57.38	K	K	K	K	K	K	K	K	K	K	K	K	K	K	K	K	K	K	K	K	K	K	K	K	K	K	K	K	K	K	K	K	K	K	K	K	K	K	K	W	H	K	K	W	M
SCRI_RS_98343	4H	57.2946	-	-	K	K	K	K	K	K	K	K	K	K	K	K	K	K	K	K	K	K	K	K	K	K	K	K	K	K	K	K	K	K	K	K	K	K	K	K	K	K	K	W	H	K	K	W	M
BOPA2_12_31186	4H	57.5071	4H	56.72	K	K	K	K	K	K	K	K	K	K	K	K	K	K	K	K	K	K	K	K	K	K	K	K	K	K	K	K	K	K	K	K	K	K	K	K	K	K	H	W	H	K	K	W	H
SCRI_RS_189180	4H	58.0737	4H	57.32	K	K	K	K	K	K	K	K	K	K	K	K	K	K	K	K	K	K	K	K	K	K	K	K	K	K	K	K	K	K	K	K	K	K	K	K	K	K	K	W	H	K	K	W	H
SCRI_RS_166159	4H	59.4901	4H	58.72	K	K	K	K	K	K	K	K	K	K	K	K	K	K	K	K	K	K	K	K	K	K	K	K	K	K	K	K	K	K	K	K	K	K	K	K	K	K	K	W	H	K	K	W	W
BOPA1_4336-2579	4H	59.6317	4H	58.82	K	K	K	K	K	K	K	K	K	K	K	K	K	K	K	K	K	K	K	K	K	K	K	K	K	K	K	K	K	K	K	K	K	K	K	K	K	K	K	W	H	K	K	W	W
SCRI_RS_163440	4H	59.6317	4H	58.82	K	K	K	K	K	K	K	K	K	K	K	K	K	K	K	K	K	K	K	K	K	K	K	K	K	K	K	K	K	K	K	K	K	K	K	K	K	K	K	W	H	K	K	W	W
SCRI_RS_138684	4H	59.6317	4H	58.82	K	K	K	K	K	K	K	K	K	K	K	K	K	K	K	K	K	K	K	K	K	K	K	K	K	K	K	K	K	K	K	K	K	K	K	K	K	K	K	W	H	K	K	W	W
SCRI_RS_196044	4H	59.6317	4H	58.82	K	K	K	K	K	K	K	K	K	K	K	K	K	K	K	K	K	K	K	K	K	K	K	K	K	K	K	K	K	K	K	K	K	K	K	K	K	K	K	W	H	K	K	W	W
BOPA1_1110-715	4H	59.6317	4H	57.44	K	K	K	K	K	K	K	K	K	K	K	K	K	K	K	K	K	K	K	K	K	K	K	K	K	K	K	K	K	K	K	K	K	K	K	K	K	K	K	W	H	K	K	W	H
SCRI_RS_134953	4H	59.6317	-	-	K	K	K	K	K	K	K	K	K	K	K	K	K	K	K	K	K	K	K	K	K	K	K	K	K	K	K	K	K	K	K	K	K	K	K	K	K	K	K	W	H	K	K	W	W
SCRI_RS_206537	4H	59.6317	-	-	K	K	K	K	K	K	K	K	K	K	K	K	K	K	K	K	K	K	K	K	K	K	K	K	K	K	K	K	K	K	K	K	K	K	K	K	K	K	K	W	H	K	K	W	H
SCRI_RS_166457	4H	59.6317	-	-	K	K	K	K	K	K	K	K	K	K	K	K	K	K	K	K	K	K	K	K	K	K	K	K	K	K	K	K	K	K	K	K	K	K	K	K	K	K	K	W	H	K	K	W	M
SCRI_RS_13921	4H	59.6317	-	-	K	K	K	K	K	K	K	K	K	K	K	K	K	K	K	K	K	K	K	K	K	K	K	K	K	K	K	K	K	K	K	K	K	K	K	K	K	K	K	W	H	K	K	W	H
BOPA1_ConsensusGBS0010-2	4H	59.7734	4H	58.82	K	K	K	K	K	K	K	K	K	K	K	K	K	K	K	K	K	K	K	K	K	K	K	K	K	K	K	K	K	K	K	K	K	K	K	K	K	K	K	W	H	K	K	W	W
SCRI_RS_234574	4H	59.7734	4H	59.02	K	K	K	K	K	K	K	K	K	K	K	K	K	K	K	K	K	K	K	K	K	K	K	K	K	K	K	K	K	K	K	K	K	K	K	K	K	K	K	W	M	K	K	W	W
BOPA2_12_30620	4H	60.1275	4H	59.32	K	K	K	K	K	K	K	K	K	K	K	K	K	K	K	K	K	K	K	K	K	K	K	K	K	K	K	K	K	K	K	K	K	K	K	K	K	K	K	W	W	K	K	W	W
SCRI_RS_225248	4H	60.1275	4H	59.32	K	K	K	K	K	K	K	K	K	K	K	K	K	K	K	K	K	K	K	K	K	K	K	K	K	K	K	K	K	K	K	K	K	K	K	K	K	K	K	W	W	K	K	W	W
SCRI_RS_218193	4H	60.1275	4H	59.32	K	K	K	K	K	K	K	K	K	K	K	K	K	K	K	K	K	K	K	K	K	K	K	K	K	K	K	K	K	K	K	K	K	K	K	K	K	K	K	W	W	K	K	W	W
SCRI_RS_206179	4H	60.1275	4H	59.32	K	K	K	K	K	K	K	K	K	K	K	K	K	K	K	K	K	K	K	K	K	K	K	K	K	K	K	K	K	K	K	K	K	K	K	K	K	K	K	W	W	K	K	W	W
BOPA2_12_30904	4H	60.5524	4H	60.64	K	K	K	K	K	K	K	K	K	K	K	K	K	K	K	K	K	K	K	K	K	K	K	K	K	K	K	K	K	K	K	K	K	K	K	K	K	K	K	W	W	K	K	K	W
SCRI_RS_185497	4H	60.5524	-	-	K	K	K	K	K	K	K	K	K	K	K	K	K	K	K	K	K	K	K	K	K	K	K	K	K	K	K	K	K	K	K	K	K	K	K	K	K	K	K	W	W	K	K	K	W
SCRI_RS_206361	4H	60.5524	-	-	K	K	K	K	K	K	K	K	K	K	K	K	K	K	K	K	K	K	K	K	K	K	K	K	K	K	K	K	K	K	K	K	K	K	K	K	K	K	K	W	W	K	K	K	W
BOPA1_10321-364	4H	60.6941	4H	60.18	K	K	K	K	K	K	K	K	K	K	K	K	K	K	K	K	K	K	K	K	K	K	K	K	K	K	K	K	K	K	K	K	K	K	K	K	K	K	K	W	W	K	K	K	W
BOPA2_12_30905	4H	60.6941	4H	60.64	K	K	K	K	K	K	K	K	K	K	K	K	K	K	K	K	K	K	K	K	K	K	K	K	K	K	K	K	K	K	K	K	K	K	K	K	K	K	K	W	W	K	K	K	W
SCRI_RS_10205	4H	60.6941	-	-	K	K	K	K	K	K	K	K	K	K	K	K	K	K	K	K	K	K	K	K	K	K	K	K	K	K	K	K	K	K	K	K	K	K	K	K	K	K	K	W	W	K	K	W	W
SCRI_RS_144194	4H	60.6941	-	-	K	K	K	K	K	K	K	K	K	K	K	K	K	K	K	K	K	K	K	K	K	K	K	K	K	K	K	K	K	K	K	K	K	K	K	K	K	K	K	W	W	K	K	K	W
SCRI_RS_151068	4H	60.6941	-	-	K	K	K	K	K	K	K	K	K	K	K	K	K	K	K	K	K	K	K	K	K	K	K	K	K	K	K	K	K	K	K	K	K	K	K	K	K	K	K	W	W	K	K	K	W
SCRI_RS_13644	4H	60.6941	-	-	K	K	K	K	K	K	K	K	K	K	K	K	K	K	K	K	K	K	K	K	K	K	K	K	K	K	K	K	K	K	K	K	K	K	K	K	K	K	K	W	W	K	K	K	W
BOPA1_4139-888	4H	60.8357	4H	60.28	K	K	K	K	K	K	K	K	K	K	K	K	K	K	K	K	K	K	K	K	K	K	K	K	K	K	K	K	K	K	K	K	K	K	K	K	K	K	K	W	W	K	K	W	W
BOPA2_12_31385	4H	60.8357	4H	60.64	K	K	K	K	K	K	K	K	K	K	K	K	K	K	K	K	K	K	K	K	K	K	K	K	K	K	K	K	K	K	K	K	K	K	K	K	K	K	K	W	W	K	K	W	W
SCRI_RS_151213	4H	61.4023	4H	60.62	K	K	K	K	K	K	K	K	K	K	K	K	K	K	K	K	K	K	K	K	K	K	K	K	K	K	K	K	K	K	K	K	K	K	K	K	K	K	K	W	W	K	K	W	W
SCRI_RS_213542	4H	61.4023	-	-	K	K	K	K	K	K	K	K	K	K	K	K	K	K	K	K	K	K	K	K	K	K	K	K	K	K	K	K	K	K	K	K	K	K	K	K	K	K	K	W	W	K	K	W	W
BOPA1_ABC09432-1-1-160	4H	61.5439	4H	60.72	K	K	K	K	K	K	K	K	K	K	K	K	K	K	K	K	K	K	K	K	K	K	K	K	K	K	K	K	K	K	K	K	K	K	K	K	K	K	K	W	W	K	K	W	W
SCRI_RS_8100	4H	61.5439	4H	60.72	K	K	K	K	K	K	K	K	K	K	K	K	K	K	K	K	K	K	K	K	K	K	K	K	K	K	K	K	K	K	K	K	K	K	K	K	K	K	K	W	W	K	K	W	W
SCRI_RS_146941	4H	61.8272	4H	61.02	K	K	K	K	K	K	K	K	K	K	K	K	K	K	K	K	K	K	K	K	K	K	K	K	K	K	K	K	K	K	K	K	K	K	K	K	K	K	K	W	W	K	K	W	W
SCRI_RS_140349	4H	62.5354	4H	61.72	K	K	K	K	K	K	K	K	K	K	K	K	K	K	K	K	K	K	K	K	K	K	K	K	K	K	K	K	K	K	K	K	K	K	K	K	K	K	K	W	W	K	K	W	W
SCRI_RS_215737	4H	63.2436	4H	62.42	K	K	K	K	K	K	K	K	K	K	K	K	K	K	K	K	K	K	K	K	K	K	K	K	K	K	K	K	K	K	K	K	K	K	K	K	K	K	K	W	W	K	K	W	W
SCRI_RS_139806	4H	63.3853	4H	62.62	K	K	K	K	K	K	K	K	K	K	K	K	K	K	K	K	K	K	K	K	K	K	K	K	K	K	K	K	K	K	K	K	K	K	K	K	K	K	K	W	W	K	K	W	W
SCRI_RS_147772	4H	63.3853	4H	62.62	K	K	K	K	K	K	K	K	K	K	K	K	K	K	K	K	K	K	K	K	K	K	K	K	K	K	K	K	K	K	K	K	K	K	K	K	K	K	K	W	W	K	K	W	W
BOPA1_11293-490	4H	63.3853	4H	62.96	K	K	K	K	K	K	K	K	K	K	K	K	K	K	K	K	K	K	K	K	K	K	K	K	K	K	K	K	K	K	K	K	K	K	K	K	K	K	K	W	W	K	K	W	W
BOPA1_424-423	4H	63.6686	4H	62.92	K	K	K	K	K	K	K	K	K	K	K	K	K	K	K	K	K	K	K	K	K	K	K	K	K	K	K	K	K	K	K	K	K	K	K	K	K	K	K	W	W	K	K	W	W
BOPA2_12_31536	4H	63.6686	4H	62.92	K	K	K	K	K	K	K	K	K	K	K	K	K	K	K	K	K	K	K	K	K	K	K	K	K	K	K	K	K	K	K	K	K	K	K	K	K	K	K	W	W	K	K	W	W
BOPA1_2955-452	4H	63.9518	4H	62.92	K	K	K	K	K	K	K	K	K	K	K	K	K	K	K	K	K	K	K	K	K	K	K	K	K	K	K	K	K	K	K	K	K	K	K	K	K	K	K	W	W	K	K	W	W
BOPA1_3549-743	4H	63.9518	4H	62.92	K	K	K	K	K	K	K	K	K	K	K	K	K	K	K	K	K	K	K	K	K	K	K	K	K	K	K	K	K	K	K	K	K	K	K	K	K	K	K	W	W	K	K	W	W
BOPA2_12_30693	4H	63.9518	4H	62.92	K	K	K	K	K	K	K	K	K	K	K	K	K	K	K	K	K	K	K	K	K	K	K	K	K	K	K	K	K	K	K	K	K	K	K	K	K	K	K	W	W	K	K	W	W
SCRI_RS_154704	4H	63.9518	-	-	K	K	K	K	K	K	K	K	K	K	K	K	K	K	K	K	K	K	K	K	K	K	K	K	K	K	K	K	K	K	K	K	K	K	K	K	K	K	K	W	W	K	K	W	W
SCRI_RS_148392	4H	67.5637	4H	65.52	K	K	K	K	K	K	K	K	K	K	K	K	K	K	K	K	K	K	K	K	K	K	K	K	K	K	K	K	K	K	K	K	K	K	K	K	K	K	K	W	W	K	K	W	W
SCRI_RS_157650	4H	67.5637	4H	65.52	K	K	K	K	K	K	K	K	K	K	K	K	K	K	K	K	K	K	K	K	K	K	K	K	K	K	K	K	K	K	K	K	K	K	K	K	K	K	K	W	W	K	K	W	W
SCRI_RS_239956	4H	67.5637	4H	65.52	K	K	K	K	K	K	K	K	K	K	K	K	K	K	K	K	K	K	K	K	K	K	K	K	K	K	K	K	K	K	K	K	K	K	K	K	K	K	K	W	W	K	K	W	W
BOPA1_4407-1344	4H	67.5637	4H	64.45	K	K	K	K	K	K	K	K	K	K	K	K	K	K	K	K	K	K	K	K	K	K	K	K	K	K	K	K	K	K	K	K	K	K	K	K	K	K	K	W	W	K	K	W	W
BOPA1_6172-773	4H	67.5637	4H	67.22	K	K	K	K	K	K	K	K	K	K	K	K	K	K	K	K	K	K	K	K	K	K	K	K	K	K	K	K	K	K	K	K	K	K	K	K	K	K	K	W	K	K	K	W	W
SCRI_RS_237913	4H	67.5637	-	-	K	K	K	K	K	K	K	K	K	K	K	K	K	K	K	K	K	K	K	K	K	K	K	K	K	K	K	K	K	K	K	K	K	K	K	K	K	K	K	W	W	K	K	W	W
SCRI_RS_231208	4H	67.5637	-	-	K	K	K	K	K	K	K	K	K	K	K	K	K	K	K	K	K	K	K	K	K	K	K	K	K	K	K	K	K	K	K	K	K	K	K	K	K	K	K	W	W	K	K	W	W
SCRI_RS_159331	4H	67.7054	4H	65.62	K	K	K	K	K	K	K	K	K	K	K	K	K	K	K	K	K	K	K	K	K	K	K	K	K	K	K	K	K	K	K	K	K	K	K	K	K	K	K	W	W	K	K	W	W
SCRI_RS_106799	4H	67.7054	4H	65.62	K	K	K	K	K	K	K	K	K	K	K	K	K	K	K	K	K	K	K	K	K	K	K	K	K	K	K	K	K	K	K	K	K	K	K	K	K	K	K	W	W	K	K	W	W
BOPA1_2490-1786	4H	67.7054	4H	67.91	K	K	K	K	K	K	K	K	K	K	K	K	K	K	K	K	K	K	K	K	K	K	K	K	K	K	K	K	K	K	K	K	K	K	K	K	K	K	K	W	K	K	K	W	W
SCRI_RS_4583	4H	69.3343	-	-	K	K	K	K	K	K	K	K	K	K	K	K	K	K	K	K	K	K	K	K	K	K	K	K	K	K	K	K	K	K	K	K	K	K	K	K	K	K	K	W	W	K	K	W	W
BOPA2_12_31362	4H	70.3258	4H	67.91	K	K	K	K	K	K	K	K	K	K	K	K	K	K	K	K	K	K	K	K	K	K	K	K	K	K	K	K	K	K	K	K	K	K	K	K	K	K	K	W	K	K	K	W	W
SCRI_RS_119486	4H	70.3258	4H	67.91	K	K	K	K	K	K	K	K	K	K	K	K	K	K	K	K	K	K	K	K	K	K	K	K	K	K	K	K	K	K	K	K	K	K	K	K	K	K	K	W	K	K	K	W	W
SCRI_RS_179438	4H	73.5127	4H	71.11	K	K	K	K	K	K	K	K	K	K	K	K	K	K	K	K	K	K	K	K	K	K	K	K	K	K	K	K	K	K	K	K	K	K	K	K	K	K	K	W	K	K	K	W	W
SCRI_RS_221945	4H	73.5127	-	-	K	K	K	K	K	K	K	M	K	K	K	K	K	K	K	K	K	K	K	K	K	K	K	K	K	K	K	K	K	K	K	K	K	K	K	K	K	K	K	W	K	K	K	W	W
BOPA1_8463-466	4H	73.6544	4H	70.33	K	K	K	K	K	K	K	K	K	K	K	K	K	K	K	K	K	K	K	K	K	K	K	K	K	K	K	K	K	K	K	K	K	K	K	K	K	K	K	W	K	K	K	W	W
SCRI_RS_164399	4H	73.6544	-	-	K	K	K	K	K	K	K	K	K	K	K	K	K	K	K	K	K	K	K	K	K	K	K	K	K	K	K	K	K	K	K	K	K	K	K	K	K	K	K	W	K	K	K	W	W
SCRI_RS_200957	4H	76.2748	4H	73.91	K	K	K	K	K	K	K	K	K	K	K	K	K	K	K	K	K	K	K	K	K	K	K	K	K	K	K	K	K	K	K	K	K	K	K	K	K	K	K	W	K	K	K	W	W
BOPA1_4250-402	4H	78.5411	4H	76.11	K	K	K	K	K	K	K	K	K	K	K	K	K	K	K	K	K	K	K	K	K	K	K	K	K	K	K	K	K	K	K	K	K	K	K	K	K	K	K	W	K	K	K	W	W
SCRI_RS_181725	4H	78.5411	4H	76.11	K	K	K	K	K	K	K	K	K	K	K	K	K	K	K	K	K	K	K	K	K	K	K	K	K	K	K	K	K	K	K	K	K	K	K	K	K	K	K	W	K	K	K	W	W
BOPA1_1523-1136	4H	78.6827	4H	76.31	K	K	K	K	K	K	K	K	K	K	K	K	K	K	K	K	K	K	K	K	K	K	K	K	K	K	K	K	K	K	K	K	K	K	K	K	K	K	K	W	K	K	K	W	W
SCRI_RS_223734	4H	78.6827	4H	76.31	K	K	K	K	K	K	K	K	K	K	K	K	K	K	K	K	K	K	K	K	K	K	K	K	K	K	K	K	K	K	K	K	K	K	K	K	K	K	K	W	K	K	K	W	W
SCRI_RS_7523	4H	78.6827	4H	76.31	K	K	K	K	K	K	K	K	K	K	K	K	K	K	K	K	K	K	K	K	K	K	K	K	K	K	K	K	K	K	K	K	K	K	K	K	K	K	K	W	K	K	K	W	W
BOPA1_8653-475	4H	78.6827	4H	70.52	K	K	K	K	K	K	K	K	K	K	K	K	K	K	K	K	K	K	K	K	K	K	K	K	K	K	K	K	K	K	K	K	K	K	K	K	K	K	K	W	K	K	K	W	W
BOPA1_9149-1316	4H	78.6827	4H	70.33	K	K	K	K	K	K	K	K	K	K	K	K	K	K	K	K	K	K	K	K	K	K	K	K	K	K	K	K	K	K	K	K	K	K	K	K	K	K	K	W	K	K	K	W	W
BOPA2_12_31231	4H	78.6827	4H	70.33	K	K	K	K	K	K	K	K	K	K	K	K	K	K	K	K	K	K	K	K	K	K	K	K	K	K	K	K	K	K	K	K	K	K	K	K	K	K	K	W	K	K	K	W	W
SCRI_RS_166474	4H	78.6827	-	-	K	K	K	K	K	K	K	K	K	K	K	K	K	K	K	K	K	K	K	K	K	K	K	K	K	K	K	K	K	K	K	K	K	K	K	K	K	K	K	W	K	K	K	W	W
SCRI_RS_165833	4H	78.6827	-	-	K	K	K	K	K	K	K	K	K	K	K	K	K	K	K	K	K	K	K	K	K	K	K	K	K	K	K	K	K	K	K	K	K	K	K	K	K	K	K	W	K	K	K	W	W
SCRI_RS_163062	4H	78.8244	-	-	K	K	K	K	K	K	K	K	K	K	K	K	K	K	K	K	K	K	K	K	K	K	K	K	K	K	K	K	K	K	K	K	K	K	K	K	K	K	K	W	K	K	K	W	W
SCRI_RS_214059	4H	78.8244	-	-	K	K	K	K	K	K	K	K	K	K	K	K	K	K	K	K	K	K	K	K	K	K	K	K	K	K	K	K	K	K	K	K	K	K	K	K	K	K	K	W	K	K	K	W	W
SCRI_RS_13460	4H	78.8244	-	-	K	K	K	K	K	K	K	K	K	K	K	K	K	K	K	K	K	K	K	K	K	K	K	K	K	K	K	K	K	K	K	K	K	K	K	K	K	K	K	W	K	K	K	W	W
BOPA2_12_31246	4H	80.4533	4H	78.11	K	K	K	K	K	K	K	K	K	K	K	K	K	K	K	K	K	K	K	K	K	K	K	K	K	K	K	K	K	K	K	K	K	K	K	K	K	K	K	W	K	K	K	W	W
SCRI_RS_176669	4H	80.4533	-	-	K	K	K	K	K	K	K	K	K	K	K	K	K	K	K	K	K	K	K	K	K	K	K	K	K	K	K	K	K	K	K	K	K	K	K	K	K	K	K	W	K	K	K	W	W
SCRI_RS_134956	4H	81.2323	4H	78.53	K	K	K	K	K	K	K	K	K	K	K	K	K	K	K	K	K	K	K	K	K	K	K	K	K	K	K	K	K	K	K	K	K	K	K	K	K	K	K	W	K	K	K	W	W
BOPA1_4039-1686	4H	85.5524	4H	83.34	K	K	K	K	K	K	K	K	K	K	K	K	K	K	K	K	K	K	K	K	K	K	K	K	K	K	K	K	K	K	K	K	K	K	K	K	K	K	K	K	K	K	K	K	K
BOPA1_2400-956	4H	85.5524	4H	81.96	K	K	K	K	K	K	K	K	K	K	K	K	K	K	K	K	K	K	K	K	K	K	K	K	K	K	K	K	K	K	K	K	K	K	K	K	K	K	K	K	K	K	K	K	K
SCRI_RS_210971	4H	85.8357	4H	83.34	K	K	K	K	K	K	K	K	K	K	K	K	K	K	K	K	K	K	K	K	K	K	K	K	K	K	K	K	K	K	K	K	K	K	K	K	K	K	K	K	K	K	K	K	K
SCRI_RS_157760	4H	90.864	4H	88.44	K	K	K	K	K	K	K	K	K	K	K	K	K	K	K	K	K	K	K	K	K	K	K	K	K	K	K	K	K	K	K	K	K	K	K	K	K	K	K	K	K	K	K	K	K
SCRI_RS_168399	4H	91.1473	4H	88.64	K	K	K	K	K	K	K	K	K	K	K	K	K	K	K	K	K	K	K	K	K	K	K	K	K	K	K	K	K	K	K	K	K	K	K	K	K	K	K	K	K	K	K	K	K
SCRI_RS_165236	4H	91.1473	-	-	K	K	K	K	K	K	K	K	K	K	K	K	K	K	K	K	K	K	K	K	K	K	K	K	K	K	K	K	K	K	K	K	K	K	K	K	K	K	K	K	K	K	K	K	K
BOPA1_4361-1867	4H	91.289	4H	88.84	K	K	K	K	K	K	K	K	K	K	K	K	K	K	K	K	K	K	K	K	K	K	K	K	K	K	K	K	K	K	K	K	K	K	K	K	K	K	K	K	K	K	K	K	K
SCRI_RS_129218	4H	91.7139	4H	89.24	K	K	K	K	K	K	K	K	K	K	K	K	K	K	K	K	K	K	K	K	K	K	K	K	K	K	K	K	K	K	K	K	K	K	K	K	K	K	K	K	K	K	K	K	K
SCRI_RS_121084	4H	92.847	4H	90.34	K	K	K	K	K	K	K	K	K	K	K	K	K	K	K	K	K	K	K	K	K	K	K	K	K	K	K	K	K	K	K	K	K	K	K	K	K	K	K	K	K	K	K	K	K
BOPA2_12_30718	4H	97.1671	4H	94.74	K	K	K	K	K	K	K	K	K	K	K	K	K	K	K	K	K	K	K	K	K	K	K	K	K	K	K	K	K	K	K	K	K	K	K	K	K	K	K	K	K	K	K	K	K
SCRI_RS_182626	4H	97.1671	4H	94.74	K	K	K	K	K	K	K	K	K	K	K	K	K	K	K	K	K	K	K	K	K	K	K	K	K	K	K	K	K	K	K	K	K	K	K	K	K	K	K	K	K	K	K	K	K
SCRI_RS_193252	4H	97.1671	-	-	K	K	K	K	K	K	K	K	K	K	K	K	K	K	K	K	K	K	K	K	K	K	K	K	K	K	K	K	K	K	K	K	K	K	K	K	K	K	K	K	K	K	K	K	K
BOPA2_12_10271	4H	97.3088	4H	94.84	K	K	K	K	K	K	K	K	K	K	K	K	K	K	K	K	K	K	K	K	K	K	K	K	K	K	K	K	K	K	K	K	K	K	K	K	K	K	K	K	K	K	K	K	K
SCRI_RS_122057	4H	97.3088	-	-	K	K	K	K	K	K	K	K	K	K	K	K	K	K	K	K	K	K	K	K	K	K	K	K	K	K	K	K	K	K	K	K	K	K	K	K	K	K	K	K	K	K	K	K	K
BOPA1_4535-1366	4H	98.9377	4H	96.6	K	K	K	K	K	K	K	K	K	K	K	K	K	K	K	K	K	K	K	K	K	K	K	K	K	K	K	K	K	K	K	K	K	K	K	K	K	K	K	K	K	K	K	K	K
BOPA2_12_10666	4H	98.9377	4H	96.99	K	K	K	K	K	K	K	K	K	K	K	K	K	K	K	K	K	K	K	K	K	K	K	K	K	K	K	K	K	K	K	K	K	K	K	K	K	K	K	K	K	K	K	K	K
SCRI_RS_168581	4H	99.0793	4H	97.19	K	K	K	K	K	K	K	K	K	K	K	K	K	K	K	K	K	K	K	K	K	K	K	K	K	K	K	K	K	K	K	K	K	K	K	K	K	K	K	K	K	K	K	K	K
SCRI_RS_168591	4H	99.0793	4H	97.19	K	K	K	K	K	K	K	K	K	K	K	K	K	K	K	K	K	K	K	K	K	K	K	K	K	K	K	K	K	K	K	K	K	K	K	K	K	K	K	K	K	K	K	K	K
SCRI_RS_188827	4H	99.221	4H	97.29	K	K	K	K	K	K	K	K	K	K	K	K	K	K	K	K	K	K	K	K	K	K	K	K	K	K	K	K	K	K	K	K	K	K	K	K	K	K	K	K	K	K	K	K	K
BOPA1_ConsensusGBS0288-1	4H	99.5751	4H	98.65	K	K	K	K	K	K	K	K	K	K	K	K	K	K	K	K	K	K	K	K	K	K	K	K	K	K	K	K	K	K	K	K	K	K	K	K	K	K	K	K	K	K	K	K	K
SCRI_RS_207853	4H	99.5751	-	-	K	K	K	K	K	K	K	K	K	K	K	K	K	K	K	K	K	K	K	K	K	K	K	K	K	K	K	K	K	K	K	K	K	K	K	K	K	K	K	K	K	K	K	K	K
SCRI_RS_228030	4H	99.5751	-	-	K	K	K	K	K	K	K	K	K	K	K	K	K	K	K	K	K	K	K	K	K	K	K	K	K	K	K	K	K	K	K	K	K	K	K	K	K	K	K	K	K	K	K	K	K
BOPA1_299-163	4H	100.637	4H	99.68	K	K	K	K	K	K	K	K	K	K	K	K	K	K	K	K	K	K	K	K	K	K	K	K	K	K	K	K	K	K	K	K	K	K	K	K	K	K	K	K	K	K	K	K	K
BOPA1_41-695	4H	100.637	4H	99.69	K	K	K	K	K	K	K	K	K	K	K	K	K	K	K	K	K	K	K	K	K	K	K	K	K	K	K	K	K	K	K	K	K	K	K	K	K	K	K	K	K	K	K	K	K
BOPA2_12_30987	4H	100.637	4H	99.68	K	K	K	K	K	K	K	K	K	K	K	K	K	K	K	K	K	K	K	K	K	K	K	K	K	K	K	K	K	K	K	K	K	K	K	K	K	K	K	K	K	K	K	K	K
SCRI_RS_197256	4H	101.275	4H	100.38	K	K	K	K	K	K	K	K	K	K	K	K	K	K	K	K	K	K	K	K	K	K	K	K	K	K	K	K	K	K	K	K	K	K	K	K	K	K	K	K	K	K	K	K	K
BOPA1_3652-872	4H	101.416	4H	100.38	K	K	K	K	K	K	K	K	K	K	K	K	K	K	K	K	K	K	K	K	K	K	K	K	K	K	K	K	K	K	K	K	K	K	K	K	K	K	K	K	K	K	K	K	K
SCRI_RS_141803	4H	101.558	4H	100.68	K	K	K	K	K	K	K	K	K	K	K	K	K	K	K	K	K	K	K	K	K	K	K	K	K	K	K	K	K	K	K	K	K	K	K	K	K	K	K	K	K	K	K	K	K
SCRI_RS_10818	4H	102.125	4H	101.68	K	K	K	K	K	K	K	K	K	K	K	K	K	K	K	K	K	K	K	K	K	K	K	K	K	K	K	K	K	K	K	K	K	K	K	K	K	K	K	K	K	K	K	K	K
SCRI_RS_153700	4H	102.125	4H	101.68	K	K	K	K	K	K	K	K	K	K	K	K	K	K	K	K	K	K	K	K	K	K	K	K	K	K	K	K	K	K	K	K	K	K	K	K	K	K	K	K	K	K	K	K	K
SCRI_RS_16715	4H	102.125	4H	101.68	K	K	K	K	K	K	K	K	K	K	K	K	K	K	K	K	K	K	K	K	K	K	K	K	K	K	K	K	K	K	K	K	K	K	K	K	K	K	K	K	K	K	K	K	K
BOPA1_2614-1522	4H	102.55	4H	102.08	K	K	K	K	K	K	K	K	K	K	K	K	K	K	K	K	K	K	K	K	K	K	K	K	K	K	K	K	K	K	K	K	K	K	K	K	K	K	K	K	K	K	K	K	K
SCRI_RS_200445	4H	102.62	4H	102.18	K	K	K	K	K	K	K	K	K	K	K	K	K	K	K	K	K	K	K	K	K	K	K	K	K	K	K	K	K	K	K	K	K	K	K	K	K	K	K	K	K	K	K	K	K
SCRI_RS_170388	4H	102.62	4H	102.18	K	K	K	K	K	K	K	K	K	K	K	K	K	K	K	K	K	K	K	K	K	K	K	K	K	K	K	K	K	K	K	K	K	K	K	K	K	K	K	K	K	K	K	K	K
SCRI_RS_9549	4H	102.762	4H	102.38	K	K	K	K	K	K	K	K	K	K	K	K	K	K	K	K	K	K	K	K	K	K	K	K	K	K	K	K	K	K	K	K	K	K	K	K	K	K	K	K	K	K	K	K	K
SCRI_RS_157611	4H	103.754	4H	103.38	K	K	K	K	K	K	K	K	K	K	K	K	K	K	K	K	K	K	K	K	K	K	K	K	K	K	K	K	K	K	K	K	K	K	K	K	K	K	K	K	K	K	K	K	K
SCRI_RS_148330	4H	103.895	4H	103.48	K	K	K	K	K	K	K	K	K	K	K	K	K	K	K	K	K	K	K	K	K	K	K	K	K	K	K	K	K	K	K	K	K	K	K	K	K	K	K	K	K	K	K	K	K
SCRI_RS_196076	4H	110.198	4H	111.65	K	K	K	K	K	K	K	K	K	K	K	K	K	K	K	K	K	K	K	K	K	K	K	K	K	K	K	K	K	K	K	K	K	K	K	K	K	K	K	K	K	K	K	K	K
BOPA2_12_10032	4H	110.198	-	-	K	K	K	K	K	K	K	K	K	K	K	K	K	K	K	K	K	K	K	K	K	K	K	K	K	K	K	K	K	K	K	K	K	K	K	K	K	K	K	K	K	K	K	K	K
SCRI_RS_157866	4H	110.694	4H	112.79	K	K	K	K	K	K	K	K	K	K	K	K	K	K	K	K	K	K	K	K	K	K	K	K	K	K	K	K	K	K	K	K	K	K	K	K	K	K	K	K	K	K	K	K	K
BOPA1_4160-1365	4H	111.331	4H	117.13	K	K	K	K	K	K	K	K	K	K	K	K	K	K	K	K	K	K	K	K	K	K	K	K	K	K	K	K	K	K	K	K	K	K	K	K	K	K	K	K	K	K	K	K	K
BOPA1_6019-296	4H	111.331	4H	117.13	K	K	K	K	K	K	K	K	K	K	K	K	K	K	K	K	K	K	K	K	K	K	K	K	K	K	K	K	K	K	K	K	K	K	K	K	K	K	K	K	K	K	K	K	K
SCRI_RS_192456	4H	111.331	4H	117.13	K	K	K	K	K	K	K	K	K	K	K	K	K	K	K	K	K	K	K	K	K	K	K	K	K	K	K	K	K	K	K	K	K	K	K	K	K	K	K	K	K	K	K	K	K
SCRI_RS_107762	4H	111.331	4H	117.13	K	K	K	K	K	K	K	K	K	K	K	K	K	K	K	K	K	K	K	K	K	K	K	K	K	K	K	K	K	K	K	K	K	K	K	K	K	K	K	K	K	K	K	K	K
BOPA1_2297-1250	4H	113.385	4H	120.53	K	K	K	K	K	K	K	K	K	K	K	K	K	K	K	K	K	K	K	K	K	K	K	K	K	K	K	K	K	K	K	K	K	K	K	K	K	K	K	K	K	K	K	K	K
SCRI_RS_9164	4H	113.739	4H	120.53	K	K	K	K	K	K	K	K	K	K	K	K	K	K	K	K	K	K	K	K	K	K	K	K	K	K	K	K	K	K	K	K	K	K	K	K	K	K	K	K	K	K	K	K	K
SCRI_RS_151357	4H	114.943	4H	120.73	K	K	K	K	K	K	K	K	K	K	K	K	K	K	K	K	K	K	K	K	K	K	K	K	K	K	K	K	K	K	K	K	K	K	K	K	K	K	K	K	K	K	K	K	K
SCRI_RS_188829	4H	115.227	4H	121.03	K	K	K	K	K	K	K	K	K	K	K	K	K	K	K	K	K	K	K	K	K	K	K	K	K	K	K	K	K	K	K	K	K	K	K	K	K	K	K	K	K	K	K	K	K
BOPA1_166-154	5H	0.138889	5H	1.22	K	K	K	K	K	K	K	K	K	K	K	K	K	K	K	K	K	K	K	K	K	K	K	K	K	K	K	K	K	K	K	K	K	K	K	K	K	K	K	K	K	K	K	K	K
BOPA2_12_30979	5H	0.138889	5H	3.66	K	K	K	K	K	K	K	K	K	K	K	K	K	K	K	K	K	K	K	K	K	K	K	K	K	K	K	K	K	K	K	K	K	K	K	K	K	K	K	K	K	K	K	K	K
BOPA2_12_31022	5H	0.138889	-	-	K	K	K	K	K	K	K	K	K	K	K	K	K	K	K	K	K	K	K	K	K	K	K	K	K	K	K	K	K	K	K	K	K	K	K	K	K	K	K	K	K	K	K	K	K
SCRI_RS_147811	5H	0.138889	-	-	K	K	K	K	K	K	K	K	K	K	K	K	K	K	K	K	K	K	K	K	K	K	K	K	K	K	K	K	K	K	K	K	K	K	K	K	K	K	K	K	K	K	K	K	K
SCRI_RS_179411	5H	0.972222	5H	2.12	K	K	K	K	K	K	K	K	K	K	K	K	K	K	K	K	K	K	K	K	K	K	K	K	K	K	K	K	K	K	K	K	K	K	K	K	K	K	K	K	K	K	K	K	K
SCRI_RS_109375	5H	1.11111	5H	2.22	K	K	K	K	K	K	K	K	K	K	K	K	K	K	K	K	K	K	K	K	K	K	K	K	K	K	K	K	K	K	K	K	K	K	K	K	K	K	K	K	K	K	K	K	K
SCRI_RS_10929	5H	1.52778	5H	2.62	K	K	K	K	K	K	K	K	K	K	K	K	K	K	K	K	K	K	K	K	K	K	K	K	K	K	K	K	K	K	K	K	K	K	K	K	K	K	K	K	K	K	K	K	K
SCRI_RS_133909	5H	1.59722	5H	3.66	K	K	K	K	K	K	K	K	K	K	K	K	K	K	K	K	K	K	K	K	K	K	K	K	K	K	K	K	K	K	K	K	K	K	K	K	K	K	K	K	K	K	K	K	K
SCRI_RS_141591	5H	1.73611	5H	3.76	K	K	K	K	K	K	K	K	K	K	K	K	K	K	K	K	K	K	K	K	K	K	K	K	K	K	K	K	K	K	K	K	K	K	K	K	K	K	K	K	K	K	K	K	K
SCRI_RS_31797	5H	2.22222	5H	4.26	K	K	K	K	K	K	K	K	K	K	K	K	K	K	K	K	K	K	K	K	K	K	K	K	K	K	K	K	M	K	K	K	K	K	K	K	K	K	K	K	K	K	K	K	K
BOPA1_1582-63	5H	4.16667	5H	6.55	K	K	K	K	K	K	K	K	K	K	K	K	K	K	K	K	K	K	K	K	K	K	K	K	K	K	K	K	K	K	K	K	K	K	K	K	K	K	K	K	K	K	K	K	K
SCRI_RS_181570	5H	8.61111	-	-	K	K	K	K	K	K	K	K	K	K	K	K	K	K	K	K	K	K	K	K	K	K	K	K	K	K	K	K	K	K	K	K	K	K	K	K	K	K	K	K	K	K	K	K	K
SCRI_RS_204607	5H	9.30556	-	-	K	K	K	K	K	K	K	K	K	K	K	K	K	K	K	K	K	K	K	K	K	K	K	K	K	K	K	K	K	K	K	K	K	K	K	K	K	K	K	K	K	K	K	K	K
SCRI_RS_143952	5H	10.8333	5H	12.27	K	K	K	K	K	K	K	K	K	K	K	K	K	K	K	K	K	K	K	K	K	K	K	K	K	K	K	K	K	K	K	K	K	K	K	K	K	K	K	K	K	K	K	K	K
BOPA2_12_30714	5H	12.0139	5H	13.47	K	K	K	K	K	K	K	K	K	K	K	K	K	K	K	K	K	K	K	K	K	K	K	K	K	K	K	K	K	K	K	K	K	K	K	K	K	K	K	K	K	K	K	K	K
SCRI_RS_108541	5H	12.0139	5H	13.47	K	K	K	K	K	K	K	K	K	K	K	K	K	K	K	K	K	K	K	K	K	K	K	K	K	K	K	K	K	K	K	K	K	K	K	K	K	K	K	K	K	K	K	K	K
SCRI_RS_149877	5H	14.5139	5H	18.14	K	K	K	K	K	K	K	K	K	K	K	K	K	K	K	K	K	K	K	K	K	K	K	K	K	K	K	K	K	K	K	K	K	K	K	K	K	K	K	K	K	K	K	K	K
BOPA2_12_30167	5H	17.5694	5H	21.24	K	K	K	K	K	K	K	K	K	K	K	K	K	K	K	K	K	K	K	K	K	K	K	K	K	K	K	K	K	K	K	K	K	K	K	K	K	K	K	K	K	K	K	K	K
BOPA1_9608-371	5H	18.1944	5H	21.24	K	K	K	K	K	K	K	K	K	K	K	K	K	K	K	K	K	K	K	K	K	K	K	K	K	K	K	K	K	K	K	K	K	K	K	K	K	K	K	K	K	K	K	K	K
SCRI_RS_194819	5H	23.1944	5H	26.24	K	K	K	K	K	K	K	K	K	K	K	K	K	K	K	K	K	K	K	K	K	K	K	K	K	K	K	K	K	K	K	K	K	K	K	K	K	K	K	K	K	K	K	K	K
BOPA1_ABC01741-1-4-299	5H	23.6111	5H	27.8	K	K	K	K	K	K	K	K	K	K	K	K	K	K	K	K	K	K	K	K	K	K	K	K	K	K	K	K	K	K	K	K	K	K	K	K	K	K	K	K	K	K	K	K	K
SCRI_RS_85089	5H	23.6111	5H	26.36	K	K	K	K	K	K	K	K	K	K	K	K	K	K	K	K	K	K	K	K	K	K	K	K	K	K	K	K	K	K	K	K	K	K	K	K	K	K	K	K	K	K	K	K	K
BOPA1_4684-775	5H	28.2639	5H	31.06	K	K	K	K	K	K	K	K	K	K	K	K	K	K	K	K	K	K	K	K	K	K	K	K	K	K	K	K	K	K	K	K	K	K	K	K	K	K	K	K	K	K	K	K	K
SCRI_RS_189936	5H	28.2639	-	-	K	K	K	K	K	K	K	K	K	K	K	K	K	K	K	K	K	K	K	K	K	K	K	K	K	K	K	K	K	K	K	K	K	K	K	K	K	K	K	K	K	K	K	K	K
SCRI_RS_190770	5H	28.2639	-	-	K	K	K	K	K	K	K	K	K	K	K	K	K	K	K	K	K	K	K	K	K	K	K	K	K	K	K	K	K	K	K	K	K	K	K	K	K	K	K	K	K	K	K	K	K
SCRI_RS_221631	5H	28.2639	-	-	K	K	K	K	K	K	K	K	K	K	K	K	K	K	K	K	K	K	K	K	K	K	K	K	K	K	K	K	K	K	K	K	K	K	K	K	K	K	K	K	K	K	K	K	K
SCRI_RS_92500	5H	28.2639	-	-	K	K	K	K	K	K	K	K	K	K	K	K	K	K	K	K	K	K	K	K	K	K	K	K	K	K	K	K	K	K	K	K	K	K	K	K	K	K	K	K	K	K	K	K	K
SCRI_RS_108416	5H	29.0972	5H	31.86	K	K	K	K	K	K	K	K	K	K	K	K	K	K	K	K	K	K	K	K	K	K	K	K	K	K	K	K	K	K	K	K	K	K	K	K	K	K	K	K	K	K	K	K	K
SCRI_RS_205100	5H	29.0972	5H	31.86	K	K	K	K	K	K	K	K	K	K	K	K	K	K	K	K	K	K	K	K	K	K	K	K	K	K	K	K	K	K	K	K	K	K	K	K	K	K	K	K	K	K	K	K	K
SCRI_RS_203117	5H	30.0694	5H	32.86	K	K	K	K	K	K	K	K	K	K	K	K	K	K	K	K	K	K	K	K	K	K	K	K	K	K	K	K	K	K	K	K	K	K	K	K	K	K	K	K	K	K	K	K	K
SCRI_RS_179512	5H	30.0694	5H	32.86	K	K	K	K	K	K	K	K	K	K	K	K	K	K	K	K	K	K	K	K	K	K	K	K	K	K	K	K	K	K	K	K	K	K	K	K	K	K	K	K	K	K	K	K	K
SCRI_RS_207889	5H	30.0694	-	-	K	K	K	K	K	K	K	K	K	K	K	K	K	K	K	K	K	K	K	K	K	K	K	K	K	K	K	K	K	K	K	K	K	K	K	K	K	K	K	K	K	K	K	K	K
SCRI_RS_203585	5H	30.0694	-	-	K	K	K	K	K	K	K	K	K	K	K	K	K	K	K	K	K	K	K	K	K	K	K	K	K	K	K	K	K	K	K	K	K	K	K	K	K	K	K	K	K	K	K	K	K
SCRI_RS_175087	5H	30.4167	5H	33.16	K	K	K	K	K	K	K	K	K	K	K	K	K	K	K	K	K	K	K	K	K	K	K	K	K	K	K	K	K	K	K	K	K	K	K	K	K	K	K	K	K	K	K	K	K
SCRI_RS_144042	5H	30.4167	-	-	K	K	K	K	K	K	K	K	K	K	K	K	K	K	K	K	K	K	K	K	K	K	K	K	K	K	K	K	K	K	K	K	K	K	K	K	K	K	K	K	K	K	K	K	K
BOPA1_3997-796	5H	30.5556	5H	33.22	K	K	K	K	K	K	K	K	K	K	K	K	K	K	K	K	K	K	K	K	K	K	K	K	K	K	K	K	K	K	K	K	K	K	K	K	K	K	K	K	K	K	K	K	K
SCRI_RS_205508	5H	30.8333	5H	34.45	K	K	K	K	K	K	K	K	K	K	K	K	K	K	K	K	K	K	K	K	K	K	K	K	K	K	K	K	K	K	K	K	K	K	K	K	K	K	K	K	K	K	K	K	K
SCRI_RS_171189	5H	31.25	5H	34.95	K	K	K	K	K	K	K	K	K	K	K	K	K	K	K	K	K	K	K	K	K	K	K	K	K	K	K	K	K	K	K	K	K	K	K	K	K	K	K	K	K	K	K	K	K
BOPA1_421-528	5H	31.6667	5H	35.35	K	K	K	K	K	K	K	K	K	K	K	K	K	K	K	K	K	K	K	K	K	K	K	K	K	K	K	K	K	K	K	K	K	K	K	K	K	K	K	K	K	K	K	K	K
SCRI_RS_179526	5H	31.6667	5H	35.15	K	K	K	K	K	K	K	K	K	K	K	K	K	K	K	K	K	K	K	K	K	K	K	K	K	K	K	K	K	K	K	K	K	K	K	K	K	K	K	K	K	K	K	K	K
SCRI_RS_220164	5H	31.6667	5H	35.15	K	K	K	K	K	K	K	K	K	K	K	K	K	K	K	K	K	K	K	K	K	K	K	K	K	K	K	K	K	K	K	K	K	K	K	K	K	K	K	K	K	K	K	K	K
SCRI_RS_220165	5H	31.6667	5H	35.15	K	K	K	K	K	K	K	K	K	K	K	K	K	K	K	K	K	K	K	K	K	K	K	K	K	K	K	K	K	K	K	K	K	K	K	K	K	K	K	K	K	K	K	K	K
SCRI_RS_156295	5H	31.9444	5H	35.42	K	K	K	K	K	K	K	K	K	K	K	K	K	K	K	K	K	K	K	K	K	K	K	K	K	K	K	K	K	K	K	K	K	K	K	K	K	K	K	K	K	K	K	K	K
SCRI_RS_3114	5H	32.4306	5H	35.92	K	K	K	K	K	K	K	K	K	K	K	K	K	K	K	K	K	K	K	M	K	K	K	M	K	K	K	K	K	K	K	K	K	K	K	K	K	K	K	K	K	K	K	K	K
BOPA1_4977-567	5H	34.0972	5H	37.62	K	K	K	K	K	K	K	K	K	K	K	K	K	K	K	K	K	K	K	K	K	K	K	K	K	K	K	K	K	K	K	K	K	K	K	K	K	K	K	K	K	K	K	K	K
BOPA1_5732-1104	5H	34.0972	5H	37.62	K	K	K	K	K	K	K	K	K	K	K	K	K	K	K	K	K	K	K	K	K	K	K	K	K	K	K	K	K	K	K	K	K	K	K	K	K	K	K	K	K	K	K	K	K
BOPA1_9100-978	5H	34.2361	5H	37.62	K	K	K	K	K	K	K	K	K	K	K	K	K	K	K	K	K	K	K	K	K	K	K	K	K	K	K	K	K	K	K	K	K	K	K	K	K	K	K	K	K	K	K	K	K
SCRI_RS_175090	5H	38.125	5H	41.52	K	K	K	K	K	K	K	K	K	K	K	K	K	K	K	K	K	K	K	K	K	K	K	K	K	K	K	K	K	K	K	K	K	K	K	K	K	K	K	K	K	K	K	K	K
SCRI_RS_160471	5H	40.7639	5H	42.07	K	K	K	K	K	K	K	K	K	K	K	K	K	K	K	K	K	K	K	K	K	K	K	K	K	K	K	K	K	K	K	K	K	K	K	K	K	K	K	K	K	K	K	K	K
BOPA1_2267-1173	5H	41.3194	5H	42.07	K	K	K	K	K	K	K	K	K	K	K	K	K	K	K	K	K	K	K	K	K	K	K	K	K	K	K	K	K	K	K	K	K	K	K	K	K	K	K	K	K	K	K	K	K
SCRI_RS_89108	5H	41.3194	5H	42.07	K	K	K	K	K	K	K	K	K	K	K	K	K	K	K	K	K	K	K	K	K	K	K	K	K	K	K	K	K	K	K	K	K	K	K	K	K	K	K	K	K	K	K	K	K
SCRI_RS_163973	5H	41.3194	5H	42.07	K	K	K	K	K	K	K	K	K	K	K	K	K	K	K	K	K	K	K	K	K	K	K	K	K	K	K	K	K	K	K	K	K	K	K	K	K	K	K	K	K	K	K	K	K
SCRI_RS_157065	5H	41.3194	-	-	K	K	K	K	K	K	K	K	K	K	K	K	K	K	K	K	K	K	K	K	K	K	K	K	K	K	K	K	K	K	K	K	K	K	K	K	K	K	K	K	K	K	K	K	K
SCRI_RS_185617	5H	41.3194	-	-	K	K	K	K	K	K	K	K	K	K	K	K	K	K	K	K	K	K	K	K	K	K	K	K	K	K	K	K	K	K	K	K	K	K	K	K	K	K	K	K	K	K	K	K	K
BOPA1_3498-761	5H	41.7361	5H	42.07	K	K	K	K	K	K	K	K	K	K	K	K	K	K	K	K	K	K	K	K	K	K	K	K	K	K	K	K	K	K	K	K	K	K	K	K	K	K	K	K	K	K	K	K	K
SCRI_RS_204593	5H	41.7361	5H	42.07	K	K	K	K	K	K	K	K	K	K	K	K	K	K	K	K	K	K	K	K	K	K	K	K	K	K	K	K	K	K	K	K	K	K	K	K	K	K	K	K	K	K	K	K	K
SCRI_RS_229712	5H	41.7361	5H	42.07	K	K	K	K	K	K	K	K	K	K	K	K	K	K	K	K	K	K	K	K	K	K	K	K	K	K	K	K	K	K	K	K	K	K	K	K	K	K	K	K	K	K	K	K	K
SCRI_RS_187842	5H	41.7361	-	-	K	K	K	K	K	K	K	K	K	K	K	K	K	K	K	K	K	K	K	K	K	K	K	K	K	K	K	K	K	K	K	K	K	K	K	K	K	K	K	K	K	K	K	K	K
SCRI_RS_159069	5H	41.8056	5H	42.07	K	K	K	K	K	K	K	K	K	K	K	K	K	K	K	K	K	K	K	K	K	K	K	K	K	K	K	K	K	K	K	K	K	K	K	K	K	K	K	K	K	K	K	K	K
SCRI_RS_182015	5H	41.8056	5H	42.07	K	K	K	K	K	K	K	K	K	K	K	K	K	K	K	K	K	K	K	K	K	K	K	K	K	K	K	K	K	K	K	K	K	K	K	K	K	K	K	K	K	K	K	K	K
SCRI_RS_197942	5H	41.8056	5H	42.07	K	K	K	K	K	K	K	K	K	K	K	K	K	K	K	K	K	K	K	K	K	K	K	K	K	K	K	K	K	K	K	K	K	K	K	K	K	K	K	K	K	K	K	K	K
SCRI_RS_197817	5H	41.8056	5H	42.07	K	K	K	K	K	K	K	K	K	K	K	K	K	K	K	K	K	K	K	K	K	K	K	K	K	K	K	K	K	K	K	K	K	K	K	K	K	K	K	K	K	K	K	K	K
SCRI_RS_150377	5H	41.8056	-	-	K	K	K	K	K	K	K	K	K	K	K	K	K	K	K	K	K	K	K	K	K	K	K	K	K	K	K	K	K	K	K	K	K	K	K	K	K	K	K	K	K	K	K	K	K
SCRI_RS_98248	5H	42.0139	5H	42.07	K	K	K	K	K	K	K	K	K	K	K	K	K	K	K	K	K	K	K	K	K	K	K	K	K	K	K	K	K	K	K	K	K	K	K	K	K	K	K	K	K	K	K	K	K
BOPA2_12_20416	5H	42.0139	-	-	K	K	K	K	K	K	K	K	K	K	K	K	K	K	K	K	K	K	K	K	K	K	K	K	K	K	K	K	K	K	K	K	K	K	K	K	K	K	K	K	K	K	K	K	K
SCRI_RS_103840	5H	42.1528	-	-	K	K	K	K	K	K	K	K	K	K	K	K	K	K	K	K	K	K	K	K	K	K	K	K	K	K	K	K	K	K	K	K	K	K	K	K	K	K	K	K	K	K	K	K	K
SCRI_RS_216162	5H	42.7778	5H	42.72	K	K	K	K	K	K	K	K	K	K	K	K	K	K	K	K	K	K	K	K	K	K	K	K	K	K	K	K	K	K	K	K	K	K	K	K	K	K	K	K	K	K	K	K	K
BOPA2_12_21372	5H	42.8472	5H	42.87	K	K	K	K	K	K	K	K	K	K	K	K	K	K	K	K	K	K	K	K	K	K	K	K	K	K	K	K	K	K	K	K	K	K	K	K	K	K	K	K	K	K	K	K	K
SCRI_RS_133662	5H	42.8472	5H	42.72	K	K	K	K	K	K	K	K	K	K	K	K	K	K	K	K	K	K	K	K	K	K	K	K	K	K	K	K	K	K	K	K	K	K	K	K	K	K	K	K	K	K	K	K	K
SCRI_RS_138727	5H	42.9861	5H	42.92	K	K	K	K	K	K	K	K	K	K	K	K	K	K	K	K	K	K	K	K	K	K	K	K	K	K	K	K	K	K	K	K	K	K	K	K	K	K	K	K	K	K	K	K	K
SCRI_RS_189103	5H	42.9861	5H	42.92	K	K	K	K	K	K	K	K	K	K	K	K	K	K	K	K	K	K	K	K	K	K	K	K	K	K	K	K	K	K	K	K	K	K	K	K	K	K	K	K	K	K	K	K	K
SCRI_RS_189402	5H	43.5417	5H	43.42	K	K	K	K	K	K	K	K	K	K	K	K	K	K	K	K	K	K	K	K	K	K	K	K	K	K	K	K	K	K	K	K	K	K	K	K	K	K	K	K	K	K	K	K	K
BOPA1_9209-298	5H	43.9583	5H	43.92	K	K	K	K	K	K	K	K	K	K	K	K	K	K	K	K	K	K	K	K	K	K	K	K	K	K	K	K	K	K	K	K	K	K	K	K	K	K	K	K	K	K	K	K	K
BOPA1_9766-787	5H	43.9583	5H	43.92	K	K	K	K	K	K	K	K	K	K	K	K	K	K	K	K	K	K	K	K	K	K	K	K	K	K	K	K	K	K	K	K	K	K	K	K	K	K	K	K	K	K	K	K	K
BOPA1_ABC08327-1-1-353	5H	43.9583	5H	43.92	K	K	K	K	K	K	K	K	K	K	K	K	K	K	K	K	K	K	K	K	K	K	K	K	K	K	K	K	K	K	K	K	K	K	K	K	K	K	K	K	K	K	K	K	K
SCRI_RS_102075	5H	43.9583	5H	43.82	K	K	K	K	K	K	K	K	K	K	K	K	K	K	K	K	K	K	K	K	K	K	K	K	K	K	K	K	K	K	K	K	K	K	K	K	K	K	K	K	K	K	K	K	K
SCRI_RS_133538	5H	43.9583	5H	43.82	K	K	K	K	K	K	K	K	K	K	K	K	K	K	K	K	K	K	K	K	K	K	K	K	K	K	K	K	K	K	K	K	K	K	K	K	K	K	K	K	K	K	K	K	K
SCRI_RS_153463	5H	43.9583	5H	43.82	K	K	K	K	K	K	K	K	K	K	K	K	K	K	K	K	K	K	K	K	K	K	K	K	K	K	K	K	K	K	K	K	K	K	K	K	K	K	K	K	K	K	K	K	K
SCRI_RS_156505	5H	43.9583	5H	43.82	K	K	K	K	K	K	K	K	K	K	K	K	K	K	K	K	K	K	K	K	K	K	K	K	K	K	K	K	K	K	K	K	K	K	K	K	K	K	K	K	K	K	K	K	K
SCRI_RS_170957	5H	43.9583	5H	43.82	K	K	K	K	K	K	K	K	K	K	K	K	K	K	K	K	K	K	K	K	K	K	K	K	K	K	K	K	K	K	K	K	K	K	K	K	K	K	K	K	K	K	K	K	K
SCRI_RS_218181	5H	43.9583	5H	43.82	K	K	K	K	K	K	K	K	K	K	K	K	K	K	K	K	K	K	K	K	K	K	K	K	K	K	K	K	K	K	K	K	K	K	K	K	K	K	K	K	K	K	K	K	K
SCRI_RS_231784	5H	43.9583	5H	43.82	K	K	K	K	K	K	K	K	K	K	K	K	K	K	K	K	K	K	K	K	K	K	K	K	K	K	K	K	K	K	K	K	K	K	K	K	K	K	K	K	K	K	K	K	K
SCRI_RS_153139	5H	43.9583	5H	43.82	K	K	K	K	K	K	K	K	K	K	K	K	K	K	K	K	K	K	K	K	K	K	K	K	K	K	K	K	K	K	K	K	K	K	K	K	K	K	K	K	K	K	K	K	K
SCRI_RS_8076	5H	43.9583	5H	43.82	K	M	K	K	K	K	K	K	K	K	K	K	K	K	K	K	K	M	K	K	K	K	M	K	K	M	K	K	K	K	M	K	K	K	M	K	M	K	K	K	K	K	K	M	K
SCRI_RS_159315	5H	43.9583	5H	43.82	K	K	K	K	K	K	K	K	K	K	K	K	K	K	K	K	K	K	K	K	K	K	K	K	K	K	K	K	K	K	K	K	K	K	K	K	K	K	K	K	K	K	K	K	K
SCRI_RS_161386	5H	43.9583	5H	43.82	K	K	K	K	K	K	K	K	K	K	K	K	K	K	K	K	K	K	K	K	K	K	K	K	K	K	K	K	K	K	K	K	K	K	K	K	K	K	K	K	K	K	K	K	K
SCRI_RS_3544	5H	43.9583	5H	43.82	K	K	K	K	K	K	K	K	K	K	K	K	K	K	K	K	K	K	K	K	K	K	K	K	K	K	K	K	K	K	K	K	K	K	K	K	K	K	K	K	K	K	K	K	K
SCRI_RS_13902	5H	43.9583	5H	43.82	K	K	K	K	K	K	K	K	K	K	K	K	K	K	K	K	K	K	M	K	K	K	K	K	K	K	K	K	K	K	K	K	K	K	K	K	K	K	K	K	K	K	K	K	K
BOPA1_1215-862	5H	44.2361	5H	43.92	K	K	K	K	K	K	K	K	K	K	K	K	K	K	K	K	K	K	K	K	K	K	K	K	K	K	K	K	K	K	K	K	K	K	K	K	K	K	K	K	K	K	K	K	K
BOPA1_1286-990	5H	44.2361	5H	43.92	K	K	K	K	K	K	K	K	K	K	K	K	K	K	K	K	K	K	K	K	K	K	K	K	K	K	K	K	K	K	K	K	K	K	K	K	K	K	K	K	K	K	K	K	K
BOPA1_152-329	5H	44.2361	5H	43.92	K	K	K	K	K	K	K	K	K	K	K	K	K	K	K	K	K	K	K	K	K	K	K	K	K	K	K	K	K	K	K	K	K	K	K	K	K	K	K	K	K	K	K	K	K
BOPA1_3012-1125	5H	44.2361	5H	43.92	K	K	K	K	K	K	K	K	K	K	K	K	K	K	K	K	K	K	K	K	K	K	K	K	K	K	K	K	K	K	K	K	K	K	K	K	K	K	K	K	K	K	K	K	K
BOPA1_4154-364	5H	44.2361	5H	43.92	K	K	K	K	K	K	K	K	K	K	K	K	K	K	K	K	K	K	K	K	K	K	K	K	K	K	K	K	K	K	K	K	K	K	K	K	K	K	K	K	K	K	K	K	K
BOPA1_5850-2347	5H	44.2361	5H	43.92	K	K	K	K	K	K	K	K	K	K	K	K	K	K	K	K	K	K	K	K	K	K	K	K	K	K	K	K	K	K	K	K	K	K	K	K	K	K	K	K	K	K	K	K	K
BOPA1_8631-469	5H	44.2361	5H	43.92	K	K	K	K	K	K	K	K	K	K	K	K	K	K	K	K	K	K	K	K	K	K	K	K	K	K	K	K	K	K	K	K	K	K	K	K	K	K	K	K	K	K	K	K	K
BOPA1_8852-318	5H	44.2361	5H	43.92	K	K	K	K	K	K	K	K	K	K	K	K	K	K	K	K	K	K	K	K	K	K	K	K	K	K	K	K	M	K	K	K	K	K	K	K	K	K	K	K	K	K	K	M	K
BOPA2_12_30408	5H	44.2361	5H	43.92	K	K	K	K	K	K	K	K	K	K	K	K	K	K	K	K	K	K	K	K	K	K	K	K	K	K	K	K	K	K	K	K	K	K	K	K	K	K	K	K	K	K	K	K	K
BOPA2_12_30728	5H	44.2361	5H	43.92	K	K	K	K	K	K	K	K	K	K	K	K	K	K	K	K	K	K	K	K	K	K	K	K	K	K	K	K	K	K	K	K	K	K	K	K	K	K	K	K	K	K	K	K	K
BOPA2_12_30729	5H	44.2361	5H	43.92	K	K	K	K	K	K	K	K	K	K	K	K	K	K	K	K	K	K	K	K	K	K	K	K	K	K	K	K	K	K	K	K	K	K	K	K	K	K	K	K	K	K	K	K	K
BOPA2_12_31259	5H	44.2361	5H	43.92	K	K	K	K	K	K	K	K	K	K	K	K	K	K	K	K	K	K	K	K	K	K	K	K	K	K	K	K	K	K	K	K	K	K	K	K	K	K	K	K	K	K	K	K	K
SCRI_RS_10219	5H	44.2361	5H	43.92	K	K	K	K	K	K	K	K	K	K	K	K	K	K	K	K	K	K	K	K	K	K	K	K	K	K	K	K	K	K	K	K	K	K	K	K	K	K	K	K	K	K	K	K	K
SCRI_RS_130708	5H	44.2361	5H	43.92	K	K	K	K	K	K	K	K	K	K	K	K	K	K	K	K	K	K	K	K	K	K	K	K	K	K	K	K	K	K	K	K	K	K	K	K	K	K	K	K	K	K	K	K	K
SCRI_RS_132280	5H	44.2361	5H	43.92	K	K	K	K	K	K	K	K	K	K	K	K	K	K	K	K	K	K	K	K	K	K	K	K	K	K	K	K	K	K	K	K	K	K	K	K	K	K	K	K	K	K	K	K	K
SCRI_RS_139961	5H	44.2361	5H	43.92	K	K	K	K	K	K	K	K	K	K	K	K	K	K	K	K	K	K	K	K	K	K	K	K	K	K	K	K	K	K	K	K	K	K	K	K	K	K	K	K	K	K	K	K	K
SCRI_RS_144850	5H	44.2361	5H	43.92	K	K	K	K	K	K	K	K	K	K	K	K	K	K	K	K	K	K	K	K	K	K	K	K	K	K	K	K	K	K	K	K	K	K	K	K	K	K	K	K	K	K	K	K	K
SCRI_RS_151755	5H	44.2361	5H	43.92	K	K	K	K	K	K	K	K	K	K	K	K	K	K	K	K	K	K	K	K	K	K	K	K	K	K	K	K	K	K	K	K	K	K	K	K	K	K	K	K	K	K	K	K	K
SCRI_RS_154965	5H	44.2361	5H	43.92	K	K	K	K	K	K	K	K	K	K	K	K	K	K	K	K	K	K	K	K	K	K	K	K	K	K	K	K	K	K	K	K	K	K	K	K	K	K	K	K	K	K	K	K	K
SCRI_RS_156276	5H	44.2361	5H	43.92	M	K	K	K	K	K	K	K	K	K	K	K	K	K	M	K	K	K	K	K	M	K	K	K	K	K	K	K	K	K	K	K	K	K	M	K	K	K	K	K	K	K	K	M	K
SCRI_RS_157294	5H	44.2361	5H	43.92	K	K	K	K	K	K	K	K	K	K	K	K	K	K	K	K	K	K	K	K	K	K	K	K	K	K	K	K	K	K	K	K	K	K	K	K	K	K	K	K	K	K	K	K	K
SCRI_RS_166343	5H	44.2361	5H	43.92	K	K	K	K	K	K	K	K	K	K	K	K	K	K	K	K	K	K	K	K	K	K	K	K	K	K	K	K	K	K	K	K	K	K	K	K	K	K	K	K	K	K	K	K	K
SCRI_RS_168105	5H	44.2361	5H	43.92	K	K	K	K	K	K	K	K	K	K	K	K	K	K	K	K	K	K	K	K	K	K	K	K	K	K	K	K	K	K	K	K	K	K	K	K	K	K	K	K	K	K	K	K	K
SCRI_RS_169826	5H	44.2361	5H	43.92	K	K	K	K	K	K	K	K	K	K	K	K	K	K	K	K	K	K	K	K	K	K	K	K	K	K	K	K	K	K	K	K	K	K	K	K	K	K	K	K	K	K	K	K	K
SCRI_RS_173527	5H	44.2361	5H	43.92	K	K	K	K	K	K	K	K	K	K	K	K	K	K	K	K	K	K	K	K	K	K	K	K	K	K	K	K	K	K	K	K	K	K	K	K	K	K	K	K	K	K	K	K	K
SCRI_RS_175637	5H	44.2361	5H	43.92	K	K	K	K	K	K	K	K	K	K	K	K	K	K	K	K	K	K	K	K	K	K	K	K	K	K	K	K	K	K	K	K	K	K	K	K	K	K	K	K	K	K	K	K	K
SCRI_RS_203996	5H	44.2361	5H	43.92	K	K	K	K	K	K	K	K	K	K	K	K	K	K	K	K	K	K	K	K	K	K	K	K	K	K	K	K	K	K	K	K	K	K	K	K	K	K	K	K	K	K	K	K	K
SCRI_RS_237877	5H	44.2361	5H	43.92	K	K	K	K	K	K	K	K	K	K	K	K	K	K	K	K	K	K	K	K	K	K	K	K	K	K	K	K	K	K	K	K	K	K	K	K	K	K	K	K	K	K	K	K	K
SCRI_RS_4724	5H	44.2361	5H	43.92	K	K	K	K	K	K	K	K	K	K	K	K	K	K	K	K	K	K	K	K	K	K	K	K	K	K	K	K	K	K	K	K	K	K	K	K	K	K	K	K	K	K	K	K	K
SCRI_RS_8464	5H	44.2361	5H	43.92	K	K	K	K	K	K	K	K	K	K	K	K	K	K	K	K	K	K	K	K	K	K	K	K	K	K	K	K	K	K	K	K	K	K	K	K	K	K	K	K	K	K	K	K	K
SCRI_RS_134225	5H	44.2361	5H	43.92	K	K	K	K	K	K	K	K	K	K	K	K	K	K	K	K	K	K	K	K	K	K	K	K	K	K	K	K	K	K	K	K	K	K	K	K	K	K	K	K	K	K	K	K	K
SCRI_RS_156086	5H	44.2361	5H	43.92	K	K	K	K	K	K	K	K	K	K	K	K	K	K	K	K	K	K	K	K	K	K	K	K	K	K	K	K	K	K	K	K	K	K	K	K	K	K	K	K	K	K	K	K	K
SCRI_RS_240108	5H	44.2361	5H	43.92	K	K	K	K	K	K	K	K	K	K	K	K	K	K	K	K	K	K	K	K	K	K	K	K	K	K	K	K	K	K	K	K	K	K	K	K	K	K	K	K	K	K	K	K	K
SCRI_RS_205661	5H	44.2361	5H	43.92	K	K	K	K	K	K	K	K	K	K	K	K	K	K	K	K	K	K	K	K	K	K	K	K	K	K	K	K	K	K	K	K	K	K	K	K	K	K	K	K	K	K	K	K	K
SCRI_RS_223318	5H	44.2361	5H	43.92	K	K	K	K	K	K	K	K	K	K	K	K	K	K	K	K	K	K	K	K	K	K	K	K	K	K	K	K	K	K	K	K	K	K	K	K	K	K	K	K	K	K	K	K	K
SCRI_RS_166374	5H	44.2361	5H	43.92	K	K	K	K	K	K	K	K	K	K	K	K	K	K	K	K	K	K	K	K	K	K	K	K	K	K	K	K	K	K	K	K	K	K	K	K	K	K	K	K	K	K	K	K	K
SCRI_RS_236446	5H	44.2361	5H	43.92	K	K	K	K	K	K	K	K	K	K	K	K	K	K	K	K	K	K	K	K	K	K	K	K	K	K	K	K	K	K	K	K	K	K	K	K	K	K	K	K	K	K	K	K	K
SCRI_RS_237910	5H	44.2361	5H	43.92	K	K	K	K	K	K	K	K	K	K	K	K	K	K	K	K	K	K	K	K	K	K	K	K	K	K	K	K	K	K	K	K	K	K	K	K	K	K	K	K	K	K	K	K	K
SCRI_RS_209553	5H	44.2361	5H	43.92	K	K	K	K	K	K	K	K	K	K	K	K	K	K	K	K	K	K	K	K	K	K	K	K	K	K	K	K	K	K	K	K	K	K	K	K	K	K	K	K	K	K	K	K	K
SCRI_RS_188359	5H	44.2361	5H	43.92	K	K	K	K	K	K	K	K	K	K	K	K	K	K	K	K	K	K	K	K	K	K	K	K	K	K	K	K	K	K	K	K	K	K	K	K	K	K	K	K	K	K	K	K	K
SCRI_RS_219788	5H	44.2361	5H	43.92	K	K	K	K	K	K	K	K	K	K	K	K	K	K	K	K	K	K	K	K	K	K	K	K	K	K	K	K	K	K	K	K	K	K	K	K	K	K	K	K	K	K	K	K	K
SCRI_RS_136857	5H	44.2361	5H	43.92	K	K	K	K	K	K	K	K	K	K	K	K	K	K	K	K	K	K	K	K	K	K	K	K	K	K	K	K	K	K	K	K	K	K	K	K	K	K	K	K	K	K	K	K	K
SCRI_RS_142549	5H	44.2361	5H	43.92	K	K	K	K	K	K	K	K	K	K	K	K	K	K	K	K	K	K	K	K	K	K	K	K	K	K	K	K	K	K	K	K	K	K	K	K	K	K	K	K	K	K	K	K	K
SCRI_RS_1928	5H	44.2361	5H	43.92	K	K	K	K	K	K	K	K	K	K	K	K	K	K	K	K	K	K	K	K	K	K	K	K	K	K	K	K	K	K	K	K	K	K	K	K	K	K	K	K	K	K	K	K	K
SCRI_RS_103377	5H	44.2361	5H	43.92	K	K	K	K	K	K	K	K	K	K	K	K	K	K	K	K	K	K	K	K	K	K	K	K	K	K	K	K	K	K	K	K	K	K	K	K	K	K	K	K	K	K	K	K	K
SCRI_RS_221695	5H	44.2361	5H	43.92	K	K	K	K	K	K	K	K	K	K	K	K	K	K	K	K	K	K	K	K	K	K	K	K	K	K	K	K	K	K	K	K	K	K	K	K	K	K	K	K	K	K	K	K	K
SCRI_RS_162380	5H	44.2361	5H	43.92	K	K	K	K	K	K	K	K	K	K	K	K	K	K	K	K	K	K	K	K	K	K	K	K	K	K	K	K	K	K	K	K	K	K	K	K	K	K	K	K	K	K	K	K	K
SCRI_RS_150023	5H	44.2361	5H	43.92	K	K	K	K	K	K	K	K	K	K	K	K	K	K	K	K	K	K	K	K	K	K	K	K	K	K	K	K	K	K	K	K	K	K	K	K	K	K	K	K	K	K	K	K	K
SCRI_RS_232700	5H	44.2361	-	-	K	K	K	K	K	K	K	K	K	K	K	K	K	K	K	K	K	K	K	K	K	K	K	K	K	K	K	K	K	K	K	K	K	K	K	K	K	K	K	K	K	K	K	K	K
SCRI_RS_161221	5H	44.2361	-	-	K	K	M	K	M	K	K	K	K	K	K	K	K	K	K	K	K	K	M	K	K	K	K	K	K	K	K	K	K	K	K	K	K	K	K	K	K	K	K	K	M	M	K	K	K
SCRI_RS_223100	5H	44.375	5H	43.92	K	K	K	K	K	K	K	K	K	K	K	K	K	K	K	K	K	K	K	K	K	K	K	K	K	K	K	K	K	K	K	K	K	K	K	K	K	K	K	K	K	K	K	K	K
BOPA1_4392-450	5H	44.5139	5H	43.92	K	K	K	K	K	K	K	K	K	K	K	K	K	K	K	K	K	K	K	K	K	K	K	K	K	K	K	K	K	K	K	K	K	K	K	K	K	K	K	K	K	K	K	K	K
BOPA1_ABC05926-1-1-51	5H	44.5139	5H	43.92	K	K	K	K	K	K	K	K	K	K	K	K	K	K	K	K	K	K	K	K	K	K	K	K	K	K	K	K	K	K	K	K	K	K	K	K	K	K	K	K	K	K	K	K	K
BOPA2_12_30717	5H	44.5139	5H	43.92	K	K	K	K	K	K	K	K	K	K	K	K	K	K	K	K	K	K	K	K	K	K	K	K	K	K	K	K	K	K	K	K	K	K	K	K	K	K	K	K	K	K	K	K	K
SCRI_RS_195073	5H	44.5139	5H	43.92	K	K	K	K	K	K	K	K	K	K	K	K	K	K	K	K	K	K	K	K	K	K	K	K	K	K	K	K	K	K	K	K	K	K	K	K	K	K	K	K	K	K	K	K	K
SCRI_RS_41519	5H	44.5139	5H	43.92	K	K	K	K	K	K	K	K	K	K	K	K	K	K	K	K	K	K	K	K	K	K	K	K	K	K	K	K	K	K	K	K	K	K	K	K	K	K	K	K	K	K	K	K	K
SCRI_RS_229980	5H	44.5139	5H	43.92	K	K	K	K	K	K	K	K	K	K	K	K	K	K	K	K	K	K	K	K	K	K	K	K	K	K	K	K	K	K	K	K	K	K	K	K	K	K	K	K	K	K	K	K	K
BOPA1_8320-955	5H	44.5139	5H	43.92	K	K	K	K	K	K	K	K	K	K	K	K	K	K	K	K	K	K	K	K	K	K	K	K	K	K	K	K	K	K	K	K	K	K	K	K	K	K	K	K	K	K	K	K	K
BOPA1_ABC10705-1-1-263	5H	44.5139	5H	43.92	K	K	K	K	K	K	K	K	K	K	K	K	K	K	K	K	K	K	K	K	K	K	K	K	K	K	K	K	K	K	K	K	K	K	K	K	K	K	K	K	K	K	K	K	K
SCRI_RS_236984	5H	44.5139	-	-	K	K	K	K	K	K	K	K	K	K	K	K	K	K	K	K	K	K	K	K	K	K	K	K	K	K	K	K	K	K	K	K	K	K	K	K	K	K	K	K	K	K	K	K	K
SCRI_RS_160321	5H	44.5139	-	-	K	K	K	K	K	K	K	K	K	K	K	K	K	K	K	K	K	K	K	K	K	K	K	K	K	K	K	K	K	K	K	K	K	K	K	K	K	K	K	K	K	K	K	K	K
BOPA1_ConsensusGBS0527-5	5H	44.7917	5H	43.92	K	K	K	K	K	K	K	K	K	K	K	K	K	K	K	K	K	K	K	K	K	K	K	K	K	K	K	K	K	K	K	K	K	K	K	K	K	K	K	K	K	K	K	K	K
BOPA2_12_30193	5H	44.7917	5H	43.92	K	K	K	K	K	K	K	K	K	K	K	K	K	K	K	K	K	K	K	K	K	K	K	K	K	K	K	K	K	K	K	K	K	K	K	K	K	K	K	K	K	K	K	K	K
SCRI_RS_161107	5H	44.7917	5H	43.92	K	K	K	K	K	K	K	K	K	K	K	K	K	K	K	K	K	K	K	K	K	K	K	K	K	K	K	K	K	K	K	K	K	K	K	K	K	K	K	K	K	K	K	K	K
SCRI_RS_224213	5H	45.1389	5H	43.92	K	K	K	K	K	K	K	K	K	K	K	K	K	K	K	K	K	K	K	K	K	K	K	K	K	K	K	K	K	K	K	K	K	K	K	K	K	K	K	K	K	K	K	K	K
SCRI_RS_135425	5H	45.2083	5H	43.92	K	K	K	K	K	K	K	K	K	K	K	K	K	K	K	K	K	K	K	K	K	K	K	K	K	K	K	K	K	K	K	K	K	K	K	K	K	K	K	K	K	K	K	K	K
BOPA1_2283-2913	5H	46.1806	5H	44.2	K	K	K	K	K	K	K	K	K	K	K	K	K	K	K	K	K	K	K	K	K	K	K	K	K	K	K	K	K	K	K	K	K	K	K	K	K	K	K	K	K	K	K	K	K
BOPA1_7741-527	5H	46.1806	5H	43.92	K	K	K	K	K	K	K	K	K	K	K	K	K	K	K	K	K	K	K	K	K	K	K	K	K	K	K	K	K	K	K	K	K	K	K	K	K	K	K	K	K	K	K	K	K
SCRI_RS_88410	5H	46.1806	5H	44.1	K	K	K	K	K	K	K	K	K	K	K	K	K	K	K	K	K	K	K	K	K	K	K	K	K	K	K	K	K	K	K	K	K	K	K	K	K	K	K	K	K	K	K	K	K
SCRI_RS_147462	5H	46.3194	5H	44.49	K	K	K	K	K	K	K	K	K	K	K	K	K	K	K	K	K	K	K	K	K	K	K	K	K	K	K	K	K	K	K	K	K	K	K	K	K	K	K	K	K	K	K	K	K
SCRI_RS_160506	5H	46.3194	5H	44.49	K	K	K	K	K	K	K	K	K	K	K	K	K	K	K	K	K	K	K	K	K	K	K	K	K	K	K	K	K	K	K	K	K	K	K	K	K	K	K	K	K	K	K	K	K
SCRI_RS_180342	5H	46.4583	5H	44.69	K	K	K	K	K	K	K	K	K	K	K	K	K	K	K	K	K	K	K	K	K	K	K	K	K	K	K	K	K	K	K	K	K	K	K	K	K	K	K	K	K	K	K	K	K
SCRI_RS_153476	5H	46.6667	5H	44.79	K	K	K	K	K	K	K	K	K	K	K	K	K	K	K	K	K	K	K	K	K	K	K	K	K	K	K	K	K	K	K	K	K	K	K	K	K	K	K	K	K	K	K	K	K
BOPA1_12045-83	5H	46.7361	5H	44.99	K	K	K	K	K	K	K	K	K	K	K	K	K	K	K	K	K	K	K	K	K	K	K	K	K	K	K	K	K	K	K	K	K	K	K	K	K	K	K	K	K	K	K	K	K
SCRI_RS_165878	5H	46.7361	5H	44.79	K	K	K	K	K	K	K	K	K	K	K	K	K	K	K	K	K	K	K	K	K	K	K	K	K	K	K	K	K	K	K	K	K	K	K	K	K	K	K	K	K	K	K	K	K
SCRI_RS_75826	5H	46.7361	5H	44.79	K	K	K	K	K	K	K	K	K	K	K	K	K	K	K	K	K	K	K	K	K	K	K	K	K	K	K	K	K	K	K	K	K	K	K	K	K	K	K	K	K	K	K	K	K
SCRI_RS_235908	5H	47.0139	5H	44.99	K	K	K	K	K	K	K	K	K	K	K	K	K	K	K	K	K	K	K	K	K	K	K	K	K	K	K	K	K	K	K	K	K	K	K	K	K	K	K	K	K	K	K	K	K
SCRI_RS_13964	5H	47.1528	5H	44.99	K	K	K	K	K	K	K	K	K	K	K	K	K	K	K	K	K	K	K	K	K	K	K	K	K	K	K	K	K	K	K	K	K	K	K	K	K	K	K	K	K	K	K	K	K
BOPA1_2146-2256	5H	47.2222	5H	44.99	K	K	K	K	K	K	K	K	K	K	K	K	K	K	K	K	K	K	K	K	K	K	K	K	K	K	K	K	K	K	K	K	K	K	K	K	K	K	K	K	K	K	K	K	K
SCRI_RS_133042	5H	47.2222	5H	44.99	K	K	K	K	K	K	K	K	K	K	K	K	K	K	K	K	K	K	K	K	K	K	K	K	K	K	K	K	K	K	K	K	K	K	K	K	K	K	K	K	K	K	K	K	K
SCRI_RS_162444	5H	47.2222	5H	44.99	K	K	K	K	K	K	K	K	K	K	K	K	K	K	K	K	K	K	K	K	K	K	K	K	K	K	K	K	K	K	K	K	K	K	K	K	K	K	K	K	K	K	K	K	K
SCRI_RS_147429	5H	47.2222	5H	44.99	K	K	K	K	K	K	K	K	K	K	K	K	K	K	K	K	K	K	K	K	K	K	K	K	K	K	K	K	K	K	K	K	K	K	K	K	K	K	K	K	K	K	K	K	K
BOPA1_5591-403	5H	47.6389	5H	44.99	K	K	K	K	K	K	K	K	K	K	K	K	K	K	K	K	K	K	K	K	K	K	K	K	K	K	K	K	K	K	K	K	K	K	K	K	K	K	K	K	K	K	K	K	K
BOPA1_ABC10045-1-1-164	5H	47.6389	5H	44.99	K	K	K	K	K	K	K	K	K	K	K	K	K	K	K	K	K	K	K	K	K	K	K	K	K	K	K	K	K	K	K	K	K	K	K	K	K	K	K	K	K	K	K	K	K
BOPA2_12_30747	5H	47.7083	5H	44.99	K	K	K	K	K	K	K	K	K	K	K	K	K	K	K	K	K	K	K	K	K	K	K	K	K	K	K	K	K	K	K	K	K	K	K	K	K	K	K	K	K	K	K	K	K
SCRI_RS_122965	5H	47.7083	5H	44.99	K	K	K	K	K	K	K	K	K	K	K	K	K	K	K	K	K	K	K	K	K	K	K	K	K	K	K	K	K	K	K	K	K	K	K	K	K	K	K	K	K	K	K	K	K
SCRI_RS_144696	5H	47.7083	5H	44.99	K	K	K	K	K	K	K	K	K	K	K	K	K	K	K	K	K	K	K	K	K	K	K	K	K	K	K	K	K	K	K	K	K	K	K	K	K	K	K	K	K	K	K	K	K
SCRI_RS_234598	5H	47.7083	5H	44.99	K	K	K	K	K	K	K	K	K	K	K	K	K	K	K	K	K	K	K	K	K	K	K	K	K	K	K	K	K	K	K	K	K	K	K	K	K	K	K	K	K	K	K	K	K
SCRI_RS_182320	5H	47.7083	5H	44.99	K	K	K	K	K	K	K	K	K	K	K	K	K	K	K	K	K	K	K	K	K	K	K	K	K	K	K	K	K	K	K	K	K	K	K	K	K	K	K	K	K	K	K	K	K
SCRI_RS_182435	5H	47.7083	5H	44.99	K	K	K	K	M	K	K	K	K	K	K	K	K	K	K	K	M	K	K	K	K	K	K	K	K	K	K	K	M	K	K	K	K	K	K	K	K	K	K	K	K	K	K	K	K
SCRI_RS_119781	5H	47.8472	5H	44.99	K	K	K	K	K	K	K	K	K	K	K	K	K	K	K	K	K	K	K	K	K	K	K	K	K	K	K	K	K	K	K	K	K	K	K	K	K	K	K	K	K	K	K	K	K
BOPA2_12_30515	5H	48.8194	5H	45.49	K	K	K	K	K	K	K	K	K	K	K	K	K	K	K	K	K	K	K	K	K	K	K	K	K	K	K	W	K	K	K	K	K	K	K	K	K	K	K	K	K	K	K	K	K
BOPA1_8561-968	5H	49.6528	5H	45.5	K	K	K	K	K	K	K	K	K	K	K	K	K	K	K	K	K	K	K	K	K	K	K	K	K	K	K	W	K	K	K	K	K	K	K	K	K	K	K	K	K	K	K	K	K
SCRI_RS_221282	5H	49.6528	5H	45.5	K	K	K	K	K	K	K	K	K	K	K	K	K	K	K	K	K	K	K	K	K	K	K	K	K	K	K	W	K	K	K	K	K	K	K	K	K	K	K	K	K	K	K	K	K
SCRI_RS_137893	5H	49.6528	5H	45.5	K	K	K	K	K	K	K	K	K	K	K	K	K	K	K	K	K	K	K	K	K	K	K	K	K	K	K	W	K	K	K	K	K	K	K	K	K	K	K	K	K	K	K	K	K
SCRI_RS_168185	5H	50	5H	45.8	K	K	K	K	K	K	K	K	K	K	K	K	K	K	K	K	K	K	K	K	K	K	K	K	K	K	K	W	K	K	K	K	K	K	K	K	K	K	K	K	K	K	K	K	K
SCRI_RS_161414	5H	51.4583	5H	47.3	K	K	K	K	K	K	K	K	K	K	K	K	K	K	K	K	K	K	K	K	K	K	K	K	K	K	K	W	K	K	K	K	K	K	K	K	K	K	K	K	K	K	K	K	K
BOPA1_2906-1177	5H	51.4583	5H	45.5	K	K	K	K	K	K	K	K	K	K	K	K	K	K	K	K	K	K	K	K	K	K	K	K	K	K	K	W	K	K	K	K	K	K	K	K	K	K	K	K	K	K	K	K	K
BOPA2_12_30745	5H	51.4583	5H	46.21	K	K	K	K	K	K	K	K	K	K	K	K	K	K	K	K	K	K	K	K	K	K	K	K	K	K	K	W	K	K	K	K	K	K	K	K	K	K	K	K	K	K	K	K	K
SCRI_RS_213753	5H	51.4583	-	-	K	K	K	K	K	K	K	K	K	K	K	K	K	K	K	K	K	K	K	K	K	K	K	K	K	K	K	W	K	K	K	K	K	K	K	K	K	K	K	K	K	K	K	K	K
BOPA1_65-778	5H	52.2917	5H	49.79	K	K	K	K	K	K	K	K	K	K	K	K	K	K	K	K	K	K	K	K	K	K	K	K	K	K	K	K	K	K	K	K	K	K	K	K	K	K	K	K	K	K	K	K	K
SCRI_RS_181722	5H	52.2917	5H	48.43	K	K	K	K	K	K	K	K	K	K	K	K	K	K	K	K	K	K	K	K	K	K	K	K	K	K	K	K	K	K	K	K	K	K	K	K	K	K	K	K	K	K	K	K	K
SCRI_RS_231238	5H	52.2917	-	-	K	K	K	K	K	K	K	K	K	K	K	K	K	K	K	K	K	K	K	K	K	K	K	K	K	K	K	K	K	K	K	K	K	K	K	K	K	K	K	K	K	K	K	K	K
SCRI_RS_221999	5H	55.5556	5H	51.73	K	K	K	K	K	K	K	K	K	K	K	K	K	K	K	K	K	K	K	K	K	K	K	K	K	K	K	K	K	K	K	K	K	K	K	K	K	K	K	K	K	K	K	K	K
BOPA1_2465-793	5H	60.8333	5H	55.83	K	K	K	K	K	K	K	K	K	K	K	K	K	K	K	K	K	K	K	K	K	K	K	K	K	K	K	K	K	W	K	K	K	K	K	K	K	K	K	K	K	M	K	K	K
BOPA1_171-1301	5H	62.5	5H	59.03	K	K	K	K	K	K	K	K	K	K	K	K	K	K	K	K	K	K	K	K	K	K	K	K	K	K	K	K	K	W	K	K	K	K	K	K	K	K	K	K	K	K	K	K	K
SCRI_RS_194572	5H	63.2639	5H	59.83	K	K	K	K	K	K	K	K	K	K	K	K	K	K	K	K	K	K	K	K	K	K	K	K	K	K	K	K	K	W	K	K	K	K	K	K	K	K	K	K	K	K	K	K	K
SCRI_RS_166296	5H	65.9722	5H	62.53	K	K	K	K	K	K	K	K	K	K	K	K	K	K	K	K	K	K	K	K	K	K	K	K	K	K	K	K	K	W	K	K	K	K	K	K	K	K	K	K	K	K	K	K	K
SCRI_RS_152347	5H	69.3056	5H	66.43	K	K	K	K	K	K	K	K	W	K	K	K	H	H	K	K	K	H	K	K	K	K	K	K	K	K	K	K	K	W	K	K	K	K	K	K	K	K	K	K	K	K	K	K	K
SCRI_RS_160332	5H	70.1389	5H	67.23	K	K	K	K	K	K	K	K	W	K	K	K	H	K	K	K	K	H	K	K	K	K	K	K	K	K	K	K	K	W	K	K	K	K	K	K	K	K	K	K	K	K	K	K	K
BOPA2_12_31427	5H	71.6667	5H	68.83	K	K	K	K	K	K	K	K	H	K	K	K	K	K	K	K	K	K	K	K	K	K	K	K	K	K	K	K	K	W	K	K	K	K	K	K	K	K	K	K	K	K	K	K	K
BOPA1_3928-513	5H	71.6667	5H	64.25	K	K	K	K	K	K	K	K	W	K	K	K	K	K	K	K	K	K	K	K	K	K	K	K	K	K	K	K	K	W	K	K	K	K	K	K	K	K	K	K	K	K	K	K	K
BOPA1_ABC14990-1-1-126	5H	71.6667	5H	68.58	K	K	K	K	K	K	K	K	W	K	K	K	K	K	K	K	K	K	K	K	K	K	K	K	K	K	K	K	K	W	K	K	K	K	K	K	K	K	K	K	K	K	K	K	K
SCRI_RS_177017	5H	71.6667	-	-	K	K	K	K	K	K	K	K	W	K	K	K	K	K	K	K	K	K	K	K	K	K	K	K	K	K	K	K	K	W	K	K	K	K	K	K	K	K	K	K	K	K	K	K	K
SCRI_RS_239779	5H	71.6667	-	-	K	K	K	K	K	K	K	K	W	K	K	K	K	K	K	K	K	K	K	K	K	K	K	K	K	K	K	K	K	W	K	K	K	K	K	K	K	K	K	K	K	K	K	K	K
SCRI_RS_128664	5H	71.6667	-	-	K	K	K	K	K	K	K	K	W	K	K	K	H	H	K	K	K	H	K	K	K	K	K	K	K	K	K	K	K	W	K	K	K	K	K	K	K	K	K	K	K	K	K	K	K
SCRI_RS_219608	5H	73.3333	5H	69.93	K	K	K	K	K	K	K	K	H	K	K	M	K	K	K	K	K	K	K	K	K	K	K	K	K	K	K	K	K	W	K	K	K	K	K	K	K	K	K	K	K	K	K	K	K
SCRI_RS_11206	5H	73.3333	5H	69.93	K	K	K	K	K	K	K	K	H	K	K	K	K	K	K	K	K	K	K	K	K	K	K	K	K	K	K	K	K	W	K	K	K	K	K	K	K	K	K	K	K	K	K	K	K
SCRI_RS_140487	5H	73.4722	5H	70.13	K	K	K	K	K	K	K	K	H	K	K	K	K	K	K	K	K	K	K	K	K	K	K	K	K	K	K	K	K	W	K	K	K	K	K	K	K	K	K	K	K	K	K	K	K
SCRI_RS_240114	5H	74.9306	5H	71.33	K	K	K	K	K	K	K	K	H	K	K	K	K	K	K	K	K	K	K	K	K	K	K	K	K	K	K	K	K	W	K	K	K	K	K	K	K	K	K	K	K	K	K	K	K
SCRI_RS_212784	5H	75.5556	5H	71.53	K	K	K	K	K	K	K	K	H	K	K	K	K	K	K	K	K	K	K	K	K	K	K	K	K	K	K	K	K	W	K	K	K	K	K	K	K	K	K	K	K	K	K	K	K
SCRI_RS_235416	5H	76.1806	5H	71.53	K	K	K	K	K	K	K	K	H	K	K	K	K	K	K	K	K	K	K	K	K	K	K	K	K	K	K	K	K	W	K	K	K	K	K	K	K	K	K	K	K	K	K	K	K
SCRI_RS_91994	5H	76.1806	-	-	K	K	K	K	K	K	K	K	H	K	K	K	K	K	K	K	K	K	K	K	K	K	K	K	K	K	K	K	K	W	K	K	K	K	K	K	K	K	K	K	K	K	K	K	K
BOPA1_39-843	5H	77.0833	5H	72.22	K	K	K	K	K	K	K	K	K	K	K	K	K	K	K	K	K	K	K	K	K	K	K	K	K	K	K	K	K	W	K	K	K	K	K	K	K	K	K	K	K	K	K	K	K
BOPA1_5440-455	5H	80.3472	5H	76.34	K	K	K	K	K	K	K	K	K	K	K	K	K	K	K	K	K	K	K	K	K	K	K	K	K	K	K	K	K	K	K	K	K	K	K	K	K	K	K	K	K	K	K	K	H
SCRI_RS_153937	5H	80.3472	5H	76.14	K	K	K	K	K	K	K	K	K	K	K	K	K	K	K	K	K	K	K	K	K	K	K	K	K	K	K	K	K	K	K	K	K	K	K	K	K	K	K	K	K	K	K	K	H
SCRI_RS_147819	5H	80.3472	5H	76.14	K	K	K	K	K	K	K	K	K	K	K	K	K	K	K	K	K	K	K	K	K	K	K	K	K	K	K	K	K	K	K	K	K	K	K	K	K	K	K	K	K	K	K	K	H
BOPA1_3685-894	5H	80.3472	5H	76.34	K	K	K	K	K	K	K	K	K	K	K	K	K	K	K	K	K	K	K	K	K	K	K	K	K	K	K	K	K	K	K	K	K	K	K	K	K	K	K	K	K	K	K	K	H
BOPA1_ConsensusGBS0304-1	5H	81.3194	5H	76.34	K	K	K	K	K	K	K	K	K	K	K	K	K	K	K	K	K	K	K	K	K	K	K	K	K	K	K	K	K	K	K	K	K	K	K	K	K	K	K	K	K	K	K	K	H
BOPA2_12_30098	5H	83.4722	5H	86.18	K	K	K	K	K	K	K	K	K	K	K	K	K	K	K	K	K	K	K	K	K	K	K	K	K	K	K	K	K	K	K	K	K	K	K	K	K	K	K	K	K	K	K	K	K
SCRI_RS_161381	5H	83.4722	-	-	K	K	K	K	K	K	K	K	K	K	K	K	K	K	K	K	K	K	K	K	K	K	K	K	K	K	K	K	K	K	K	K	K	K	K	K	K	K	K	K	K	K	K	K	K
SCRI_RS_206061	5H	83.4722	-	-	K	K	K	K	K	K	K	K	K	K	K	K	K	K	K	K	K	K	K	K	K	K	K	K	K	K	K	K	K	K	K	K	K	K	K	K	K	K	K	K	K	K	K	K	H
SCRI_RS_158235	5H	87.3611	5H	82.31	K	K	K	K	K	K	K	K	K	K	K	K	K	K	K	K	K	K	K	K	K	K	K	K	K	K	K	K	K	K	K	K	K	K	K	K	K	K	K	K	K	K	K	K	H
SCRI_RS_168467	5H	87.3611	5H	82.31	K	K	K	K	K	K	K	K	K	K	K	K	K	K	K	K	K	K	K	K	K	K	K	K	K	K	K	K	K	K	K	K	K	K	K	K	K	K	K	K	K	K	K	K	H
SCRI_RS_224899	5H	87.3611	-	-	K	K	K	K	K	K	K	K	K	K	K	K	K	K	K	K	K	K	K	K	K	K	K	K	K	K	K	K	K	K	K	K	K	K	K	K	K	K	K	K	K	K	K	K	M
BOPA1_ABC14689-1-9-399	5H	87.6389	5H	84.96	K	K	K	K	K	K	K	K	K	K	K	K	K	K	K	K	K	K	K	K	K	K	K	K	K	K	K	K	K	K	K	K	K	K	K	K	K	K	K	K	K	K	K	K	H
SCRI_RS_238417	5H	87.6389	5H	82.31	K	K	K	K	K	K	K	K	K	K	K	K	K	K	K	K	K	K	K	K	K	K	K	K	K	K	K	K	K	K	K	K	K	K	K	K	K	K	K	K	K	K	K	K	H
BOPA2_12_30848	5H	93.4028	-	-	K	K	K	K	K	K	K	K	K	K	K	K	K	K	K	K	K	K	K	K	K	K	K	K	K	K	K	K	K	K	K	K	K	K	K	K	K	K	K	K	K	K	K	K	K
SCRI_RS_138826	5H	93.4028	-	-	K	K	K	K	K	K	K	K	K	K	K	K	K	K	K	K	K	K	K	K	K	K	K	K	K	K	K	K	K	K	K	K	K	K	K	K	K	K	K	K	K	K	K	K	K
SCRI_RS_147762	5H	93.4028	-	-	K	K	K	K	K	K	K	K	K	K	K	K	K	K	K	K	K	K	K	K	K	K	K	K	K	K	K	K	K	K	K	K	K	K	K	K	K	K	K	K	K	K	K	K	K
SCRI_RS_159430	5H	93.4028	-	-	K	K	K	K	K	K	K	K	K	K	K	K	K	K	K	K	K	K	K	K	K	K	K	K	K	K	K	K	K	K	K	K	K	K	K	K	K	K	K	K	K	K	K	K	K
SCRI_RS_127785	5H	94.4444	5H	87.71	K	K	K	K	K	K	K	K	K	K	K	K	K	K	K	K	K	K	K	K	K	K	K	K	K	K	K	K	K	K	K	K	K	K	K	K	K	K	K	K	K	K	K	K	K
SCRI_RS_218201	5H	94.7222	-	-	K	K	K	K	K	K	K	K	K	K	K	K	K	K	K	K	K	K	K	K	K	K	K	K	K	K	K	K	K	K	K	K	K	K	K	K	K	K	K	K	K	K	K	K	K
BOPA1_6170-304	5H	95.1389	5H	88.8	K	K	K	K	K	K	K	K	K	K	K	K	K	K	K	K	K	K	K	K	K	K	K	K	K	K	K	K	K	K	K	K	K	K	K	K	K	K	K	K	K	K	K	K	K
SCRI_RS_135254	5H	95.4861	-	-	K	K	K	K	K	K	K	K	K	K	K	K	K	K	K	K	K	K	K	K	K	K	K	K	K	K	K	K	K	K	K	K	K	K	K	K	K	K	K	K	K	K	K	K	K
SCRI_RS_13960	5H	95.9028	5H	90.22	K	K	K	K	K	K	K	K	K	K	K	K	K	K	K	K	K	K	K	K	K	K	K	K	K	K	K	K	K	K	K	K	K	K	K	K	K	K	K	K	K	K	K	K	K
SCRI_RS_165215	5H	95.9028	5H	90.22	K	K	K	K	K	K	K	K	K	K	K	K	K	K	K	K	K	K	K	K	K	K	K	K	K	K	K	K	K	K	K	K	K	K	K	K	K	K	K	K	K	K	K	K	K
SCRI_RS_192377	5H	96.5972	-	-	K	K	K	K	K	K	K	K	K	K	K	K	K	K	K	K	K	K	K	K	K	K	K	K	K	K	K	K	K	K	K	K	K	K	K	K	K	K	K	K	K	K	K	K	K
BOPA1_ABC11221-1-3-410	5H	97.1528	5H	93.16	K	K	K	K	K	K	K	K	K	K	K	K	K	K	K	K	K	K	K	K	K	K	K	K	K	K	K	K	K	K	K	K	K	K	K	K	K	K	K	K	K	K	K	K	K
SCRI_RS_152849	5H	97.2917	5H	94.05	K	K	K	K	K	K	K	K	K	K	K	K	K	K	K	K	K	K	K	K	K	K	K	K	K	K	K	K	K	K	K	K	K	K	K	K	K	K	K	K	K	K	K	K	K
SCRI_RS_171047	5H	97.2917	5H	94.05	K	K	K	K	K	K	K	K	K	K	K	K	K	K	K	K	K	K	K	K	K	K	K	K	K	K	K	K	K	K	K	K	K	K	K	K	K	K	K	K	K	K	K	K	K
SCRI_RS_142217	5H	97.2917	-	-	K	K	K	K	K	K	K	K	K	K	K	K	K	K	K	K	K	K	K	K	K	K	K	K	K	K	K	K	K	K	K	K	K	K	K	K	K	K	K	K	K	K	K	K	K
SCRI_RS_45011	5H	98.8889	5H	95.65	K	K	K	K	K	K	K	K	K	K	K	K	K	K	K	K	K	K	K	K	K	K	K	K	K	K	K	K	K	K	K	K	K	K	K	K	K	K	K	K	K	K	K	K	K
SCRI_RS_235443	5H	98.8889	-	-	K	K	K	K	K	K	K	K	K	K	K	K	K	K	K	K	K	K	K	K	K	K	K	K	K	K	K	K	K	K	K	K	K	K	K	K	K	K	K	K	K	K	K	K	K
SCRI_RS_120829	5H	98.8889	-	-	K	K	K	K	K	K	K	K	K	K	K	K	K	K	K	K	K	K	K	K	K	K	K	K	K	K	K	K	K	K	K	K	K	K	K	K	K	K	K	K	K	K	K	K	K
SCRI_RS_149088	5H	106.597	5H	103.35	K	K	K	K	K	K	K	K	K	K	K	K	K	K	K	K	K	K	K	K	K	K	K	K	K	K	K	K	K	K	K	K	K	K	K	K	K	K	K	K	K	K	K	K	K
BOPA1_5154-117	5H	107.569	4H	117.13	K	K	K	K	K	K	K	K	K	K	K	K	K	K	K	K	K	K	K	K	K	K	K	K	K	K	K	K	K	K	K	K	K	K	K	K	K	K	K	K	K	K	K	K	K
SCRI_RS_9991	5H	107.569	5H	104.35	K	K	K	K	K	K	K	K	K	K	K	K	K	K	K	K	K	K	K	K	K	K	K	K	K	K	K	K	K	K	K	K	K	K	K	K	K	K	K	K	K	K	K	K	K
SCRI_RS_224501	5H	107.569	5H	104.35	K	K	K	K	K	K	K	K	K	K	K	K	K	K	K	K	K	K	K	K	K	K	K	K	K	K	K	K	K	K	K	K	K	K	K	K	K	K	K	K	K	K	K	K	K
SCRI_RS_234720	5H	109.375	5H	106.15	K	K	K	K	K	K	K	K	K	K	K	K	K	K	K	K	K	K	K	K	K	K	K	K	K	K	K	K	K	K	K	K	K	K	K	K	K	K	K	K	K	K	K	K	K
SCRI_RS_231239	5H	109.653	5H	106.45	K	K	K	K	K	K	K	K	K	K	K	K	K	K	K	K	K	K	K	K	K	K	K	K	K	K	K	K	K	K	K	K	K	K	K	K	K	K	K	K	K	K	K	K	K
SCRI_RS_199964	5H	112.569	-	-	K	K	K	K	K	K	K	K	K	K	K	K	K	K	K	K	K	K	K	K	K	K	K	K	K	K	K	K	K	K	K	K	K	K	K	K	K	K	K	K	K	K	K	K	K
SCRI_RS_182540	5H	112.708	5H	109.45	K	K	K	K	K	K	K	K	K	K	K	K	K	K	K	K	K	K	M	M	K	K	K	K	K	K	K	K	K	K	K	K	K	K	K	K	K	K	K	M	K	K	K	K	K
SCRI_RS_236782	5H	113.472	5H	110.25	K	K	K	K	K	K	K	K	K	K	K	K	K	K	K	K	K	K	K	K	K	K	K	K	K	K	K	K	K	K	K	K	K	K	K	K	K	K	K	K	K	K	K	K	K
SCRI_RS_162696	5H	113.889	5H	110.65	K	K	H	K	K	K	K	K	K	K	K	K	K	K	K	K	K	K	K	H	K	K	K	K	K	K	K	K	K	K	K	K	K	K	K	K	K	K	K	K	K	K	K	K	K
SCRI_RS_165569	5H	114.861	5H	111.65	K	K	H	K	K	K	K	K	K	K	K	K	K	K	K	K	K	K	K	H	K	K	K	K	K	K	K	K	K	K	K	K	K	K	K	K	K	K	K	K	K	K	K	K	K
SCRI_RS_156454	5H	114.861	-	-	K	K	H	K	K	K	K	K	K	K	K	K	K	K	K	K	K	K	K	H	K	K	K	K	K	K	K	K	K	K	K	K	K	K	K	K	K	K	K	K	K	K	K	K	K
BOPA2_12_30377	5H	117.986	5H	114.75	K	K	H	K	K	K	K	K	K	K	K	K	K	K	K	K	K	K	K	H	K	K	K	K	K	K	K	K	K	K	K	K	K	K	K	K	K	K	K	K	K	K	K	K	K
SCRI_RS_148876	5H	117.986	-	-	K	K	H	K	K	K	K	K	K	K	K	K	K	K	K	K	K	K	K	H	K	K	K	K	K	K	K	K	K	K	K	K	K	K	K	K	K	K	K	K	K	K	K	K	K
SCRI_RS_162933	5H	117.986	-	-	K	K	H	K	K	K	K	K	K	K	K	K	K	K	K	K	K	K	K	H	K	K	K	K	K	K	K	K	K	K	K	K	K	K	K	K	K	K	K	K	K	K	K	K	K
SCRI_RS_220076	5H	117.986	-	-	K	K	H	K	K	K	K	K	K	K	K	K	K	K	K	K	K	K	K	H	K	K	K	K	K	K	K	K	K	K	K	K	K	K	K	K	K	K	K	K	K	K	K	K	K
SCRI_RS_154148	5H	117.986	-	-	K	K	H	K	K	K	K	K	K	K	K	K	K	K	K	K	K	K	K	H	K	K	K	K	K	K	K	K	K	K	K	K	K	K	K	K	K	K	K	K	K	K	K	K	K
SCRI_RS_209280	5H	117.986	-	-	K	K	M	K	K	K	K	K	K	K	K	K	K	K	K	K	K	K	K	H	K	K	K	K	K	K	K	K	K	K	K	K	K	K	K	K	K	K	K	K	K	K	K	K	K
SCRI_RS_7191	5H	117.986	-	-	K	K	H	K	K	K	K	K	K	K	K	K	K	K	K	K	K	K	K	H	K	K	K	K	K	K	K	K	K	K	K	K	K	K	K	K	K	K	K	K	K	K	K	K	K
BOPA1_272-944	5H	118.75	5H	115.53	K	K	H	K	K	K	K	K	K	K	K	K	K	K	K	K	K	K	K	H	K	K	K	K	K	K	K	K	K	K	K	K	K	K	K	K	K	K	K	K	K	K	K	K	K
SCRI_RS_162590	5H	118.75	5H	115.43	K	K	H	K	K	K	K	K	K	K	K	K	K	K	K	K	K	K	K	H	K	K	K	K	K	K	K	K	K	K	K	K	K	K	K	K	K	K	K	K	K	K	K	K	K
SCRI_RS_196673	5H	118.75	-	-	K	K	H	K	K	K	K	K	K	K	K	K	K	K	K	K	K	K	K	H	K	K	K	K	K	K	K	K	K	K	K	K	K	K	K	K	K	K	K	K	K	K	K	K	K
SCRI_RS_212890	5H	118.75	-	-	K	K	H	K	K	K	K	K	K	K	K	K	K	K	K	K	K	K	K	H	K	K	K	K	K	K	K	K	K	K	K	K	K	K	K	K	K	K	K	K	K	K	K	K	K
SCRI_RS_160288	5H	118.75	-	-	K	K	H	K	K	K	K	K	K	K	K	K	K	K	K	K	K	K	K	H	K	K	K	K	K	K	K	K	K	K	K	K	K	K	K	K	K	K	K	K	K	K	K	K	K
BOPA1_211-259	5H	119.375	5H	115.53	K	K	H	K	K	K	K	K	K	K	K	K	K	K	K	K	K	K	K	H	K	K	K	K	K	K	K	K	K	K	K	K	K	K	K	K	K	K	K	K	K	K	K	K	K
SCRI_RS_170159	5H	120.069	5H	116.23	K	K	H	K	K	K	K	K	K	K	K	K	K	K	K	K	K	K	K	M	K	K	K	K	K	K	K	K	K	K	K	K	K	K	K	K	K	K	K	K	K	K	K	K	K
SCRI_RS_150232	5H	120.208	5H	116.33	K	K	H	K	K	K	K	K	K	K	K	K	K	K	K	K	K	K	K	H	K	K	K	K	K	K	K	K	K	K	K	K	K	K	K	K	K	K	K	K	K	K	K	K	K
SCRI_RS_14626	5H	120.208	-	-	K	K	H	K	K	K	K	K	K	K	K	K	K	K	K	K	K	K	K	H	K	K	K	K	K	K	K	K	K	K	K	K	K	K	K	K	K	K	K	K	K	K	K	K	K
SCRI_RS_157896	5H	120.208	-	-	K	K	H	K	K	K	K	K	K	K	K	K	K	K	K	K	K	K	K	H	K	K	K	K	K	K	K	K	K	K	K	K	K	K	K	K	K	K	K	K	K	K	K	K	K
SCRI_RS_158259	5H	120.347	5H	116.43	K	K	H	K	K	K	K	K	K	K	K	K	K	K	K	K	K	K	K	H	K	K	K	K	K	K	K	K	K	K	K	K	K	K	K	K	K	K	K	K	K	K	K	K	K
BOPA1_9566-1214	5H	120.347	5H	112.78	K	K	H	K	K	K	K	K	K	K	K	K	K	K	K	K	K	K	K	H	K	K	K	K	K	K	K	K	K	K	K	K	K	K	K	K	K	K	K	K	K	K	K	K	K
SCRI_RS_188785	5H	121.25	5H	117.43	K	K	H	K	K	K	K	K	K	K	K	K	K	K	K	K	K	K	K	H	K	K	K	K	K	K	K	K	K	K	K	K	K	K	K	K	K	K	K	K	K	K	K	K	K
SCRI_RS_138146	5H	121.458	5H	117.63	K	K	H	K	K	K	K	K	K	K	K	K	K	K	K	K	K	K	K	H	K	K	K	K	K	K	K	K	K	K	K	K	K	K	K	K	K	K	K	K	K	K	K	K	K
SCRI_RS_154144	5H	122.014	5H	118.15	K	K	H	K	K	K	K	K	K	K	K	K	K	K	K	K	K	K	K	H	K	K	K	K	K	K	K	K	K	K	K	K	K	K	K	K	K	K	K	K	K	K	K	K	K
BOPA1_1697-636	5H	122.361	5H	118.55	K	K	H	K	K	K	K	K	K	K	K	K	K	K	K	K	K	K	K	H	K	K	K	K	K	K	K	K	K	K	K	K	K	K	K	K	K	K	K	K	K	K	K	K	K
BOPA1_2091-639	5H	122.431	5H	118.55	K	K	H	K	K	K	K	K	K	K	K	K	K	K	K	K	K	K	K	H	K	K	K	K	K	K	K	K	K	K	K	K	K	K	K	K	K	K	K	K	K	K	K	K	K
BOPA1_7639-122	5H	122.431	5H	119.72	K	K	H	K	K	K	K	K	K	K	K	K	K	K	K	K	K	K	K	H	K	K	K	K	K	K	K	K	K	K	K	K	K	K	K	K	K	K	K	K	K	K	K	K	K
SCRI_RS_147315	5H	122.431	5H	119.72	K	K	H	K	K	K	K	K	K	K	K	K	K	K	K	K	K	K	K	H	K	K	K	K	K	K	K	K	K	K	K	K	K	K	K	K	K	K	K	K	K	K	K	K	K
SCRI_RS_130992	5H	122.569	5H	119.72	K	K	H	K	K	K	K	K	K	K	K	K	K	K	K	K	K	K	K	K	K	K	K	K	K	K	K	K	K	K	K	K	K	K	K	K	K	K	K	K	K	K	K	K	K
SCRI_RS_193529	5H	122.569	5H	119.72	K	K	H	K	K	K	K	K	K	K	K	K	K	K	K	K	K	K	K	K	K	K	K	K	K	K	K	K	K	K	K	K	K	K	K	K	K	K	K	K	K	K	K	K	K
SCRI_RS_201248	5H	122.639	-	-	K	K	H	K	K	K	K	K	K	K	K	K	K	K	K	K	K	K	K	K	K	K	K	K	K	K	K	K	K	K	K	K	K	K	K	K	K	K	K	K	K	K	K	K	K
SCRI_RS_133602	5H	125.486	5H	119.72	K	K	H	K	K	K	K	K	K	K	K	K	K	K	K	K	K	K	K	K	K	K	K	K	K	K	K	K	K	K	K	K	K	K	K	K	K	K	K	K	K	K	K	K	K
BOPA1_5571-640	5H	125.625	5H	126.39	K	K	H	K	K	K	K	K	K	K	K	K	K	K	K	K	K	K	K	K	K	K	K	K	K	K	K	K	K	K	K	K	K	K	K	K	K	K	K	K	K	K	K	K	K
SCRI_RS_235055	5H	125.625	5H	126.19	K	K	M	K	K	K	K	K	K	K	K	K	K	K	K	K	K	K	K	K	K	K	K	K	K	K	K	K	K	K	K	K	K	K	K	K	K	K	K	K	K	K	K	K	K
SCRI_RS_148402	5H	125.625	-	-	K	K	H	K	K	K	K	K	K	K	K	K	K	K	K	K	K	K	K	K	K	K	K	K	K	K	K	K	K	K	K	K	K	K	K	K	K	K	K	K	K	K	K	K	K
SCRI_RS_237494	5H	125.625	-	-	K	K	H	K	K	K	K	K	K	K	K	K	K	K	K	K	K	K	K	K	K	K	K	K	K	K	K	K	K	K	K	K	K	K	K	K	K	K	K	K	K	K	K	K	K
BK_17	5H	125.764	-	-	K	K	H	K	K	K	K	K	K	K	K	K	K	K	K	K	K	K	K	K	K	K	K	K	K	K	K	K	K	K	K	K	K	M	K	K	K	K	K	K	K	K	K	K	K
BOPA1_1501-353	5H	125.764	5H	126.39	K	K	H	K	K	K	K	K	K	K	K	K	K	K	K	K	K	K	K	K	K	K	K	K	K	K	K	K	K	K	K	K	K	K	K	K	K	K	K	K	K	K	K	K	K
BOPA2_12_30668	5H	125.764	5H	126.93	K	K	H	K	K	K	K	K	K	K	K	K	K	K	K	K	K	K	K	K	K	K	K	K	K	K	K	K	K	K	K	K	K	K	K	K	K	K	K	K	K	K	K	K	K
BOPA2_12_30869	5H	125.764	5H	126.93	K	K	H	K	K	K	K	K	K	K	K	K	K	K	K	K	K	K	K	K	K	K	K	K	K	K	K	K	K	K	K	K	K	K	K	K	K	K	K	K	K	K	K	K	K
BOPA2_12_30930	5H	125.764	5H	126.93	K	K	H	K	K	K	K	K	K	K	K	K	K	K	K	K	K	K	K	K	K	K	K	K	K	K	K	K	K	K	K	K	K	K	K	K	K	K	K	K	K	K	K	K	K
SCRI_RS_229673	5H	125.764	5H	126.93	K	K	M	K	K	K	K	K	K	K	K	K	K	K	K	K	K	K	K	K	K	K	K	K	K	K	K	K	K	K	K	K	K	K	K	K	K	K	K	K	K	K	K	K	K
BOPA1_7523-440	5H	125.833	5H	127.43	K	K	H	K	K	K	K	K	K	K	K	K	K	K	K	K	K	K	K	K	K	K	K	K	K	K	K	K	K	K	K	K	K	K	K	K	K	K	K	K	K	K	K	K	K
BOPA2_12_31237	5H	126.25	5H	127.43	K	K	H	K	K	K	K	K	K	K	K	K	K	K	K	K	K	K	K	K	K	K	K	K	K	K	K	K	K	K	K	K	K	K	K	K	K	K	K	K	K	K	K	K	K
BOPA1_1394-1222	5H	126.806	5H	127.52	K	K	H	K	K	K	K	K	K	K	K	K	K	K	K	K	K	K	K	K	K	K	K	K	K	K	K	K	K	K	K	K	K	K	K	K	K	K	K	K	K	K	K	K	K
SCRI_RS_13320	5H	126.806	5H	127.43	K	K	H	K	K	K	K	K	K	K	K	K	K	K	K	K	K	K	K	K	K	K	K	K	K	K	K	K	K	K	K	K	K	K	K	K	K	K	K	K	K	K	K	K	K
BOPA2_12_30222	5H	126.806	-	-	K	K	K	K	K	K	K	K	K	K	K	K	K	K	K	K	K	K	K	K	K	K	K	K	K	K	K	K	K	K	K	K	K	K	K	K	K	K	K	K	K	K	K	K	K
BOPA2_12_30635	5H	128.194	5H	127.52	K	K	H	K	K	K	K	K	K	K	K	K	K	K	K	K	K	K	K	K	K	K	K	K	K	K	K	K	K	K	K	K	K	K	K	K	K	K	K	K	K	K	K	K	K
SCRI_RS_222984	5H	128.194	5H	127.6	K	K	H	K	K	K	K	K	K	K	K	K	K	K	K	K	K	K	K	K	K	K	K	K	K	K	K	K	K	K	K	K	K	K	K	K	K	K	K	K	K	K	K	K	K
SCRI_RS_228463	5H	128.194	5H	127.6	K	K	H	K	K	K	K	K	K	K	K	K	K	K	K	K	K	K	K	K	K	K	K	K	K	K	K	K	K	K	K	K	K	K	K	K	K	K	K	K	K	K	K	K	K
SCRI_RS_214130	5H	128.542	5H	127.9	K	K	H	K	K	K	K	K	K	K	K	K	K	K	K	K	K	K	K	K	K	K	K	K	K	K	K	K	K	K	K	K	K	K	K	K	K	K	K	K	K	K	K	K	K
SCRI_RS_165578	5H	129.444	5H	130.03	K	K	K	K	K	K	K	K	K	K	K	K	K	K	K	K	K	K	K	K	K	K	K	K	K	K	K	K	K	K	K	K	K	K	K	K	K	K	K	K	K	K	K	K	K
SCRI_RS_175672	5H	129.444	5H	130.03	K	K	K	K	K	K	K	K	K	K	K	K	K	K	K	K	K	K	K	K	K	K	K	K	K	K	K	K	K	K	K	K	K	K	K	K	K	K	K	K	K	K	K	K	K
SCRI_RS_102414	5H	129.444	5H	130.03	K	K	K	K	K	K	K	K	K	K	K	K	K	K	K	K	K	K	K	K	K	K	K	K	K	K	K	K	K	K	K	K	K	K	K	K	K	K	K	K	K	K	K	K	K
SCRI_RS_148120	5H	129.444	5H	130.03	K	K	K	K	K	K	K	K	K	K	K	K	K	K	K	K	K	K	K	K	K	K	K	K	K	K	K	K	K	K	K	K	K	K	K	K	K	K	K	K	K	K	K	K	K
SCRI_RS_196175	5H	129.653	5H	130.33	K	K	K	K	K	K	K	K	K	K	K	K	K	K	K	K	K	K	K	K	K	K	K	K	K	K	K	K	K	K	K	K	K	K	K	K	K	K	K	K	K	K	K	K	K
SCRI_RS_140356	5H	129.653	5H	130.33	K	K	K	K	K	K	K	K	K	K	K	K	K	K	K	K	K	K	K	K	K	K	K	K	K	K	K	K	K	K	K	K	K	K	K	K	K	K	K	K	K	K	K	K	K
SCRI_RS_206956	5H	129.653	5H	130.33	K	K	K	K	K	K	K	K	K	K	K	K	K	K	K	K	K	K	K	K	K	K	K	K	K	K	K	K	K	K	K	K	K	K	K	K	K	K	K	K	K	K	K	K	K
SCRI_RS_210928	5H	130.764	5H	131.43	K	K	K	K	K	K	K	K	K	K	K	K	K	K	K	K	K	K	K	K	K	K	K	K	K	K	K	K	K	K	K	K	K	K	K	K	K	K	K	K	K	K	K	K	K
SCRI_RS_161534	5H	130.764	5H	131.43	K	K	K	K	K	K	K	K	K	K	K	K	K	K	K	K	K	K	K	K	K	K	K	K	K	K	K	K	K	K	K	K	K	K	K	K	K	K	K	K	K	K	K	K	K
SCRI_RS_168534	5H	130.903	5H	131.7	K	K	K	K	K	K	K	K	K	K	K	K	K	K	K	K	K	K	K	K	K	K	K	K	K	K	K	K	K	K	K	K	K	K	K	K	K	K	K	K	K	K	K	K	K
BOPA1_2520-718	5H	131.181	5H	132	K	K	K	K	K	K	K	K	K	K	K	K	K	K	K	K	K	K	K	K	K	K	K	K	K	K	K	K	K	K	K	K	K	K	K	K	K	K	K	K	K	K	K	K	K
BOPA1_447-88	5H	131.181	5H	132	K	K	K	K	K	K	K	K	K	K	K	K	K	K	K	K	K	K	K	K	K	K	K	K	K	K	K	K	K	K	K	K	K	K	K	K	K	K	K	K	K	K	K	K	K
BOPA1_6050-1625	5H	131.181	5H	132	K	K	K	K	K	K	K	K	K	K	K	K	K	K	K	K	K	K	K	K	K	K	K	K	K	K	K	K	K	K	K	K	K	K	K	K	K	K	K	K	K	K	K	K	K
BOPA2_12_30556	5H	131.181	5H	131.97	K	K	K	K	K	K	K	K	K	K	K	K	K	K	K	K	K	K	K	K	K	K	K	K	K	K	K	K	K	K	K	K	K	K	K	K	K	K	K	K	K	K	K	K	K
SCRI_RS_213086	5H	131.597	5H	132.37	K	K	K	K	K	K	K	K	K	K	K	K	K	K	K	K	K	K	K	K	K	K	K	K	K	K	K	K	K	K	K	K	K	K	K	K	K	K	K	K	K	K	K	K	K
SCRI_RS_171042	5H	131.597	-	-	K	K	K	K	K	K	K	K	K	K	K	K	K	K	K	K	K	K	K	K	K	K	K	K	K	K	K	K	K	K	K	K	K	K	K	K	K	K	K	K	K	K	K	K	K
SCRI_RS_206793	5H	131.667	-	-	K	K	K	K	M	K	K	M	M	M	K	K	K	K	K	M	K	K	M	M	K	M	K	M	K	K	M	K	K	K	K	K	K	K	M	K	K	K	M	M	M	M	K	K	K
SCRI_RS_216751	5H	134.722	5H	134.12	K	K	K	K	K	K	K	K	K	K	K	K	K	K	K	K	K	K	K	K	K	K	K	K	K	K	K	K	K	K	K	K	K	K	K	K	K	K	K	K	K	K	K	K	K
SCRI_RS_223157	5H	134.722	5H	134.12	K	K	K	K	K	K	K	K	K	K	K	K	K	K	K	K	K	K	K	K	K	K	K	K	K	K	K	K	K	K	K	K	K	K	K	K	K	K	K	K	K	K	K	K	K
SCRI_RS_25684	5H	135.069	5H	135.22	K	K	K	K	K	K	K	K	K	K	K	K	K	K	K	K	K	K	K	K	K	K	K	K	K	K	K	K	K	K	K	K	K	K	K	K	K	K	K	K	K	K	K	K	K
SCRI_RS_235550	5H	135.069	5H	135.22	K	K	K	K	K	K	K	K	K	K	K	K	K	K	K	K	K	K	K	K	K	K	K	K	K	K	K	K	K	K	K	K	K	K	K	K	K	K	K	K	K	K	K	K	K
SCRI_RS_6203	5H	135.208	5H	135.32	K	K	K	K	K	K	K	K	K	K	K	K	K	K	K	K	K	K	K	K	K	K	K	K	K	K	K	K	K	K	K	K	K	K	K	K	K	K	K	K	K	K	K	K	K
SCRI_RS_188572	5H	135.208	5H	135.32	K	K	K	K	K	K	K	K	K	K	K	K	K	K	K	K	K	K	K	K	K	K	K	K	K	K	K	K	K	K	K	K	K	K	K	K	K	K	K	K	K	K	K	K	K
SCRI_RS_152484	5H	135.208	-	-	K	K	K	K	K	K	K	K	K	K	K	K	K	K	K	K	K	K	K	K	K	K	K	K	K	K	K	K	K	K	K	K	K	K	K	K	K	K	K	K	K	K	K	K	K
SCRI_RS_236610	5H	136.111	5H	136.22	K	K	K	K	K	K	K	K	K	K	K	K	K	K	K	K	K	K	K	K	K	K	K	K	K	K	K	K	K	K	K	K	K	K	K	K	K	K	K	K	K	K	K	K	K
SCRI_RS_225632	5H	136.389	5H	136.52	K	K	K	K	K	K	K	K	K	K	K	K	K	K	K	K	K	K	K	K	K	K	K	K	K	K	K	K	K	K	K	K	K	K	K	K	K	K	K	K	K	K	K	K	K
SCRI_RS_161550	5H	136.806	5H	136.92	K	K	K	K	K	K	K	K	K	K	K	K	K	K	K	K	K	K	K	K	K	K	K	K	K	K	K	K	K	K	K	K	K	K	K	K	K	K	K	K	K	K	K	K	K
SCRI_RS_220146	5H	136.806	-	-	K	K	K	K	K	K	K	K	K	K	K	K	K	K	K	K	K	K	K	K	K	K	K	K	K	K	K	K	K	K	K	K	K	K	K	K	K	K	K	K	K	K	K	K	K
BOPA2_12_30580	5H	137.083	5H	137.22	K	K	K	K	K	K	K	K	K	K	K	K	K	K	K	K	K	K	K	K	K	K	K	K	K	K	K	K	K	K	K	K	K	K	K	K	K	K	K	K	K	K	K	K	K
BOPA1_2611-1846	5H	137.917	5H	137.38	K	K	K	K	K	K	K	K	K	K	K	K	K	K	K	K	K	K	K	K	K	K	K	K	K	K	K	K	K	K	K	K	K	K	K	K	K	K	K	K	K	K	K	K	K
BOPA2_12_31165	5H	137.917	5H	138.44	K	K	K	K	K	K	K	K	K	K	K	K	K	K	K	K	K	K	K	K	K	K	K	K	K	K	K	K	K	K	K	K	K	K	K	K	K	K	K	K	K	K	K	K	K
SCRI_RS_166491	5H	137.917	5H	138.04	K	K	K	K	K	K	K	K	K	K	K	K	K	K	K	K	K	K	K	K	K	K	K	K	K	K	K	K	K	K	K	K	K	K	K	K	K	K	K	K	K	K	K	K	K
SCRI_RS_204797	5H	137.917	5H	138.04	K	K	K	K	K	K	K	K	K	K	K	K	K	K	K	K	K	K	K	K	K	K	K	K	K	K	K	K	K	K	K	K	K	K	K	K	K	K	K	K	K	K	K	K	K
SCRI_RS_227878	5H	137.917	-	-	K	K	K	K	K	K	K	K	K	K	K	K	K	K	K	K	K	K	K	K	K	K	K	K	K	K	K	K	K	K	K	K	K	K	K	K	K	K	K	K	K	K	K	K	K
SCRI_RS_199904	5H	137.917	-	-	K	K	K	K	K	K	K	K	K	K	K	K	K	K	K	K	K	K	K	K	K	K	K	K	K	K	K	K	K	K	K	K	K	K	K	K	K	K	K	K	K	K	K	K	K
BOPA2_12_30062	5H	138.333	5H	138.44	K	K	K	K	K	K	K	K	K	K	K	K	K	K	K	K	K	K	K	K	K	K	K	K	K	K	K	K	K	K	K	K	K	K	K	K	K	K	K	K	K	K	K	K	K
BOPA1_2746-1501	5H	138.542	5H	138.44	K	K	K	K	K	K	K	K	K	K	K	K	K	K	K	K	K	K	K	K	K	K	K	K	W	K	K	K	K	K	K	K	K	K	K	K	K	K	K	K	K	K	K	K	K
SCRI_RS_3287	5H	138.681	5H	138.44	K	K	K	K	K	K	K	K	K	K	K	K	K	K	K	K	K	K	K	K	K	K	K	K	W	K	K	K	K	K	K	K	K	K	K	K	K	K	K	K	K	K	K	K	K
SCRI_RS_207000	5H	138.681	5H	138.44	K	K	K	K	K	K	K	K	K	K	K	K	K	K	K	K	K	K	K	K	K	K	K	K	W	K	K	K	K	K	K	K	K	K	K	K	K	K	K	K	K	K	K	K	K
SCRI_RS_200927	5H	138.681	5H	138.44	K	K	K	K	K	K	K	K	K	K	K	K	K	K	K	K	K	K	K	K	K	K	K	K	W	K	K	K	K	K	K	K	K	K	K	K	K	K	K	K	K	K	K	K	K
SCRI_RS_153322	5H	138.958	5H	138.44	K	K	K	K	K	K	K	K	K	K	K	K	K	K	K	K	K	K	K	K	K	K	K	K	W	K	K	K	K	K	K	K	K	K	K	K	K	K	K	K	K	K	K	K	K
SCRI_RS_187056	5H	138.958	5H	138.44	K	K	K	K	K	K	K	K	K	K	K	K	K	K	K	K	K	K	K	K	K	K	K	K	W	K	K	K	K	K	K	K	K	K	K	K	K	K	K	K	K	K	K	K	K
SCRI_RS_184270	5H	139.097	5H	138.44	K	K	K	K	K	K	K	K	K	K	K	K	K	K	K	K	K	K	K	K	K	K	K	K	W	K	K	K	K	K	K	K	K	K	K	K	K	K	K	K	K	K	K	K	K
SCRI_RS_13262	5H	139.236	5H	143.19	K	K	K	K	K	K	K	K	K	K	K	K	K	K	K	K	K	K	K	K	K	K	K	K	K	K	K	K	K	K	K	K	K	K	K	K	K	K	K	K	K	K	K	K	K
SCRI_RS_161614	5H	139.653	5H	143.69	K	K	K	K	K	K	K	K	K	K	K	K	K	K	K	K	K	K	K	K	K	K	K	K	K	K	K	K	K	K	K	K	K	K	K	K	K	K	K	K	K	K	K	K	K
BOPA1_203-1128	5H	139.931	5H	144.86	K	K	K	K	K	K	K	K	K	K	K	K	K	K	K	K	K	K	K	K	K	K	K	K	K	K	K	K	K	K	K	K	K	K	K	K	K	K	K	K	K	K	K	K	K
BOPA1_4050-2006	5H	139.931	5H	144.86	K	K	K	K	K	K	K	K	K	K	K	K	K	K	K	K	K	K	K	K	K	K	K	K	K	K	K	K	K	K	K	K	K	K	K	K	K	K	K	K	K	K	K	K	K
SCRI_RS_153238	5H	139.931	5H	144.66	K	K	K	K	K	K	K	K	K	K	K	K	K	K	K	K	K	K	K	K	K	K	K	K	K	K	K	K	K	K	K	K	K	K	K	K	K	K	K	K	K	K	K	K	K
SCRI_RS_197361	5H	139.931	5H	144.66	K	K	K	K	K	K	K	K	K	K	K	K	K	K	K	K	K	K	K	K	K	K	K	K	K	K	K	K	K	K	K	K	K	K	K	K	K	K	K	K	K	K	K	K	K
SCRI_RS_12707	5H	139.931	5H	144.66	K	K	K	K	K	K	K	K	K	K	K	K	K	K	K	K	K	K	K	K	K	K	K	K	K	K	K	K	K	K	K	K	K	K	K	K	K	K	K	K	K	K	K	K	K
SCRI_RS_182353	5H	140.069	5H	144.86	K	K	K	K	K	K	K	K	K	K	K	K	K	K	K	K	K	K	K	K	K	K	K	K	K	K	K	K	K	K	K	K	K	K	K	K	K	K	K	K	K	K	K	K	K
SCRI_RS_205647	5H	140.069	5H	144.86	K	K	K	W	K	K	K	K	K	K	K	K	K	K	K	K	K	K	K	K	K	K	K	K	K	K	K	K	K	K	K	K	K	K	K	K	K	K	K	K	K	K	K	K	K
SCRI_RS_44795	5H	140.139	5H	144.86	K	K	K	W	K	K	K	K	K	K	K	K	K	K	K	K	K	K	K	K	K	K	K	K	K	K	K	K	K	K	K	K	K	K	K	K	K	K	K	K	K	K	K	K	K
BOPA1_ConsensusGBS0451-1	5H	142.014	5H	147.7	K	K	K	K	K	K	K	K	K	K	K	K	K	K	K	K	K	K	K	K	K	K	K	K	K	K	K	K	K	K	K	K	K	K	K	K	K	K	K	K	K	K	K	K	K
SCRI_RS_3429	5H	142.014	5H	147.7	K	K	K	K	K	K	K	K	K	K	K	K	K	K	K	K	K	K	K	K	K	K	K	K	K	K	K	K	K	K	K	K	K	K	K	K	K	K	K	K	K	K	K	K	K
BOPA2_12_31221	5H	142.014	5H	142.71	K	K	K	K	K	K	K	K	K	K	K	K	K	K	K	K	K	K	K	K	K	K	K	K	K	K	K	K	K	K	K	K	K	K	K	K	K	K	K	K	K	K	K	K	K
SCRI_RS_189369	5H	142.014	-	-	K	K	K	K	K	K	K	K	K	K	K	K	K	K	K	K	K	K	K	K	K	K	K	K	K	K	K	K	K	K	K	K	K	K	K	K	K	K	K	K	K	K	K	K	K
SCRI_RS_7678	5H	142.014	-	-	K	K	K	K	K	K	K	K	K	K	K	K	K	K	K	K	K	K	K	K	K	K	K	K	K	K	K	K	K	K	K	K	K	K	K	K	K	K	K	K	K	K	K	K	K
SCRI_RS_32778	5H	143.125	5H	149.21	K	K	K	K	K	K	K	K	K	K	K	K	K	K	K	K	K	K	K	K	K	K	K	K	K	K	K	K	K	K	K	K	K	K	K	K	K	K	K	K	K	K	K	K	K
BOPA1_6054-1050	5H	143.403	5H	149.41	K	K	K	K	K	K	K	K	K	K	K	K	K	K	K	K	K	K	K	K	K	K	K	K	K	K	K	M	M	K	K	K	K	K	M	K	M	K	K	K	K	K	K	M	K
BOPA1_603-72	5H	143.542	5H	149.41	K	K	K	K	K	K	K	K	K	K	K	K	K	K	K	K	K	K	K	K	K	K	K	K	K	K	K	K	K	K	K	K	K	K	K	K	K	K	K	K	K	K	K	K	K
SCRI_RS_226862	5H	143.542	5H	149.41	K	K	K	K	K	K	K	K	K	K	K	K	K	K	K	K	K	K	K	K	K	K	K	K	K	K	K	K	K	K	K	K	K	K	K	K	K	K	K	K	K	K	K	K	K
SCRI_RS_239368	5H	143.542	5H	149.41	K	K	K	K	K	K	K	K	K	K	K	K	K	K	K	K	K	K	K	K	K	K	K	K	K	K	K	K	K	K	K	K	K	K	K	K	K	K	K	K	K	K	K	K	K
SCRI_RS_173583	5H	143.681	5H	149.41	K	K	K	K	K	K	K	K	K	K	K	K	K	K	K	K	K	K	K	K	K	K	K	K	K	K	K	K	K	K	K	K	K	K	K	K	K	K	K	K	K	K	K	K	K
SCRI_RS_143947	5H	143.819	-	-	K	K	K	K	K	K	K	K	K	K	K	K	K	K	K	K	K	K	K	K	K	K	K	K	K	K	K	K	K	K	K	K	K	K	K	K	K	K	K	K	K	K	K	K	K
BOPA1_3390-205	5H	143.958	5H	149.41	K	K	K	K	K	K	K	K	K	K	K	K	K	K	K	K	K	K	K	K	K	K	K	K	K	K	K	K	K	K	K	K	K	K	K	K	K	K	K	K	K	K	K	K	K
SCRI_RS_107772	5H	143.958	-	-	K	K	K	K	K	K	K	K	K	K	K	K	K	K	K	K	K	K	K	K	K	K	K	K	K	K	K	K	K	K	K	K	K	K	K	K	K	K	K	K	K	K	K	K	K
SCRI_RS_14455	5H	143.958	-	-	K	K	K	K	K	K	K	K	K	K	K	K	K	K	K	K	K	K	K	K	K	K	K	K	K	K	K	K	K	K	K	K	K	K	K	K	K	K	K	K	K	K	K	K	K
SCRI_RS_194155	5H	144.236	5H	149.41	K	K	K	K	K	K	K	K	K	K	K	K	K	K	K	K	K	K	K	K	K	K	K	K	K	K	K	K	K	K	K	K	K	K	K	K	K	K	K	K	K	K	K	K	K
BOPA1_3759-1385	5H	144.514	5H	149.41	K	K	K	K	K	K	K	K	K	K	K	K	K	K	K	K	K	K	K	K	K	K	K	K	K	K	K	K	K	K	K	K	K	K	K	K	K	K	K	K	K	K	K	K	K
BOPA1_2867-373	5H	144.653	5H	149.41	K	K	K	K	K	K	K	K	K	K	K	K	K	K	K	K	K	K	K	K	K	K	K	K	K	K	K	K	K	K	K	K	K	K	K	K	K	K	K	K	K	K	K	K	K
BOPA1_5163-896	5H	144.653	5H	149.41	K	K	K	K	K	K	K	K	K	K	K	K	K	K	K	K	K	K	K	K	K	K	K	K	K	K	K	K	K	K	K	K	K	K	K	K	K	K	K	K	K	K	K	K	K
BOPA1_9864-225	5H	144.653	5H	149.41	K	K	K	K	K	K	K	K	K	K	K	K	K	K	K	K	K	K	K	K	K	K	K	K	K	K	K	K	K	K	K	K	K	K	K	K	K	K	K	K	K	K	K	K	K
SCRI_RS_14527	5H	144.653	5H	149.41	K	K	K	K	K	K	K	K	K	K	K	K	K	K	K	K	K	K	K	K	K	K	K	K	K	K	K	K	K	K	K	K	K	K	K	K	K	K	K	K	K	K	K	K	K
BOPA1_11470-478	5H	144.931	5H	149.41	K	K	K	K	K	K	K	K	K	K	K	K	K	K	K	K	K	K	K	K	K	K	K	K	K	K	K	K	K	K	K	K	K	K	K	K	K	K	K	K	K	K	K	K	K
BOPA1_4015-1153	5H	144.931	5H	149.41	K	K	K	K	K	K	K	K	K	K	K	K	K	K	K	K	K	K	K	K	K	K	K	K	K	K	K	K	K	K	K	K	K	K	K	K	K	K	K	K	K	K	K	K	K
SCRI_RS_235092	5H	144.931	5H	149.41	K	K	K	K	K	K	K	K	K	K	K	K	K	K	K	K	K	K	K	K	K	K	K	K	K	K	K	K	K	K	K	K	K	K	K	K	K	K	K	K	K	K	K	K	K
SCRI_RS_213163	5H	144.931	5H	149.41	K	K	K	K	K	K	K	K	K	K	K	K	K	K	K	K	K	K	K	K	K	K	K	K	K	K	K	K	K	K	K	K	K	K	K	K	K	K	K	K	K	K	K	K	K
SCRI_RS_19741	5H	145.694	5H	149.41	K	K	K	K	K	K	K	K	K	K	K	K	K	K	K	K	K	K	K	K	K	K	K	K	K	K	K	K	K	K	K	K	K	K	K	K	K	K	K	K	K	K	K	K	K
BOPA2_12_30165	5H	145.833	5H	149.41	K	K	K	K	K	K	K	K	K	K	K	K	K	K	K	K	K	K	K	K	K	K	K	K	K	K	K	K	K	K	K	K	K	K	K	K	K	K	K	K	K	K	K	K	K
SCRI_RS_189174	5H	146.111	5H	150.1	K	K	K	K	K	K	K	K	K	K	K	K	K	K	K	K	K	K	K	K	K	K	K	K	K	K	K	K	K	K	K	K	K	K	K	K	K	K	K	K	K	K	K	K	K
SCRI_RS_205722	5H	146.111	-	-	K	K	K	K	K	K	K	K	K	K	K	K	K	K	K	K	K	K	K	K	K	K	K	K	K	K	K	K	K	K	K	K	K	K	K	K	K	K	K	K	K	K	K	K	K
SCRI_RS_237478	5H	146.111	-	-	K	K	K	K	K	K	K	K	K	K	K	K	K	K	K	K	K	K	K	K	K	K	K	K	K	K	K	K	K	K	K	K	K	K	K	K	K	K	K	K	K	K	K	K	K
SCRI_RS_180871	5H	146.111	-	-	K	K	K	K	M	M	K	M	M	K	M	K	K	K	K	M	K	K	M	K	K	K	K	K	K	K	K	K	K	K	K	K	M	K	K	K	K	K	K	K	M	K	K	K	M
SCRI_RS_216071	5H	146.111	-	-	K	K	K	K	K	K	K	K	K	K	K	K	K	K	K	K	K	K	K	K	K	K	K	K	K	K	K	K	K	K	K	K	K	K	K	K	K	K	K	K	K	K	K	K	K
SCRI_RS_122949	5H	146.111	-	-	K	K	K	K	K	K	K	K	K	K	K	K	K	K	K	K	K	K	K	K	K	K	K	K	K	K	K	K	K	K	K	K	K	K	K	K	K	K	K	K	K	K	K	K	K
SCRI_RS_199888	5H	146.111	-	-	K	K	K	K	K	K	K	K	K	K	K	K	K	K	K	K	K	K	K	K	K	K	K	K	K	K	K	K	K	K	K	K	K	K	K	K	K	K	K	K	K	K	K	K	K
SCRI_RS_146309	5H	146.111	-	-	K	K	K	K	K	K	K	K	K	K	K	K	K	K	K	K	K	K	K	K	K	K	K	K	K	K	K	K	K	K	K	K	K	K	K	K	K	K	K	K	K	K	K	K	K
SCRI_RS_173935	5H	149.028	5H	153.37	K	K	K	K	K	K	K	K	K	K	K	K	K	K	K	K	K	K	K	K	K	K	K	K	K	K	K	K	K	K	K	K	K	K	K	K	K	K	K	K	K	K	K	K	K
SCRI_RS_181521	5H	149.028	5H	153.37	K	K	K	K	K	K	K	K	K	K	K	K	K	K	K	K	K	K	K	K	K	K	K	K	K	K	K	K	K	K	K	K	K	K	K	K	K	K	K	K	K	K	K	K	K
SCRI_RS_214011	5H	149.097	5H	153.47	K	K	K	K	K	K	K	K	K	K	K	K	K	K	K	K	K	K	K	K	K	K	K	K	K	K	K	K	K	K	K	K	K	K	K	M	K	K	K	K	K	K	K	K	K
SCRI_RS_181059	5H	149.375	5H	153.77	K	K	K	K	K	K	K	K	K	K	K	K	K	K	K	K	K	K	K	K	K	K	K	K	K	K	K	K	K	K	K	K	K	K	K	K	K	K	K	K	K	K	K	K	K
SCRI_RS_151716	5H	149.375	5H	153.77	K	K	K	K	K	K	K	K	K	K	K	K	K	K	K	K	K	K	K	K	K	K	K	K	K	K	K	K	K	K	K	K	K	K	K	K	K	K	K	K	K	K	K	K	K
SCRI_RS_168091	5H	149.375	5H	153.77	K	K	K	K	K	K	K	K	K	K	K	K	K	K	K	K	K	K	K	K	K	K	K	K	K	K	K	K	K	K	K	K	K	K	K	K	K	K	K	K	K	K	K	K	K
SCRI_RS_175560	5H	149.792	5H	156.7	K	K	K	K	K	K	K	K	K	K	K	K	K	K	K	K	K	K	K	K	K	K	K	K	K	K	K	K	K	K	K	K	K	K	K	K	K	K	K	K	K	K	K	K	K
SCRI_RS_1458	5H	149.792	5H	156.7	K	K	K	K	K	K	K	K	K	K	K	K	K	K	K	K	K	K	K	K	K	K	K	K	K	K	K	K	K	K	K	K	K	K	K	K	K	K	K	K	K	K	K	K	K
BOPA1_2290-796	5H	150.278	5H	156.7	K	K	K	K	K	K	K	K	K	K	K	K	K	K	K	K	K	K	K	K	K	K	K	K	K	K	K	K	K	K	K	K	K	K	K	K	K	K	K	K	K	K	K	K	K
SCRI_RS_10924	5H	151.25	5H	158.18	K	K	K	K	K	K	K	K	K	K	K	K	K	K	K	K	K	K	K	K	K	K	K	K	K	K	K	K	K	K	K	K	K	K	K	K	K	K	K	K	K	K	K	K	K
BOPA1_4845-123	5H	151.667	5H	161.41	K	K	K	K	K	K	K	K	K	K	K	K	K	K	K	K	K	K	K	K	K	K	K	K	K	K	K	K	K	K	K	K	K	K	K	K	K	K	K	K	K	K	K	K	K
SCRI_RS_132308	5H	152.361	5H	162.37	K	K	K	K	K	K	K	K	K	K	K	K	K	K	K	K	K	K	K	K	K	K	K	K	K	K	K	K	K	K	K	K	K	K	K	K	K	K	K	K	K	K	K	K	K
SCRI_RS_726	5H	152.361	5H	162.37	K	K	K	K	K	K	K	K	K	K	K	K	K	K	K	K	K	K	K	K	K	K	K	K	K	K	K	K	K	K	K	K	K	K	K	K	K	K	K	K	K	K	K	K	K
BOPA1_2223-1688	5H	152.361	-	-	K	K	K	K	K	K	K	K	K	K	K	K	K	K	K	K	K	K	K	K	K	K	K	K	K	K	K	K	K	K	K	K	K	K	K	K	K	K	K	K	K	K	K	K	K
SCRI_RS_214021	5H	152.361	-	-	K	K	K	K	K	K	K	K	K	K	K	K	K	K	K	K	K	K	K	K	K	K	K	K	K	K	K	K	K	K	K	K	K	K	K	K	K	K	K	K	K	K	K	K	K
SCRI_RS_196483	5H	152.361	-	-	K	K	K	K	K	K	K	K	K	K	K	K	K	K	K	K	K	K	K	K	K	K	K	K	K	K	K	K	K	K	K	K	K	K	K	K	K	K	K	K	K	K	K	K	K
SCRI_RS_171	5H	152.361	-	-	K	K	K	K	K	K	K	K	K	K	K	K	K	K	K	K	K	K	K	K	K	K	K	K	K	K	K	K	K	K	K	K	K	K	K	K	K	K	K	K	K	K	K	K	K
SCRI_RS_218503	5H	152.569	5H	162.57	K	K	K	K	K	K	K	K	K	K	K	K	K	K	K	K	K	K	K	K	K	K	K	K	K	K	K	K	K	K	K	K	K	K	K	K	K	K	K	K	K	K	K	K	K
SCRI_RS_123668	5H	152.569	5H	162.57	K	K	K	K	K	K	K	K	K	K	K	K	K	K	K	K	K	K	K	K	K	K	K	K	K	K	K	K	K	K	K	K	K	K	K	K	K	K	K	K	K	K	K	K	K
SCRI_RS_159467	5H	154.514	5H	164.47	K	K	K	K	K	K	K	K	K	K	K	K	K	K	K	K	K	K	K	K	K	K	K	K	K	K	K	K	K	K	K	K	K	K	K	K	K	K	K	K	K	K	K	K	K
SCRI_RS_186008	5H	154.514	-	-	K	K	K	K	K	K	K	K	K	K	K	K	K	K	K	K	K	K	K	K	K	K	K	K	K	K	K	K	K	K	K	K	K	K	K	K	K	K	K	K	K	K	K	K	K
SCRI_RS_199694	5H	155.417	5H	165.37	K	K	K	K	K	K	K	K	K	K	K	K	K	K	K	K	K	K	K	K	K	K	K	K	K	K	K	K	K	K	K	K	K	K	K	K	K	K	K	K	K	K	K	K	K
BOPA1_552-188	5H	155.625	5H	165.57	K	K	K	K	K	K	K	K	K	K	K	K	K	K	K	K	K	K	K	K	K	K	K	K	K	K	K	K	K	K	K	K	K	K	K	K	K	K	K	K	K	K	K	K	K
BOPA1_3391-2137	5H	155.764	5H	161.41	K	K	K	K	K	K	K	K	K	K	K	K	K	K	K	K	K	K	K	K	K	K	K	K	K	K	K	K	K	K	K	K	K	K	K	K	K	K	K	K	K	K	K	K	K
SCRI_RS_140499	5H	157.361	-	-	K	K	K	K	K	K	K	K	K	K	K	K	K	K	K	K	K	K	K	K	K	K	K	K	K	K	K	K	K	K	K	K	K	K	K	K	K	K	K	K	K	K	K	K	K
SCRI_RS_168188	5H	157.361	-	-	K	K	K	K	K	K	K	K	K	K	K	K	K	K	K	K	K	K	K	K	K	K	K	K	K	K	K	K	K	K	K	K	K	K	K	K	K	K	K	K	K	K	K	K	K
SCRI_RS_169845	5H	157.361	-	-	K	K	K	K	K	K	K	K	K	K	K	K	K	K	K	K	K	K	K	K	K	K	K	K	K	K	K	K	K	K	K	K	K	K	K	K	K	K	K	K	K	K	K	K	K
SCRI_RS_173687	5H	157.361	-	-	K	K	K	K	K	K	K	K	K	K	K	K	K	K	K	K	K	K	K	K	K	K	K	K	K	K	K	K	K	K	K	K	K	K	K	K	K	K	K	K	K	K	K	K	K
BOPA2_12_31239	5H	157.847	-	-	K	K	K	K	K	K	K	K	K	K	K	K	K	K	K	K	K	K	K	K	K	K	K	K	K	K	K	K	K	K	K	K	K	K	K	K	K	K	K	K	K	K	K	K	K
BOPA1_6761-490	5H	159.792	5H	169.97	K	K	K	K	K	K	K	K	K	K	K	K	K	K	K	K	K	K	K	K	K	K	K	K	K	K	K	K	K	K	K	K	K	K	K	K	K	K	K	K	K	K	K	K	K
SCRI_RS_186984	5H	159.792	5H	169.97	K	K	K	K	K	K	K	K	K	K	K	K	K	K	K	K	K	K	K	K	K	K	K	K	K	K	K	K	K	K	K	K	K	K	K	K	K	K	K	K	K	K	K	K	K
SCRI_RS_141634	5H	159.792	5H	169.97	K	K	K	K	K	K	K	K	K	K	K	K	K	K	K	K	K	K	K	K	K	K	K	K	K	K	K	K	K	K	K	K	K	K	K	K	K	K	K	K	K	K	K	K	K
SCRI_RS_8410	5H	159.792	5H	169.97	K	K	K	K	K	K	K	K	K	K	K	K	K	K	K	K	K	K	K	K	K	K	K	K	K	K	K	K	K	K	K	K	K	K	K	K	K	K	K	K	K	K	K	K	K
SCRI_RS_160831	5H	159.931	5H	170.07	K	K	K	K	K	K	K	K	K	K	K	K	K	K	K	K	K	K	K	K	K	K	K	K	K	K	K	K	K	K	K	K	K	K	K	K	K	K	K	K	K	K	K	K	K
SCRI_RS_131163	5H	160.486	5H	170.66	K	K	K	K	K	K	K	K	K	K	K	K	K	K	K	K	K	K	K	K	K	K	K	K	K	K	K	K	K	K	K	K	K	K	K	K	K	K	K	K	K	K	K	K	K
SCRI_RS_154756	5H	160.486	5H	170.66	K	K	K	K	K	K	K	K	K	K	K	K	K	K	K	K	K	K	K	K	K	K	K	K	K	K	K	K	K	K	K	K	K	K	K	K	K	K	K	K	K	K	K	K	K
SCRI_RS_240083	5H	160.694	5H	170.86	K	K	K	K	K	K	K	K	K	K	K	K	K	K	K	K	K	K	K	K	K	K	K	K	K	K	K	K	K	K	K	K	K	K	K	K	K	K	K	K	K	K	K	K	K
BOPA2_12_30494	5H	161.528	5H	171.16	K	K	K	K	K	K	K	K	K	K	K	K	K	K	K	K	K	K	K	K	K	K	K	K	K	K	K	K	K	K	K	K	K	K	K	K	K	K	K	K	K	K	K	K	K
BOPA1_2144-852	5H	161.667	5H	172.23	K	K	K	K	K	K	K	K	K	K	K	K	K	K	K	K	K	K	K	K	K	K	K	K	K	K	K	K	K	K	K	K	K	K	K	K	K	K	K	K	K	K	K	K	K
SCRI_RS_167103	5H	161.667	5H	172.13	K	K	K	K	K	K	K	K	K	K	K	K	K	K	K	K	K	K	K	K	K	K	K	K	K	K	K	K	K	K	K	K	K	K	K	K	K	K	K	K	K	K	K	K	K
BOPA1_10386-329	5H	162.5	5H	172.23	K	K	K	K	K	K	K	W	K	K	K	K	K	K	K	K	K	K	K	K	K	K	K	K	K	K	K	K	K	K	K	K	K	K	K	K	K	K	K	K	K	K	K	K	K
BOPA2_12_30769	5H	162.5	5H	172.25	M	M	K	K	K	M	M	W	K	K	K	M	K	K	K	K	K	K	K	K	K	K	K	K	K	M	K	K	M	M	M	M	K	M	K	M	K	K	K	K	K	K	K	M	K
SCRI_RS_207299	5H	162.5	-	-	K	K	K	K	K	K	K	W	K	K	K	K	K	K	K	K	K	K	K	K	K	K	K	K	K	K	K	K	K	K	K	K	K	K	K	K	K	K	K	K	K	K	K	K	K
SCRI_RS_194125	5H	165.833	5H	176.52	K	K	K	K	K	K	K	W	K	K	K	K	K	K	K	K	K	K	K	K	K	K	K	K	K	K	K	K	K	K	K	K	K	K	K	K	K	K	K	K	K	K	K	K	K
SCRI_RS_216726	5H	165.972	5H	176.73	K	K	K	K	K	K	K	W	K	K	K	K	K	K	K	K	K	K	K	K	K	K	K	K	K	K	K	K	K	K	K	K	K	K	K	K	K	K	K	K	K	K	K	K	K
SCRI_RS_206768	5H	166.667	5H	177.43	K	K	K	K	K	K	K	W	K	K	K	K	K	K	K	K	K	K	K	K	K	K	K	K	K	K	K	K	K	K	K	K	K	K	K	K	K	K	K	K	K	K	K	K	K
SCRI_RS_167850	5H	167.222	5H	179.17	K	K	K	K	K	K	K	W	K	K	K	K	K	K	K	K	K	K	K	K	K	K	K	K	K	K	K	K	K	K	K	K	K	K	K	K	K	K	K	K	K	K	K	K	K
SCRI_RS_14608	5H	167.917	5H	179.87	K	K	K	K	K	K	K	W	K	K	K	K	K	K	K	K	K	K	K	K	K	K	K	K	K	K	K	K	K	K	K	K	K	K	K	K	K	K	K	K	K	K	K	K	K
SCRI_RS_136415	5H	167.917	-	-	K	K	K	K	K	K	K	W	K	K	K	K	K	K	K	K	K	K	K	K	K	K	K	K	K	K	K	K	K	K	K	K	K	K	K	K	K	K	K	K	K	K	K	K	K
BOPA1_2978-938	5H	168.125	5H	180.54	K	K	K	K	K	K	K	W	K	K	K	K	K	K	K	K	K	K	K	K	K	K	K	K	K	K	K	K	K	K	K	K	K	K	K	K	K	K	K	K	K	K	K	K	K
BOPA2_12_11413	5H	168.542	5H	180.54	K	K	K	K	K	K	K	W	K	K	K	K	K	K	K	K	K	K	K	K	K	K	K	K	K	K	K	K	K	K	K	K	K	K	K	K	K	K	K	K	K	K	K	K	K
BOPA2_12_30360	5H	168.542	5H	180.54	K	K	K	K	K	K	K	W	K	K	K	K	K	K	K	K	K	K	K	K	K	K	K	K	K	K	K	K	K	K	K	K	K	K	K	K	K	K	K	K	K	K	K	K	K
SCRI_RS_105868	5H	168.542	5H	180.54	K	K	K	K	K	K	K	W	K	K	K	K	K	K	K	K	K	K	K	K	K	K	K	K	K	K	K	K	K	K	K	K	K	K	K	K	K	K	K	K	K	K	K	K	K
SCRI_RS_12519	5H	168.75	5H	180.84	K	K	K	K	K	K	K	W	K	K	K	K	K	K	K	K	K	K	K	K	K	K	K	K	K	K	K	K	K	K	K	K	K	K	K	K	K	K	K	K	K	K	K	K	K
SCRI_RS_219619	5H	168.75	5H	180.84	K	K	K	K	K	K	K	W	K	K	K	K	K	K	K	K	K	K	K	K	K	K	K	K	K	K	K	K	K	K	K	K	K	K	K	K	K	K	K	K	K	K	K	K	K
SCRI_RS_10702	5H	169.375	5H	184.75	K	K	K	K	K	K	K	W	K	K	K	K	K	K	K	K	K	K	K	K	K	K	K	K	K	K	K	K	K	K	K	K	K	K	K	K	K	K	K	K	K	K	K	K	K
SCRI_RS_207382	5H	169.375	5H	184.75	K	K	K	K	K	K	K	W	K	K	K	K	K	K	K	K	K	K	K	K	K	K	K	K	K	K	K	K	K	K	K	K	K	K	K	K	K	K	K	K	K	K	K	K	K
BOPA2_12_10857	5H	169.653	5H	180.54	K	K	K	K	K	K	K	W	K	K	K	K	K	K	K	K	K	K	K	K	K	K	K	K	K	K	K	K	K	K	K	K	K	K	K	K	K	K	K	K	K	K	K	K	K
SCRI_RS_168487	6H	0.283286	6H	0.3	K	K	K	K	K	K	K	K	K	K	K	K	K	K	K	K	K	K	K	K	K	K	K	K	K	K	K	K	K	K	W	K	K	K	K	K	K	K	K	K	K	K	K	K	K
BOPA1_3178-1276	6H	0.495751	6H	0.5	K	K	K	K	K	K	K	K	K	K	K	K	K	K	K	K	K	K	K	K	K	K	K	K	K	K	K	K	K	K	W	K	K	K	K	K	K	K	K	K	K	K	K	K	K
BOPA1_5159-579	6H	1.41643	6H	1.4	K	K	K	K	K	K	K	K	K	K	K	K	K	K	K	K	K	K	K	K	K	K	K	K	K	K	K	K	K	K	W	K	K	K	K	K	K	K	K	K	K	K	K	K	K
SCRI_RS_167505	6H	1.84136	6H	1.8	K	K	K	K	K	K	K	K	K	K	K	K	K	K	K	K	K	K	K	K	K	K	K	K	K	K	K	K	K	K	W	K	K	K	K	K	K	K	K	K	K	K	K	K	K
SCRI_RS_106920	6H	1.84136	-	-	K	K	K	K	K	K	K	K	K	K	K	K	K	K	K	K	K	K	K	K	K	K	K	K	K	K	K	K	K	K	K	K	K	K	K	K	K	K	K	K	K	K	K	K	K
BOPA1_1553-753	6H	2.6204	6H	4.71	K	K	K	K	K	K	K	K	K	K	K	K	K	K	K	K	K	K	K	K	K	K	K	K	K	K	K	K	K	K	W	K	K	K	K	K	K	K	K	K	K	K	K	K	K
SCRI_RS_194048	6H	3.39943	6H	2.87	K	K	K	K	K	K	K	K	K	K	K	K	K	K	K	K	K	K	K	K	K	K	K	K	K	K	K	K	K	K	W	K	K	K	K	K	K	K	K	K	K	K	K	K	K
SCRI_RS_8388	6H	4.81586	6H	4.27	K	K	K	K	K	K	K	K	K	K	K	K	K	K	K	K	K	K	K	K	K	K	K	K	K	K	K	K	K	K	W	K	K	K	K	K	K	K	K	K	K	K	K	K	K
BOPA1_4547-1677	6H	4.81586	6H	3.43	K	K	K	K	K	K	K	K	K	K	K	K	K	K	K	K	K	K	K	K	K	K	K	K	K	K	K	K	K	K	W	K	K	K	K	K	K	K	K	K	K	K	K	K	K
SCRI_RS_56	6H	4.95751	6H	4.47	K	K	K	K	K	K	K	K	K	K	K	K	K	K	K	K	K	K	K	K	K	K	K	K	K	K	K	K	K	K	W	K	K	K	K	K	K	K	K	K	K	K	K	K	K
SCRI_RS_153928	6H	4.95751	6H	4.47	K	K	K	K	K	K	K	K	K	K	K	K	K	K	K	K	K	K	K	K	K	K	K	K	K	K	K	K	K	K	W	K	K	K	K	K	K	K	K	K	K	K	K	K	K
SCRI_RS_211856	6H	6.44476	6H	5.87	K	K	K	K	K	K	K	K	K	K	K	K	K	K	K	K	K	K	K	K	K	K	K	K	K	K	K	K	K	K	W	K	K	K	K	K	K	K	K	K	K	K	K	K	K
BOPA1_2057-412	6H	7.15297	6H	6.49	K	K	K	K	K	K	K	K	K	K	K	K	K	K	K	K	K	K	K	K	K	K	K	K	K	K	K	K	K	K	W	K	K	K	K	K	K	K	K	K	K	K	K	K	K
BOPA1_7185-370	6H	8.56941	6H	7.56	K	K	K	K	K	K	K	K	K	K	K	K	K	K	K	K	K	K	K	K	K	K	K	K	K	K	K	K	K	K	W	K	K	K	K	K	K	K	K	K	K	K	K	K	K
BOPA2_12_30651	6H	8.56941	6H	5.44	K	K	K	K	K	K	K	K	K	K	K	K	K	K	K	K	K	K	K	K	K	K	K	K	K	K	K	K	K	K	W	K	K	K	K	K	K	K	K	K	K	K	K	K	K
SCRI_RS_194036	6H	8.56941	-	-	K	K	K	K	K	K	K	K	K	K	K	K	K	K	K	K	K	K	K	K	K	K	K	K	K	K	K	K	K	K	W	K	K	K	K	K	K	K	K	K	K	K	K	K	K
SCRI_RS_1429	6H	10.1275	6H	9.59	K	K	K	K	K	K	K	K	K	K	K	K	K	K	K	K	K	K	K	K	K	K	K	K	K	K	K	K	K	K	W	K	K	K	K	K	K	K	K	K	K	K	K	K	K
SCRI_RS_123172	6H	10.1275	-	-	K	K	K	K	K	K	K	K	K	K	K	K	K	K	K	K	K	K	K	K	K	K	K	K	K	K	K	K	K	K	W	K	K	K	K	K	K	K	K	K	K	K	K	K	K
SCRI_RS_202485	6H	10.4108	6H	9.89	K	K	K	K	K	K	K	K	K	K	K	K	K	K	K	K	K	K	K	K	K	K	K	K	K	K	K	K	K	K	W	K	K	K	K	K	K	K	K	K	K	K	K	K	K
SCRI_RS_206183	6H	10.8357	6H	10.29	K	K	K	K	K	K	K	K	K	K	K	K	K	K	K	K	K	K	K	K	K	K	K	K	K	K	K	K	K	K	W	K	K	K	K	K	K	K	K	K	K	K	K	K	K
SCRI_RS_231003	6H	11.119	6H	10.59	K	K	K	K	K	K	K	K	K	K	K	K	K	K	K	K	K	K	K	K	K	K	K	K	K	K	K	K	K	K	W	K	K	K	K	K	K	K	K	K	K	K	K	K	K
SCRI_RS_159124	6H	11.2606	6H	10.79	K	K	K	K	K	K	K	K	K	K	K	K	K	K	K	K	K	K	K	K	K	K	K	K	K	K	K	K	K	K	W	K	K	K	K	K	K	K	K	K	K	K	K	K	K
SCRI_RS_164308	6H	13.5269	6H	12.99	K	K	K	K	K	M	K	K	K	M	K	K	M	K	K	K	K	K	K	K	K	K	K	K	M	K	K	M	K	K	K	K	K	M	K	K	K	K	K	K	M	K	K	K	K
BOPA1_ConsensusGBS0346-1	6H	13.6686	6H	14.26	K	K	K	K	K	K	K	K	K	K	K	K	K	K	K	K	K	K	K	K	K	K	K	K	K	K	K	K	K	K	K	K	K	K	K	K	K	K	K	K	K	K	K	K	K
SCRI_RS_146663	6H	13.6686	6H	14.26	K	K	K	K	K	K	K	K	K	K	K	K	K	K	K	K	K	K	K	K	K	K	K	K	K	K	K	K	K	K	K	K	K	K	K	K	K	K	K	K	K	K	K	K	K
BOPA1_2795-1707	6H	15.1558	6H	15.16	K	K	K	K	K	K	K	K	K	K	K	K	K	K	K	K	K	K	K	K	K	K	K	K	K	K	K	K	K	K	K	K	K	K	K	K	K	K	K	K	K	K	K	K	K
SCRI_RS_62666	6H	15.1558	-	-	K	K	K	K	K	K	K	K	K	K	K	K	K	K	K	K	K	K	K	K	K	K	K	K	K	K	K	K	K	K	K	K	K	K	K	W	K	K	K	K	K	K	K	K	K
SCRI_RS_129888	6H	15.7224	6H	16.26	K	K	K	K	K	K	K	K	K	K	K	K	K	K	K	K	K	K	K	K	K	K	K	K	K	K	K	K	K	K	K	K	K	K	K	K	K	K	K	K	K	K	K	K	K
BOPA1_1066-2110	6H	16.0057	6H	20.36	K	K	K	K	K	K	K	K	K	K	K	K	K	K	K	K	K	K	K	K	K	K	K	K	K	K	K	K	K	K	K	K	K	K	K	W	K	K	K	K	K	K	K	K	K
BOPA2_12_30843	6H	16.0057	6H	23.07	K	K	K	K	K	K	K	K	K	K	K	K	K	K	K	K	K	K	K	K	K	K	K	K	K	K	K	K	K	K	K	K	K	K	K	W	K	K	K	K	K	K	K	K	K
SCRI_RS_183580	6H	16.0057	-	-	K	K	K	K	K	K	K	K	K	K	K	K	K	K	K	K	K	K	K	K	K	K	K	K	K	K	K	K	K	K	K	K	K	K	K	W	K	K	K	K	K	K	K	K	K
BOPA1_2188-425	6H	24.3626	6H	25.77	K	K	K	K	K	W	K	K	K	K	K	K	K	K	K	K	K	K	K	K	K	K	K	K	K	K	K	K	K	K	K	K	K	K	K	W	K	K	K	K	K	K	K	K	K
SCRI_RS_138556	6H	24.5042	6H	27.19	K	K	K	K	K	W	K	K	K	K	K	K	K	K	K	K	K	K	K	K	K	K	K	K	K	K	K	K	K	K	K	K	K	K	K	W	K	K	K	K	K	K	K	K	K
SCRI_RS_231372	6H	24.6459	6H	27.29	K	K	K	K	K	W	K	K	K	K	K	K	K	K	K	K	K	K	K	K	K	K	K	K	K	K	K	K	K	K	K	K	K	K	K	W	K	K	K	K	K	K	K	K	K
SCRI_RS_222092	6H	28.3286	6H	30.99	K	K	K	K	K	K	K	K	K	K	K	K	K	K	K	K	K	K	K	K	K	K	K	K	K	K	K	K	K	K	K	K	K	K	K	W	K	K	K	K	K	K	K	K	K
SCRI_RS_189878	6H	28.5411	6H	31.19	K	K	K	K	K	K	K	K	K	K	K	K	K	K	K	K	K	K	K	K	K	K	K	K	K	K	K	K	K	K	K	K	K	K	K	W	K	K	K	K	K	K	K	K	K
BOPA1_44-481	6H	28.8952	6H	31.59	K	K	K	K	K	K	K	K	K	K	K	K	K	K	K	K	K	K	K	K	K	K	K	K	K	K	K	K	K	K	K	K	K	K	K	W	K	K	K	K	K	K	K	K	K
BOPA2_12_30697	6H	29.9575	6H	33.39	K	K	K	K	K	K	K	K	K	K	K	K	K	K	K	K	K	K	W	K	K	K	K	K	K	K	K	K	K	K	K	K	K	K	K	K	K	K	K	K	K	K	K	K	K
BOPA2_12_30673	6H	30.0992	6H	34.46	K	K	K	K	K	K	K	K	K	K	K	K	K	K	K	K	K	K	W	K	K	K	K	K	K	K	K	K	K	K	K	K	K	K	K	K	K	K	K	K	K	K	K	K	K
BOPA2_12_31308	6H	30.2408	6H	34.46	K	K	K	K	K	K	K	K	K	K	K	K	K	K	K	K	K	K	W	K	K	K	K	K	K	K	K	K	K	K	K	K	K	K	K	K	K	K	K	K	K	K	K	K	K
SCRI_RS_235711	6H	37.9603	6H	44.81	K	K	K	K	K	K	K	K	K	K	K	K	K	K	K	K	K	K	K	K	K	K	K	K	K	K	K	K	K	K	K	K	K	K	K	K	K	K	K	K	K	K	K	K	K
SCRI_RS_154121	6H	38.102	6H	44.91	K	K	K	K	K	K	K	K	K	K	K	K	K	K	K	K	K	K	K	K	K	K	K	K	K	K	K	K	K	K	K	K	K	K	K	K	K	K	K	K	K	K	K	K	K
BOPA2_12_30361	6H	41.0057	6H	47.81	K	K	K	K	K	K	K	K	K	K	K	K	K	K	K	K	K	K	K	K	K	K	K	K	K	K	K	K	K	K	K	K	K	K	K	K	K	K	K	K	K	K	K	K	K
SCRI_RS_162771	6H	43.7677	-	-	K	K	K	K	K	K	K	K	K	K	K	K	K	K	K	K	K	K	K	K	K	K	K	K	K	K	K	K	K	K	K	K	K	K	K	K	K	K	K	K	K	K	K	K	K
BOPA1_5448-298	6H	44.051	6H	50.61	K	K	K	K	K	K	K	K	K	K	K	K	K	K	K	K	K	K	K	K	K	K	K	K	K	K	K	K	K	K	K	K	K	K	K	K	K	K	K	K	K	K	K	K	K
SCRI_RS_115036	6H	44.051	6H	50.61	K	K	K	K	K	K	K	K	K	K	K	K	K	K	K	K	K	K	K	K	K	K	K	K	K	K	K	K	K	K	K	K	K	K	K	K	K	K	K	K	K	K	K	K	K
SCRI_RS_150028	6H	44.051	6H	50.61	K	K	K	K	K	K	K	K	K	K	K	K	K	K	K	K	K	K	K	K	K	K	K	K	K	K	K	K	K	K	K	K	K	K	K	K	K	K	K	K	K	K	K	K	K
SCRI_RS_125560	6H	44.051	-	-	K	K	K	K	K	K	K	K	K	K	K	K	K	K	K	K	K	K	K	K	K	K	K	K	K	K	K	K	K	K	K	K	K	K	K	K	K	K	K	K	K	K	K	K	K
SCRI_RS_157378	6H	44.051	-	-	K	K	K	K	K	K	K	K	K	K	K	K	K	K	K	K	K	K	K	K	K	K	K	K	K	K	K	K	K	K	K	K	K	K	K	K	K	K	K	K	K	K	K	K	K
BOPA2_12_30516	6H	46.2465	6H	51.74	K	K	K	K	K	K	K	K	K	K	K	K	K	K	K	K	K	K	K	K	K	K	K	K	K	K	K	K	K	K	K	K	K	K	K	K	K	K	K	K	K	K	H	K	K
SCRI_RS_139451	6H	46.2465	-	-	K	K	K	K	K	K	K	K	K	K	K	K	K	K	K	K	K	K	K	K	K	K	K	K	K	K	K	K	K	K	K	K	K	K	K	K	K	K	K	K	K	K	K	K	K
BOPA2_12_30665	6H	46.6714	6H	51.74	K	K	K	K	M	M	M	K	M	M	M	K	K	K	K	M	K	K	M	K	K	M	K	M	K	K	K	K	K	K	K	K	K	K	K	K	K	K	K	M	M	K	M	K	M
BOPA1_2176-891	6H	46.6714	6H	52.2	K	K	K	K	K	K	K	K	K	K	K	K	K	K	K	K	K	K	K	K	K	K	K	K	K	K	K	K	K	K	K	K	K	K	K	K	K	K	K	K	K	K	M	K	K
SCRI_RS_171247	6H	47.5212	6H	52.54	K	K	K	K	K	K	K	K	K	K	K	K	K	K	K	K	K	K	K	K	K	K	K	K	K	K	K	K	K	K	K	K	K	K	K	K	K	K	K	K	K	K	K	K	K
SCRI_RS_155654	6H	47.5212	6H	52.54	K	K	K	K	K	K	K	K	K	K	K	K	K	K	K	K	K	K	K	K	K	K	K	K	K	K	K	K	K	K	K	K	K	K	K	K	K	K	K	K	K	K	K	K	K
SCRI_RS_162581	6H	47.9462	6H	52.94	K	K	K	K	K	K	K	K	K	K	K	K	K	K	K	K	K	K	K	K	K	K	K	K	K	K	K	K	K	K	K	K	K	K	K	K	K	K	K	K	K	K	K	K	K
BOPA1_3379-1037	6H	48.796	6H	53.84	K	K	K	K	K	K	K	K	K	K	K	K	K	K	K	K	K	K	K	K	K	K	K	K	K	K	K	K	K	K	K	K	K	K	K	K	K	K	K	K	K	K	K	K	K
BOPA1_4445-1911	6H	48.796	6H	53.84	K	K	K	K	K	K	K	K	K	K	K	K	K	K	K	K	K	K	K	K	K	K	K	K	K	K	K	K	K	K	K	K	K	K	K	K	K	K	K	K	K	K	K	K	K
SCRI_RS_238639	6H	48.796	6H	53.84	K	K	K	K	K	K	K	K	K	K	K	K	K	K	K	K	K	K	K	K	K	K	K	K	K	K	K	K	K	K	K	K	K	K	K	K	K	K	K	K	K	K	K	K	K
BOPA1_1041-1441	6H	49.0793	6H	54.14	K	K	K	K	K	K	K	K	K	K	K	K	K	K	K	K	K	K	K	K	K	K	K	K	K	K	K	K	K	K	K	K	K	K	K	K	K	K	K	K	K	K	K	K	K
BOPA2_12_30316	6H	49.0793	6H	54.14	K	K	K	K	K	K	K	K	K	K	K	K	K	K	K	K	K	K	K	K	K	K	K	K	K	K	K	K	K	K	K	K	K	K	K	K	K	K	K	K	K	K	K	K	K
BOPA2_12_30658	6H	49.0793	6H	54.14	K	K	K	K	K	K	K	K	K	K	K	K	K	K	K	K	K	K	K	K	K	K	K	K	K	K	K	K	K	K	K	K	K	K	K	K	K	K	K	K	K	K	K	K	K
SCRI_RS_119674	6H	49.0793	6H	54.1	K	K	K	K	K	K	K	K	K	K	K	K	K	K	K	K	K	K	K	K	K	K	K	K	K	K	K	K	K	K	K	K	K	K	K	K	K	K	K	K	K	K	K	K	K
SCRI_RS_120783	6H	49.0793	6H	54.1	K	K	K	K	K	K	K	K	K	K	K	K	K	K	K	K	K	K	K	K	K	K	K	K	K	K	K	K	K	K	K	K	K	K	K	K	K	K	K	K	K	K	K	K	K
SCRI_RS_151282	6H	49.0793	6H	54.1	K	K	K	K	K	K	K	K	K	K	K	K	K	K	K	K	K	K	K	K	K	K	K	K	K	K	K	K	K	K	K	K	K	K	K	K	K	K	K	K	K	K	K	K	K
SCRI_RS_168111	6H	49.0793	6H	54.1	K	K	K	K	K	K	K	K	K	K	K	K	K	K	K	K	K	K	K	K	K	K	K	K	K	K	K	K	K	K	K	K	K	K	K	K	K	K	K	K	K	K	K	K	K
SCRI_RS_182004	6H	49.0793	6H	54.1	K	K	K	K	K	K	K	K	K	K	K	K	K	K	K	K	K	K	K	K	K	K	K	K	K	K	K	K	K	K	K	K	K	K	K	K	K	K	K	K	K	K	K	K	K
SCRI_RS_210025	6H	49.0793	6H	54.1	K	K	K	K	K	K	K	K	K	K	K	K	K	K	K	K	K	K	K	K	K	K	K	K	K	K	K	K	K	K	K	K	K	K	K	K	K	K	K	K	K	K	K	K	K
SCRI_RS_188949	6H	49.0793	6H	54.1	K	K	K	K	K	K	K	K	K	K	K	K	K	K	K	K	K	K	K	K	K	K	K	K	K	K	K	K	K	K	K	K	K	K	K	K	K	K	K	K	K	K	K	K	K
SCRI_RS_196459	6H	49.0793	6H	54.1	K	K	K	K	K	K	K	K	K	K	K	K	K	K	K	K	K	K	K	K	K	K	K	K	K	K	K	K	K	K	K	K	K	K	K	K	K	K	K	K	K	K	K	K	K
SCRI_RS_236452	6H	49.0793	6H	54.1	K	K	K	K	K	K	K	K	K	K	K	K	K	K	K	K	K	K	K	K	K	K	K	K	K	K	K	K	K	K	K	K	K	K	K	K	K	K	K	K	K	K	K	K	K
SCRI_RS_200882	6H	49.0793	6H	54.1	K	K	K	K	K	K	K	K	K	K	K	K	K	K	K	K	K	K	K	K	K	K	K	K	K	K	K	K	K	K	K	K	K	K	K	K	K	K	K	K	K	K	K	K	K
SCRI_RS_143259	6H	49.0793	6H	54.1	K	K	K	K	K	K	K	K	K	K	K	K	K	K	K	K	K	K	K	K	K	K	K	K	K	K	K	K	K	K	K	K	K	K	K	K	K	K	K	K	K	K	K	K	K
SCRI_RS_176	6H	49.0793	6H	54.1	K	K	K	K	K	K	K	K	K	K	K	K	K	K	K	K	K	K	K	K	K	K	K	K	K	K	K	K	K	K	K	K	K	K	K	K	K	K	K	K	K	K	K	K	K
BOPA2_12_30133	6H	50.2125	6H	55.08	K	K	K	K	K	K	K	K	K	K	K	K	K	K	K	K	K	K	K	K	K	K	K	K	K	K	K	K	K	K	K	K	K	K	K	K	K	K	K	K	K	K	K	K	K
BOPA2_12_31433	6H	50.2125	6H	55.08	K	K	K	K	K	K	K	K	K	K	K	K	K	K	K	K	K	K	K	K	K	K	K	K	K	K	K	K	K	K	K	K	K	K	K	K	K	K	K	K	K	K	K	K	K
SCRI_RS_140158	6H	50.2125	6H	55.08	K	K	K	K	K	K	K	K	K	K	K	K	K	K	K	K	K	K	K	K	K	K	K	K	K	K	K	K	K	K	K	K	K	K	K	K	K	K	K	K	K	K	K	K	K
SCRI_RS_192720	6H	50.2125	6H	55.08	K	K	K	K	K	K	K	K	K	K	K	K	K	K	K	K	K	K	K	K	K	K	K	K	K	K	K	K	K	K	K	K	K	K	K	K	K	K	K	K	K	K	K	K	K
SCRI_RS_200067	6H	50.2125	6H	55.08	K	K	K	K	K	K	K	K	K	K	K	K	K	K	K	K	K	K	K	K	K	K	K	K	K	K	K	K	K	K	K	K	K	K	K	K	K	K	K	K	K	K	K	K	K
SCRI_RS_239962	6H	50.2125	6H	55.08	K	K	K	K	K	K	K	K	K	K	K	K	K	K	K	K	K	K	K	K	K	K	K	K	K	K	K	K	K	K	K	K	K	K	K	K	K	K	K	K	K	K	K	K	K
SCRI_RS_133544	6H	50.2125	6H	55.08	K	K	K	K	K	K	K	K	K	K	K	K	K	K	K	K	K	K	K	K	K	K	K	K	K	K	K	K	K	K	K	K	K	K	K	K	K	K	K	K	K	K	K	K	K
SCRI_RS_146096	6H	50.2125	6H	55.08	K	K	K	K	K	K	K	K	K	K	K	K	K	K	K	K	K	K	K	K	K	K	K	K	K	K	K	K	K	K	K	K	K	K	K	K	K	K	K	K	K	K	K	K	K
SCRI_RS_157299	6H	50.2125	6H	55.08	K	K	K	K	K	K	K	K	K	K	K	K	K	K	K	K	K	K	K	K	K	K	K	K	K	K	K	K	K	K	K	K	K	K	K	K	K	K	K	K	K	K	K	K	K
SCRI_RS_211299	6H	50.2125	6H	55.08	K	K	K	K	K	K	K	K	K	K	K	K	K	K	K	K	K	K	K	K	K	K	K	K	K	K	K	K	K	K	K	K	K	K	K	K	K	K	K	K	K	K	K	K	K
SCRI_RS_152174	6H	50.2125	6H	55.08	K	K	K	K	K	K	K	K	K	K	K	K	K	K	K	K	K	K	K	K	K	K	K	K	K	K	K	K	K	K	K	K	K	K	K	K	K	K	K	K	K	K	K	K	K
BOPA1_2041-1317	6H	50.3541	6H	55.28	K	K	K	K	K	K	K	K	K	K	K	K	K	K	K	K	K	K	K	K	K	K	K	K	K	K	K	K	K	K	K	K	K	K	K	K	K	K	K	K	K	K	K	K	K
BOPA2_12_30510	6H	50.5666	6H	55.48	K	K	K	K	K	K	K	K	K	K	K	K	K	K	K	K	K	K	K	K	K	K	K	M	K	K	K	K	M	K	K	K	K	K	K	K	K	K	K	K	K	K	K	K	K
SCRI_RS_239889	6H	50.5666	6H	55.7	K	K	K	K	K	K	K	K	K	K	K	K	K	K	K	K	K	K	K	K	K	K	K	K	K	K	K	K	K	K	K	K	K	K	K	K	K	K	K	K	K	K	K	K	K
BOPA1_ABC08769-1-1-205	6H	50.8499	6H	55.9	K	K	K	K	K	K	K	K	K	K	K	K	K	K	K	K	K	K	K	K	K	K	K	K	K	K	K	K	K	K	K	K	K	K	K	K	K	K	K	K	K	K	K	K	K
SCRI_RS_125353	6H	50.8499	6H	55.9	K	K	K	K	K	K	K	K	K	K	K	K	K	K	K	K	K	K	K	K	K	K	K	K	K	K	K	K	K	K	K	K	K	K	K	K	K	K	K	K	K	K	K	K	K
BOPA2_12_21482	6H	50.8499	6H	58.91	K	K	K	K	K	K	K	K	K	K	K	K	K	K	K	K	K	K	K	K	K	K	K	K	K	K	K	K	K	K	K	K	K	K	K	K	K	K	K	K	K	K	K	K	K
SCRI_RS_204495	6H	50.9915	6H	56.1	K	K	K	K	K	K	K	K	K	K	K	K	K	K	K	K	K	K	K	K	K	K	K	K	K	K	K	K	K	K	K	K	K	K	K	K	K	K	K	K	K	K	K	K	K
SCRI_RS_131341	6H	52.0538	6H	57.2	K	K	K	K	K	K	K	K	K	K	K	K	K	K	K	K	K	K	K	K	K	K	K	K	K	K	K	K	K	K	K	K	K	K	K	K	K	K	K	K	K	K	K	K	K
SCRI_RS_135049	6H	52.0538	6H	57.2	K	K	K	K	K	K	K	K	K	K	K	K	K	K	K	K	K	K	K	K	K	K	K	K	K	K	K	K	K	K	K	K	K	K	K	K	K	K	K	K	K	K	K	K	K
SCRI_RS_176150	6H	52.0538	6H	57.2	K	K	K	K	K	K	K	K	K	K	K	K	K	K	K	K	K	K	K	K	K	K	K	K	K	K	K	K	K	K	K	K	K	K	K	W	K	K	K	K	K	K	K	K	K
SCRI_RS_180937	6H	52.0538	6H	57.2	K	K	K	K	K	K	K	K	K	K	K	K	K	K	K	K	K	K	K	K	K	K	K	K	K	K	K	K	K	K	K	K	K	K	K	W	K	K	K	K	K	K	K	K	K
SCRI_RS_2834	6H	52.0538	6H	57.2	K	K	K	K	K	K	K	K	K	K	K	K	K	K	K	K	K	K	K	K	K	K	K	K	K	K	K	K	K	K	K	K	K	K	K	K	K	K	K	K	K	K	K	K	K
BOPA2_12_30473	6H	52.1955	6H	57.64	K	K	K	K	K	K	K	K	K	K	K	K	K	K	K	K	K	K	K	K	K	K	K	K	K	K	K	K	K	K	K	K	K	K	K	K	K	K	K	K	K	K	K	K	K
SCRI_RS_236999	6H	52.1955	6H	57.64	K	K	K	K	K	K	K	K	K	K	K	K	K	K	K	K	K	K	K	K	K	K	K	K	K	K	K	K	K	K	K	K	K	K	K	K	K	K	K	K	K	K	K	K	K
SCRI_RS_148432	6H	52.1955	6H	57.64	K	K	K	K	K	K	K	K	K	K	K	K	K	K	K	K	K	K	K	K	K	K	K	K	K	K	K	K	K	K	K	K	K	K	K	K	K	K	K	K	K	K	K	K	K
SCRI_RS_153619	6H	52.4788	6H	57.94	K	K	K	K	K	K	K	K	K	K	K	K	K	K	K	K	K	K	K	K	K	K	K	K	K	K	K	K	K	K	K	K	K	K	K	K	K	K	K	K	K	K	K	K	K
SCRI_RS_161288	6H	52.4788	6H	57.94	K	K	K	K	K	K	K	K	K	K	K	K	K	K	K	K	K	K	K	K	K	K	K	K	K	K	K	K	K	K	K	K	K	K	K	K	K	K	K	K	K	K	K	K	K
SCRI_RS_166120	6H	52.4788	6H	57.94	K	K	K	K	K	K	K	K	K	K	K	K	K	K	K	K	K	K	K	K	K	K	K	K	K	K	K	K	K	K	K	K	K	K	K	K	K	K	K	K	K	K	K	K	K
BOPA2_12_30430	6H	52.9037	6H	58.34	K	K	K	K	K	K	K	K	K	K	K	K	K	K	K	K	K	K	K	K	K	K	K	K	K	K	K	K	K	K	K	K	K	K	K	K	K	K	K	K	K	K	K	K	K
BOPA2_12_31005	6H	52.9037	6H	58.24	K	K	K	K	K	K	K	K	K	K	K	K	K	K	K	K	K	K	K	K	K	K	K	K	K	K	K	K	K	K	K	K	K	K	K	K	K	K	K	K	K	K	K	K	K
SCRI_RS_158873	6H	52.9037	6H	58.24	K	K	K	K	K	K	K	K	K	K	K	K	K	K	K	K	K	K	K	K	K	K	K	K	K	K	K	K	K	K	K	K	K	K	K	K	K	K	K	K	K	K	K	K	K
SCRI_RS_131647	6H	52.9037	6H	58.24	K	K	K	K	K	K	K	K	K	K	K	K	K	K	K	K	K	K	K	K	K	K	K	K	K	K	K	K	K	K	K	K	K	K	K	K	K	K	K	K	K	K	K	K	K
BOPA2_12_30802	6H	53.3286	6H	58.34	K	K	K	K	K	K	K	K	K	K	K	K	K	K	K	K	K	K	K	K	K	K	K	K	K	K	K	K	K	K	K	K	K	K	K	K	K	K	K	K	K	K	K	K	K
SCRI_RS_164602	6H	53.3286	6H	58.34	K	K	K	K	K	K	K	K	K	K	K	K	K	K	K	K	K	K	K	K	K	K	K	K	K	K	K	K	K	K	K	K	K	K	K	K	K	K	K	K	K	K	K	K	K
SCRI_RS_210918	6H	53.3286	6H	58.34	K	K	K	K	K	K	K	K	K	K	K	K	K	K	K	K	K	K	K	K	K	K	K	K	K	K	K	K	K	K	K	K	K	K	K	K	K	K	K	K	K	K	K	K	K
SCRI_RS_114741	6H	53.3286	6H	58.34	K	K	K	K	K	K	K	K	K	K	K	K	K	K	K	K	K	K	K	K	K	K	K	K	K	K	K	K	K	K	K	K	K	K	K	K	K	K	K	K	K	K	K	K	K
SCRI_RS_130732	6H	53.3286	6H	58.34	K	K	K	K	K	K	K	K	K	K	K	K	K	K	K	K	K	K	K	K	K	K	K	K	K	K	K	K	K	K	K	K	K	K	K	K	K	K	K	K	K	K	K	K	K
SCRI_RS_156115	6H	53.3286	6H	58.34	K	K	K	K	K	K	K	K	K	K	K	K	K	K	K	K	K	K	K	K	K	K	K	K	K	K	K	K	K	K	K	K	K	K	K	K	K	K	K	K	K	K	K	K	K
SCRI_RS_189606	6H	53.3286	-	-	K	K	K	K	K	K	K	K	K	K	K	K	K	K	K	K	K	K	K	K	K	K	K	K	K	K	K	K	K	K	K	K	K	K	K	K	K	K	K	K	K	K	K	K	K
SCRI_RS_195226	6H	53.5411	6H	58.34	K	K	M	K	K	K	K	K	K	K	K	K	K	K	K	K	K	K	K	M	K	K	K	M	M	K	K	K	K	K	K	K	K	K	K	K	K	K	K	K	M	K	K	K	K
BOPA1_5873-880	6H	53.6119	6H	58.34	K	K	K	K	K	K	K	K	K	K	K	K	K	K	K	K	K	K	K	K	K	K	K	K	K	K	K	K	K	K	K	K	K	K	K	K	K	K	K	K	K	K	K	K	K
BOPA1_828-545	6H	53.6119	6H	58.34	K	K	K	K	K	K	K	K	K	K	K	K	K	K	K	K	K	K	K	K	K	K	K	K	K	K	K	K	K	K	K	K	K	K	K	K	K	K	K	K	K	K	K	K	K
SCRI_RS_200419	6H	53.6119	6H	58.34	K	K	K	K	K	K	K	K	K	K	K	K	K	K	K	K	K	K	K	K	K	K	K	K	K	K	K	K	K	K	K	K	K	K	K	K	K	K	K	K	K	K	K	K	K
SCRI_RS_182515	6H	53.6119	6H	58.34	K	K	K	K	K	K	K	K	K	K	K	K	K	K	K	K	K	K	K	K	K	K	K	K	K	K	K	K	K	K	K	K	K	K	K	K	K	K	K	K	K	K	K	K	K
BOPA1_397-288	6H	53.7535	6H	58.34	K	K	K	K	K	K	K	K	K	K	K	K	K	K	K	K	K	K	K	K	K	K	K	K	K	K	K	K	K	K	K	K	K	K	K	K	K	K	K	K	K	K	K	K	K
SCRI_RS_131870	6H	53.7535	6H	58.34	K	K	K	K	K	K	K	K	K	K	K	K	K	K	K	K	K	K	K	K	K	K	K	K	K	K	K	K	K	K	K	K	K	K	K	K	K	K	K	K	K	K	K	K	K
SCRI_RS_193776	6H	53.7535	6H	58.34	K	K	K	K	K	K	K	K	K	K	K	K	K	K	K	K	K	K	K	K	K	K	K	K	K	K	K	K	K	K	K	K	K	K	K	K	K	K	K	K	K	K	K	K	K
SCRI_RS_215773	6H	53.7535	6H	58.34	K	K	K	K	K	K	K	K	K	K	K	K	K	K	K	K	K	K	K	K	K	K	K	K	K	K	K	K	K	K	K	K	K	K	K	K	K	K	K	K	K	K	K	K	K
SCRI_RS_205256	6H	53.8952	6H	58.44	K	K	K	K	K	K	K	K	K	K	K	K	K	K	K	K	K	K	K	K	K	K	K	K	K	K	K	K	K	K	K	K	K	K	K	K	K	K	K	K	K	K	K	K	K
BOPA2_12_30465	6H	54.8867	6H	58.91	K	K	K	K	K	K	K	K	K	K	K	K	K	K	K	K	K	K	K	K	K	K	K	K	K	K	K	K	K	K	K	K	K	K	K	K	K	K	K	K	K	K	K	K	K
BOPA2_12_30511	6H	54.8867	6H	58.91	K	K	K	K	K	K	K	K	K	K	K	K	K	K	K	K	K	K	K	K	K	K	K	K	K	K	K	K	K	K	K	K	K	K	K	K	K	K	K	K	K	K	K	K	K
BOPA2_12_30596	6H	54.8867	6H	58.91	K	K	K	K	K	K	K	K	K	K	K	K	K	K	K	K	K	K	K	K	K	K	K	K	K	K	K	K	K	K	K	K	K	K	K	K	K	K	K	K	K	K	K	K	K
BOPA2_12_30856	6H	54.8867	6H	58.91	K	K	K	K	K	K	K	K	K	K	K	K	K	K	K	K	K	K	K	K	K	K	K	K	K	K	K	K	K	K	K	K	K	K	K	K	K	K	K	K	K	K	K	K	K
SCRI_RS_122124	6H	54.8867	6H	58.81	K	K	K	K	K	K	K	K	K	K	K	K	K	K	K	K	K	K	K	K	K	K	K	K	K	K	K	K	K	K	K	K	K	K	K	K	K	K	K	K	K	K	K	K	K
SCRI_RS_196518	6H	54.8867	6H	58.81	K	K	K	K	K	K	K	K	K	K	K	K	K	K	K	K	K	K	K	K	K	K	K	K	K	K	K	K	K	K	K	K	K	K	K	K	K	K	K	K	K	K	K	K	K
SCRI_RS_142727	6H	54.8867	6H	58.81	K	K	K	K	K	K	K	K	K	K	K	K	K	K	K	K	K	K	K	K	K	K	K	K	K	K	K	K	K	K	K	K	K	K	K	K	K	K	K	K	K	K	K	K	K
SCRI_RS_144098	6H	54.8867	6H	58.81	K	K	K	K	K	K	K	K	K	K	K	K	K	K	K	K	K	K	K	K	K	K	K	K	K	K	K	K	K	K	K	K	K	K	K	K	K	K	K	K	K	K	K	K	K
SCRI_RS_34440	6H	54.8867	6H	58.81	K	K	K	K	K	K	K	K	K	K	K	K	K	K	K	K	K	K	K	K	K	K	K	K	K	K	K	K	K	K	K	K	K	K	K	K	K	K	K	K	K	K	K	K	K
SCRI_RS_72672	6H	54.8867	6H	58.81	K	K	K	K	K	K	K	K	K	K	K	K	K	K	K	K	K	K	K	K	K	K	K	K	K	K	K	K	K	K	K	K	K	K	K	K	K	K	K	K	K	K	K	K	K
SCRI_RS_80327	6H	54.8867	6H	58.81	K	K	K	K	K	K	K	K	K	K	K	K	K	K	K	K	K	K	K	K	K	K	K	K	K	K	K	K	K	K	K	K	K	K	K	K	K	K	K	K	K	K	K	K	K
BOPA1_3658-1310	6H	54.8867	6H	58.91	K	K	K	K	K	K	K	K	K	K	K	K	K	K	K	K	K	K	K	K	K	K	K	K	K	K	K	K	K	K	K	K	K	K	K	K	K	K	K	K	K	K	K	K	K
SCRI_RS_10964	6H	54.8867	-	-	K	K	K	K	K	K	K	K	K	K	K	K	K	K	K	K	K	K	K	K	K	K	K	K	K	K	K	K	K	K	K	K	K	K	K	K	K	K	K	K	K	K	K	K	K
BOPA1_2259-488	6H	55.0283	6H	58.91	K	K	K	K	K	K	K	K	K	K	K	K	K	K	K	K	K	K	K	K	K	K	K	K	K	K	K	K	K	K	K	K	K	K	K	K	K	K	K	K	K	K	K	K	K
BOPA1_2559-1796	6H	55.0283	6H	58.91	K	K	K	K	K	K	K	K	K	K	K	K	K	K	K	K	K	K	K	K	K	K	K	K	K	K	K	K	K	K	K	K	K	K	K	K	K	K	K	K	K	K	K	K	K
BOPA1_3506-668	6H	55.0283	6H	58.91	K	K	K	K	K	K	K	K	K	K	K	K	K	K	K	K	K	K	K	K	K	K	K	K	K	K	K	K	K	K	K	K	K	K	K	K	K	K	K	K	K	K	K	K	K
BOPA1_4721-1335	6H	55.0283	6H	58.91	K	K	K	K	K	K	K	K	K	K	K	K	K	K	K	K	K	K	K	K	K	K	K	K	K	K	K	K	K	K	K	K	K	K	K	K	K	K	K	K	K	K	K	K	K
BOPA1_5497-661	6H	55.0283	6H	58.91	K	K	K	K	K	K	K	K	K	K	K	K	K	K	K	K	K	K	K	K	K	K	K	K	K	K	K	K	K	K	K	K	K	K	K	K	K	K	K	K	K	K	K	K	K
BOPA2_12_30508	6H	55.0283	6H	58.91	K	K	K	K	K	K	K	K	K	K	K	K	K	K	K	K	K	K	K	K	K	K	K	K	K	K	K	K	K	K	K	K	K	K	K	K	K	K	K	K	K	K	K	K	K
BOPA2_12_30837	6H	55.0283	6H	58.91	K	K	K	K	K	K	K	K	K	K	K	K	K	K	K	K	K	K	K	K	K	K	K	K	K	K	K	K	K	K	K	K	K	K	K	K	K	K	K	K	K	K	K	K	K
BOPA2_12_31249	6H	55.0283	6H	58.91	K	K	K	K	K	K	K	K	K	K	K	K	K	K	K	K	K	K	K	K	K	K	K	K	K	K	K	K	K	K	K	K	K	K	K	K	K	K	K	K	K	K	K	K	K
SCRI_RS_153502	6H	55.0283	6H	58.91	K	K	K	K	K	K	K	K	K	K	K	K	K	K	K	K	K	K	K	K	K	K	K	K	K	K	K	K	K	K	K	K	K	K	K	K	K	K	K	K	K	K	K	K	K
SCRI_RS_162961	6H	55.0283	6H	58.91	K	K	K	K	K	K	K	K	K	K	K	K	K	K	K	K	K	K	K	K	K	K	K	K	K	K	K	K	K	K	K	K	K	K	K	K	K	K	K	K	K	K	K	K	K
SCRI_RS_224695	6H	55.0283	6H	58.91	K	K	K	K	K	K	K	K	K	K	K	K	K	K	K	K	K	K	K	K	K	K	K	K	K	K	K	K	K	K	K	K	K	K	K	K	K	K	K	K	K	K	K	K	K
SCRI_RS_233266	6H	55.0283	6H	58.91	K	K	K	K	K	K	K	K	K	K	K	K	K	K	K	K	K	K	K	K	K	K	K	K	K	K	K	K	K	K	K	K	K	K	K	K	K	K	K	K	K	K	K	K	K
SCRI_RS_237750	6H	55.0283	6H	58.91	K	K	K	K	K	K	K	K	K	K	K	K	K	K	K	K	K	K	K	K	K	K	K	K	K	K	K	K	K	K	K	K	K	K	K	K	K	K	K	K	K	K	K	K	K
SCRI_RS_192768	6H	55.0283	6H	58.91	K	K	K	K	K	K	K	K	K	K	K	K	K	K	K	K	K	K	K	K	K	K	K	K	K	K	K	K	K	K	K	K	K	K	K	K	K	K	K	K	K	K	K	K	K
SCRI_RS_160798	6H	55.0283	6H	58.91	M	M	K	K	K	K	K	K	K	K	K	K	K	K	M	K	K	M	K	K	M	K	K	K	K	K	K	K	M	K	M	K	K	K	M	K	M	M	K	K	K	K	K	K	K
SCRI_RS_163053	6H	55.0283	6H	58.91	K	K	K	K	K	K	K	K	K	K	K	K	K	K	K	K	K	K	K	K	K	K	K	K	K	K	K	K	K	K	K	K	K	K	K	K	K	K	K	K	K	K	K	K	K
SCRI_RS_175593	6H	55.0283	6H	58.91	K	K	K	K	K	K	K	K	K	K	K	K	K	K	K	K	K	K	K	K	K	K	K	K	K	K	K	K	K	K	K	K	K	K	K	K	K	K	K	K	K	K	K	K	K
SCRI_RS_108698	6H	55.0283	6H	58.91	K	K	K	K	K	K	K	K	K	K	K	K	K	K	K	K	K	K	K	K	K	K	K	K	K	K	K	K	K	K	K	K	K	K	K	K	K	K	K	K	K	K	K	K	K
SCRI_RS_10685	6H	55.0283	6H	58.91	K	K	K	K	K	K	K	K	K	K	K	K	K	K	K	K	K	K	K	K	K	K	K	K	K	K	K	K	K	K	K	K	K	K	K	K	K	K	K	K	K	K	K	K	K
SCRI_RS_143415	6H	55.0283	6H	58.91	K	K	K	K	K	K	K	K	K	K	K	K	K	K	K	K	K	K	K	K	K	K	K	K	K	K	K	K	K	K	K	K	K	K	K	K	K	K	K	K	K	K	K	K	K
SCRI_RS_138253	6H	55.0283	6H	58.91	K	K	K	K	K	K	K	K	K	K	K	K	K	K	K	K	K	K	K	K	K	K	K	K	K	K	K	K	K	K	K	K	K	K	K	K	K	K	K	K	K	K	K	K	K
BOPA2_12_30254	6H	55.0283	-	-	K	K	K	K	K	K	K	K	K	K	K	K	K	K	K	K	K	K	K	K	K	K	K	K	K	K	K	K	K	K	K	K	K	K	K	K	K	K	K	K	K	K	K	K	K
BOPA2_12_31479	6H	55.0283	-	-	K	K	K	K	K	K	K	K	K	K	K	K	K	K	K	K	K	K	K	K	K	K	K	K	K	K	K	K	K	K	K	K	K	K	K	K	K	K	K	K	K	K	K	K	K
SCRI_RS_136604	6H	55.0283	-	-	K	K	K	K	K	K	K	K	K	K	K	K	K	K	K	K	K	K	K	K	K	K	K	K	K	K	K	K	K	K	K	K	K	K	K	K	K	K	K	K	K	K	K	K	K
SCRI_RS_188305	6H	55.0283	-	-	K	K	K	K	K	K	K	K	K	K	K	K	K	K	K	K	K	K	K	K	K	K	K	K	K	K	K	K	K	K	K	K	K	K	K	K	K	K	K	K	K	K	K	K	K
SCRI_RS_195914	6H	55.0283	-	-	K	K	K	K	K	K	K	K	K	K	K	K	K	K	K	K	K	K	K	K	K	K	K	K	K	K	K	K	K	K	K	K	K	K	K	K	K	K	K	K	K	K	K	K	K
SCRI_RS_237307	6H	55.0283	-	-	K	K	K	K	K	K	K	K	K	K	K	K	K	K	K	K	K	K	K	K	K	K	K	K	K	K	K	K	K	K	K	K	K	K	K	K	K	K	K	K	K	K	K	K	K
BOPA1_210-450	6H	55.3824	6H	58.91	K	K	K	K	K	K	K	K	K	K	K	K	K	K	K	K	K	K	K	K	K	K	K	K	K	K	K	K	K	K	K	K	K	K	K	K	K	K	K	K	K	K	K	K	K
BOPA1_4895-145	6H	55.3824	6H	58.91	K	K	K	K	K	K	K	K	K	K	K	K	K	K	K	K	K	K	K	K	K	K	K	K	K	K	K	K	K	K	K	K	K	K	K	K	K	K	K	K	K	K	K	K	K
SCRI_RS_224389	6H	55.3824	6H	58.91	K	K	K	K	K	K	K	K	K	K	K	K	K	K	K	K	K	K	K	K	K	K	K	K	K	K	K	K	K	K	K	K	K	K	K	K	K	K	K	K	K	K	K	K	K
SCRI_RS_239642	6H	55.3824	6H	58.91	K	K	K	K	K	K	K	K	K	K	K	K	K	K	K	K	K	K	K	K	K	K	K	K	K	K	K	K	K	K	K	K	K	K	K	K	K	K	K	K	K	K	K	K	K
SCRI_RS_138529	6H	55.3824	6H	58.91	K	K	K	K	K	K	K	K	K	K	K	K	K	K	K	K	K	K	K	K	K	K	K	K	K	K	K	K	K	K	K	K	K	K	K	K	K	K	K	K	K	K	K	K	K
SCRI_RS_213566	6H	55.5241	6H	59.01	K	K	K	K	K	K	K	K	K	K	K	K	K	K	K	K	K	K	K	K	K	K	K	K	K	K	K	K	K	K	K	K	K	K	K	K	K	K	K	K	K	K	K	K	K
SCRI_RS_142541	6H	55.5241	6H	59.01	K	K	K	K	K	K	K	K	K	K	K	K	K	K	K	K	K	K	K	K	K	K	K	K	K	K	K	K	K	K	K	K	K	K	K	K	K	K	K	K	K	K	K	K	K
SCRI_RS_146867	6H	55.6657	6H	59.21	K	K	K	K	K	K	K	K	K	K	K	K	K	K	K	K	K	K	K	K	K	K	K	K	K	K	K	K	K	K	K	K	K	K	K	K	K	K	K	K	K	K	K	K	K
SCRI_RS_137464	6H	55.6657	-	-	K	K	K	K	K	K	K	K	K	K	K	K	K	K	K	K	K	K	K	K	K	K	K	K	K	K	K	K	K	K	K	K	K	K	K	K	K	K	K	K	K	K	K	K	K
SCRI_RS_165041	6H	56.0198	6H	59.51	K	K	K	K	K	K	K	K	K	K	K	K	K	K	K	K	K	K	K	K	K	K	K	K	K	K	K	K	K	K	K	K	K	K	K	W	K	K	K	K	K	K	K	K	K
BOPA2_12_30857	6H	56.1615	6H	59.71	K	K	K	K	K	K	K	K	K	K	K	K	K	K	K	K	K	K	K	K	K	K	K	K	K	K	K	K	K	K	K	K	K	K	K	W	K	K	K	K	K	K	K	K	K
BOPA2_12_30144	6H	56.6572	6H	60.21	K	K	K	K	K	K	K	K	K	K	K	K	K	K	K	K	K	K	K	K	K	K	K	K	K	K	K	K	K	K	K	K	K	K	K	W	K	K	K	K	K	K	K	K	K
SCRI_RS_182180	6H	57.2238	6H	60.71	K	K	K	K	K	K	K	K	K	K	K	K	K	K	K	K	K	K	K	K	K	K	K	K	K	K	K	K	K	K	K	K	K	K	K	W	K	K	K	K	K	K	K	K	K
SCRI_RS_222944	6H	57.2238	6H	60.71	K	K	K	K	K	K	K	K	K	K	K	K	K	K	K	K	K	K	K	K	K	K	K	K	K	K	K	K	K	K	K	K	K	K	K	W	K	K	K	K	K	K	K	K	K
SCRI_RS_114613	6H	57.2238	6H	60.71	K	K	K	K	K	K	K	K	K	K	K	K	K	K	K	K	K	K	K	K	K	K	K	K	K	K	K	K	K	K	K	K	K	K	K	W	K	K	K	K	K	K	K	K	K
SCRI_RS_140091	6H	57.2238	6H	60.71	K	K	K	K	K	K	K	K	K	K	K	K	K	K	K	K	K	K	K	K	K	K	K	K	K	K	K	K	K	K	K	K	K	K	K	W	K	K	K	K	K	K	K	K	K
SCRI_RS_153707	6H	57.2238	6H	60.71	K	K	K	K	K	K	K	K	K	K	K	K	K	K	K	K	K	K	K	K	K	K	K	K	K	K	K	K	K	K	K	K	K	K	K	W	K	K	K	K	K	K	K	K	K
SCRI_RS_174583	6H	57.2238	6H	60.71	K	K	K	K	K	K	K	K	K	K	K	K	K	K	K	K	K	K	K	K	K	K	K	K	K	K	K	K	K	K	K	K	K	K	K	W	K	K	K	K	K	K	K	K	K
SCRI_RS_187697	6H	57.2238	6H	60.71	K	K	K	K	K	K	K	K	K	K	K	K	K	K	K	K	K	K	K	K	K	K	K	K	K	K	K	K	K	K	K	K	K	K	K	W	K	K	K	K	K	K	K	K	K
SCRI_RS_223224	6H	58.3569	6H	61.91	K	K	K	K	K	K	K	K	K	K	K	K	K	K	K	K	K	K	K	K	K	K	K	K	K	K	K	K	K	K	K	K	K	K	K	W	K	K	K	K	K	K	K	K	K
BOPA1_ABC02895-1-4-231	6H	59.4193	6H	62.91	K	K	K	K	K	K	K	K	K	K	K	K	K	K	K	K	K	K	K	K	K	K	K	K	K	K	K	K	K	K	K	K	K	K	K	W	K	K	K	K	K	K	K	K	K
SCRI_RS_134034	6H	59.4193	6H	62.91	K	K	K	K	K	K	K	K	K	K	K	K	K	K	K	K	K	K	K	K	K	K	K	K	K	K	K	K	K	K	K	K	K	K	K	W	K	K	K	K	K	K	K	K	K
SCRI_RS_222315	6H	59.4193	-	-	K	K	K	K	K	K	K	K	K	K	K	K	K	K	K	K	K	K	K	K	K	K	K	K	K	K	K	K	K	K	K	K	K	K	K	W	K	K	K	K	K	K	K	K	K
BOPA1_2298-1526	6H	59.915	6H	64.29	K	K	K	K	K	K	K	K	K	K	K	K	K	K	K	K	K	K	K	K	K	K	K	K	K	K	K	K	K	K	K	K	K	K	K	W	K	K	K	K	K	K	K	K	K
BOPA1_3656-341	6H	59.915	6H	59.33	K	K	K	K	K	K	K	K	K	K	K	K	K	K	K	K	K	K	K	K	K	K	K	K	K	K	K	K	K	K	K	K	K	K	K	K	K	K	K	K	K	K	K	K	K
SCRI_RS_133367	6H	59.915	-	-	K	K	K	K	K	K	K	K	K	K	K	K	K	K	K	K	K	K	K	K	K	K	K	K	K	K	K	K	K	K	K	K	K	K	K	W	K	K	K	K	K	K	K	K	K
SCRI_RS_140640	6H	59.915	-	-	K	K	K	K	K	K	K	K	K	K	K	K	K	K	K	K	K	K	K	K	K	K	K	K	K	K	K	K	K	K	K	K	K	K	K	W	K	K	K	K	K	K	K	K	K
SCRI_RS_158011	6H	59.915	-	-	K	K	K	K	K	K	K	K	K	K	K	K	K	K	K	K	K	K	K	K	K	K	K	K	K	K	K	K	K	K	K	K	K	K	K	W	K	K	K	K	K	K	K	K	K
SCRI_RS_184086	6H	59.915	-	-	K	K	K	K	K	K	K	K	K	K	K	K	K	K	K	K	K	K	K	K	K	K	K	K	K	K	K	K	K	K	K	K	K	K	K	K	K	K	K	K	K	K	K	K	K
SCRI_RS_217259	6H	59.915	-	-	K	K	K	K	K	K	K	K	K	K	K	K	K	K	K	K	K	K	K	K	K	K	K	K	K	K	K	K	K	K	K	K	K	K	K	W	K	K	K	K	K	K	K	K	K
SCRI_RS_236545	6H	59.915	-	-	K	K	K	K	K	K	K	K	K	K	K	K	K	K	K	K	K	K	K	K	K	K	K	K	K	K	K	K	K	K	K	K	K	K	K	W	K	K	K	K	K	K	K	K	K
SCRI_RS_237419	6H	59.915	-	-	K	K	K	K	K	K	K	K	K	K	K	K	K	K	K	K	K	K	K	K	K	K	K	K	K	K	K	K	K	K	K	K	K	K	K	W	K	K	K	K	K	K	K	K	K
SCRI_RS_224297	6H	59.915	-	-	K	K	K	K	K	K	K	K	K	K	K	K	K	K	K	K	K	K	K	K	K	K	K	K	K	K	K	K	K	K	K	K	K	K	K	W	K	K	K	K	K	K	K	K	K
SCRI_RS_115369	6H	59.915	-	-	K	K	K	K	K	K	K	K	K	K	K	K	K	K	K	K	K	K	K	K	K	K	K	K	K	K	K	K	K	K	K	K	K	K	K	K	K	K	K	K	K	K	K	K	K
SCRI_RS_106581	6H	59.915	-	-	K	K	K	K	K	K	K	K	K	K	K	K	K	K	K	K	K	K	K	K	K	K	K	K	K	K	K	K	K	K	K	K	K	K	K	W	K	K	K	K	K	K	K	K	K
SCRI_RS_148543	6H	59.915	-	-	K	K	K	K	K	K	K	K	K	K	K	K	K	K	K	K	K	K	K	K	K	K	K	K	K	K	K	K	K	K	K	K	K	K	K	W	K	K	K	K	K	K	K	K	K
SCRI_RS_211289	6H	60.4816	6H	65.08	K	K	K	K	K	K	K	K	K	K	K	K	K	K	K	K	K	K	K	K	K	K	K	K	K	K	K	K	K	K	K	K	K	K	K	W	K	K	K	K	K	K	K	K	K
SCRI_RS_143492	6H	60.4816	-	-	K	K	K	K	K	K	K	K	K	K	K	K	K	K	K	K	K	K	K	K	K	K	K	K	K	K	K	K	K	K	K	K	K	K	K	W	K	K	K	K	K	K	K	K	K
SCRI_RS_187114	6H	60.4816	-	-	K	K	K	K	K	K	K	K	K	K	K	K	K	K	K	K	K	K	K	K	K	K	K	K	K	K	K	K	K	K	K	K	K	K	K	W	K	K	K	K	K	K	K	K	K
SCRI_RS_226330	6H	60.4816	-	-	K	K	K	K	K	K	K	K	K	K	K	K	K	K	K	K	K	K	K	K	K	K	K	K	K	K	K	K	K	K	K	K	K	K	K	W	K	K	K	K	K	K	K	K	K
SCRI_RS_154772	6H	60.4816	-	-	K	K	K	K	K	K	K	K	K	K	K	K	K	K	K	K	K	K	K	K	K	K	K	K	K	K	K	K	K	K	K	K	K	K	K	W	K	K	K	K	K	K	K	K	K
SCRI_RS_137824	6H	60.6232	6H	65.28	K	K	K	K	K	K	K	K	K	K	K	K	K	K	K	K	K	K	K	K	K	K	K	K	K	K	K	K	K	K	K	K	K	K	K	W	K	K	K	K	K	K	K	K	K
BOPA1_4313-482	6H	60.9065	6H	65.38	K	K	K	K	K	K	K	K	K	K	K	K	K	K	K	K	K	K	K	K	K	K	K	K	K	K	K	K	K	K	K	K	K	K	K	W	K	K	K	K	K	K	K	K	K
SCRI_RS_204148	6H	61.0482	6H	68.09	K	K	M	K	K	K	K	K	K	K	K	K	K	K	K	K	K	K	K	M	K	K	K	M	K	K	M	K	K	K	K	K	K	K	K	W	K	K	K	K	K	K	K	K	K
BOPA1_8048-952	6H	62.7479	6H	69.79	K	K	K	K	K	K	K	K	K	K	K	K	K	K	K	K	K	K	K	K	K	K	K	K	K	K	K	K	K	K	K	K	K	K	K	K	K	K	K	K	K	K	K	K	K
BOPA1_5251-184	6H	62.7479	6H	70.89	K	K	K	K	K	K	K	K	K	K	K	K	K	K	K	K	K	K	K	K	K	K	K	K	K	K	K	K	K	K	K	K	K	K	K	K	K	K	K	K	K	K	K	K	K
BOPA1_7370-818	6H	63.4561	6H	70.59	K	K	K	K	K	K	K	K	K	K	K	K	K	K	K	K	K	K	K	K	K	K	K	K	K	K	K	K	K	K	K	K	K	K	K	K	K	K	K	K	K	K	K	K	K
BOPA1_8005-914	6H	63.4561	6H	70.59	K	K	K	K	K	K	K	K	K	K	K	K	K	K	K	K	K	K	K	K	K	K	K	K	K	K	K	K	K	K	K	K	K	K	K	K	K	K	K	K	K	K	K	K	K
BOPA2_12_30637	6H	63.4561	6H	70.59	K	K	K	K	K	K	K	K	K	K	K	K	K	K	K	K	K	K	K	K	K	K	K	K	K	K	K	K	K	K	K	K	K	K	K	K	K	K	K	K	K	K	K	K	K
BOPA1_2026-302	6H	63.881	6H	72.79	K	K	K	K	K	K	K	K	K	K	K	K	K	K	K	K	K	K	K	K	K	K	K	K	K	K	K	K	K	K	K	K	K	K	K	K	K	K	K	K	K	K	K	K	K
[truncated: 493 more rows]
[truncated: 38 more columns]
