# Supplementary material for: QTL controlling grain filling under terminal drought stress in a set of wild barley introgression lines
Source: PLoS One. 2017 Oct 20;12(10):e0185983. doi: 10.1371/journal.pone.0185983 (PMC5650137; doi:10.1371/journal.pone.0185983)
Supplement: S3 Table — (XLSX) [file pone.0185983.s003.xlsx]

## Sheet: Tab. S2) Trait correlations
S3 Table: Pearson’s correlation coefficient (r) between seven traits measured in the S42IL population under the well-watered and drought treatments.
Well-watered
	BIO	TGW	HEI	GEA	GWE	HEA
YLD	0.39**	0.47***	0.6***	0.5***	0.81***	0.19
BIO		-0.04	0.51***	0.43**	0.39**	0.54***
TGW			0.11	-0.27	0.5***	-0.44**
HEI				0.51***	0.55***	0.4**
GEA					0.69***	0.55***
GWE						0.18
Drought
	BIO	TGW	HEI	GEA	GWE	HEA
YLD	0.56***	0.59***	0.43**	0.46***	0.83***	0.18
BIO		0.06	0.53***	0.65***	0.56***	0.67***
TGW			-0.02	-0.18	0.61***	-0.46***
HEI				0.53***	0.43**	0.47***
GEA					0.67***	0.65***
GWE						0.17
Significant trait correlations are indicated, p-value <0.05 ‘*’, <0.01 ‘**’, <0.001‘***’
